# Supplementary material for: Synthesis of Diversified Pyrazolo[3,4-b]pyridine Frameworks from 5-Aminopyrazoles and Alkynyl Aldehydes via Switchable C≡C Bond Activation Approaches
Source: Molecules. 2022 Sep 27;27(19):6381. doi: 10.3390/molecules27196381 (PMC9571537; doi:10.3390/molecules27196381)

*Supplementary Materials*

**Synthesis of Diversified Pyrazolo[3,4-*b*]pyridine Frameworks from 5-Aminopyrazoles and Alkynyl aldehydes via Switchable C≡C bond Activation Approaches**

Xiao-Yu Miao,<sup>1†</sup> Yong-Ji Hu,<sup>1†</sup> Fu-Rao Liu,<sup>1</sup> Yuan-Yuan Sun,<sup>1</sup> Die Sun,<sup>1</sup> An-Xin Wu,<sup>2\*</sup> Yan-Ping Zhu<sup>1\*</sup>

<sup>1</sup> School of Pharmacy, Key Laboratory of Molecular Pharmacology and Drug Evaluation, Ministry of Education, Collaborative Innovation Center of Advanced Drug Delivery System and Biotech Drugs in Universities of Shandong, Yantai University, Shandong, Yantai, 264005, P. R. China

<sup>2</sup> Key Laboratory of Pesticide & Chemical Biology, Ministry of Education, College of Chemistry, Central China Normal University, Hubei, Wuhan, 430079, P. R. China

<sup>†</sup> These authors contributed equally to this work.

## Table of Contents

|                                                                           |     |
|---------------------------------------------------------------------------|-----|
| 1. General information .....                                              | S1  |
| 2. Mechanism investigation.....                                           | S1  |
| 3. Experimental Procedures.....                                           | S8  |
| 4. Characterization of Products .....                                     | S15 |
| 5. Copy of $^1\text{H}$ and $^{13}\text{C}$ NMR Spectra of Products ..... | S38 |

## 1. General information

**Materials and General Experimental:** Aminopyrazoles and NBS were purchased from Shanghai Shaoyuan Co. Ltd. 3-Phenylpropiolaldehyde and Ag(CF<sub>3</sub>CO<sub>2</sub>) were purchased from Leyan. Unless stated otherwise, all solvents and commercially available reagents were obtained from commercial suppliers and used without further purification. In addition, petroleum ether (b.p. 60-90 °C), which was used for column chromatography, was distilled prior to use. Non-commercial starting materials were prepared as described below or according to literature procedures. Analytical thin layer chromatography (TLC) was performed using pre-coated silica gel HF254 glass plates. Column chromatography was performed using silica gel (200-300 mesh).

**Instrumentation:** Nuclear magnetic resonance (NMR) spectra were recorded on a Bruker Advance 400 MHz spectrometer at ambient temperature using the non or partly deuterated solvent as internal standard (<sup>1</sup>H: δ 7.26 ppm and <sup>13</sup>C{<sup>1</sup>H}: δ 77.0 ppm for CDCl<sub>3</sub>). Chemical shifts (δ) are reported in ppm, relative to the internal standard of tetramethylsilane (TMS). The coupling constants (*J*) are quoted in hertz (Hz). Resonances are described as s (singlet), d (doublet), t (triplet), q (quartet), m (multiplet), br (broad) or combinations thereof. High resolution mass spectra were obtained on Thermo Scientific Q-Exactive (ESI mode). Melting points were determined using SGW X-4 apparatus and not corrected.

## 2. Mechanism investigation

### 2.1 The control experimental results

When the reaction of **1a** with **2a** was conducted under the standard conditions without acid for 2 h, product **3a** was obtained in 40% yield and 5-methyl-2-phenyl-4-(3-phenylprop-2-yn-1-ylidene)-2,4-dihydro-3*H*-pyrazol-3-imine (**3a'**) could be detected by TLC-MS (APCI) and NMR (Figure S1-S4).

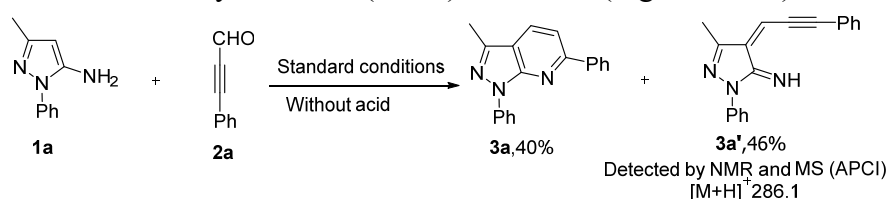

**Scheme S1.** Control experiment for the reaction of **1a** with **2a**.

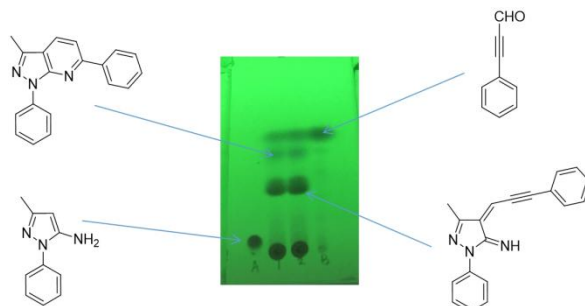

**Figure S1.** The TLC results for the reaction of **1a** with **2a**.

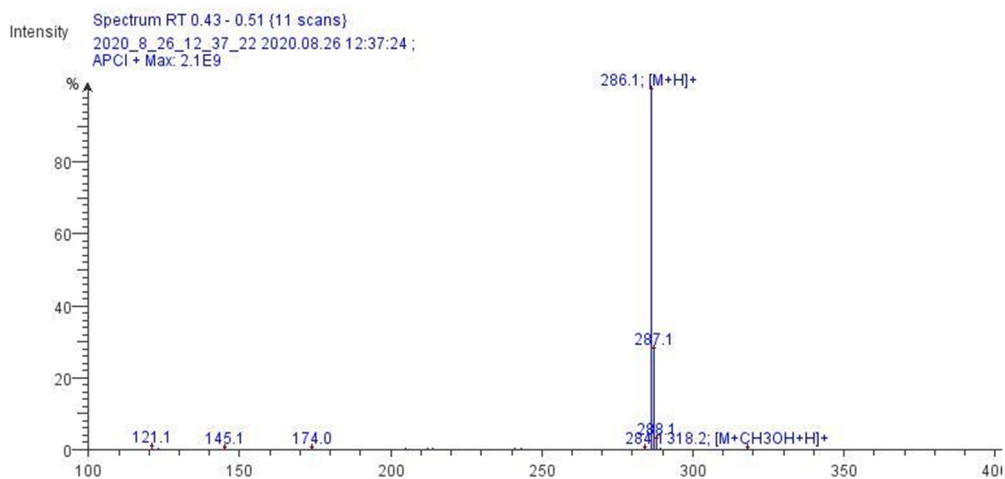

**Figure S2.** The MS (APCI) results for the **3a'**.

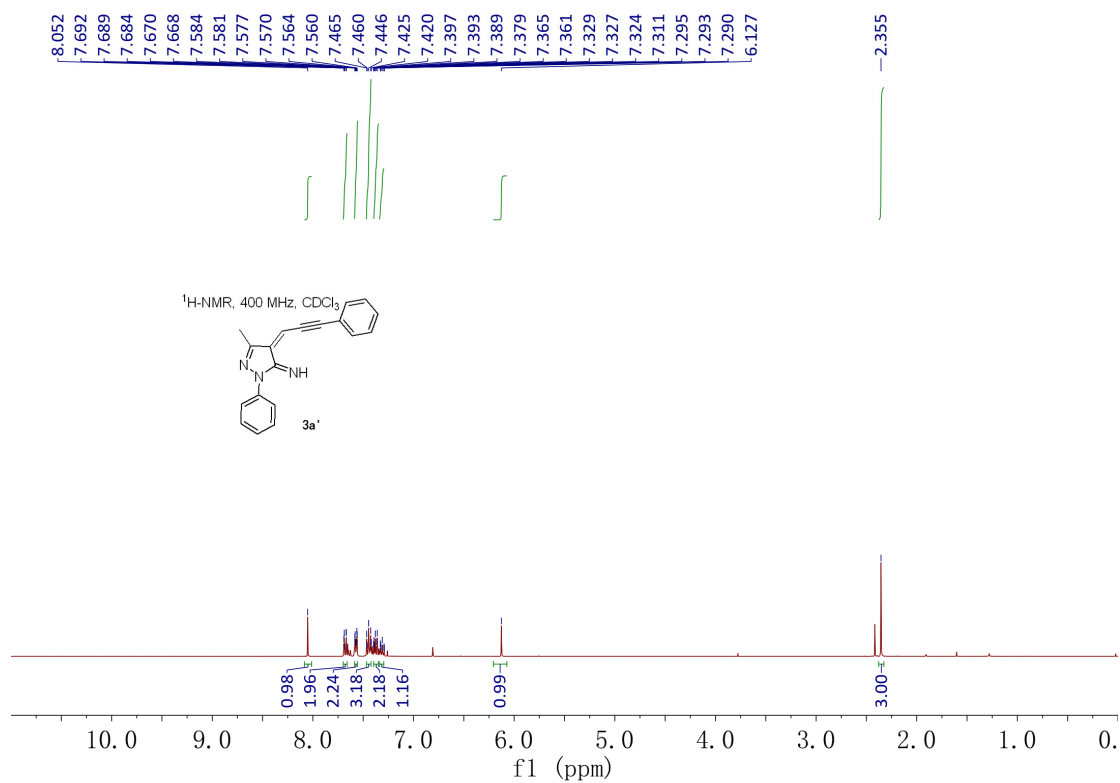

**Figure S3.** The copy of <sup>1</sup>H NMR spectra of product **3a'**.

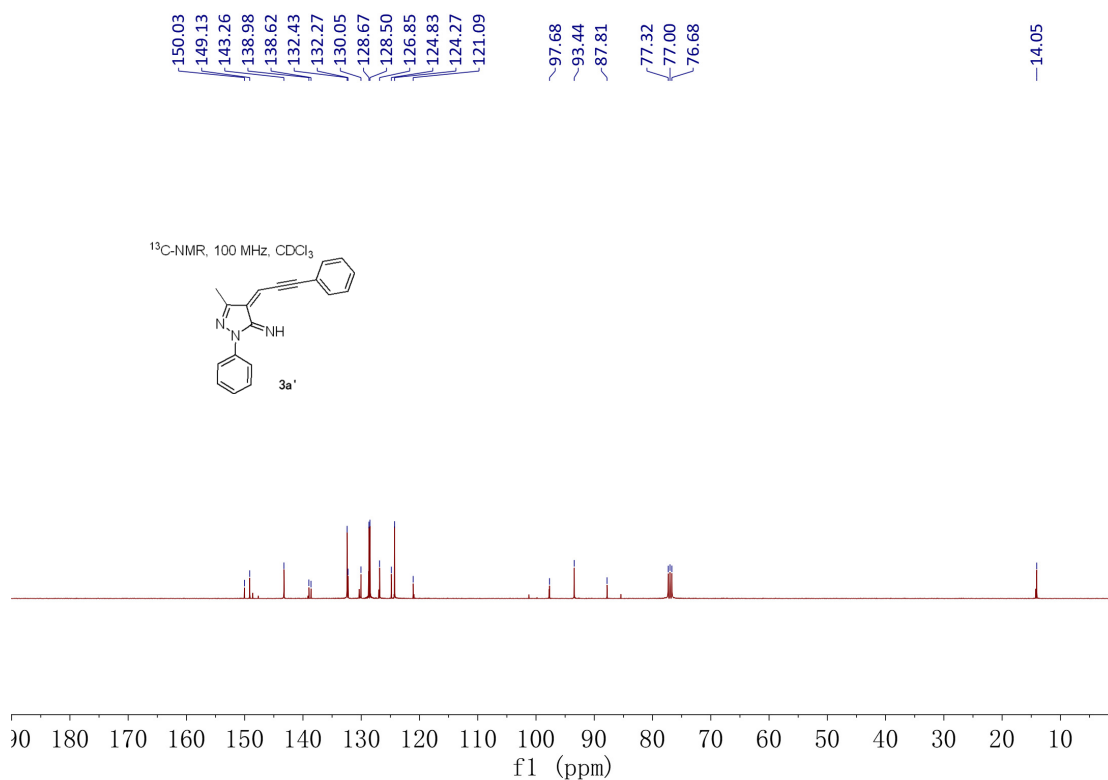

**Figure S4.** The copy of <sup>13</sup>C NMR spectra of product **3a'**.

In order to prove the regioselectivity of our method, we chosen cinnamaldehyde (**2a'**) as a substrate to react with **1a** under the standard conditions (Scheme S2). Compared with a standard simple, the 3-methyl-1,4-diphenyl-1*H*-pyrazolo[3,4-*b*]pyridine (**17**) was obtained in 45% yield (NMR see Figure S5-S6).

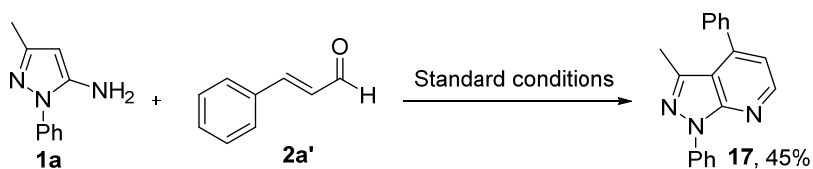

**Scheme S2.** Control experiment for the reaction of **1a** with **2a'**.

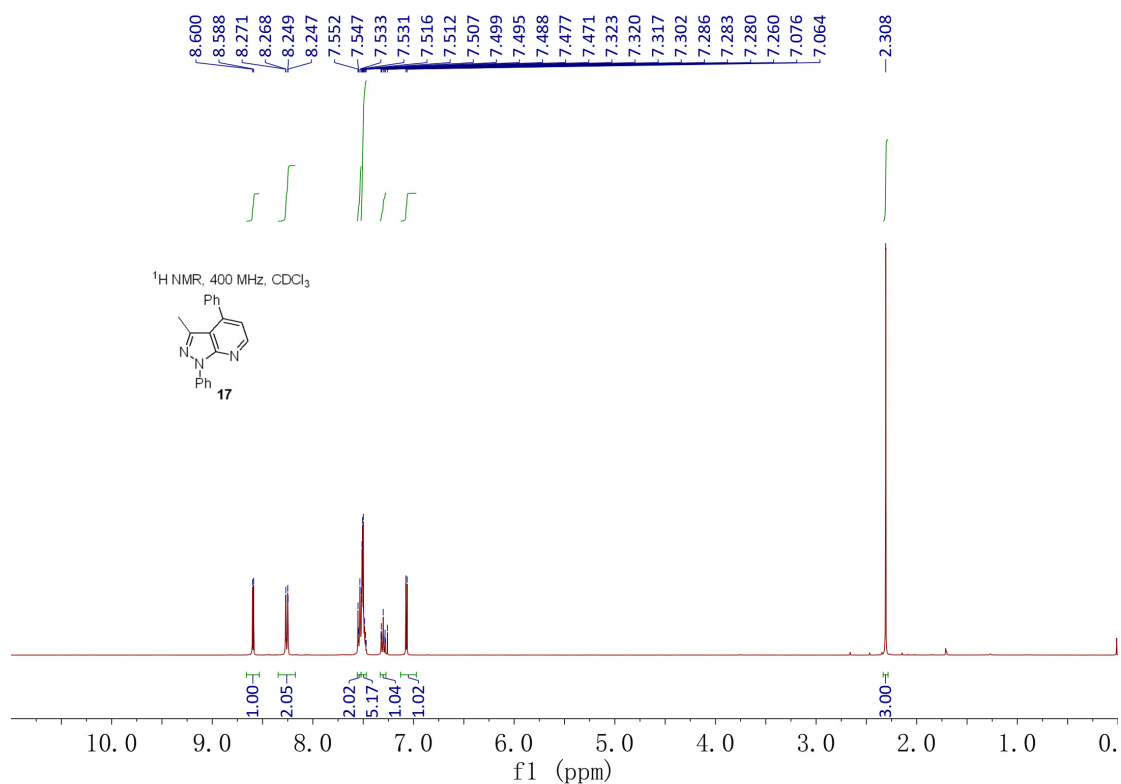

**Figure S5.** The copy of <sup>1</sup>H NMR spectra of product **17**.

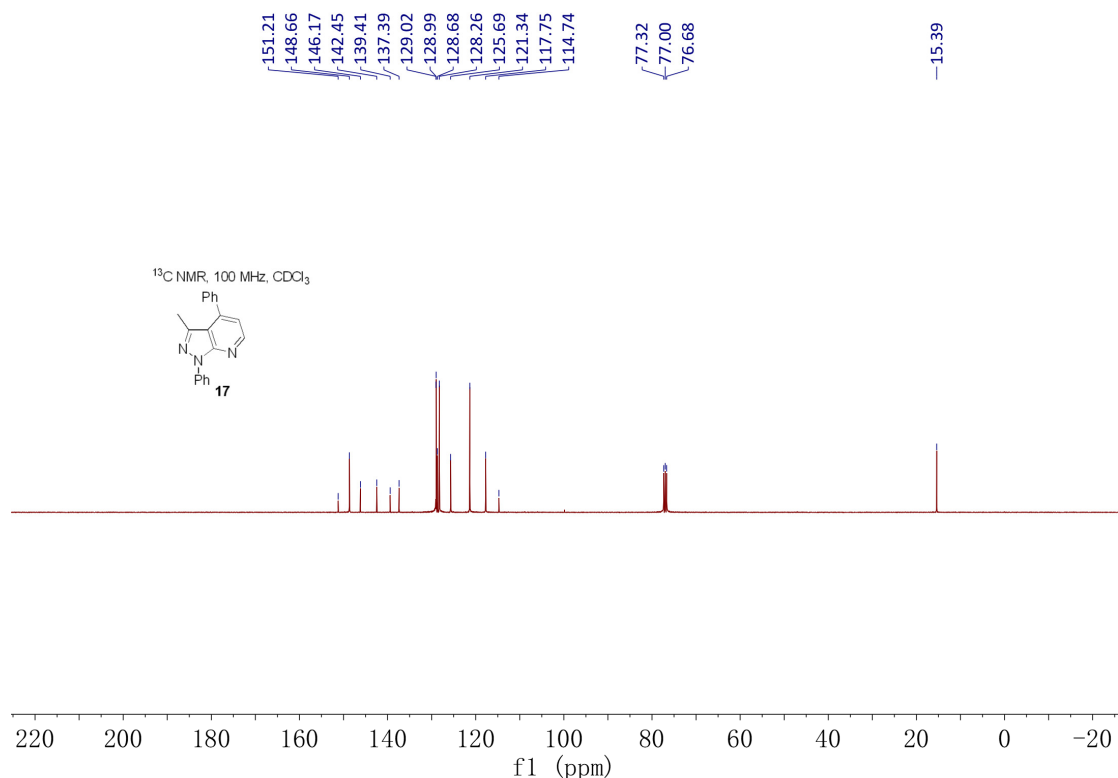

**Figure S6.** The copy of <sup>13</sup>C NMR spectra of product **17**.

## 2.2 The LC-HRMS results

In order to further confirm the potential intermediate 5-methyl-2-phenyl-4-(3-phenylprop-2-yn-1-ylidene)-2,4-dihydro-3*H*-pyrazol-3-imine

(**3a'**) in the reaction. The reaction of **1a** with **2a** was conducted under the standard conditions without acid for 1 h, then analysis the reaction mixture by LC-HRMS. Through compared the standard sample, the intermediate **3a** could be observed and confirmed (See Figure S7-S11 and Table S1).

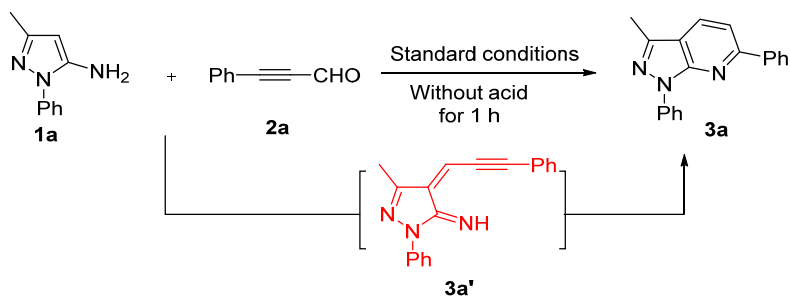

**Scheme S3.** Control experiment for the reaction of **1a** with **2a**.

#### HPLC conditions:

WATERS e2695

Chromatographic column: Agilent-TC-C18 (250 mm×4.6 mm, 5μm)

Flow rate: 1ml/min

Flow phase: MeOH: H<sub>2</sub>O (with 0.1% HCO<sub>2</sub>H),

0-3.5 min: 75:25; 3.5-4.0 min: 85:15; 4.0-20.0 min: 85:15

Wavelength: 254 nm

#### LC-MS:

LC conditions:

Thermo Scientific

Chromatographic column: Waters, ACQUITY UPLC BEH C18 column (2.1×50 mm, 1.7 μm)

Flow rate: 0.4 ml/min

Flow phase: MeOH: 0.1% HCO<sub>2</sub>H (75: 25)

MS conditions: Thermo Scientific, Q-Exactive

Mass Spectrometry Scanning Mode: cations MS

Ion source: ESI

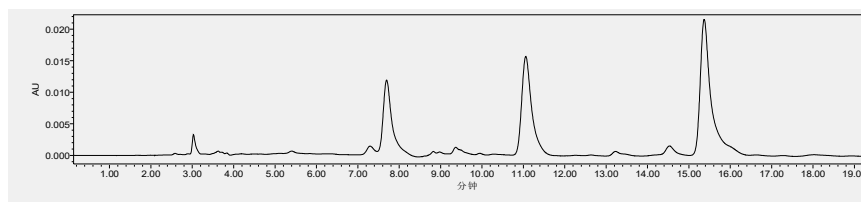

**Figure S7.** The chromatography results for the reaction mixture.

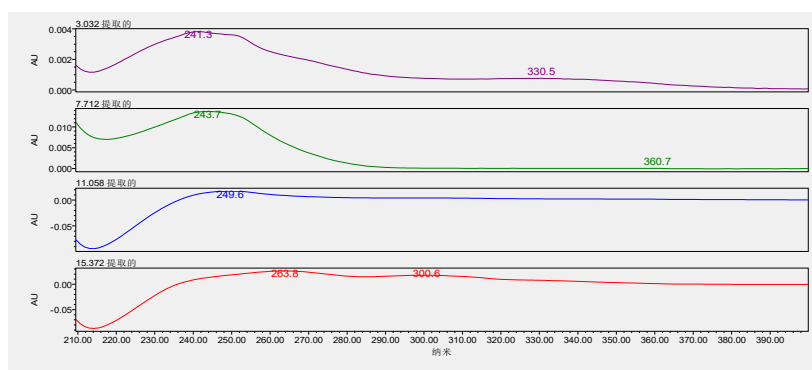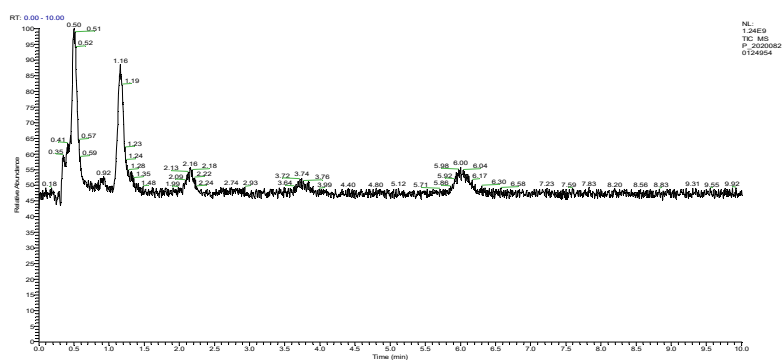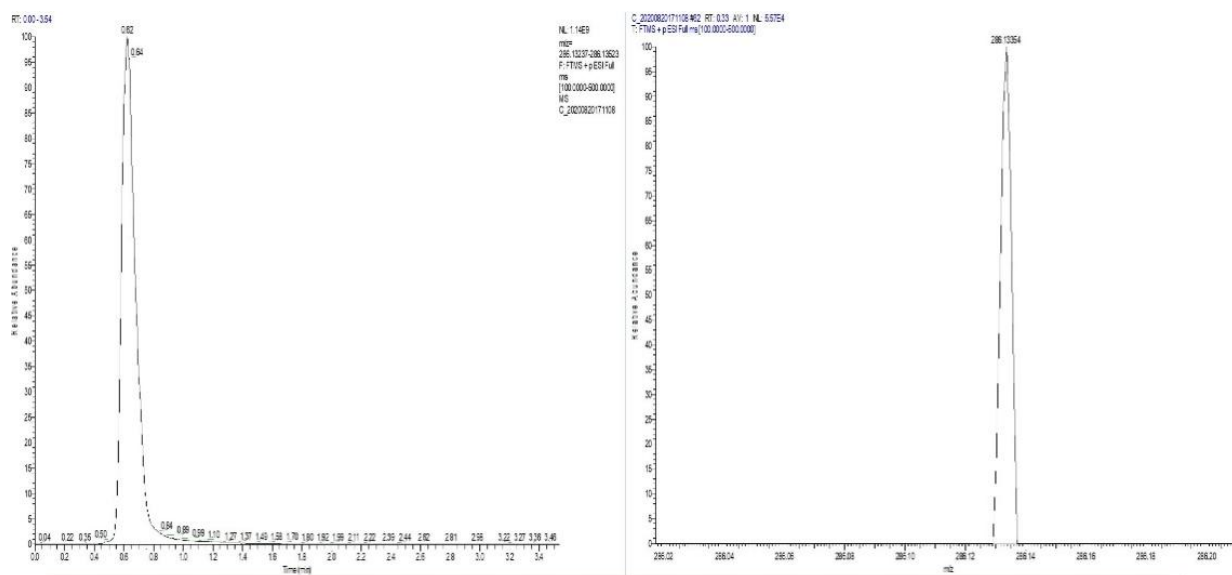

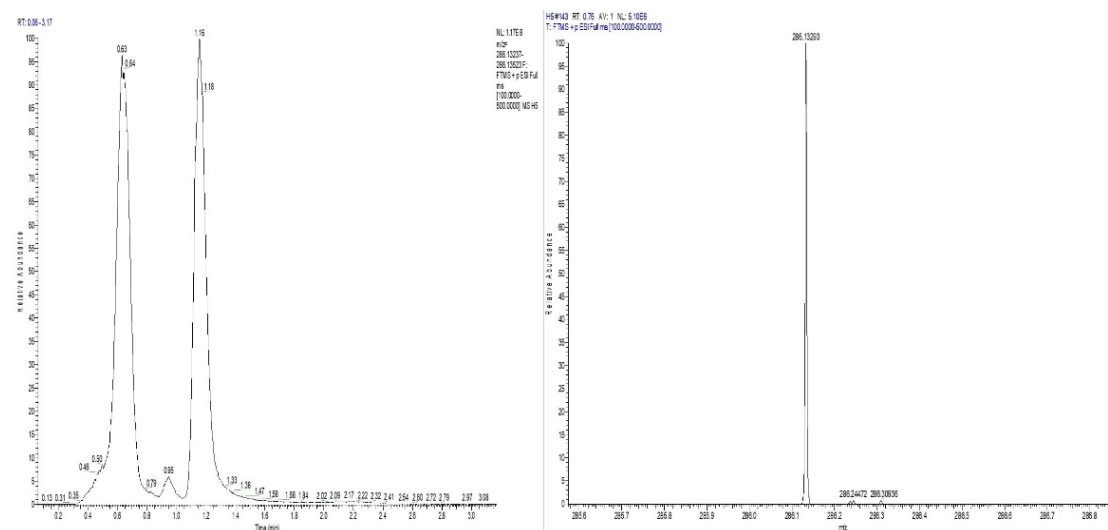

**Figure S11.** The information for intermediate **3a'** in the reaction mixture. (a) extracted ion chromatography for **3a'** (from the reaction mixture) , 0.63min; (b) The HRMS result for **3a'**.

**Table S1.** The summary of the LC-HRMS results.

| Simple | Retention Time<br>(LC) /min | wavelength /nm         | Retention Time<br>(MS) /min | Calcd for<br>(M+H) <sup>+</sup> | found    | Measurement<br>Error (ppm) |
|--------|-----------------------------|------------------------|-----------------------------|---------------------------------|----------|----------------------------|
| SS-1a  | 3.549                       | 240.1                  | 0.36                        | 174.1026                        | 174.1022 | -2.320                     |
| RM-1a  | 3.032                       | 241.3                  | 0.5                         |                                 | 174.1021 | -3.009                     |
| SS-2a  | 4.47                        | 237.8                  | 0.43                        |                                 | 131.0490 | -1.461                     |
| RM-2a  | -                           | -                      | 0.53                        | 131.0491                        | 131.0489 | -1.690                     |
| SS-3a' | 6.997                       | 336.5                  | 0.62                        | 286.1339                        | 286.1335 | -1.168                     |
| RM-3a' | -                           | -                      | 0.63                        |                                 | 286.1329 | -3.299                     |
| SS-3a  | 11.924                      | 234.2; 263.8;<br>300.6 | 1.16                        | 286.1339                        | 286.1335 | -1.482                     |
| RM-3a  | 15.372                      | 263.8; 300.6           | 1.16                        |                                 | 286.1330 | -3.055                     |

SS: Standard Sample, RM: Reaction Mixture

## 2.3 Molecular structure and crystallographic data

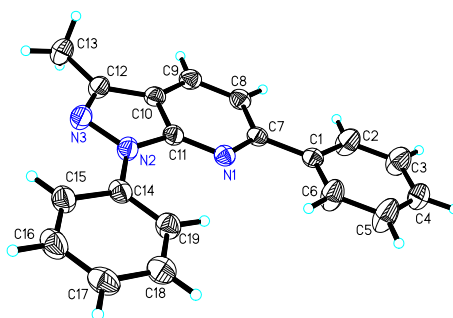

**Figure S12.** X-ray crystal structure of compound **3a**

**Table S2. Crystal data and structure refinement for compound 3a.**

|                                             |                                                               |
|---------------------------------------------|---------------------------------------------------------------|
| Identification code                         | CCDC: 2075351                                                 |
| Empirical formula                           | C <sub>19</sub> H <sub>15</sub> N <sub>3</sub>                |
| Formula weight                              | 285.34                                                        |
| Temperature/K                               | 296(2)                                                        |
| Crystal system                              | orthorhombic                                                  |
| Space group                                 | Fdd2                                                          |
| a/Å                                         | 24.743(8)                                                     |
| b/Å                                         | 45.272(14)                                                    |
| c/Å                                         | 5.2644(16)                                                    |
| $\alpha$ /°                                 | 90                                                            |
| $\beta$ /°                                  | 90                                                            |
| $\gamma$ /°                                 | 90                                                            |
| Volume/Å <sup>3</sup>                       | 5897(3)                                                       |
| Z                                           | 16                                                            |
| $\rho_{\text{calc}}/\text{cm}^3$            | 1.286                                                         |
| $\mu/\text{mm}^{-1}$                        | 0.078                                                         |
| F(000)                                      | 2400.0                                                        |
| Crystal size/mm <sup>3</sup>                | 0.12 × 0.1 × 0.1                                              |
| Radiation                                   | MoK $\alpha$ ( $\lambda$ = 0.71073)                           |
| 2 $\theta$ range for data collection/       | 3.598 to 49.312                                               |
| Index ranges                                | -28 ≤ h ≤ 26, -52 ≤ k ≤ 52, -6 ≤ l ≤ 6                        |
| Reflections collected                       | 9715                                                          |
| Independent reflections                     | 2477 [R <sub>int</sub> = 0.0300, R <sub>sigma</sub> = 0.0292] |
| Data/restraints/parameters                  | 2477/1/200                                                    |
| Goodness-of-fit on F <sup>2</sup>           | 1.046                                                         |
| Final R indexes [I ≥ 2 $\sigma$ (I)]        | R1 = 0.0376, wR = 0.0961                                      |
| Final R indexes [all data]                  | R1 = 0.0456, wR2 = 0.1024                                     |
| Largest diff. peak/hole / e Å <sup>-3</sup> | 0.12/-0.15                                                    |
| Flack parameter                             | -2.1(10)                                                      |

### 3. Experimental Procedures

#### 3.1 Reaction Optimization

We optimized the reaction conditions using 3-methyl-1-phenyl-1*H*-pyrazol-5-amine (**1a**) and 3-phenylpropionaldehyde (**2a**) as model substrates. Initially, the reaction was carried out with various metal catalysts (10 mol%), such as Cu(OAc)<sub>2</sub>, CuCl, CuBr, Cu(OTf)<sub>2</sub>, CuO, FeCl<sub>3</sub>, Pd(OAc)<sub>2</sub>, PdCl<sub>2</sub>, and AgOAc (Table S3, entries 1-9). When the reaction was performed with AgOAc as the catalyst (Table S3, entry 9), the reaction worked well to afford the desired product **3a** in 43% yield. Next, a series of silver catalysts were screened under the selected conditions (Table S3, entries 9-13). When AgCF<sub>3</sub>CO<sub>2</sub> was employed as the catalyst, the yield was increased to 56% (Table S3, entry 13). Thus, AgCF<sub>3</sub>CO<sub>2</sub> was chosen as the catalyst for further studies.

**Table S3.** Optimization for the metal catalysts of reaction. <sup>a</sup>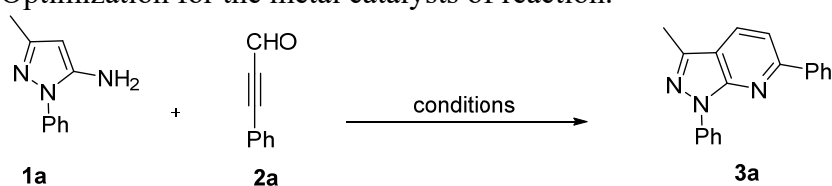

| Entry     | Cat.                                  | Solvent     | T(°C)      | Yield(%) <sup>b</sup> |
|-----------|---------------------------------------|-------------|------------|-----------------------|
| 1         | Cu(OAc) <sub>2</sub>                  | DMAc        | 100        | 23                    |
| 2         | CuCl                                  | DMAc        | 100        | 30                    |
| 3         | CuBr <sub>2</sub>                     | DMAc        | 100        | 33                    |
| 4         | Cu(OTf) <sub>2</sub>                  | DMAc        | 100        | 35                    |
| 5         | CuO                                   | DMAc        | 100        | N.D. <sup>c</sup>     |
| 6         | FeCl <sub>3</sub>                     | DMAc        | 100        | 30                    |
| 7         | Pd(OAc) <sub>2</sub>                  | DMAc        | 100        | N.D. <sup>c</sup>     |
| 8         | PdCl <sub>2</sub>                     | DMAc        | 100        | 12                    |
| 9         | AgOAc                                 | DMAc        | 100        | 43                    |
| 10        | Ag <sub>2</sub> SO <sub>4</sub>       | DMAc        | 100        | 20                    |
| 11        | AgBF <sub>4</sub>                     | DMAc        | 100        | 35                    |
| 12        | Ag <sub>2</sub> CO <sub>3</sub>       | DMAc        | 100        | 40                    |
| <b>13</b> | <b>AgCF<sub>3</sub>CO<sub>2</sub></b> | <b>DMAc</b> | <b>100</b> | <b>56</b>             |

<sup>a</sup> Reaction conditions: **1a** (0.2 mmol), **2a** (0.2 mmol), cat. (10 mol%), solvent (1.5 mL), at 100 °C for 2 h under air atmosphere. <sup>b</sup> Isolated yield. <sup>c</sup> N.D.=not detected

After a systematic screening of silver salts, a serial of acids, such as TFA, TfOH, HCl, TsOH, HOAc, and TfOH were then examined (Table S4, entries 2-6). The results showed that TfOH was the most suitable choice, delivering **3a** in 84% yield (Table S4, entry 3).

**Table S4.** Optimization for the acid of reaction. <sup>a</sup>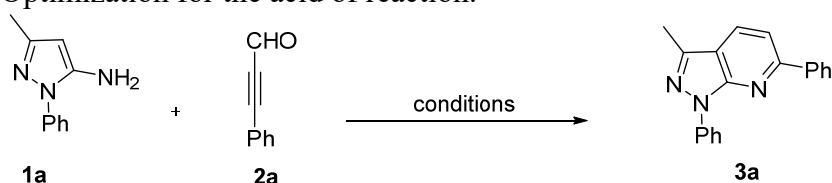

| Entry    | Cat.                                  | Acid        | Solvent     | T(°C)      | Yield(%) <sup>b</sup> |
|----------|---------------------------------------|-------------|-------------|------------|-----------------------|
| 1        | AgCF <sub>3</sub> CO <sub>2</sub>     |             | DMAc        | 100        | 56                    |
| 2        | AgCF <sub>3</sub> CO <sub>2</sub>     | TFA         | DMAc        | 100        | 70                    |
| <b>3</b> | <b>AgCF<sub>3</sub>CO<sub>2</sub></b> | <b>TfOH</b> | <b>DMAc</b> | <b>100</b> | <b>84</b>             |
| 4        | AgCF <sub>3</sub> CO <sub>2</sub>     | HCl         | DMAc        | 100        | 67                    |
| 5        | AgCF <sub>3</sub> CO <sub>2</sub>     | TsOH        | DMAc        | 100        | 53                    |
| 6        | AgCF <sub>3</sub> CO <sub>2</sub>     | HOAc        | DMAc        | 100        | 49                    |

<sup>a</sup> Reaction conditions: **1a** (0.2 mmol), **2a** (0.2 mmol), cat. (10 mol%), acid (30 mol%), solvent (1.5 mL), at 100 °C for 2 h under air atmosphere. <sup>b</sup> Isolated yield.

The reaction solvent was also examined, such as DMSO, MeCN, DMF, toluene, PhCl, THF, dioxane, and DCE (Table S5, entries 1-9). The desired product **3a** was obtained in 45% to 66% yields. The results showed DMAc was the best solvent (Table S5,

entry 1).

**Table S5.** Optimization for the solvent of reaction. <sup>a</sup>

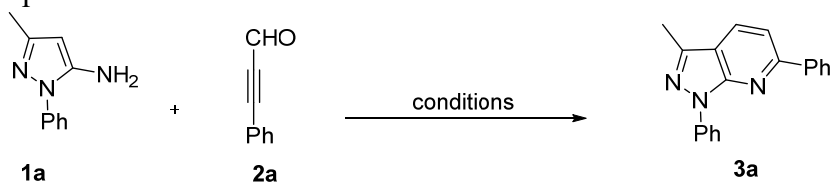

| Entry    | Cat.                                  | Acid        | Solvent     | T(°C)      | Yield(%) <sup>b</sup> |
|----------|---------------------------------------|-------------|-------------|------------|-----------------------|
| <b>1</b> | <b>AgCF<sub>3</sub>CO<sub>2</sub></b> | <b>TfOH</b> | <b>DMAc</b> | <b>100</b> | <b>84</b>             |
| 2        | AgCF <sub>3</sub> CO <sub>2</sub>     | TfOH        | DMSO        | 100        | 58                    |
| 3        | AgCF <sub>3</sub> CO <sub>2</sub>     | TfOH        | MeCN        | 100        | 53                    |
| 4        | AgCF <sub>3</sub> CO <sub>2</sub>     | TfOH        | DMF         | 100        | 60                    |
| 5        | AgCF <sub>3</sub> CO <sub>2</sub>     | TfOH        | Toluene     | 100        | 66                    |
| 6        | AgCF <sub>3</sub> CO <sub>2</sub>     | TfOH        | PhCl        | 100        | 34                    |
| 7        | AgCF <sub>3</sub> CO <sub>2</sub>     | TfOH        | THF         | 100        | 56                    |
| 8        | AgCF <sub>3</sub> CO <sub>2</sub>     | TfOH        | Dioxane     | 100        | 60                    |
| 9        | AgCF <sub>3</sub> CO <sub>2</sub>     | TfOH        | DCE         | 100        | 45                    |

<sup>a</sup> Reaction conditions: **1a** (0.2 mmol), **2a** (0.2 mmol), cat. (10 mol%), acid (30 mol%), solvent (1.5 mL), at 100 °C for 2 h under air atmosphere. <sup>b</sup> Isolated yield.

Besides, the reaction temperature was also screened and 100 °C was found to be the best temperature (Table S6, entries 1-5).

**Table S6.** Optimization for the temperature of reaction. <sup>a</sup>

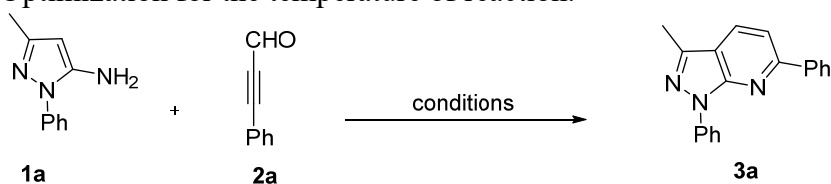

| Entry    | Cat.                                  | Acid        | Solvent     | T(°C)      | Yield(%) <sup>b</sup> |
|----------|---------------------------------------|-------------|-------------|------------|-----------------------|
| 1        | AgCF <sub>3</sub> CO <sub>2</sub>     | TfOH        | DMAc        | 60         | 60                    |
| 2        | AgCF <sub>3</sub> CO <sub>2</sub>     | TfOH        | DMAc        | 80         | 69                    |
| <b>3</b> | <b>AgCF<sub>3</sub>CO<sub>2</sub></b> | <b>TfOH</b> | <b>DMAc</b> | <b>100</b> | <b>84</b>             |
| 4        | AgCF <sub>3</sub> CO <sub>2</sub>     | TfOH        | DMAc        | 110        | 76                    |
| 5        | AgCF <sub>3</sub> CO <sub>2</sub>     | TfOH        | DMAc        | 120        | 70                    |

<sup>a</sup> Reaction conditions: **1a** (0.2 mmol), **2a** (0.2 mmol), cat. (10 mol%), acid (30 mol%), solvent (1.5 mL), at different temperature for 2 h under air atmosphere. <sup>b</sup> Isolated yield.

**Table S7.** Optimization of the iodine-functionalized product. <sup>a</sup>

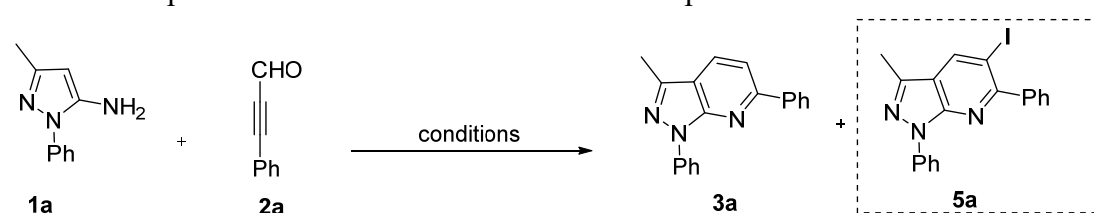

| Entry | I source (eq.) | Acid (eq.) | Solvent | T (°C) | Yield (%) <sup>c</sup> |    |
|-------|----------------|------------|---------|--------|------------------------|----|
|       |                |            |         |        | 3a                     | 5a |

|                |                            |                   |             |            |              |                   |
|----------------|----------------------------|-------------------|-------------|------------|--------------|-------------------|
| 1 <sup>b</sup> | I <sub>2</sub> (1.0)       | TfOH (0.3)        | DMAc        | 100        | 46           | 30                |
| 2              | I <sub>2</sub> (1.0)       | TfOH (0.3)        | DMAc        | 100        | 20           | 46                |
| 3              | TBAI (1.0)                 | TfOH (0.3)        | DMAc        | 100        | 22           | 34                |
| 4              | NIS (1.0)                  | TfOH (0.3)        | DMAc        | 100        | 30           | 40                |
| 5              | NaI (1.0)                  | TfOH (0.3)        | DMAc        | 100        | 26           | 43                |
| 6              | KI (1.0)                   | TfOH (0.3)        | DMAc        | 100        | 24           | 42                |
| 7              | NH <sub>4</sub> I (1.0)    | TfOH (0.3)        | DMAc        | 100        | 30           | 33                |
| 8              | I <sub>2</sub> (1.5)       | TfOH (0.3)        | DMAc        | 100        | 20           | 50                |
| 9              | I <sub>2</sub> (2.0)       | TfOH (0.3)        | DMAc        | 100        | 15           | 55                |
| 10             | I <sub>2</sub> (2.0)       | TfOH (0.5)        | DMAc        | 100        | 15           | 58                |
| 11             | I <sub>2</sub> (2.0)       | TfOH (1.0)        | DMAc        | 100        | 10           | 60                |
| <b>12</b>      | <b>I<sub>2</sub> (2.0)</b> | <b>TfOH (1.0)</b> | <b>DMSO</b> | <b>100</b> | <b>&lt;5</b> | <b>68</b>         |
| 13             | I <sub>2</sub> (2.0)       | TfOH (1.0)        | DMF         | 100        | 23           | 50                |
| 14             | I <sub>2</sub> (2.0)       | TfOH (1.0)        | DCE         | 100        | 20           | 40                |
| 15             | I <sub>2</sub> (2.0)       | TfOH (1.0)        | MeCN        | 100        | 30           | 44                |
| 16             | I <sub>2</sub> (2.0)       | TfOH (1.0)        | Dioxane     | 100        | 33           | 43                |
| 17             | I <sub>2</sub> (2.0)       | TfOH (1.0)        | Toluene     | 100        | 37           | 42                |
| 18             | I <sub>2</sub> (2.0)       | TfOH (1.0)        | NMP         | 100        | 33           | 40                |
| 19             | I <sub>2</sub> (2.0)       | TfOH (1.0)        | DMSO        | 90         | 25           | 50                |
| 20             | I <sub>2</sub> (2.0)       | TfOH (1.0)        | DMSO        | 80         | 30           | 45                |
| 21             | I <sub>2</sub> (2.0)       | TfOH (1.0)        | DMSO        | 70         | 35           | 22                |
| 22             | I <sub>2</sub> (2.0)       | TfOH (1.0)        | DMSO        | 60         | 30           | N.D. <sup>d</sup> |

<sup>a</sup> Reaction conditions: **1a** (0.2 mmol), **2a** (0.2 mmol), I source, acid, solvent (2.0 mL), at shown temperature for 6 h under air atmosphere. <sup>b</sup> 10 mol% AgCF<sub>3</sub>CO<sub>2</sub> was added <sup>c</sup> Isolated yield. <sup>d</sup> N.D. = not detected

We chose 3-methyl-1-phenyl-1*H*-pyrazol-5-amine (**1a**) and 3-phenylpropionaldehyde (**2a**) as the model substrates for the optimization of the condition. Firstly, a series of iodine sources were screened under the selected conditions, including I<sub>2</sub>, TBAI, NIS, NaI, KI and NH<sub>4</sub>I (Table S7 entries 1-7). When I<sub>2</sub> was employed iodine source, the yield of **5a** was increased to 46% (Table S7, entry 2). Next, the amount of I<sub>2</sub> was examined and the results showed that 2.0 equivalent of I<sub>2</sub> provided **5a** in 60% yield (Table S7, entries 8-9). After screening the iodine sources, we turned our attention to selecting the amount of TfOH, the results showed that 1.0 equivalent of TfOH was the best choice, providing **5a** in 60% yield (Table S7, entries 9-12). Then, the reaction solvent was examined, such as DMSO, DMF, DCE, MeCN, dioxane, toluene and NMP (Table S7, entries 12-18). The results showed DMSO was the best solvent (Table 1, entry 12). Finally, the effect of reaction temperature was also screened. The experiment results showed that 100 °C was the best reaction temperature, giving the desired product **5a** in 68% yield (Table S7, entries 19-22).

**Table S8.** Optimization of the bromine-functionalized product. <sup>a,b</sup>

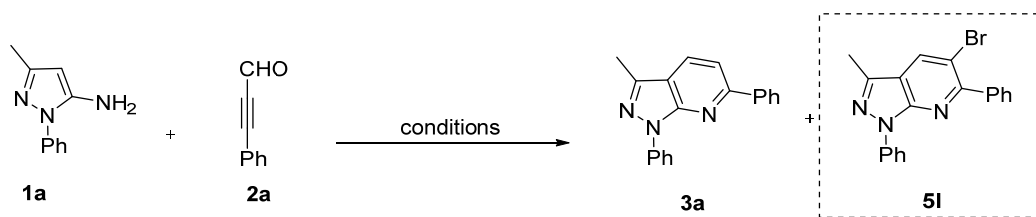

| Entry | Br source (eq.) | Acid (eq.) | Solvent | T (°C) | Yield (%) <sup>b</sup> |    |
|-------|-----------------|------------|---------|--------|------------------------|----|
|       |                 |            |         |        | 3a                     | 5l |
| 1     | NBS (2.0)       | TfOH (1.0) | DMSO    | 100    | trace                  | 66 |
| 2     | NBA (2.0)       | TfOH (1.0) | DMSO    | 100    | 22                     | 42 |
| 3     | NBP (2.0)       | TfOH (1.0) | DMSO    | 100    | 25                     | 38 |
| 4     | DBDMH (2.0)     | TfOH (1.0) | DMSO    | 100    | 15                     | 43 |

<sup>a</sup> Reaction conditions: **1a** (0.2 mmol), **2a** (0.2 mmol), Br source, acid, solvent (1.5 mL), at shown temperature for 6 h under air atmosphere. <sup>b</sup> Isolated yield. <sup>c</sup> NBA = *N*-Bromoacetamide. <sup>d</sup> NBP = *N*-(Bromomethyl)phthalimide. <sup>e</sup> DBDMH = 1,3-Dibromo-5,5-dimethylhydantoin.

The bromine sources also were screened, when NBS was used as external bromine source, giving the expected product **5l** in 66% yield (Table S8, entries 1-4).

### 3.2 Synthesis of 6, 8, 10 (adapted from literature) [50]

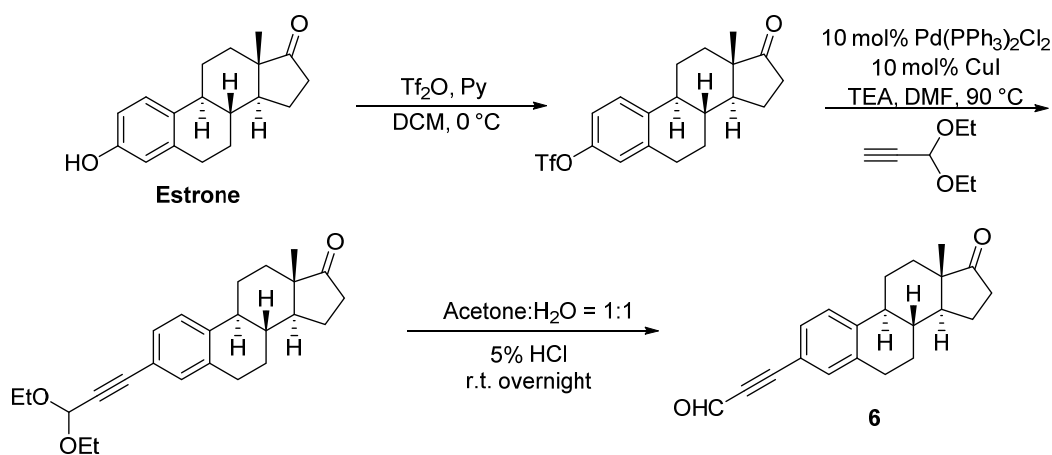

**Scheme S4.** Synthesis of **6** via Sonogashira coupling reaction and acetal hydrolysis reaction

**Step 1:** Estrone (1.0 equiv., 5 mmol) and pyridine (2.0 equiv., 10.0 mmol) was sequentially dissolved in 20 mL of dry DCM, following by dropwise addition of  $\text{ Tf}_2\text{O}$  (1.2 equiv., 6.0 mmol) in 10 mL of dry DCM at 0 °C. After that, the mixture was warmed to rt, and stirred overnight. When the reaction completed, 10% HCl was added to the solution to quench the reaction, and then the mixture was extracted with DCM. The organic layer was washed with saturated  $\text{NaHCO}_3$  and saturated brine, dried over anhydrous  $\text{Na}_2\text{SO}_4$ , filtered and concentrated in vacuo. Purification of the residue by column chromatography on silica gel gave the corresponding trifluoromethanesulfonate as a white solid.

**Step 2:** A mixture of trifluoromethanesulfonate (1.0 equiv., 4.5 mmol), 3,3-diethoxyprop-1-yne (1.25 equiv., 5.6 mmol), triethylamine (3.0 mL), and  $\text{Pd(PPh}_3)_2\text{Cl}_2$  (10 mol%, 0.45 mmol),  $\text{CuI}$  (10 mol%, 0.45 mmol) was dissolved in 15

mL of DMF and stirred at 90 °C for 4 h under Ar. The reaction mixture was diluted with water (150 mL) and extracted with EtOAc (3 × 50 mL), the combined organic layers were washed with brine for three times (3 × 30 mL), dried by Na<sub>2</sub>SO<sub>4</sub>, and filtrated. The filtrate was evaporated. Chromatography of the residue on silica gel provided the corresponding product acetal.

**Step 3:** Acetal (1.0 equiv., 4.0 mmol) was dissolved in mixed solvents (20 mL) of acetone and H<sub>2</sub>O (v:v = 1:1), then 5 equivalents of 5% HCl (12 mL, 20 mmol) was added to the solution, and the mixture was allowed to react overnight at room temperature. Upon completion of the reaction, acetone was removed under reduced pressure, after that the aqueous layer was extracted with DCM (3 × 20 mL), the combined organic layers were dried over anhydrous Na<sub>2</sub>SO<sub>4</sub>, and concentrated in vacuo. Purification of the residue by column chromatography gave **6** in overall 54% yield from Estrone. The experimental data of **6** match with those reported in the literature.<sup>[1]</sup>

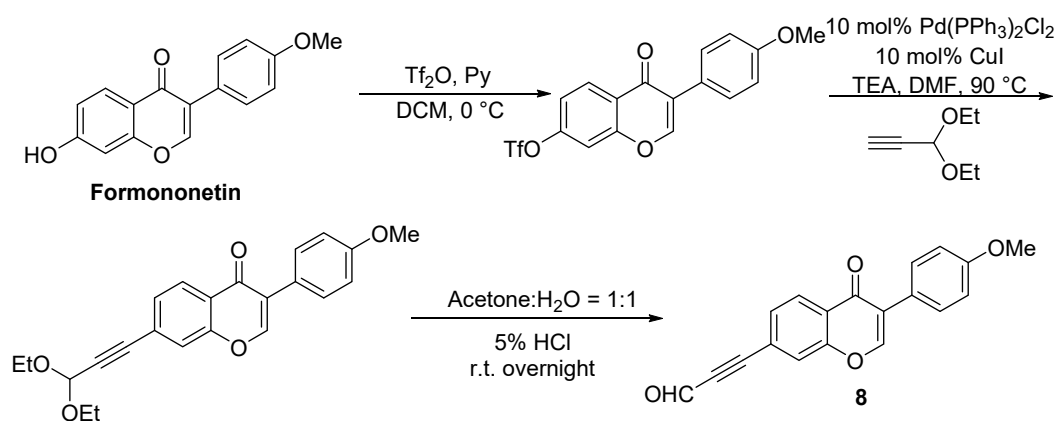

**Scheme S5.** Synthesis of **8** via Sonogashira coupling reaction and acetal hydrolysis reaction

**Step 1:** Formononetin (1.0 equiv., 5 mmol) and pyridine (2.0 equiv., 10.0 mmol) was sequentially dissolved in 20 mL of dry DCM, following by dropwise addition of Tf<sub>2</sub>O (1.2 equiv., 6.0 mmol) in 10 mL of dry DCM at 0 °C. After that, the mixture was warmed to rt, and stirred overnight. When the reaction completed, 10% HCl was added to the solution to quench the reaction, and then the mixture was extracted with DCM. The organic layer was washed with saturated NaHCO<sub>3</sub> and saturated brine, dried over anhydrous Na<sub>2</sub>SO<sub>4</sub>, filtered and concentrated in vacuo. Purification of the residue by column chromatography on silica gel gave the corresponding trifluoromethanesulfonate as a yellow solid.

**Step 2:** A mixture of trifluoromethanesulfonate (1.0 equiv., 4.5 mmol), 3,3-diethoxyprop-1-yne (1.25 equiv., 5.6 mmol), triethylamine (3.0 mL), and Pd(PPh<sub>3</sub>)<sub>2</sub>Cl<sub>2</sub> (10 mol%, 0.45 mmol), CuI (10 mol%, 0.45 mmol) was dissolved in 15 mL of DMF and stirred at 90 °C for 4 h under Ar. The reaction mixture was diluted with water (150 mL) and extracted with EtOAc (3 × 50 mL), the combined organic layers were washed with brine for three times (3 × 30 mL), dried by Na<sub>2</sub>SO<sub>4</sub>, and

filtrated. The filtrate was evaporated. Chromatography of the residue on silica gel provided the corresponding product acetal.

**Step 3:** Acetal (1.0 equiv., 4.04 mmol) was dissolved in mixed solvents (20 mL) of acetone and H<sub>2</sub>O (*v:v* = 1:1), then 5 equivalents of 5% HCl (12 mL, 20 mmol) was added to the solution, and the mixture was allowed to react overnight at room temperature. Upon completion of the reaction, acetone was removed under reduced pressure, after that the aqueous layer was extracted with DCM (3 × 20 mL), the combined organic layers were dried over anhydrous Na<sub>2</sub>SO<sub>4</sub>, and concentrated in vacuo. Purification of the residue by column chromatography gave **8** in overall 56% yield from formononetin.

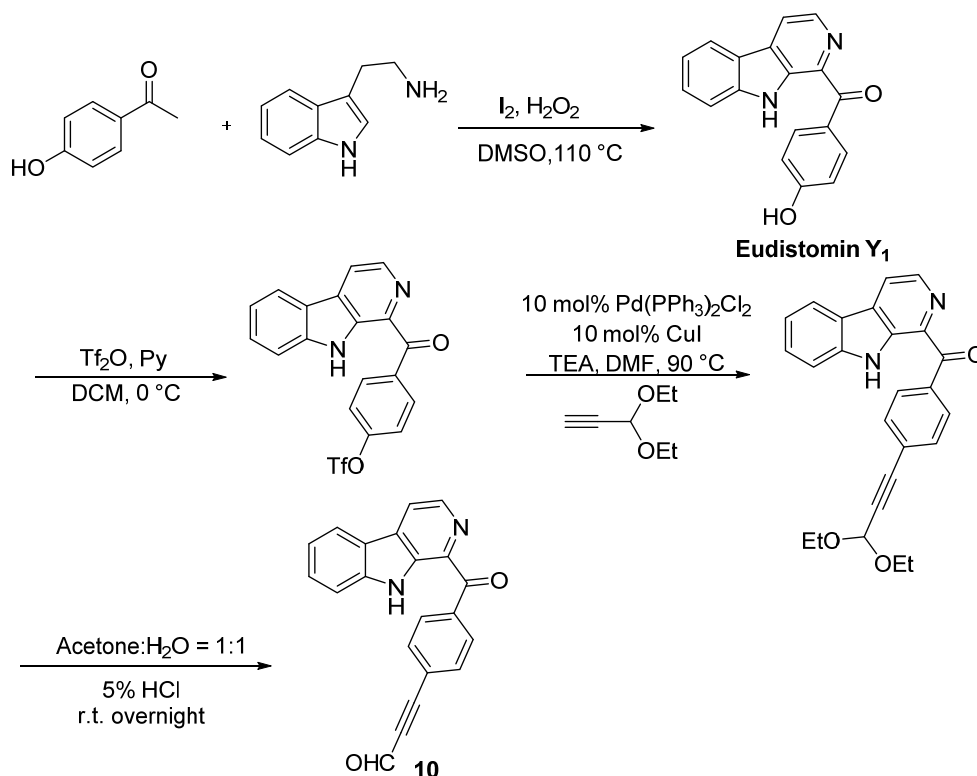

**Scheme S6.** Synthesis of **10** via tandem cyclization protocol, Sonogashira coupling reaction and acetal hydrolysis reaction

**Step 1:** Adapting a literature procedure [51], hydrogen peroxide (30% aqueous solution, 1.5 equiv.) was added to a mixture of acetophenone (1.0 equiv., 1 mmol), tryptamine (1.0 equiv., 1 mmol), and I<sub>2</sub> (0.8 equiv., 0.8 mmol) in DMSO (5 mL) at room temperature. The resulting mixture was stirred at 110 °C for 5 h during which it was monitored by TLC analysis. The solution was then cooled to RT, diluted with water (50 mL), and extracted with EtOAc three times (3 × 50 mL). The extract was washed with 10% Na<sub>2</sub>S<sub>2</sub>O<sub>3</sub> solution, dried over a hydrous Na<sub>2</sub>SO<sub>4</sub>, and concentrated under reduced pressure. The residue was purified by column chromatography on silica gel to afford the desired product eudistomin Y<sub>1</sub> as a yellow solid.

**Step 2:** Eudistomin Y<sub>1</sub> (1.0 equiv., 5 mmol) and pyridine (2.0 equiv., 10.0 mmol) was sequentially dissolved in 20 mL of dry DCM, following by dropwise addition of Tf<sub>2</sub>O (1.2 equiv., 6.0 mmol) in 10 mL of dry DCM at 0 °C. After that, the mixture was warmed to rt, and stirred overnight. When the reaction completed, 10% HCl was

added to the solution to quench the reaction, and then the mixture was extracted with DCM. The organic layer was washed with saturated NaHCO<sub>3</sub> and saturated brine, dried over anhydrous Na<sub>2</sub>SO<sub>4</sub>, filtered and concentrated in vacuo. Purification of the residue by column chromatography on silica gel gave the corresponding trifluoromethanesulfonate as a yellow solid.

**Step 3:** A mixture of trifluoromethanesulfonate (1.0 equiv., 4.5 mmol), 3,3-diethoxyprop-1-yne (1.25 equiv., 5.6 mmol), triethylamine (3.0 mL), and Pd(PPh<sub>3</sub>)<sub>2</sub>Cl<sub>2</sub> (10 mol%, 0.45 mmol), CuI (10 mol%, 0.45 mmol) was dissolved in 15 mL of DMF and stirred at 90 °C for 4 h under Ar. The reaction mixture was diluted with water (150 mL) and extracted with EtOAc (3 × 50 mL), the combined organic layers were washed with brine for three times (3 × 30 mL), dried by Na<sub>2</sub>SO<sub>4</sub>, and filtrated. The filtrate was evaporated. Chromatography of the residue on silica gel provided the corresponding product acetal.

**Step 4:** Acetal (1.0 equiv., 4.0 mmol) was dissolved in mixed solvents (20 mL) of acetone and H<sub>2</sub>O (v:v = 1:1), then 5 equivalents of 5% HCl (12 mL, 20 mmol) was added to the solution, and the mixture was allowed to react overnight at room temperature. Upon completion of the reaction, acetone was removed under reduced pressure, after that the aqueous layer was extracted with DCM (3 × 20 mL), the combined organic layers were dried over anhydrous Na<sub>2</sub>SO<sub>4</sub>, and concentrated in vacuo. Purification of the residue by column chromatography gave **10** in overall 55% yield from Eudistomin Y<sub>1</sub>.

## 4. Characterization of Products

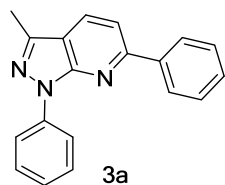

**3-Methyl-1,6-diphenyl-1H-pyrazolo[3,4-*b*]pyridine (3a)**, 48 mg, 84%, white solid, m.p. 126–127 °C. <sup>1</sup>H NMR (400 MHz, CDCl<sub>3</sub>): δ (ppm) 8.46 – 8.40 (m, 2H), 8.20 – 8.15 (m, 2H), 8.08 (d, *J* = 8.0 Hz, 1H), 7.67 (d, *J* = 8.0 Hz, 1H), 7.54 (m, 4H), 7.49 – 7.44 (m, 1H), 7.32 – 7.25 (m, 1H), 2.67 (s, 3H). <sup>13</sup>C NMR (100 MHz, CDCl<sub>3</sub>): δ (ppm) 156.7, 151.0, 142.5, 139.8, 139.2, 129.9, 129.4, 128.9, 128.7, 127.5, 125.1, 120.5, 115.8, 114.2, 12.5. HR-MS (ESI): calcd for [M+H]<sup>+</sup> C<sub>19</sub>H<sub>16</sub>N<sub>3</sub>: 286.1339; found: 286.1339. The experimental data of **3a** match with those reported in the literature[52].

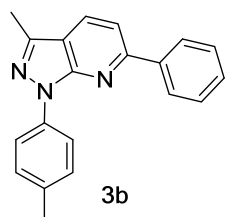

**3-Methyl-6-phenyl-1-(*p*-tolyl)-1H-pyrazolo[3,4-*b*]pyridine (3b)**, 47 mg, 78%, white solid, m.p. 132–133 °C. <sup>1</sup>H NMR (400 MHz, CDCl<sub>3</sub>): δ (ppm) 8.29 – 8.24 (m, 2H), 8.20 – 8.15 (m, 2H), 8.07 (d, *J* = 8.3 Hz, 1H), 7.66 (d, *J* = 8.4 Hz, 1H), 7.55 – 7.49 (m,

2H), 7.49 – 7.42 (m, 1H), 7.37 – 7.31 (m, 2H), 2.66 (s, 3H), 2.42 (s, 3H).  $^{13}\text{C}$  NMR (100 MHz,  $\text{CDCl}_3$ ):  $\delta$  (ppm) 156.5, 150.8, 142.1, 139.2, 137.3, 134.8, 129.8, 129.4, 129.3, 128.7, 127.5, 120.6, 115.5, 114.0, 21.0, 12.4. HR-MS (ESI): calcd for  $[\text{M}+\text{H}]^+$   $\text{C}_{20}\text{H}_{18}\text{N}_3$ : 300.1495; found: 300.1496.

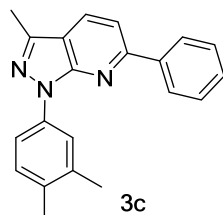

**1-(3,4-Dimethylphenyl)-3-methyl-6-phenyl-1H-pyrazolo[3,4-*b*]pyridine (3c)**, 47 mg, 75%, white solid, m.p. 152–153 °C.  $^1\text{H}$  NMR (400 MHz,  $\text{CDCl}_3$ ):  $\delta$  (ppm) 8.20 – 8.13 (m, 3H), 8.12 – 8.05 (m, 2H), 7.66 (d,  $J$  = 8.4 Hz, 1H), 7.54 – 7.49 (m, 2H), 7.48 – 7.43 (m, 1H), 7.29 (d,  $J$  = 8.0 Hz, 1H), 2.66 (s, 3H), 2.39 (s, 3H), 2.33 (s, 3H).  $^{13}\text{C}$  NMR (100 MHz,  $\text{CDCl}_3$ ):  $\delta$  (ppm) 156.5, 150.8, 142.0, 139.3, 137.5, 137.2, 133.6, 129.9, 129.8, 129.3, 128.7, 127.5, 121.9, 118.2, 115.5, 114.0, 20.0, 19.3, 12.4. HR-MS (ESI): calcd for  $[\text{M}+\text{H}]^+$   $\text{C}_{21}\text{H}_{20}\text{N}_3$ : 314.1651; found: 314.1653.

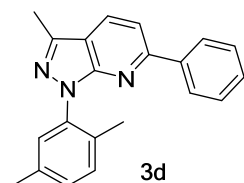

**1-(2,5-Dimethylphenyl)-3-methyl-6-phenyl-1H-pyrazolo[3,4-*b*]pyridine (3d)**, 48 mg, 77%, white solid, m.p. 154–155 °C.  $^1\text{H}$  NMR (400 MHz,  $\text{CDCl}_3$ ):  $\delta$  (ppm) 8.10 (d,  $J$  = 8.0 Hz, 1H), 8.08 – 8.05 (m, 2H), 7.64 (d,  $J$  = 8.0 Hz, 1H), 7.47 – 7.37 (m, 3H), 7.31 – 7.26 (m, 2H), 7.19 (s, 1H), 2.67 (s, 3H), 2.38 (s, 3H), 2.23 (s, 3H).  $^{13}\text{C}$  NMR (100 MHz,  $\text{CDCl}_3$ ):  $\delta$  (ppm) 156.8, 151.6, 142.0, 139.2, 137.3, 136.1, 132.1, 130.7, 129.8, 129.2, 129.1, 128.6, 128.2, 127.5, 114.1, 113.8, 20.8, 18.2, 12.5. HR-MS (ESI): calcd for  $[\text{M}+\text{H}]^+$   $\text{C}_{21}\text{H}_{20}\text{N}_3$ : 314.1651; found: 314.1545.

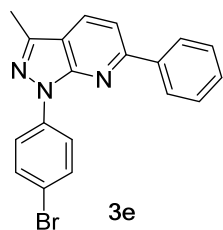

**1-(4-Bromophenyl)-3-methyl-6-phenyl-1H-pyrazolo[3,4-*b*]pyridine (3e)**, 59 mg, 81%, white solid, m.p. 164–165 °C.  $^1\text{H}$  NMR (400 MHz,  $\text{CDCl}_3$ ):  $\delta$  (ppm) 8.39 – 8.35 (m, 2H), 8.16 – 8.11 (m, 2H), 8.06 (d,  $J$  = 8.0 Hz, 1H), 7.66 (d,  $J$  = 8.0 Hz, 1H), 7.65 – 7.61 (m, 2H), 7.56 – 7.50 (m, 2H), 7.50 – 7.45 (m, 1H), 2.64 (s, 3H).  $^{13}\text{C}$  NMR (100 MHz,  $\text{CDCl}_3$ ):  $\delta$  (ppm) 156.8, 150.9, 142.9, 138.9, 138.8, 131.9, 130.0, 129.5, 128.8, 127.4, 121.6, 118.0, 115.9, 114.4, 12.5. HR-MS (ESI): calcd for  $[\text{M}+\text{H}]^+$   $\text{C}_{19}\text{H}_{15}\text{BrN}_3$ : 364.0443; found: 364.0436.

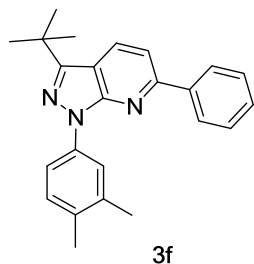

**3-(*tert*-Butyl)-1-(3,4-dimethylphenyl)-6-phenyl-1*H*-pyrazolo[3,4-*b*]pyridine (3f)**, 52 mg, 74%, white solid, m.p. 122–123 °C. <sup>1</sup>H NMR (400 MHz, CDCl<sub>3</sub>): δ (ppm) 8.27 (d, *J* = 8.4 Hz, 1H), 8.20 – 8.17 (m, 2H), 8.17 – 8.14 (m, 2H), 7.63 (d, *J* = 8.5 Hz, 1H), 7.55 – 7.50 (m, 2H), 7.49 – 7.44 (m, 1H), 7.30 (d, *J* = 8.1 Hz, 1H), 2.41 (s, 3H), 2.33 (s, 3H), 1.60 (s, 9H). <sup>13</sup>C NMR (100 MHz, CDCl<sub>3</sub>): δ (ppm) 155.7, 153.0, 151.3, 139.3, 137.7, 137.0, 133.4, 131.4, 129.8, 129.2, 122.1, 118.4, 113.5, 113.4, 34.2, 29.9, 20.1, 19.3. HR-MS (ESI): calcd for [M+H]<sup>+</sup> C<sub>24</sub>H<sub>26</sub>N<sub>3</sub>: 356.2121; found: 356.2124.

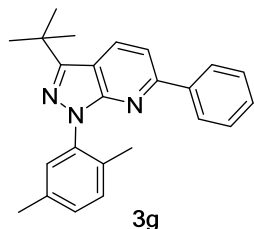

**3-(*tert*-Butyl)-1-(2,5-dimethylphenyl)-6-phenyl-1*H*-pyrazolo[3,4-*b*]pyridine (3g)**, 58 mg, 82 %, white solid, m.p. 145–147 °C. <sup>1</sup>H NMR (400 MHz, CDCl<sub>3</sub>): δ (ppm) 8.29 (d, *J* = 8.5 Hz, 1H), 8.09 – 8.03 (m, 2H), 7.61 (d, *J* = 8.5 Hz, 1H), 7.48 – 7.35 (m, 4H), 7.28 (s, 1H), 7.16 (dd, *J* = 7.8, 1.4 Hz, 1H), 2.40 (s, 3H), 2.24 (s, 3H), 1.59 (s, 9H). <sup>13</sup>C NMR (100 MHz, CDCl<sub>3</sub>): δ (ppm) 156.0, 153.2, 152.1, 139.3, 137.4, 135.9, 132.1, 131.4, 130.9, 129.1, 128.8, 128.6, 128.2, 127.4, 113.4, 112.0, 34.2, 30.1, 20.8, 18.4. HR-MS (ESI): calcd for [M+H]<sup>+</sup> C<sub>24</sub>H<sub>26</sub>N<sub>3</sub>: 356.2121; found: 356.2123.

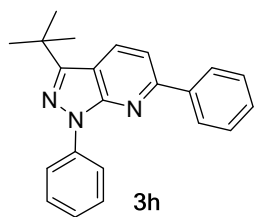

**3-(*tert*-Butyl)-1,6-diphenyl-1*H*-pyrazolo[3,4-*b*]pyridine (3h)**, 50 mg, 76%, white solid, m.p. 104–106 °C. <sup>1</sup>H NMR (400 MHz, CDCl<sub>3</sub>): δ (ppm) 8.49 (dd, *J* = 8.7, 1.1 Hz, 2H), 8.28 (d, *J* = 8.4 Hz, 1H), 8.21 – 8.14 (m, 2H), 7.64 (d, *J* = 8.5 Hz, 1H), 7.54 (ddd, *J* = 12.7, 4.9, 2.3 Hz, 4H), 7.50 – 7.44 (m, 1H), 7.28 (dt, *J* = 7.6, 1.0 Hz, 1H), 1.60 (s, 9H). <sup>13</sup>C NMR (100 MHz, CDCl<sub>3</sub>): δ (ppm) 155.9, 153.5, 151.6, 140.0, 139.3, 131.5, 129.3, 128.7, 127.5, 125.0, 120.6, 113.8, 34.3, 29.9. HR-MS (ESI): calcd for [M+H]<sup>+</sup> C<sub>22</sub>H<sub>22</sub>N<sub>3</sub>: 328.1808; found: 328.1810.

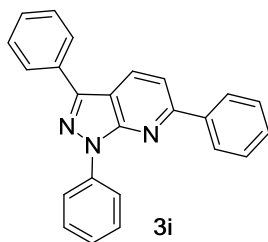

**1,3,6-Triphenyl-1H-pyrazolo[3,4-*b*]pyridine (3i)**, 51 mg, 74%, white solid, m.p. 160–161 °C. <sup>1</sup>H NMR (400 MHz, CDCl<sub>3</sub>): δ (ppm) 8.55 (dd, *J* = 8.7, 1.0 Hz, 2H), 8.43 (d, *J* = 8.5 Hz, 1H), 8.23 – 8.17 (m, 2H), 8.08 (dd, *J* = 8.1, 1.1 Hz, 2H), 7.75 (d, *J* = 8.5 Hz, 1H), 7.59 (d, *J* = 7.5 Hz, 2H), 7.56 (d, *J* = 1.0 Hz, 2H), 7.55 – 7.52 (m, 2H), 7.51 – 7.46 (m, 2H), 7.37 – 7.31 (m, 1H). <sup>13</sup>C NMR (100 MHz, CDCl<sub>3</sub>): δ (ppm) 156.7, 151.6, 144.1, 139.7, 139.0, 132.8, 131.0, 129.5, 128.9, 128.9, 128.8, 128.6, 127.5, 127.3, 125.6, 121.1, 115.2, 114.1. HR-MS (ESI): calcd for [M+H]<sup>+</sup> C<sub>24</sub>H<sub>18</sub>N<sub>3</sub>: 348.1495; found: 348.1495.

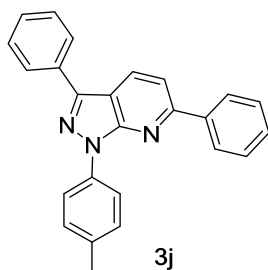

**3,6-Diphenyl-1-(*p*-tolyl)-1H-pyrazolo[3,4-*b*]pyridine (3j)**, 55 mg, 76%, white solid, m.p. 179–181 °C. <sup>1</sup>H NMR (400 MHz, CDCl<sub>3</sub>): δ (ppm) 8.42 (dd, *J* = 8.5, 1.4 Hz, 1H), 8.40 – 8.36 (m, 2H), 8.19 (dd, *J* = 8.1, 1.1 Hz, 2H), 8.08 (dd, *J* = 8.0, 1.0 Hz, 2H), 7.74 (dd, *J* = 8.5, 1.3 Hz, 1H), 7.55 (q, *J* = 8.2, 7.8 Hz, 4H), 7.51 – 7.45 (m, 2H), 7.38 (d, *J* = 8.2 Hz, 2H), 2.45 (s, 3H). <sup>13</sup>C NMR (100 MHz, CDCl<sub>3</sub>): δ (ppm) 156.5, 151.4, 143.7, 139.0, 137.3, 135.4, 132.9, 130.9, 129.5, 128.9, 128.7, 128.5, 127.5, 127.2, 121.1, 115.1, 113.9, 21.0. HR-MS (ESI): calcd for [M+H]<sup>+</sup> C<sub>25</sub>H<sub>20</sub>N<sub>3</sub>: 362.1651; found: 362.1651.

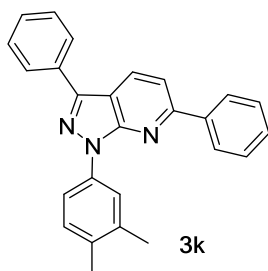

**1-(3,4-Dimethylphenyl)-3,6-diphenyl-1H-pyrazolo[3,4-*b*]pyridine (3k)**, 56 mg, 75%, white solid, m.p. 205–206 °C. <sup>1</sup>H NMR (400 MHz, CDCl<sub>3</sub>): δ (ppm) 8.42 (d, *J* = 8.5 Hz, 1H), 8.25 (dd, *J* = 10.9, 2.7 Hz, 2H), 8.22 – 8.17 (m, 2H), 8.08 (d, *J* = 7.1 Hz, 2H), 7.74 (d, *J* = 8.5 Hz, 1H), 7.59 – 7.54 (m, 2H), 7.53 (d, *J* = 7.8 Hz, 2H), 7.50 – 7.44 (m, 2H), 7.33 (d, *J* = 8.1 Hz, 1H), 2.42 (s, 3H), 2.36 (s, 3H). <sup>13</sup>C NMR (100 MHz, CDCl<sub>3</sub>): δ (ppm) 156.4, 151.4, 143.6, 139.0, 137.5, 137.2, 134.1, 133.0, 130.8, 129.9,

129.4, 128.9, 128.7, 128.5, 127.5, 127.2, 122.4, 118.7, 115.0, 113.8, 20.1, 19.3. HR-MS (ESI): calcd for  $[M+H]^+$   $C_{26}H_{22}N_3$ : 376.1808; found: 376.1808.

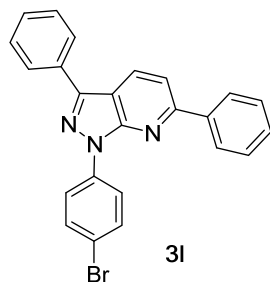

**1-(4-Bromophenyl)-3,6-diphenyl-1H-pyrazolo[3,4-*b*]pyridine (3l)**, 68 mg, 80%, white solid, m.p. 172–173 °C.  $^1H$  NMR (400 MHz,  $CDCl_3$ ):  $\delta$  (ppm) 8.52 – 8.47 (m, 2H), 8.44 (d,  $J$  = 8.5 Hz, 1H), 8.20 – 8.15 (m, 2H), 8.09 – 8.04 (m, 2H), 7.77 (d,  $J$  = 8.5 Hz, 1H), 7.70 – 7.65 (m, 2H), 7.59 – 7.52 (m, 4H), 7.52 – 7.46 (m, 2H).  $^{13}C$  NMR (100 MHz,  $CDCl_3$ ):  $\delta$  (ppm) 156.8, 151.6, 144.5, 138.8, 132.6, 131.9, 131.1, 129.7, 129.1, 128.9, 127.5, 127.3, 122.2, 118.7, 115.5, 114.3. HR-MS (ESI): calcd for  $[M+H]^+$   $C_{24}H_{17}BrN_3$ : 426.0600; found: 426.0602.

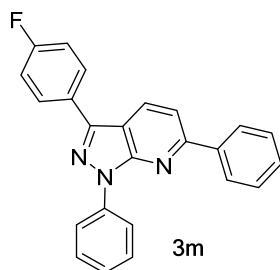

**3-(4-Fluorophenyl)-1,6-diphenyl-1H-pyrazolo[3,4-*b*]pyridine (3m)**, 50 mg, 68%, white solid, m.p. 164–165 °C.  $^1H$  NMR (400 MHz,  $CDCl_3$ ):  $\delta$  (ppm) 8.51 (dd,  $J$  = 8.6, 1.0 Hz, 2H), 8.35 (d,  $J$  = 8.5 Hz, 1H), 8.18 (dd,  $J$  = 8.2, 1.2 Hz, 2H), 8.08 – 8.00 (m, 2H), 7.73 (d,  $J$  = 8.5 Hz, 1H), 7.60 – 7.46 (m, 5H), 7.34 (t,  $J$  = 7.4 Hz, 1H), 7.23 (d,  $J$  = 8.7 Hz, 2H).  $^{13}C$  NMR (100 MHz,  $CDCl_3$ ):  $\delta$  (ppm) 164.30, 161.83, 156.73, 151.51, 143.12, 139.68, 138.87, 130.73, 129.61, 128.9 (d,  $J$  = 2.0 Hz), 128.8 (d,  $J$  = 8.0 Hz), 127.55, 125.72, 121.02, 115.9 (d,  $J$  = 22.0 Hz), 115.29, 113.86. HR-MS (ESI): calcd for  $[M+H]^+$   $C_{24}H_{17}FN_3$ : 366.1401; found: 366.1405.

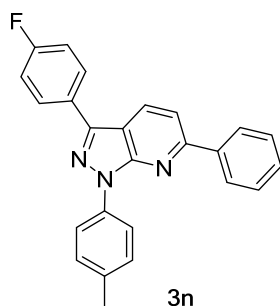

**3-(4-Fluorophenyl)-6-phenyl-1-(*p*-tolyl)-1H-pyrazolo[3,4-*b*]pyridine (3n)**, 53 mg, 70%, white solid, m.p. 188–189 °C.  $^1H$  NMR (400 MHz,  $CDCl_3$ ):  $\delta$  (ppm) 8.41 – 8.33 (m, 3H), 8.21 – 8.17 (m, 2H), 8.08 – 8.02 (m, 2H), 7.75 (d,  $J$  = 8.5 Hz, 1H), 7.57 – 7.51 (m, 2H), 7.51 – 7.46 (m, 1H), 7.40 – 7.35 (m, 2H), 7.26 – 7.20 (m, 2H), 2.45 (s, 3H).  $^{13}C$  NMR (100 MHz,  $CDCl_3$ ):  $\delta$  (ppm) 164.2, 161.7, 156.6, 151.3, 142.8, 138.93,

137.1, 135.5, 130.7, 129.5 (d,  $J = 3.0$  Hz), 128.9 (d,  $J = 8.0$  Hz), 128.8, 127.5, 121.1, 115.9 (d,  $J = 21.0$  Hz), 115.2, 113.6, 21.0. HR-MS (ESI): calcd for  $[M+H]^+$   $C_{25}H_{19}FN_3$ : 380.1557; found: 380.1559.

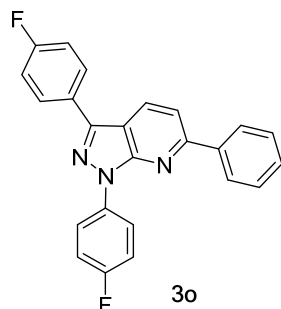

**1,3-bis(4-Fluorophenyl)-6-phenyl-1H-pyrazolo[3,4-b]pyridine (3o)**, 57 mg, 74%, white solid, m.p. 207–208 °C.  $^1H$  NMR (400 MHz,  $CDCl_3$ ):  $\delta$  (ppm) 8.47 (dd,  $J = 8.7$ , 4.9 Hz, 2H), 8.38 (d,  $J = 8.6$  Hz, 1H), 8.17 (d,  $J = 7.2$  Hz, 2H), 8.08 – 7.98 (m, 2H), 7.76 (d,  $J = 8.5$  Hz, 1H), 7.53 (dt,  $J = 13.9$ , 7.1 Hz, 3H), 7.26 (q,  $J = 5.7$ , 4.0 Hz, 4H).  $^{13}C$  NMR (100 MHz,  $CDCl_3$ ):  $\delta$  (ppm) 164.3, 161.8 (d,  $J = 8.0$  Hz), 159.3, 156.9, 151.3, 143.2, 138.8, 135.8 (d,  $J = 3.0$  Hz), 130.9, 129.2, 129.0, 128.9 (d,  $J = 4.0$  Hz), 127.5, 122.6 (d,  $J = 8.0$  Hz), 116.1, 115.9 (d,  $J = 9.0$  Hz), 115.5 (d,  $J = 18.0$  Hz), 113.7, 99.9. HR-MS (ESI): calcd for  $[M+H]^+$   $C_{24}H_{16}F_2N_3$ : 384.1306; found: 384.1310.

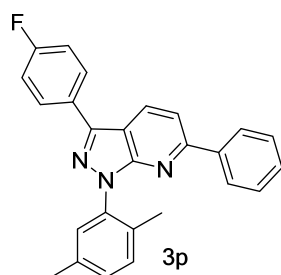

**1-(2,5-Dimethylphenyl)-3-(4-fluorophenyl)-6-phenyl-1H-pyrazolo[3,4-b]pyridine (3p)**, 55 mg, 70%, white solid, m.p. 163–164 °C.  $^1H$  NMR (400 MHz,  $CDCl_3$ ):  $\delta$  (ppm) 8.41 (d,  $J = 8.5$  Hz, 1H), 8.08 (dd,  $J = 8.1$ , 1.4 Hz, 2H), 8.06 – 8.01 (m, 2H), 7.74 (d,  $J = 8.5$  Hz, 1H), 7.48 – 7.40 (m, 3H), 7.38 (s, 1H), 7.31 (d,  $J = 7.8$  Hz, 1H), 7.21 (d,  $J = 8.6$  Hz, 3H), 2.40 (s, 3H), 2.26 (s, 3H).  $^{13}C$  NMR (100 MHz,  $CDCl_3$ ):  $\delta$  (ppm) 164.1, 161.6, 156.9, 152.1, 143.0, 138.8, 137.1, 136.2, 132.1, 130.8 (d,  $J = 20.0$  Hz), 129.4 (d,  $J = 4.0$  Hz), 128.8 (d,  $J = 8.0$  Hz), 128.7, 128.3, 127.5, 115.9 (d,  $J = 22.0$  Hz), 115.0, 112.2, 20.8, 18.3. HR-MS (ESI): calcd for  $[M+H]^+$   $C_{26}H_{21}FN_3$ : 394.1714; found: 394.1714.

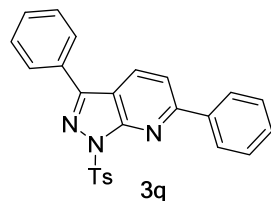

**3,6-Diphenyl-1-tosyl-1H-pyrazolo[3,4-b]pyridine (3q)**, 53 mg, 63%, white solid, m.p. 198–199 °C.  $^1H$  NMR (400 MHz,  $CDCl_3$ ):  $\delta$  (ppm) 8.29 (d,  $J = 8.5$  Hz, 1H), 8.27 – 8.21 (m, 2H), 8.19 (d,  $J = 8.4$  Hz, 2H), 7.97 (dd,  $J = 8.0$ , 1.4 Hz, 2H), 7.81 (d,  $J =$

8.5 Hz, 1H), 7.59 – 7.44 (m, 6H), 7.27 (d,  $J$  = 8.1 Hz, 2H), 2.35 (s, 3H).  $^{13}\text{C}$  NMR (100 MHz,  $\text{CDCl}_3$ ):  $\delta$  (ppm) 157.7, 152.8, 148.4, 145.3, 138.0, 135.1, 131.3, 130.0, 129.7, 129.7, 128.9, 128.3, 127.7, 127.6, 116.7, 114.8, 21.6. HR-MS (ESI): calcd for  $[\text{M}+\text{H}]^+$   $\text{C}_{25}\text{H}_{20}\text{N}_3\text{O}_2\text{S}$ : 426.1270; found: 426.1273.

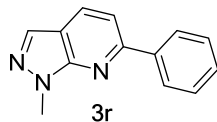

**Methyl-6-phenyl-1H-pyrazolo[3,4-*b*]pyridine (3r)**, 28 mg, 66%, white solid, m.p. 51–53 °C.  $^1\text{H}$  NMR (400 MHz,  $\text{CDCl}_3$ ):  $\delta$  (ppm) 8.16 – 8.11 (m, 2H), 8.08 (d,  $J$  = 8.3 Hz, 1H), 8.00 (s, 1H), 7.59 (d,  $J$  = 8.3 Hz, 1H), 7.51 (t,  $J$  = 7.3 Hz, 2H), 7.45 (t,  $J$  = 7.2 Hz, 1H), 4.22 (s, 3H).  $^{13}\text{C}$  NMR (100 MHz,  $\text{CDCl}_3$ ):  $\delta$  (ppm) 156.2, 150.4, 139.2, 131.4, 130.1, 129.1, 128.6, 127.3, 114.1, 113.9, 33.6. HR-MS (ESI): calcd for  $[\text{M}+\text{H}]^+$   $\text{C}_{13}\text{H}_{12}\text{N}_3$ : 210.1025; found: 210.1028.

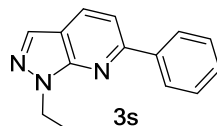

**Ethyl-6-phenyl-1H-pyrazolo[3,4-*b*]pyridine (3s)**, 30 mg, 68%, white solid, m.p. 67–69 °C.  $^1\text{H}$  NMR (400 MHz,  $\text{CDCl}_3$ ):  $\delta$  (ppm) 8.16 – 8.12 (m, 2H), 8.08 (d,  $J$  = 8.4 Hz, 1H), 8.00 (s, 1H), 7.59 (d,  $J$  = 8.4 Hz, 1H), 7.54 – 7.48 (m, 2H), 7.48 – 7.42 (m, 1H), 4.66 (q,  $J$  = 7.3 Hz, 2H), 1.60 (t,  $J$  = 7.3 Hz, 3H).  $^{13}\text{C}$  NMR (100 MHz,  $\text{CDCl}_3$ ):  $\delta$  (ppm) 156.2, 150.1, 139.4, 131.5, 130.2, 129.2, 128.7, 127.4, 114.3, 41.8, 14.9. HR-MS (ESI): calcd for  $[\text{M}+\text{H}]^+$   $\text{C}_{14}\text{H}_{14}\text{N}_3$ : 224.1182; found: 224.1180. The experimental data of **3s** match with those reported in the literature [53].

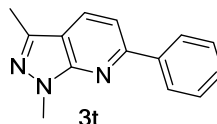

**1,3-Dimethyl-6-phenyl-1H-pyrazolo[3,4-*b*]pyridine (3t)**, 33 mg, 75%, white solid, m.p. 57–59 °C.  $^1\text{H}$  NMR (400 MHz,  $\text{CDCl}_3$ ):  $\delta$  (ppm) 8.16 – 8.11 (m, 2H), 8.01 (d,  $J$  = 8.0 Hz, 1H), 7.55 (d,  $J$  = 8.0 Hz, 1H), 7.53 – 7.48 (m, 2H), 7.47 – 7.42 (m, 1H), 4.14 (s, 3H), 2.58 (s, 3H).  $^{13}\text{C}$  NMR (100 MHz,  $\text{CDCl}_3$ ):  $\delta$  (ppm) 156.4, 151.4, 140.2, 139.5, 129.7, 129.2, 128.7, 127.4, 113.6, 113.4, 33.3, 12.4. HR-MS (ESI): calcd for  $[\text{M}+\text{H}]^+$   $\text{C}_{14}\text{H}_{14}\text{N}_3$ : 224.1182; found: 224.1184.

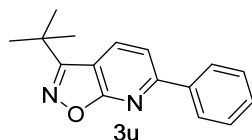

**3-(*tert*-Butyl)-6-phenylisoxazolo[5,4-*b*]pyridine (3u)**, 38 mg, 75%, white solid, m.p. 99–100 °C.  $^1\text{H}$  NMR (400 MHz,  $\text{CDCl}_3$ ):  $\delta$  (ppm) 8.20 (d,  $J$  = 8.3 Hz, 1H), 8.14 – 8.10 (m, 2H), 7.75 (d,  $J$  = 8.3 Hz, 1H), 7.53 – 7.46 (m, 3H), 1.55 (s, 9H).  $^{13}\text{C}$  NMR (100 MHz,  $\text{CDCl}_3$ ):  $\delta$  (ppm) 170.4, 165.7, 158.2, 137.8, 133.0, 130.0, 128.8, 127.6, 116.1, 110.1, 34.0, 28.9. HR-MS (ESI): calcd for  $[\text{M}+\text{H}]^+$   $\text{C}_{16}\text{H}_{17}\text{N}_2\text{O}$ : 253.1335;

found: 253.1338.

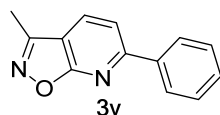

**3-Methyl-6-phenylisoxazolo[5,4-*b*]pyridine (3v)**, 30 mg, 71%, yellow solid, m.p. 172–173 °C.  $^1\text{H}$  NMR (400 MHz,  $\text{CDCl}_3$ ):  $\delta$  (ppm) 8.13 (dt,  $J = 2.1, 1.3$  Hz, 1H), 8.12 (dd,  $J = 2.2, 1.4$  Hz, 1H), 8.05 (d,  $J = 8.2$  Hz, 1H), 7.77 (d,  $J = 8.2$  Hz, 1H), 7.53 – 7.50 (m, 1H), 7.50 – 7.45 (m, 2H), 2.60 (s, 3H).  $^{13}\text{C}$  NMR (100 MHz,  $\text{CDCl}_3$ ):  $\delta$  (ppm) 170.0, 158.8, 155.3, 137.9, 131.6, 130.1, 128.9, 127.6, 116.4, 111.9, 10.8. HR-MS (ESI): calcd for  $[\text{M}+\text{H}]^+$   $\text{C}_{13}\text{H}_{11}\text{N}_2\text{O}$ : 211.0865; found: 211.0867. The experimental data of **3v** match with those reported in the literature [54].

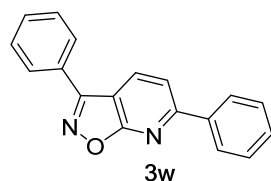

**3,6-Diphenylisoxazolo[5,4-*b*]pyridine (3w)**, 39 mg, 71%, white solid, m.p. 155–156 °C.  $^1\text{H}$  NMR (400 MHz,  $\text{CDCl}_3$ ):  $\delta$  (ppm) 8.35 (dd,  $J = 8.3, 0.5$  Hz, 1H), 8.21 – 8.13 (m, 2H), 8.02 – 7.96 (m, 2H), 7.88 – 7.83 (m, 1H), 7.61 – 7.56 (m, 3H), 7.56 – 7.48 (m, 3H).  $^{13}\text{C}$  NMR (100 MHz,  $\text{CDCl}_3$ ):  $\delta$  (ppm) 170.7, 158.8, 157.2, 137.7, 132.6, 130.6, 130.2, 129.2, 128.9, 128.7, 127.7, 127.6, 117.1, 110.3. HR-MS (ESI): calcd for  $[\text{M}+\text{H}]^+$   $\text{C}_{18}\text{H}_{13}\text{N}_2\text{O}$ : 273.1022; found: 273.1023.

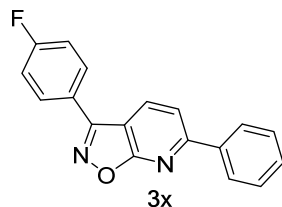

**3-(4-Fluorophenyl)-6-phenylisoxazolo[5,4-*b*]pyridine (3x)**, 41 mg, 70%, white solid, m.p. 204–205 °C.  $^1\text{H}$  NMR (400 MHz,  $\text{CDCl}_3$ ):  $\delta$  (ppm) 8.32 (d,  $J = 8.3$  Hz, 1H), 8.19 – 8.14 (m, 2H), 8.02 – 7.97 (m, 2H), 7.87 (d,  $J = 8.3$  Hz, 1H), 7.57 – 7.48 (m, 3H), 7.31 – 7.26 (m, 2H).  $^{13}\text{C}$  NMR (100 MHz,  $\text{CDCl}_3$ ):  $\delta$  (ppm) 170.7, 165.4, 162.9, 158.9, 156.3, 137.6, 132.4, 130.3, 129.6 (d,  $J = 8.0$  Hz), 128.9, 127.7, 124.9 (d,  $J = 3.0$  Hz), 117.2, 116.5 (d,  $J = 22.0$  Hz), 110.1. HR-MS (ESI): calcd for  $[\text{M}+\text{H}]^+$   $\text{C}_{18}\text{H}_{12}\text{FN}_2\text{O}$ : 291.0928; found: 291.0929.

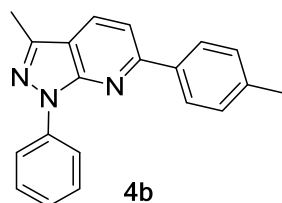

**3-Methyl-1-phenyl-6-(*p*-tolyl)-1*H*-pyrazolo[3,4-*b*]pyridine (4b)**, 47 mg, 78%, white solid, m.p. 100–101 °C.  $^1\text{H}$  NMR (400 MHz,  $\text{CDCl}_3$ ):  $\delta$  (ppm) 8.48 – 8.42 (m, 2H), 8.09 – 8.05 (m, 2H), 8.02 (d,  $J = 8.3$  Hz, 1H), 7.62 (d,  $J = 8.4$  Hz, 1H), 7.59 – 7.50 (m, 2H), 7.33 (d,  $J = 8.4$  Hz, 2H), 7.29 (m, 1H), 2.65 (s, 3H), 2.44 (s, 3H).  $^{13}\text{C}$  NMR (100

MHz, CDCl<sub>3</sub>):  $\delta$  (ppm) 156.7, 151.0, 142.4, 139.8, 139.4, 136.4, 129.7, 129.4, 128.9, 127.4, 125.0, 120.4, 115.5, 114.0, 21.2, 12.4. HR-MS (ESI): calcd for [M+H]<sup>+</sup> C<sub>20</sub>H<sub>18</sub>N<sub>3</sub>: 300.1495; found: 300.1497. The experimental data of **4b** match with those reported in the literature [52].

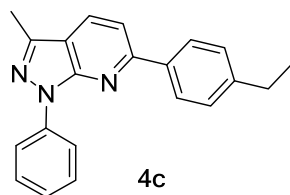

**6-(4-Ethylphenyl)-3-methyl-1-phenyl-1H-pyrazolo[3,4-*b*]pyridine (4c)**, 44 mg, 70%, white solid, m.p. 101–102 °C. <sup>1</sup>H NMR (400 MHz, CDCl<sub>3</sub>):  $\delta$  (ppm) 8.47 – 8.43 (m, 2H), 8.12 – 8.08 (m, 2H), 8.05 (d, *J* = 8.4 Hz, 1H), 7.64 (d, *J* = 8.4 Hz, 1H), 7.57 – 7.50 (m, 2H), 7.36 (d, *J* = 8.5 Hz, 2H), 7.29 (dt, *J* = 7.1, 1.0 Hz, 1H), 2.74 (q, *J* = 7.6 Hz, 2H), 2.66 (s, 3H), 1.31 (t, *J* = 7.6 Hz, 3H). <sup>13</sup>C NMR (100 MHz, CDCl<sub>3</sub>):  $\delta$  (ppm) 156.8, 151.1, 145.8, 142.5, 139.8, 136.7, 129.7, 128.9, 128.3, 127.5, 125.0, 120.4, 115.6, 114.1, 28.7, 15.4, 12.4. HR-MS (ESI): calcd for [M+H]<sup>+</sup> C<sub>21</sub>H<sub>20</sub>N<sub>3</sub>: 314.1651; found: 314.1651.

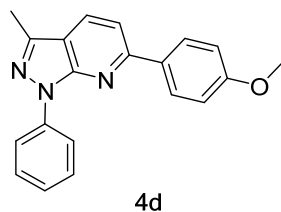

**6-(4-Methoxyphenyl)-3-methyl-1-phenyl-1H-pyrazolo[3,4-*b*]pyridine (4d)**, 40 mg, 64%, white solid, m.p. 117–118 °C. <sup>1</sup>H NMR (400 MHz, CDCl<sub>3</sub>):  $\delta$  (ppm) 8.46 – 8.40 (m, 2H), 8.16 – 8.10 (m, 2H), 8.01 (d, *J* = 8.4 Hz, 1H), 7.59 (d, *J* = 8.4 Hz, 1H), 7.57 – 7.49 (m, 2H), 7.31 – 7.26 (m, 1H), 7.07 – 7.00 (m, 2H), 3.89 (s, 3H), 2.64 (s, 3H). <sup>13</sup>C NMR (100 MHz, CDCl<sub>3</sub>):  $\delta$  (ppm) 160.8, 156.3, 151.1, 142.5, 139.8, 131.8, 129.7, 128.9, 128.8, 125.0, 120.5, 115.3, 114.1, 113.6, 55.3, 12.4. HR-MS (ESI): calcd for [M+H]<sup>+</sup> C<sub>20</sub>H<sub>18</sub>N<sub>3</sub>O: 316.1444; found: 316.1445. The experimental data of **4d** match with those reported in the literature[52].

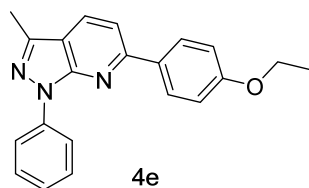

**6-(4-Ethoxyphenyl)-3-methyl-1-phenyl-1H-pyrazolo[3,4-*b*]pyridine (4e)**, 43 mg, 65%, white solid, m.p. 132–133 °C. <sup>1</sup>H NMR (400 MHz, CDCl<sub>3</sub>):  $\delta$  (ppm) 8.45 – 8.39 (m, 2H), 8.14 – 8.09 (m, 2H), 8.02 (d, *J* = 8.4 Hz, 1H), 7.60 (d, *J* = 8.4 Hz, 1H), 7.57 – 7.50 (m, 2H), 7.31 – 7.26 (m, 1H), 7.05 – 6.99 (m, 2H), 4.12 (q, *J* = 7.0 Hz, 2H), 2.64 (s, 3H), 1.46 (t, *J* = 7.0 Hz, 3H). <sup>13</sup>C NMR (100 MHz, CDCl<sub>3</sub>):  $\delta$  (ppm) 160.2, 156.4, 151.1, 142.5, 139.8, 131.6, 129.7, 128.9, 128.8, 125.0, 120.5, 115.2, 114.7, 113.6, 63.5, 14.8, 12.4. HR-MS (ESI): calcd for [M+H]<sup>+</sup> C<sub>21</sub>H<sub>20</sub>N<sub>3</sub>O: 330.1600; found: 336.1602.

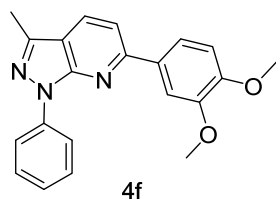

**6-(3,4-Dimethoxyphenyl)-3-methyl-1-phenyl-1H-pyrazolo[3,4-*b*]pyridine (4f)**, 46 mg, 67%, white solid, m.p. 119–120 °C. <sup>1</sup>H NMR (400 MHz, CDCl<sub>3</sub>): δ (ppm) 8.43 (dd, *J* = 8.7, 1.1 Hz, 2H), 8.01 (d, *J* = 8.4 Hz, 1H), 7.84 (d, *J* = 2.0 Hz, 1H), 7.69 (dd, *J* = 8.4, 2.1 Hz, 1H), 7.60 (d, *J* = 8.4 Hz, 1H), 7.55 – 7.48 (m, 2H), 7.31 – 7.25 (m, 1H), 6.98 (d, *J* = 8.4 Hz, 1H), 4.02 (s, 3H), 3.96 (s, 3H), 2.64 (s, 3H). <sup>13</sup>C NMR (100 MHz, CDCl<sub>3</sub>): δ (ppm) 156.1, 150.9, 150.4, 149.1, 142.5, 139.8, 132.0, 129.7, 128.8, 125.0, 120.4, 120.2, 115.3, 113.6, 111.0, 110.4, 55.9, 55.8, 12.4. HR-MS (ESI): calcd for [M+H]<sup>+</sup> C<sub>21</sub>H<sub>20</sub>N<sub>3</sub>O<sub>2</sub>: 346.1550; found: 346.1552.

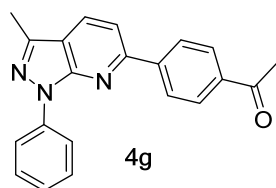

**4-(3-Methyl-1-phenyl-1H-pyrazolo[3,4-*b*]pyridin-6-yl)phenyl)ethan-1-one (4g)**, 53 mg, 81%, white solid, m.p. 149–151 °C. <sup>1</sup>H NMR (400 MHz, CDCl<sub>3</sub>): δ (ppm) 8.42 – 8.38 (m, 2H), 8.25 – 8.21 (m, 2H), 8.08 (dt, *J* = 8.5, 1.6 Hz, 3H), 7.67 (d, *J* = 8.3 Hz, 1H), 7.57 – 7.51 (m, 2H), 7.29 (m, 1H), 2.66 (s, 6H). <sup>13</sup>C NMR (100 MHz, CDCl<sub>3</sub>): δ (ppm) 197.6, 155.0, 150.8, 143.3, 142.5, 139.6, 137.3, 130.1, 128.9, 128.7, 127.5, 125.3, 120.4, 116.2, 114.4, 26.7, 12.4. HR-MS (ESI): calcd for [M+H]<sup>+</sup> C<sub>21</sub>H<sub>18</sub>N<sub>3</sub>O: 328.1444; found: 328.1447.

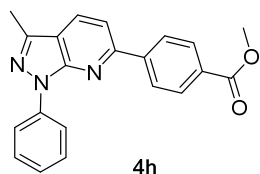

**Methyl 4-(3-methyl-1-phenyl-1H-pyrazolo[3,4-*b*]pyridin-6-yl)benzoate (4h)**, 46 mg, 67%, white solid, m.p. 139–140 °C. <sup>1</sup>H NMR (400 MHz, CDCl<sub>3</sub>): δ (ppm) 8.44 – 8.35 (m, 2H), 8.22 – 8.18 (m, 2H), 8.17 – 8.13 (m, 2H), 8.05 (d, *J* = 8.3 Hz, 1H), 7.65 (d, *J* = 8.3 Hz, 1H), 7.58 – 7.50 (m, 2H), 7.33 – 7.26 (m, 1H), 3.96 (s, 3H), 2.65 (s, 3H). <sup>13</sup>C NMR (100 MHz, CDCl<sub>3</sub>): δ (ppm) 166.7, 155.1, 150.8, 143.2, 142.5, 139.6, 130.6, 130.0, 129.9, 128.9, 127.3, 125.3, 120.4, 116.1, 114.4, 52.1, 12.4. HR-MS (ESI): calcd for [M+H]<sup>+</sup> C<sub>21</sub>H<sub>18</sub>N<sub>3</sub>O<sub>2</sub>: 344.1393; found: 344.1393.

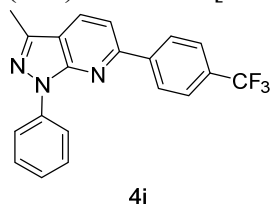

**Methyl 1-phenyl-6-(4-(trifluoromethyl)phenyl)-1H-pyrazolo[3,4-*b*]pyridine (4i)**, 47 mg, 66%, white solid, m.p. 147–148 °C. <sup>1</sup>H NMR (400 MHz, CDCl<sub>3</sub>): δ (ppm) 8.41

– 8.37 (m, 2H), 8.27 – 8.22 (m, 2H), 8.09 (d,  $J = 8.3$  Hz, 1H), 7.76 (d,  $J = 8.2$  Hz, 2H), 7.65 (d,  $J = 8.3$  Hz, 1H), 7.57 – 7.51 (m, 2H), 7.30 (m, 1H), 2.67 (s, 3H).  $^{13}\text{C}$  NMR (100 MHz,  $\text{CDCl}_3$ ):  $\delta$  (ppm) 154.9, 150.8, 142.5, 139.6, 130.2, 128.9, 127.7, 125.6 (q,  $J = 4.0$  MHz), 125.3, 120.5, 116.3, 114.3, 12.4. HR-MS (ESI): calcd for  $[\text{M}+\text{H}]^+$   $\text{C}_{20}\text{H}_{15}\text{F}_3\text{N}_3$ : 354.1212; found: 354.1212. The experimental data of **4i** match with those reported in the literature [55].

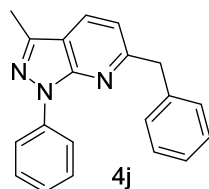

**6-Benzyl-3-methyl-1-phenyl-1H-pyrazolo[3,4-*b*]pyridine (4j)**, 40 mg, 67%, white solid, m.p. 71–72 °C.  $^1\text{H}$  NMR (400 MHz,  $\text{CDCl}_3$ ):  $\delta$  (ppm) 8.43 – 8.29 (m, 2H), 7.90 (d,  $J = 8.2$  Hz, 1H), 7.54 – 7.45 (m, 2H), 7.38 – 7.30 (m, 4H), 7.29 – 7.23 (m, 2H), 7.01 (d,  $J = 8.2$  Hz, 1H), 4.30 (s, 2H), 2.61 (s, 3H).  $^{13}\text{C}$  NMR (100 MHz,  $\text{CDCl}_3$ ):  $\delta$  (ppm) 160.9, 150.6, 142.4, 139.7, 139.3, 129.5, 129.1, 128.8, 128.4, 126.3, 125.1, 120.4, 116.8, 115.1, 45.0, 12.3. HR-MS (ESI): calcd for  $[\text{M}+\text{H}]^+$   $\text{C}_{19}\text{H}_{15}\text{BrN}_3$ : 300.1495; found: 300.1495.

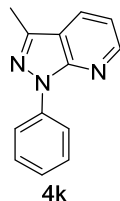

**3-Methyl-1-phenyl-1H-pyrazolo[3,4-*b*]pyridine (4k)**, 31 mg, 73%, yellow solid, m.p. 53–54 °C.  $^1\text{H}$  NMR (400 MHz,  $\text{CDCl}_3$ ):  $\delta$  (ppm) 8.60 (dd,  $J = 4.6, 1.6$  Hz, 1H), 8.29 – 8.21 (m, 2H), 8.03 (dd,  $J = 8.0, 1.6$  Hz, 1H), 7.55 – 7.42 (m, 2H), 7.31 – 7.25 (m, 1H), 7.16 (dd,  $J = 8.0, 4.6$  Hz, 1H), 2.65 (s, 3H).  $^{13}\text{C}$  NMR (100 MHz,  $\text{CDCl}_3$ ):  $\delta$  (ppm) 150.5, 148.8, 142.4, 139.4, 129.4, 128.9, 125.4, 120.8, 116.9, 116.7, 12.3. HR-MS (ESI): calcd for  $[\text{M}+\text{H}]^+$   $\text{C}_{13}\text{H}_{12}\text{N}_3$ : 210.1025; found: 210.1025.

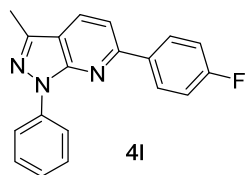

**(4-Fluorophenyl)-3-methyl-1-phenyl-1H-pyrazolo[3,4-*b*]pyridine (4l)**, 44 mg, 73%, white solid, m.p. 128–129 °C.  $^1\text{H}$  NMR (400 MHz,  $\text{CDCl}_3$ ):  $\delta$  (ppm) 8.44 – 8.35 (m, 2H), 8.13 (m, 2H), 8.04 (d,  $J = 8.3$  Hz, 1H), 7.58 (d,  $J = 8.4$  Hz, 1H), 7.57 – 7.50 (m, 2H), 7.32 – 7.26 (m, 1H), 7.23 – 7.15 (m, 2H), 2.65 (s, 3H).  $^{13}\text{C}$  NMR (100 MHz,  $\text{CDCl}_3$ ):  $\delta$  (ppm) 165.0, 162.5, 155.5, 150.9, 142.5, 139.7, 135.3 (d,  $J = 3.0$  MHz), 130.0, 129.3 (d,  $J = 9.0$  MHz), 128.9, 125.2, 120.5, 115.7 (d,  $J = 21.0$  MHz), 113.8, 12.4. HR-MS (ESI): calcd for  $[\text{M}+\text{H}]^+$   $\text{C}_{19}\text{H}_{15}\text{FN}_3$ : 304.1244; found: 304.1244.

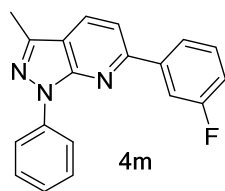

**(3-Fluorophenyl)-3-methyl-1-phenyl-1H-pyrazolo[3,4-*b*]pyridine (4m)**, 41 mg, 67%, white solid, m.p. 117–118 °C.  $^1\text{H}$  NMR (400 MHz,  $\text{CDCl}_3$ ):  $\delta$  (ppm) 8.43 – 8.36 (m, 2H), 8.05 (d,  $J$  = 8.3 Hz, 1H), 7.93 – 7.85 (m, 2H), 7.60 (d,  $J$  = 8.3 Hz, 1H), 7.58 – 7.51 (m, 2H), 7.46 (td,  $J$  = 8.0, 6.1 Hz, 1H), 7.30 (tt,  $J$  = 7.7, 1.1 Hz, 1H), 7.15 (m, 1H), 2.65 (s, 3H).  $^{13}\text{C}$  NMR (100 MHz,  $\text{CDCl}_3$ ):  $\delta$  (ppm) 164.4, 162.0, 155.1 (d,  $J$  = 3.0 MHz), 150.8, 142.5, 141.5 (d,  $J$  = 8.0 MHz), 139.6, 130.2 (d,  $J$  = 8.0 MHz), 130.0, 128.9, 125.3, 123.0 (d,  $J$  = 3.0 MHz), 120.5, 116.2, 116.1 (d,  $J$  = 4.0 MHz), 114.3 (d,  $J$  = 23.0 MHz), 114.1, 12.4. HR-MS (ESI): calcd for  $[\text{M}+\text{H}]^+$   $\text{C}_{19}\text{H}_{15}\text{FN}_3$ : 304.1244; found: 304.1244.

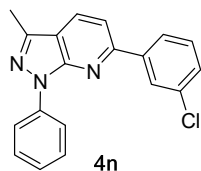

**(3-Chlorophenyl)-3-methyl-1-phenyl-1H-pyrazolo[3,4-*b*]pyridine (4n)**, 46 mg, 72%, white solid, m.p. 124–125 °C.  $^1\text{H}$  NMR (400 MHz,  $\text{CDCl}_3$ ):  $\delta$  (ppm) 8.38 (d,  $J$  = 7.7 Hz, 2H), 8.18 – 7.97 (m, 3H), 7.59 (d,  $J$  = 8.3 Hz, 1H), 7.54 (t,  $J$  = 7.9 Hz, 2H), 7.47 – 7.39 (m, 2H), 7.30 (t,  $J$  = 7.3 Hz, 1H), 2.65 (s, 3H).  $^{13}\text{C}$  NMR (100 MHz,  $\text{CDCl}_3$ ):  $\delta$  (ppm) 155.0, 150.8, 142.5, 141.0, 139.6, 134.8, 130.0, 129.9, 129.2, 128.9, 127.6, 125.6, 125.3, 120.5, 116.1, 114.1, 12.4. HR-MS (ESI): calcd for  $[\text{M}+\text{H}]^+$   $\text{C}_{19}\text{H}_{15}\text{ClN}_3$ : 320.0949; found: 320.0951.

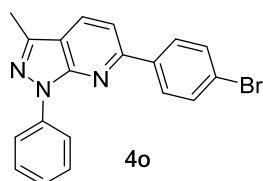

**(4-Bromophenyl)-3-methyl-1-phenyl-1H-pyrazolo[3,4-*b*]pyridine (4o)**, 52 mg, 71%, yellow solid, m.p. 127–128 °C.  $^1\text{H}$  NMR (400 MHz,  $\text{CDCl}_3$ ):  $\delta$  (ppm) 8.41 – 8.36 (m, 2H), 8.04 – 7.98 (m, 3H), 7.65 – 7.60 (m, 2H), 7.57 (d,  $J$  = 8.4 Hz, 1H), 7.55 – 7.50 (m, 2H), 7.32 – 7.26 (m, 1H), 2.64 (s, 3H).  $^{13}\text{C}$  NMR (100 MHz,  $\text{CDCl}_3$ ):  $\delta$  (ppm) 155.3, 150.8, 142.5, 139.6, 138.0, 131.8, 130.0, 128.9, 128.9, 125.2, 123.9, 120.4, 115.9, 113.8, 12.4. HR-MS (ESI): calcd for  $[\text{M}+\text{H}]^+$   $\text{C}_{19}\text{H}_{15}\text{BrN}_3$ : 364.0443; found: 364.0436.

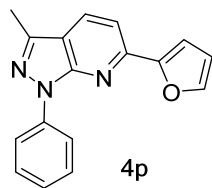

**6-(Furan-2-yl)-3-methyl-1-phenyl-1*H*-pyrazolo[3,4-*b*]pyridine (4p)**, 39 mg, 70%, yellow solid, m.p. 108–109 °C. <sup>1</sup>H NMR (400 MHz, CDCl<sub>3</sub>): δ (ppm) 8.43 – 8.34 (m, 2H), 8.02 (dd, *J* = 8.3, 0.7 Hz, 1H), 7.62 (dd, *J* = 8.3, 0.6 Hz, 1H), 7.58 (dd, *J* = 1.7, 0.8 Hz, 1H), 7.55 – 7.49 (m, 2H), 7.30 – 7.26 (m, 1H), 7.23 (dd, *J* = 3.4, 0.8 Hz, 1H), 6.58 (dd, *J* = 3.4, 1.8 Hz, 1H), 2.63 (s, 3H). <sup>13</sup>C NMR (100 MHz, CDCl<sub>3</sub>): δ (ppm) 153.9, 150.6, 148.3, 143.7, 142.6, 139.7, 129.8, 128.9, 125.1, 120.4, 115.7, 112.5, 112.2, 109.9, 12.4. HR-MS (ESI): calcd for [M+H]<sup>+</sup> C<sub>17</sub>H<sub>14</sub>N<sub>3</sub>O: 276.1131; found: 276.1131.

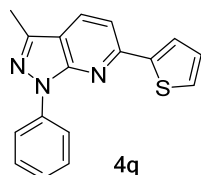

**3-Methyl-1-phenyl-6-(thiophen-2-yl)-1*H*-pyrazolo[3,4-*b*]pyridine (4q)**, 42 mg, 72%, yellow solid, m.p. 91–92 °C. <sup>1</sup>H NMR (400 MHz, CDCl<sub>3</sub>): δ (ppm) 8.44 – 8.40 (m, 2H), 7.96 (d, *J* = 8.3 Hz, 1H), 7.70 (dd, *J* = 3.7, 1.1 Hz, 1H), 7.56 – 7.50 (m, 3H), 7.44 (dd, *J* = 5.1, 1.1 Hz, 1H), 7.30 – 7.25 (m, 1H), 7.13 (dd, *J* = 5.0, 3.7 Hz, 1H), 2.62 (s, 3H). <sup>13</sup>C NMR (100 MHz, CDCl<sub>3</sub>): δ (ppm) 151.6, 150.4, 145.1, 142.6, 139.7, 129.8, 128.3, 128.0, 125.7, 125.0, 120.2, 115.6, 112.8, 12.4. HR-MS (ESI): calcd for [M+H]<sup>+</sup> C<sub>17</sub>H<sub>14</sub>N<sub>3</sub>S: 292.0902; found: 292.0904.

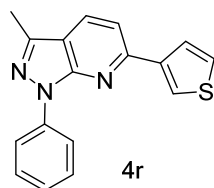

**3-Methyl-1-phenyl-6-(thiophen-3-yl)-1*H*-pyrazolo[3,4-*b*]pyridine (4r)**, 39 mg, 67%, yellow solid, m.p. 121–122 °C. <sup>1</sup>H NMR (400 MHz, CDCl<sub>3</sub>): δ (ppm) 8.43 – 8.38 (m, 2H), 8.02 (dd, *J* = 3.0, 1.3 Hz, 1H), 7.99 (d, *J* = 8.3 Hz, 1H), 7.82 (dd, *J* = 5.1, 1.3 Hz, 1H), 7.56 – 7.50 (m, 3H), 7.42 (dd, *J* = 5.0, 3.0 Hz, 1H), 7.31 – 7.26 (m, 1H), 2.63 (s, 3H). <sup>13</sup>C NMR (100 MHz, CDCl<sub>3</sub>): δ (ppm) 152.5, 150.8, 142.5, 142.2, 139.7, 129.8, 128.8, 126.7, 126.2, 125.1, 124.6, 120.4, 115.4, 114.2, 12.4. HR-MS (ESI): calcd for [M+H]<sup>+</sup> C<sub>17</sub>H<sub>14</sub>N<sub>3</sub>S: 292.0902; found: 292.0902.

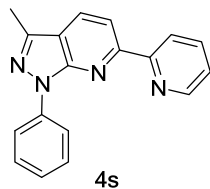

**3-Methyl-1-phenyl-6-(pyridin-2-yl)-1*H*-pyrazolo[3,4-*b*]pyridine (4s)**, 37 mg, 65%, white solid, m.p. 103–104 °C. <sup>1</sup>H NMR (400 MHz, CDCl<sub>3</sub>): δ (ppm) 8.75 – 8.70 (m, 1H), 8.58 (d, *J* = 8.0 Hz, 1H), 8.47 – 8.35 (m, 3H), 8.14 (d, *J* = 8.4 Hz, 1H), 7.88 (td, *J* = 7.9, 1.8 Hz, 1H), 7.55 (td, *J* = 7.5, 1.9 Hz, 2H), 7.36 (ddd, *J* = 7.5, 4.8, 1.1 Hz, 1H), 7.34 – 7.27 (m, 1H), 2.67 (s, 3H). <sup>13</sup>C NMR (100 MHz, CDCl<sub>3</sub>): δ (ppm) 155.8, 154.9, 150.6, 148.8, 142.6, 139.7, 137.2, 130.0, 128.9, 125.2, 124.0, 121.8, 120.5,

117.1, 114.7, 12.4. HR-MS (ESI): calcd for  $[M+H]^+$   $C_{18}H_{15}N_4$ : 287.1291; found: 287.1293.

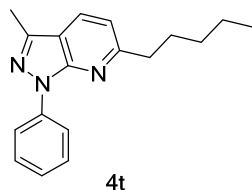

**3-Methyl-6-pentyl-1-phenyl-1H-pyrazolo[3,4-*b*]pyridine (4t)**, 31 mg, 55%, yellow liquid.  $^1H$  NMR (400 MHz,  $CDCl_3$ ):  $\delta$  (ppm) 8.40 – 8.36 (m, 2H), 7.92 – 7.87 (m, 1H), 7.53 – 7.47 (m, 2H), 7.28 – 7.23 (m, 1H), 7.02 (d,  $J$  = 8.1 Hz, 1H), 2.99 – 2.90 (m, 2H), 2.62 (s, 3H), 1.85 (p,  $J$  = 7.4 Hz, 2H), 1.40 (dq,  $J$  = 7.1, 3.7 Hz, 4H), 0.97 – 0.91 (m, 3H).  $^{13}C$  NMR (100 MHz,  $CDCl_3$ ):  $\delta$  (ppm) 162.8, 150.8, 142.3, 139.8, 129.1, 128.8, 124.9, 120.4, 116.7, 114.9, 38.5, 31.5, 29.3, 22.5, 14.0, 12.4. HR-MS (ESI): calcd for  $[M+H]^+$   $C_{18}H_{22}N_3$ : 280.1808; found: 280.1810.

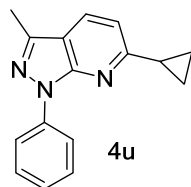

**6-Cyclopropyl-3-methyl-1-phenyl-1H-pyrazolo[3,4-*b*]pyridine (4u)**, 25 mg, 50%, white liquid.  $^1H$  NMR (400 MHz,  $CDCl_3$ ):  $\delta$  (ppm) 8.37 – 8.28 (m, 2H), 7.84 (d,  $J$  = 8.2 Hz, 1H), 7.51 – 7.44 (m, 2H), 7.24 (dt,  $J$  = 7.1, 1.0 Hz, 1H), 7.05 (d,  $J$  = 8.2 Hz, 1H), 2.60 (s, 3H), 2.19 (tt,  $J$  = 8.1, 4.7 Hz, 1H), 1.20 (dt,  $J$  = 4.7, 3.1 Hz, 2H), 1.10 – 1.06 (m, 2H).  $^{13}C$  NMR (100 MHz,  $CDCl_3$ ):  $\delta$  (ppm) 163.6, 151.0, 142.4, 139.9, 128.8, 124.8, 120.1, 115.8, 114.9, 17.7, 12.4, 11.1. HR-MS (ESI): calcd for  $[M+H]^+$   $C_{16}H_{16}N_3$ : 250.1339; found: 250.1338.

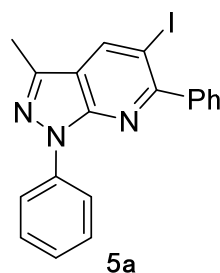

**5-Iodo-3-methyl-1,6-diphenyl-1H-pyrazolo[3,4-*b*]pyridine (5a)**, 55 mg, 68%, white solid, m.p. 117–118 °C.  $^1H$  NMR (400 MHz,  $CDCl_3$ ):  $\delta$  (ppm) 8.61 (s, 1H), 8.34 – 8.25 (m, 2H), 7.72 – 7.65 (m, 2H), 7.49 (dp,  $J$  = 7.7, 1.9 Hz, 3H), 7.47 – 7.43 (m, 2H), 7.26 – 7.20 (m, 1H), 2.65 (s, 3H).  $^{13}C$  NMR (125 MHz,  $CDCl_3$ ):  $\delta$  (ppm) 159.6, 149.9, 142.2, 141.4, 140.5, 139.4, 129.7, 129.0, 128.8, 127.8, 125.5, 120.4, 118.2, 84.1, 12.5. HR-MS (ESI): calcd for  $[M+H]^+$   $C_{19}H_{15}IN_3$ : 412.0305; found: 412.0305.

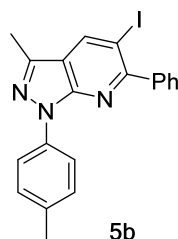

**5-Iodo-3-methyl-6-phenyl-1-(*p*-tolyl)-1*H*-pyrazolo[3,4-*b*]pyridine (5b)**, 51 mg, 60%, white solid, m.p. 137–138 °C. <sup>1</sup>H NMR (400 MHz, CDCl<sub>3</sub>): δ (ppm) 8.60 (s, 1H), 8.18 – 8.07 (m, 2H), 7.72 – 7.63 (m, 2H), 7.51 – 7.45 (m, 3H), 7.26 (d, *J* = 0.9 Hz, 2H), 2.64 (s, 3H), 2.37 (s, 3H). <sup>13</sup>C NMR (125 MHz, CDCl<sub>3</sub>): δ (ppm) 159.5, 149.7, 142.3, 141.0, 140.5, 136.9, 135.2, 129.7, 129.5, 128.7, 127.7, 120.5, 118.0, 83.9, 20.9, 12.4. HR-MS (ESI): calcd for [M+H]<sup>+</sup> C<sub>20</sub>H<sub>17</sub>IN<sub>3</sub>: 426.0462; found: 425.0462.

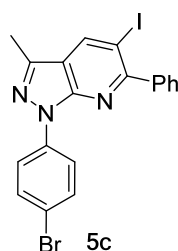

**1-(4-Bromophenyl)-5-iodo-3-methyl-6-phenyl-1*H*-pyrazolo[3,4-*b*]pyridine (5c)**, 64 mg, 66%, white solid, m.p. 204–205 °C. <sup>1</sup>H NMR (400 MHz, CDCl<sub>3</sub>): δ (ppm) 8.61 (s, 1H), 8.31 – 8.16 (m, 2H), 7.70 – 7.63 (m, 2H), 7.58 – 7.54 (m, 2H), 7.52 – 7.47 (m, 3H), 2.64 (s, 3H). <sup>13</sup>C NMR (125 MHz, CDCl<sub>3</sub>): δ (ppm) 159.8, 149.9, 142.1, 141.8, 140.7, 138.5, 132.0, 129.7, 128.9, 127.8, 121.6, 118.4, 118.4, 84.4, 12.5. HR-MS (ESI): calcd for [M+H]<sup>+</sup> C<sub>19</sub>H<sub>14</sub>BrIN<sub>3</sub>: 489.9410; found: 489.9411.

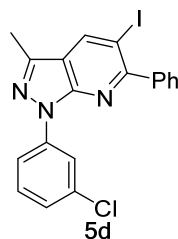

**1-(3-Chlorophenyl)-5-iodo-3-methyl-6-phenyl-1*H*-pyrazolo[3,4-*b*]pyridine (5d)**, 58 mg, 65%, white solid, m.p. 187–188 °C. <sup>1</sup>H NMR (400 MHz, CDCl<sub>3</sub>): δ (ppm) 8.61 (s, 1H), 8.40 – 8.29 (m, 2H), 7.73 – 7.63 (m, 2H), 7.50 (qd, *J* = 4.9, 1.8 Hz, 3H), 7.40 – 7.33 (m, 1H), 7.23 – 7.17 (m, 1H), 2.64 (s, 3H). <sup>13</sup>C NMR (125 MHz, CDCl<sub>3</sub>): δ (ppm) 159.8, 150.0, 142.0, 140.7, 140.4, 134.7, 130.0, 129.7, 128.9, 127.8, 125.3, 120.1, 118.4, 118.0, 84.5, 12.5. HR-MS (ESI): calcd for [M+H]<sup>+</sup> C<sub>19</sub>H<sub>14</sub>ClIN<sub>3</sub>: 445.9915; found: 445.9915.

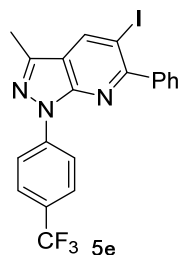

**5-Iodo-3-methyl-6-phenyl-1-(4-(trifluoromethyl)phenyl)-1H-pyrazolo[3,4-*b*]pyridine (5e)**, 63 mg, 66%, white solid, m.p. 169–170 °C.  $^1\text{H}$  NMR (400 MHz,  $\text{CDCl}_3$ ):  $\delta$  (ppm) 8.63 (s, 1H), 8.57 – 8.48 (m, 2H), 7.72 – 7.69 (m, 2H), 7.68 (dd,  $J = 1.7, 0.7$  Hz, 1H), 7.67 (q,  $J = 1.3$  Hz, 1H), 7.54 – 7.48 (m, 3H), 2.66 (s, 3H).  $^{13}\text{C}$  NMR (125 MHz,  $\text{CDCl}_3$ ):  $\delta$  (ppm) 160.0, 150.3, 142.5, 142.0, 140.7, 129.6, 128.9, 127.9, 126.2, 126.2 (q,  $J = 3.0$  MHz), 118.6, 84.8, 12.5. HR-MS (ESI): calcd for  $[\text{M}+\text{H}]^+$   $\text{C}_{20}\text{H}_{14}\text{F}_3\text{IN}_3$ : 480.0179; found: 480.0179.

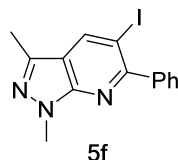

**5-Iodo-1,3-dimethyl-6-phenyl-1H-pyrazolo[3,4-*b*]pyridine (5f)**, 42 mg, 60%, white solid, m.p. 128–129 °C.  $^1\text{H}$  NMR (400 MHz,  $\text{CDCl}_3$ ):  $\delta$  (ppm) 8.54 (s, 1H), 7.65 – 7.56 (m, 2H), 7.52 – 7.42 (m, 3H), 4.05 (s, 3H), 2.56 (s, 3H).  $^{13}\text{C}$  NMR (125 MHz,  $\text{CDCl}_3$ ):  $\delta$  (ppm) 159.4, 150.2, 142.4, 140.2, 139.2, 129.4, 128.7, 127.9, 116.3, 83.1, 12.3. HR-MS (ESI): calcd for  $[\text{M}+\text{H}]^+$   $\text{C}_{14}\text{H}_{13}\text{IN}_3$ : 350.0149; found: 350.0149.

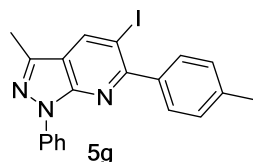

**5-Iodo-3-methyl-1-phenyl-6-(*p*-tolyl)-1H-pyrazolo[3,4-*b*]pyridine (5g)**, 49 mg, 58%, white solid, m.p. 139–140 °C.  $^1\text{H}$  NMR (400 MHz,  $\text{CDCl}_3$ ):  $\delta$  (ppm) 8.60 (s, 1H), 8.34 – 8.22 (m, 2H), 7.65 – 7.55 (m, 2H), 7.50 – 7.42 (m, 2H), 7.30 (dd,  $J = 8.4, 0.6$  Hz, 2H), 7.25 – 7.17 (m, 1H), 2.64 (s, 3H), 2.46 (s, 3H).  $^{13}\text{C}$  NMR (125 MHz,  $\text{CDCl}_3$ ):  $\delta$  (ppm) 159.6, 149.9, 141.3, 140.5, 139.4, 138.7, 129.7, 128.9, 128.5, 125.3, 120.3, 118.1, 84.2, 21.4, 12.4. HR-MS (ESI): calcd for  $[\text{M}+\text{H}]^+$   $\text{C}_{20}\text{H}_{17}\text{IN}_3$ : 426.0462; found: 426.0464.

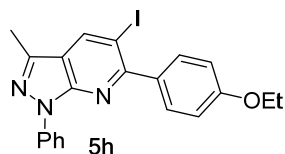

**6-(4-Ethoxyphenyl)-5-iodo-3-methyl-1-phenyl-1H-pyrazolo[3,4-*b*]pyridine (5h)**, 60 mg, 66%, white solid, m.p. 188–189 °C.  $^1\text{H}$  NMR (400 MHz,  $\text{CDCl}_3$ ):  $\delta$  (ppm) 8.59 (s, 1H), 8.41 – 8.17 (m, 2H), 7.74 – 7.59 (m, 2H), 7.49 – 7.42 (m, 2H), 7.23 (tt,  $J = 7.8, 1.1$  Hz, 2H), 7.08 – 6.91 (m, 2H), 4.13 (q,  $J = 7.0$  Hz, 2H), 2.64 (s, 3H), 1.47 (t,

$J = 7.0$  Hz, 3H).  $^{13}\text{C}$  NMR (100 MHz,  $\text{CDCl}_3$ ):  $\delta$  (ppm) 159.5, 159.2, 150.0, 141.4, 140.6, 139.4, 134.5, 131.3, 128.9, 125.4, 120.4, 117.9, 113.6, 84.2, 63.5, 14.8, 12.5. HR-MS (ESI): calcd for  $[\text{M}+\text{H}]^+$   $\text{C}_{21}\text{H}_{19}\text{IN}_3\text{O}$ : 456.0567; found: 456.0567.

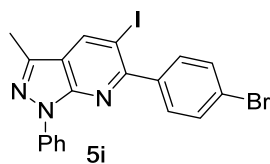

**6-(4-Bromophenyl)-5-iodo-3-methyl-1-phenyl-1H-pyrazolo[3,4-*b*]pyridine (5i)**, 66 mg, 68%, white solid, m.p. 167–168 °C.  $^1\text{H}$  NMR (400 MHz,  $\text{CDCl}_3$ ):  $\delta$  (ppm) 8.60 (s, 1H), 8.35 – 8.09 (m, 2H), 7.65 – 7.52 (m, 4H), 7.46 (ddd,  $J = 10.6, 5.7, 1.9$  Hz, 2H), 7.24 (dt,  $J = 7.8, 1.3$  Hz, 1H), 2.65 (s, 3H).  $^{13}\text{C}$  NMR (125 MHz,  $\text{CDCl}_3$ ):  $\delta$  (ppm) 158.3, 149.8, 141.4, 141.0, 140.7, 139.3, 131.5, 131.0, 129.0, 125.6, 123.3, 120.4, 118.4, 83.6, 12.5. HR-MS (ESI): calcd for  $[\text{M}+\text{H}]^+$   $\text{C}_{19}\text{H}_{14}\text{BrIN}_3$ : 489.9410; found: 489.9411.

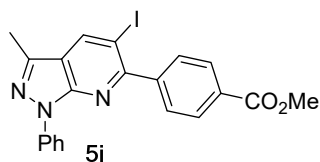

**Methyl 4-(5-iodo-3-methyl-1-phenyl-1H-pyrazolo[3,4-*b*]pyridin-6-yl)benzoate (5j)**, 60 mg, 64%, white solid, m.p. 182–183 °C.  $^1\text{H}$  NMR (400 MHz,  $\text{CDCl}_3$ ):  $\delta$  (ppm) 8.60 (s, 1H), 8.32 – 8.22 (m, 2H), 8.22 – 8.10 (m, 2H), 7.85 – 7.62 (m, 2H), 7.55 – 7.39 (m, 2H), 7.26 – 7.21 (m, 1H), 3.97 (s, 3H), 2.65 (s, 3H).  $^{13}\text{C}$  NMR (125 MHz,  $\text{CDCl}_3$ ):  $\delta$  (ppm) 166.7, 158.5, 149.7, 146.4, 141.5, 140.7, 139.3, 130.3, 129.9, 129.1, 129.0, 125.6, 120.4, 118.5, 83.4, 52.2, 12.5. HR-MS (ESI): calcd for  $[\text{M}+\text{H}]^+$   $\text{C}_{21}\text{H}_{17}\text{IN}_3\text{O}_2$ : 470.0360; found: 470.0362.

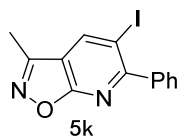

**5-Iodo-3-methyl-6-phenylisoxazolo[5,4-*b*]pyridine (5k)**, 42 mg, 63%, white solid, m.p. 119–120 °C.  $^1\text{H}$  NMR (400 MHz,  $\text{CDCl}_3$ ):  $\delta$  (ppm) 8.57 (s, 1H), 7.65 – 7.63 (m, 1H), 7.62 – 7.60 (m, 1H), 7.52 – 7.45 (m, 3H), 2.60 (s, 3H).  $^{13}\text{C}$  NMR (125 MHz,  $\text{CDCl}_3$ ):  $\delta$  (ppm) 169.1, 161.8, 154.5, 142.1, 141.0, 129.4, 129.3, 127.9, 114.7, 86.5, 10.8. HR-MS (ESI): calcd for  $[\text{M}+\text{H}]^+$   $\text{C}_{13}\text{H}_9\text{IN}_2\text{O}$ : 336.9832; found: 336.9833.

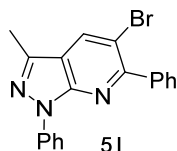

**5-Bromo-3-methyl-1,6-diphenyl-1H-pyrazolo[3,4-*b*]pyridine (5l)**, 44 mg, 66%, white solid, m.p. 151–152 °C.  $^1\text{H}$  NMR (400 MHz,  $\text{CDCl}_3$ ):  $\delta$  (ppm) 8.34 (s, 1H), 8.32 – 8.28 (m, 2H), 7.80 – 7.75 (m, 2H), 7.53 – 7.48 (m, 3H), 7.48 – 7.43 (m, 2H), 7.24 (d,  $J = 7.5$  Hz, 1H), 2.66 (s, 3H).  $^{13}\text{C}$  NMR (125 MHz,  $\text{CDCl}_3$ ):  $\delta$  (ppm) 156.8,

149.3, 141.6, 139.9, 139.4, 133.9, 129.8, 129.0, 128.8, 127.8, 125.5, 120.3, 117.5, 111.8, 12.50. HR-MS (ESI): calcd for  $[M+H]^+$   $C_{19}H_{15}BrN_3$ : 364.0444; found: 364.0445.

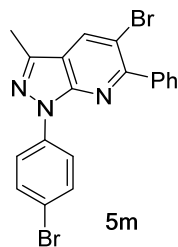

**5-Bromo-1-(4-bromophenyl)-3-methyl-6-phenyl-1H-pyrazolo[3,4-*b*]pyridine (5m)**, 55 mg, 63%, white solid, m.p. 178–179 °C.  $^1H$  NMR (400 MHz,  $CDCl_3$ ):  $\delta$  (ppm) 8.34 (s, 1H), 8.29 – 8.21 (m, 2H), 7.79 – 7.72 (m, 2H), 7.59 – 7.54 (m, 2H), 7.50 (dd,  $J$  = 5.0, 2.1 Hz, 3H), 2.64 (s, 3H).  $^{13}C$  NMR (125 MHz,  $CDCl_3$ ):  $\delta$  (ppm) 157.0, 149.3, 142.1, 139.8, 138.5, 134.0, 132.0, 129.8, 128.9, 127.9, 121.6, 118.5, 117.7, 112.1, 12.5. HR-MS (ESI): calcd for  $[M+H]^+$   $C_{19}H_{14}Br_2N_3$ : 441.9549; found: 441.9551.

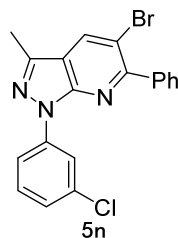

**5-Bromo-1-(3-chlorophenyl)-3-methyl-6-phenyl-1H-pyrazolo[3,4-*b*]pyridine (5n)**, 49 mg, 62%, white solid, m.p. 143–144 °C.  $^1H$  NMR (400 MHz,  $CDCl_3$ ):  $\delta$  (ppm) 8.39 – 8.33 (m, 3H), 7.81 – 7.74 (m, 2H), 7.54 – 7.48 (m, 3H), 7.38 (td,  $J$  = 8.0, 0.5 Hz, 1H), 7.21 (ddd,  $J$  = 8.0, 2.0, 1.0 Hz, 1H), 2.65 (s, 3H).  $^{13}C$  NMR (125 MHz,  $CDCl_3$ ):  $\delta$  (ppm) 157.0, 149.4, 142.3, 140.4, 139.7, 134.7, 134.1, 130.1, 129.8, 129.02, 127.9, 125.3, 120.1, 117.9, 117.7, 112.2, 99.9, 12.5. HR-MS (ESI): calcd for  $[M+H]^+$   $C_{19}H_{14}BrClN_3$ : 397.0054; found: 397.0056.

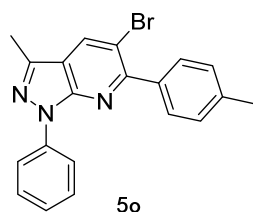

**5-Bromo-3-methyl-1-phenyl-6-(*p*-tolyl)-1H-pyrazolo[3,4-*b*]pyridine (5o)**, 46 mg, 61%, white solid, m.p. 124–125 °C.  $^1H$  NMR (400 MHz,  $CDCl_3$ ):  $\delta$  (ppm) 8.32 (s, 1H), 8.32 – 8.29 (m, 2H), 7.72 – 7.66 (m, 2H), 7.49 – 7.43 (m, 2H), 7.35 – 7.29 (m, 2H), 7.25 – 7.19 (m, 1H), 2.65 (s, 3H), 2.45 (s, 3H).  $^{13}C$  NMR (125 MHz,  $CDCl_3$ ):  $\delta$  (ppm) 156.8, 141.6, 139.5, 138.9, 137.1, 135.6, 129.8, 129.0, 128.6, 126.6, 125.4, 120.3, 117.4, 111.8, 21.4, 12.5. HR-MS (ESI): calcd for  $[M+H]^+$   $C_{20}H_{17}BrN_3$ : 378.0600; found: 378.0601.

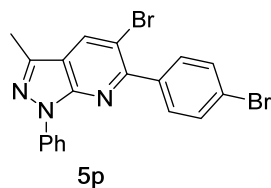

**5-Bromo-6-(4-bromophenyl)-3-methyl-1-phenyl-1H-pyrazolo[3,4-*b*]pyridine (5p)**, 53 mg, 60%, white solid, m.p. 181–182 °C. <sup>1</sup>H NMR (400 MHz, CDCl<sub>3</sub>): δ (ppm) 8.34 (s, 1H), 8.30 – 8.21 (m, 2H), 7.70 – 7.60 (m, 4H), 7.51 – 7.41 (m, 2H), 7.26 – 7.23 (m, 1H), 2.66 (s, 3H). <sup>13</sup>C NMR (125 MHz, CDCl<sub>3</sub>): δ (ppm) 155.6, 149.2, 141.7, 139.3, 138.7, 134.1, 131.5, 131.1, 129.0, 125.6, 123.4, 120.4, 117.6, 111.4, 12.5. HR-MS (ESI): calcd for [M+H]<sup>+</sup> C<sub>19</sub>H<sub>14</sub>Br<sub>2</sub>N<sub>3</sub>: 441.9549; found: 441.9549.

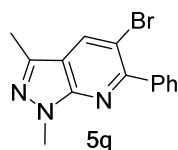

**5-Bromo-1,3-dimethyl-6-phenyl-1H-pyrazolo[3,4-*b*]pyridine (5q)**, 39 mg, 64%, white solid, m.p. 118–119 °C. <sup>1</sup>H NMR (400 MHz, CDCl<sub>3</sub>): δ (ppm) 8.27 (s, 1H), 7.70 (dd, *J* = 2.4, 1.6 Hz, 1H), 7.69 (dd, *J* = 2.7, 1.2 Hz, 1H), 7.51 – 7.48 (m, 1H), 7.48 – 7.43 (m, 2H), 4.07 (s, 3H), 2.57 (s, 3H). <sup>13</sup>C NMR (125 MHz, CDCl<sub>3</sub>): δ (ppm) 156.6, 149.7, 140.0, 139.5, 133.6, 129.5, 128.8, 127.9, 115.4, 110.8, 33.7, 12.4. HR-MS (ESI): calcd for [M+H]<sup>+</sup> C<sub>14</sub>H<sub>13</sub>BrN<sub>3</sub>: 302.0287; found: 302.0288.

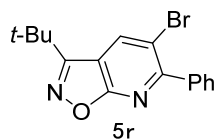

**5-Bromo-3-(*tert*-butyl)-6-phenylisoxazolo[5,4-*b*]pyridine (5r)**, 35 mg, 53%, white solid, m.p. 126–127 °C. <sup>1</sup>H NMR (400 MHz, CDCl<sub>3</sub>): δ (ppm) 8.44 (s, 1H), 7.77 – 7.69 (m, 2H), 7.52 – 7.47 (m, 3H), 1.56 (s, 9H). <sup>13</sup>C NMR (125 MHz, CDCl<sub>3</sub>): δ (ppm) 168.7, 165.3, 158.3, 138.6, 137.0, 129.6, 129.5, 128.0, 113.8, 112.3, 34.2, 28.9. HR-MS (ESI): calcd for [M+H]<sup>+</sup> C<sub>16</sub>H<sub>16</sub>BrN<sub>2</sub>O: 331.0441; found: 331.0442.

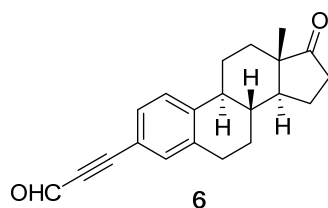

**3-((8R,9S,13S,14S)-13-Methyl-17-oxo-7,8,9,11,12,13,14,15,16,17-decahydro-6H-cyclopenta[*a*]phenanthren-3-yl)propionaldehyde (6)**, 826 mg, 54%, white solid, m.p. 190–192 °C. <sup>1</sup>H NMR (400 MHz, CDCl<sub>3</sub>): δ (ppm) 9.40 (s, 1H), 7.39 (dd, *J* = 8.1, 1.4 Hz, 1H), 7.36 – 7.30 (m, 2H), 2.91 (dd, *J* = 9.7, 5.1 Hz, 2H), 2.51 (dd, *J* = 18.7, 8.7 Hz, 1H), 2.45 – 2.38 (m, 1H), 2.32 (td, *J* = 11.7, 10.5, 4.3 Hz, 1H), 2.21 – 2.12 (m, 1H), 2.11 – 1.95 (m, 3H), 1.63 (m, 3H), 1.56 – 1.47 (m, 3H), 0.91 (s, 3H). <sup>13</sup>C NMR (100 MHz, CDCl<sub>3</sub>): δ (ppm) 220.4, 176.7, 143.9, 137.2, 133.8, 130.6, 125.8, 116.6, 95.8, 88.3, 50.4, 47.8, 44.6, 37.7, 35.7, 31.4, 28.9, 26.1, 25.4, 21.5, 13.7. HR-MS

(ESI): calcd for  $[M+H]^+$   $C_{21}H_{23}O_2$ : 307.1693; found: 307.1694. The experimental data of **6** match with those reported in the literature [50].

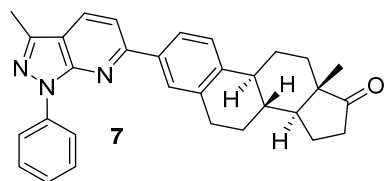

**(8R,9S,13S,14S)-13-Methyl-3-(3-methyl-1-phenyl-1H-pyrazolo[3,4-b]pyridin-6-yl)-6,7,8,9,11,12,13,14,15,16-decahydro-17H-cyclopenta[a]phenanthren-17-one (7)**, 48 mg, 52%, white solid, m.p. 199-201 °C.  $^1H$  NMR (400 MHz,  $CDCl_3$ ):  $\delta$  (ppm) 8.43 (d,  $J = 7.6$  Hz, 2H), 8.05 (d,  $J = 8.3$  Hz, 1H), 7.94 (dd,  $J = 8.2, 1.9$  Hz, 1H), 7.87 (d,  $J = 1.7$  Hz, 1H), 7.63 (d,  $J = 8.4$  Hz, 1H), 7.57 – 7.50 (m, 2H), 7.44 (d,  $J = 8.1$  Hz, 1H), 7.31 – 7.26 (m, 1H), 3.04 (dd,  $J = 10.6, 4.6$  Hz, 2H), 2.65 (s, 3H), 2.59 – 2.50 (m, 1H), 2.48 (d,  $J = 9.3$  Hz, 1H), 2.42 – 2.33 (m, 1H), 2.22 – 2.12 (m, 1H), 2.08 (m, 2H), 2.04 – 1.98 (m, 1H), 1.69 – 1.50 (m, 6H), 0.94 (s, 3H).  $^{13}C$  NMR (100 MHz,  $CDCl_3$ ):  $\delta$  (ppm) 220.7, 156.7, 151.0, 142.5, 141.3, 139.8, 136.8, 136.8, 129.7, 128.9, 128.0, 125.8, 125.0, 124.9, 120.4, 115.6, 114.2, 50.5, 47.9, 44.4, 38.0, 35.8, 31.5, 29.5, 26.4, 25.6, 21.5, 13.8, 12.5. HR-MS (ESI): calcd for  $[M+H]^+$   $C_{31}H_{32}N_3O$ : 462.2540; found: 462.2542.

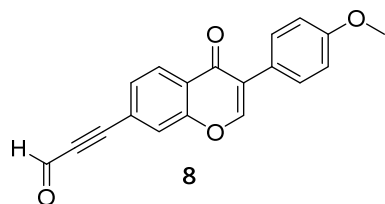

**3-(3-(4-Methoxyphenyl)-4-oxo-4H-chromen-7-yl)propionaldehyde (8)**, 852 mg, 56%, yellow solid, m.p. 164-166 °C.  $^1H$  NMR (400 MHz,  $CDCl_3$ ):  $\delta$  (ppm) 9.47 (s, 1H), 8.33 (dd,  $J = 8.2, 0.5$  Hz, 1H), 8.02 (s, 1H), 7.73 (dd,  $J = 1.4, 0.5$  Hz, 1H), 7.58 (dd,  $J = 8.2, 1.5$  Hz, 1H), 7.51 – 7.48 (m, 2H), 7.00 – 6.97 (m, 2H), 3.84 (s, 3H).  $^{13}C$  NMR (100 MHz,  $CDCl_3$ ):  $\delta$  (ppm) 176.2, 175.5, 159.8, 155.4, 152.7, 130.0, 128.7, 127.0, 125.8, 125.6, 124.3, 123.3, 122.9, 114.0, 91.6, 89.7, 55.3. HR-MS (ESI): calcd for  $[M+H]^+$   $C_{19}H_{13}O_4$ : 305.0808; found: 305.0810.

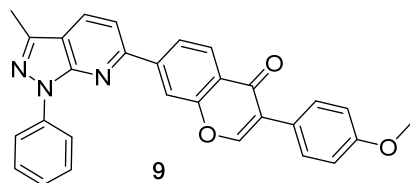

**3-(4-Methoxyphenyl)-7-(3-methyl-1-phenyl-1H-pyrazolo[3,4-b]pyridin-6-yl)-4H-chromen-4-one (9)**, 66 mg, 72%, yellow solid, m.p. 213-215 °C.  $^1H$  NMR (400 MHz,  $CDCl_3$ ):  $\delta$  (ppm) 8.49 – 8.35 (m, 3H), 8.28 (d,  $J = 1.6$  Hz, 1H), 8.19 (dd,  $J = 8.4, 1.6$  Hz, 1H), 8.15 (d,  $J = 8.3$  Hz, 1H), 8.06 (s, 1H), 7.76 (d,  $J = 8.3$  Hz, 1H), 7.59 – 7.52 (m, 4H), 7.35 – 7.28 (m, 1H), 7.04 – 6.95 (m, 2H), 3.86 (s, 3H), 2.69 (s, 3H).  $^{13}C$  NMR (100 MHz,  $CDCl_3$ ):  $\delta$  (ppm) 176.2, 159.6, 156.4, 154.2, 152.8, 150.8, 144.3, 142.6, 139.5, 130.3, 130.0, 129.0, 126.8, 125.5, 125.2, 124.6, 120.6, 116.9, 116.5,

114.5, 114.0, 55.3, 12.5. HR-MS (ESI): calcd for  $[M+H]^+$   $C_{29}H_{22}N_3O_3$ : 460.1656; found: 460.1657.

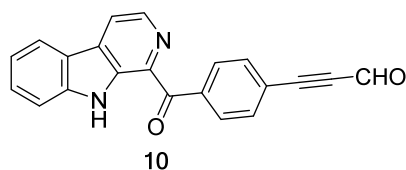

**3-(4-(9H-Pyrido[3,4-b]indole-1-carbonyl)phenyl)propionaldehyde (10)**, 892 mg, 55%, yellow solid, m.p. 185-187 °C.  $^1H$  NMR (400 MHz,  $CDCl_3$ ):  $\delta$  (ppm) 10.45 (s, 1H), 9.48 (s, 1H), 8.60 (d,  $J = 4.9$  Hz, 1H), 8.37 (d,  $J = 8.4$  Hz, 2H), 8.22 – 8.16 (m, 2H), 7.76 (d,  $J = 8.4$  Hz, 2H), 7.64 – 7.61 (m, 2H), 7.37 (m, 1H).  $^{13}C$  NMR (100 MHz,  $CDCl_3$ ):  $\delta$  (ppm) 194.2, 176.6, 141.0, 139.5, 138.1, 137.3, 135.6, 132.6, 131.9, 131.3, 129.4, 122.9, 121.9, 121.0, 120.7, 118.9, 112.0, 93.8, 89.6. HR-MS (ESI): calcd for  $[M+H]^+$   $C_{21}H_{13}N_2O_2$ : 325.0972; found: 325.0974.

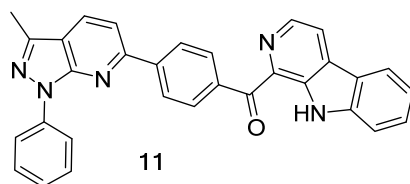

**(4-(3-Methyl-1-phenyl-1H-pyrazolo[3,4-b]pyridin-6-yl)phenyl)(9H-pyrido[3,4-b]indol-1-yl)methanone (11)**, 67 mg, 70%, yellow solid, m.p. 239-241 °C.  $^1H$  NMR (400 MHz,  $DMSO-d_6$ ):  $\delta$  (ppm) 11.99 (s, 1H), 8.43 (d,  $J = 4.9$  Hz, 1H), 8.35 – 8.29 (m, 2H), 8.29 – 8.25 (m, 5H), 8.24 – 8.17 (m, 2H), 7.89 (d,  $J = 8.4$  Hz, 1H), 7.74 – 7.68 (m, 1H), 7.53 – 7.43 (m, 3H), 7.20 (m, 2H), 3.21 (s, 3H).  $^{13}C$  NMR (100 MHz,  $DMSO-d_6$ ):  $\delta$  (ppm) 193.7, 155.4, 150.8, 143.4, 142.2, 142.0, 139.7, 138.6, 137.7, 136.7, 136.3, 132.1, 131.9, 131.6, 129.7, 129.5, 127.3, 125.7, 122.3, 120.7, 120.5, 120.3, 119.5, 115.5, 113.5, 79.6, 12.7. HR-MS (ESI): calcd for  $[M+H]^+$   $C_{31}H_{22}N_5O$ : 480.1819; found: 480.1820.

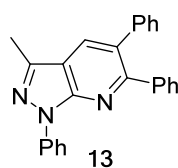

**3-Methyl-1,5,6-triphenyl-1H-pyrazolo[3,4-b]pyridine (13)**, 63 mg, 88%, yellow solid, m.p. 185-186 °C.  $^1H$  NMR (400 MHz,  $CDCl_3$ ):  $\delta$  (ppm) 8.48 – 8.40 (m, 2H), 8.05 (s, 1H), 7.56 – 7.45 (m, 4H), 7.34 – 7.18 (m, 10H), 2.69 (s, 3H).  $^{13}C$  NMR (125 MHz,  $CDCl_3$ ):  $\delta$  (ppm) 157.2, 150.1, 142.6, 140.6, 140.3, 139.8, 131.5, 130.5, 130.4, 130.4, 129.9, 128.9, 128.3, 128.0, 127.7, 126.9, 125.1, 120.3, 115.9, 12.6. HR-MS (ESI): calcd for  $[M+H]^+$   $C_{25}H_{20}N_3$ : 362.1652; found: 362.1653.

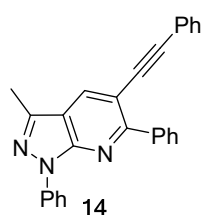

**3-Methyl-1,6-diphenyl-5-(phenylethynyl)-1*H*-pyrazolo[3,4-*b*]pyridine (14)**, 65 mg, 85%, yellow solid, m.p.147-148 °C. <sup>1</sup>H NMR (400 MHz, CDCl<sub>3</sub>): δ (ppm) 8.42 – 8.35 (m, 2H), 8.32 (s, 1H), 8.19 – 8.11 (m, 2H), 7.56 – 7.51 (m, 3H), 7.51 – 7.48 (m, 2H), 7.44 – 7.39 (m, 2H), 7.36 – 7.31 (m, 3H), 7.29 – 7.25 (m, 1H), 2.68 (s, 3H). <sup>13</sup>C NMR (125 MHz, CDCl<sub>3</sub>): δ (ppm) 159.2, 149.4, 142.6, 139.5, 134.3, 131.1, 129.9, 129.1, 128.9, 128.4, 128.3, 127.8, 125.4, 123.2, 120.4, 115.4, 111.6, 92.9, 88.3, 12.5. HR-MS (ESI): calcd for [M+H]<sup>+</sup> C<sub>27</sub>H<sub>20</sub>N<sub>3</sub>: 386.1652; found: 386.1655.

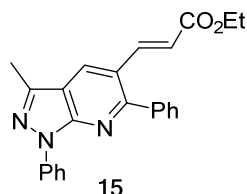

**Ethyl (*E*)-3-(3-methyl-1,6-diphenyl-1*H*-pyrazolo[3,4-*b*]pyridin-5-yl)acrylate (15)**, 57 mg, 75%, yellow solid, m.p.165-166 °C. <sup>1</sup>H NMR (400 MHz, CDCl<sub>3</sub>): δ (ppm) 8.39 – 8.34 (m, 2H), 8.32 (s, 1H), 7.90 (dd, *J* = 15.9, 0.5 Hz, 1H), 7.69 – 7.65 (m, 2H), 7.56 – 7.45 (m, 5H), 7.28 – 7.23 (m, 1H), 6.48 (d, *J* = 15.8 Hz, 1H), 4.26 (q, *J* = 7.1 Hz, 2H), 2.69 (s, 3H), 1.32 (t, *J* = 7.1 Hz, 3H). <sup>13</sup>C NMR (125 MHz, CDCl<sub>3</sub>): δ (ppm) 166.5, 158.9, 150.5, 143.2, 143.2, 139.5, 139.2, 130.3, 129.1, 129.0, 128.6, 128.3, 125.5, 122.9, 120.4, 118.7, 116.2, 60.5, 14.3, 12.5. HR-MS (ESI): calcd for [M+H]<sup>+</sup> C<sub>24</sub>H<sub>22</sub>N<sub>3</sub>O<sub>2</sub>: 384.1707; found: 384.1708.

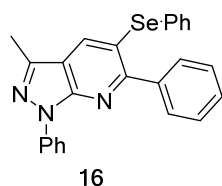

**3-Methyl-1,6-diphenyl-5-(phenylselanyl)-1*H*-pyrazolo[3,4-*b*]pyridine (16)**, 68 mg, 78%, yellow solid, m.p.124-125 °C. <sup>1</sup>H NMR (400 MHz, CDCl<sub>3</sub>): δ (ppm) 8.36 – 8.29 (m, 2H), 8.02 (s, 1H), 7.73 – 7.66 (m, 2H), 7.46 (tdd, *J* = 7.2, 3.8, 2.0 Hz, 5H), 7.43 – 7.38 (m, 2H), 7.32 – 7.26 (m, 3H), 7.25 – 7.20 (m, 1H), 2.55 (s, 3H). <sup>13</sup>C NMR (125 MHz, CDCl<sub>3</sub>): δ (ppm) 159.5, 149.8, 141.9, 140.8, 139.6, 134.6, 133.6, 131.1, 129.56, 129.34, 128.9, 128.8, 127.9, 127.9, 125.3, 117.2, 12.4. HR-MS (ESI): calcd for [M+H]<sup>+</sup> C<sub>25</sub>H<sub>20</sub>N<sub>3</sub>Se: 442.0817; found: 442.0820.

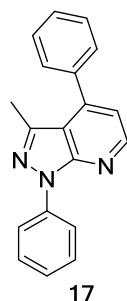

**3-Methyl-1,4-diphenyl-1*H*-pyrazolo[3,4-*b*]pyridine (17)**, 26 mg, 45%, white solid, m.p. 126-128 °C. <sup>1</sup>H NMR (400 MHz, CDCl<sub>3</sub>): δ (ppm) 8.59 (d, *J* = 4.7 Hz, 1H), 8.26 (dd, *J* = 8.7, 1.1 Hz, 2H), 7.54 (dd, *J* = 7.0, 1.5 Hz, 2H), 7.50 (m, 5H), 7.33 – 7.27 (m, 1H), 7.07 (d, *J* = 4.7 Hz, 1H), 2.31 (s, 3H). <sup>13</sup>C NMR (100 MHz, CDCl<sub>3</sub>): δ (ppm)

151.2, 148.6, 146.1, 142.4, 139.4, 137.4, 128.9, 128.6, 128.2, 125.6, 121.3, 117.7, 114.7, 15.4. HR-MS (ESI): calcd for  $[M+H]^+$   $C_{19}H_{16}N_3$ : 286.1339; found: 286.1340. The experimental data of **17** match with those reported in the literature [56].

## 5. Copy of $^1\text{H}$ and $^{13}\text{C}$ NMR Spectra of Products

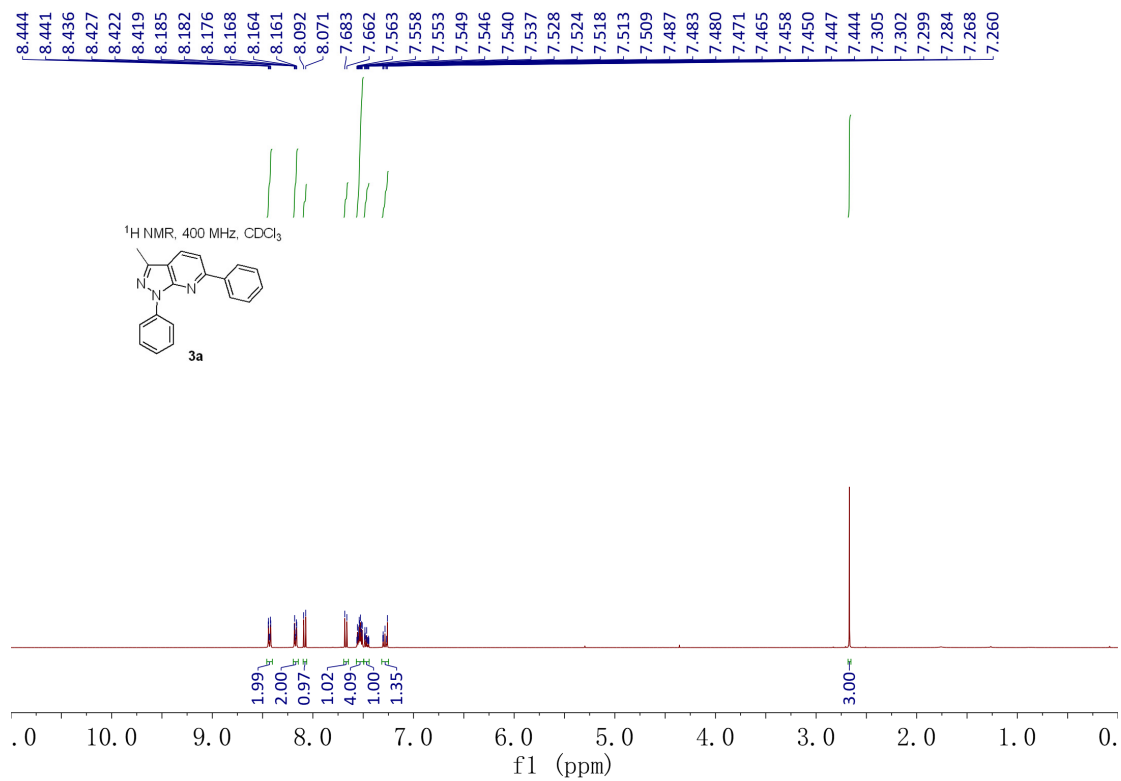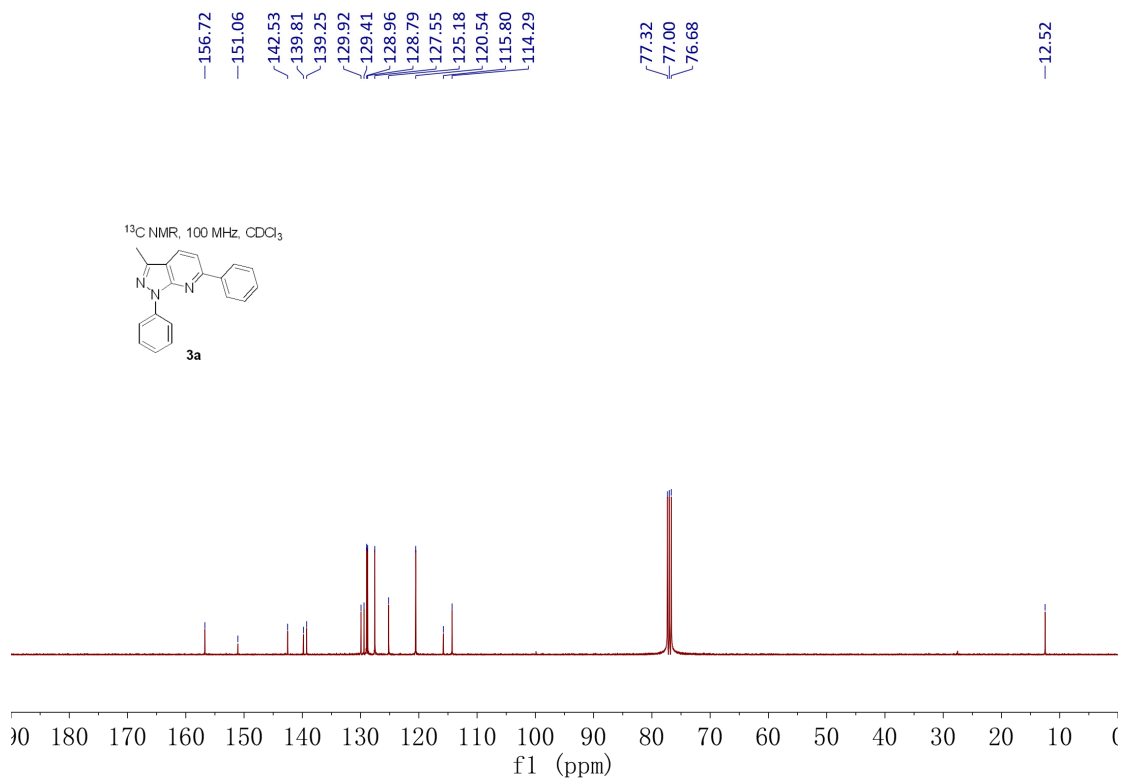

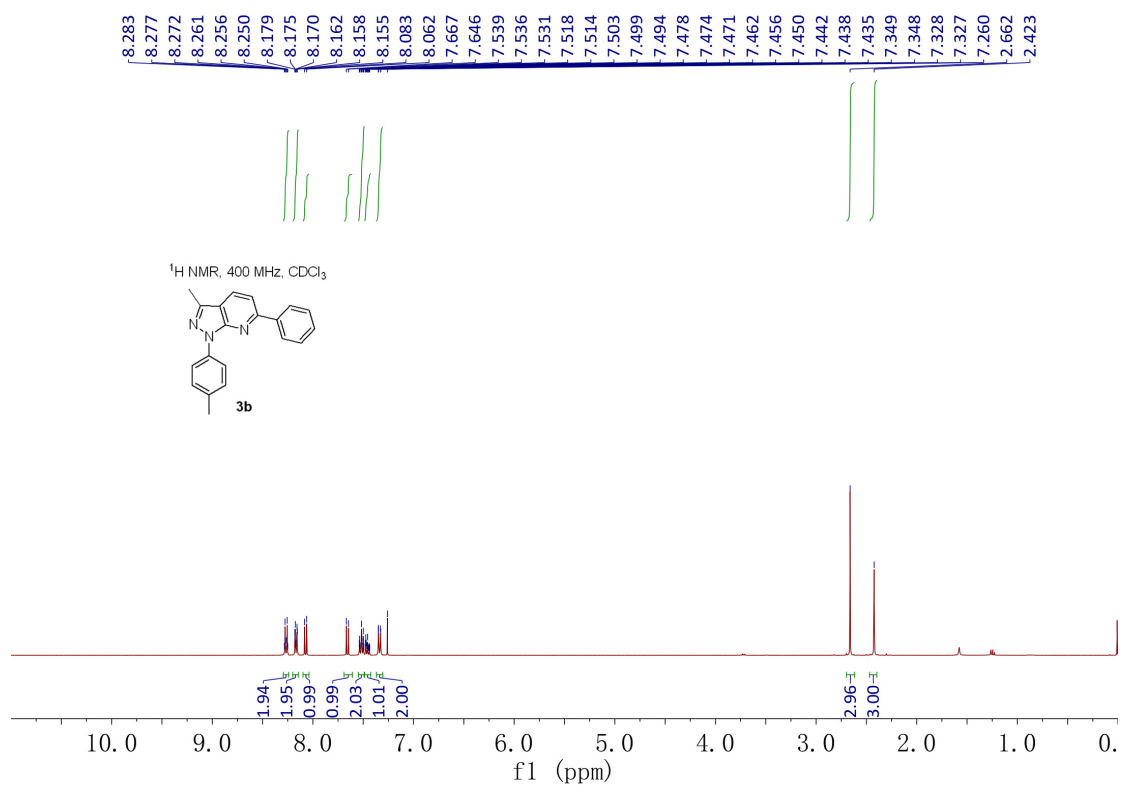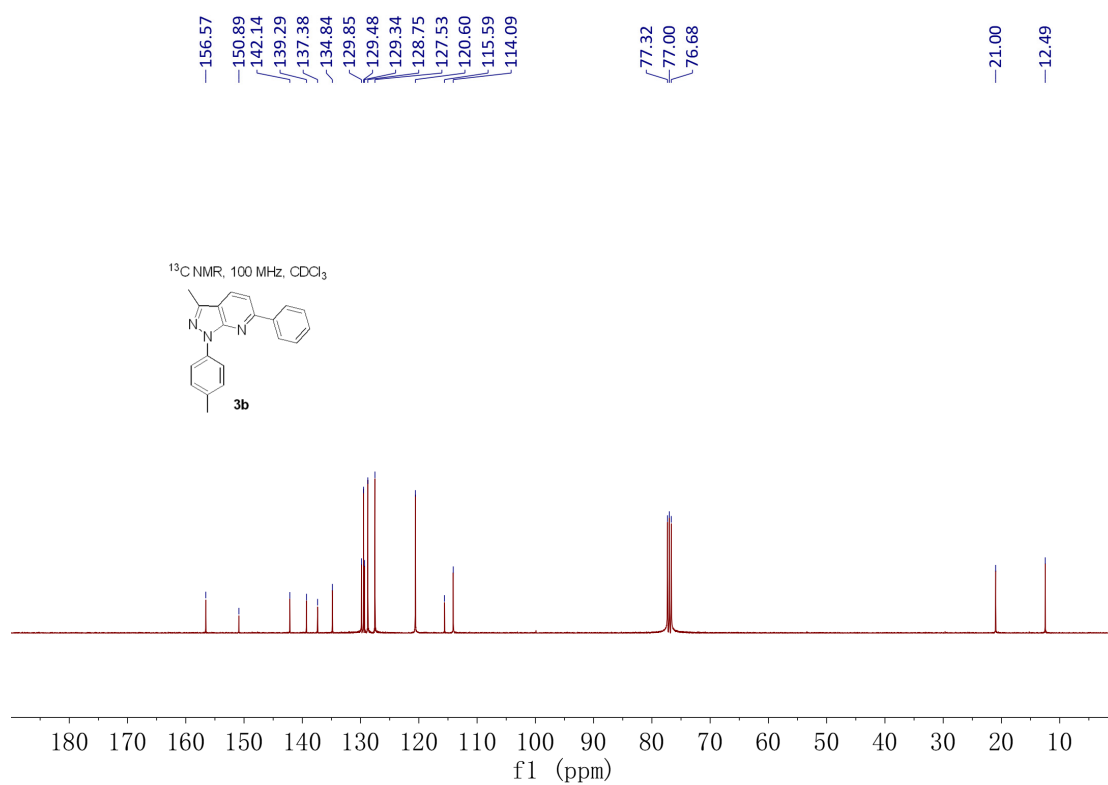

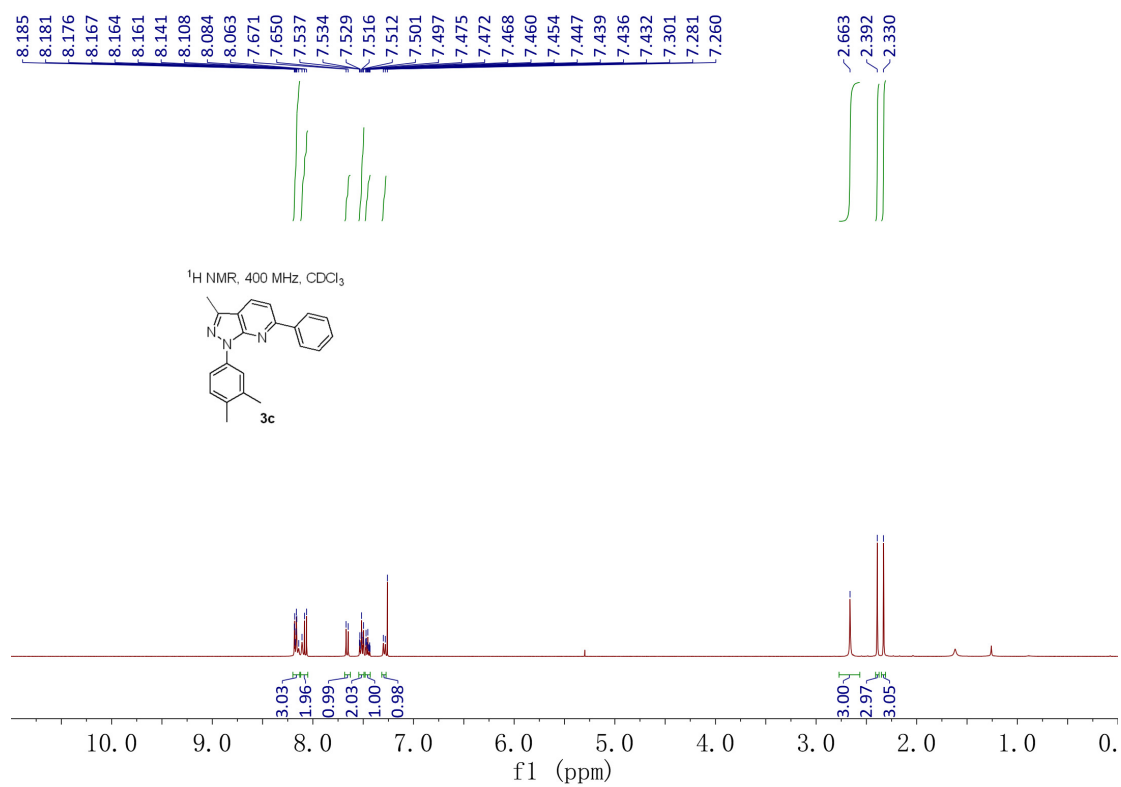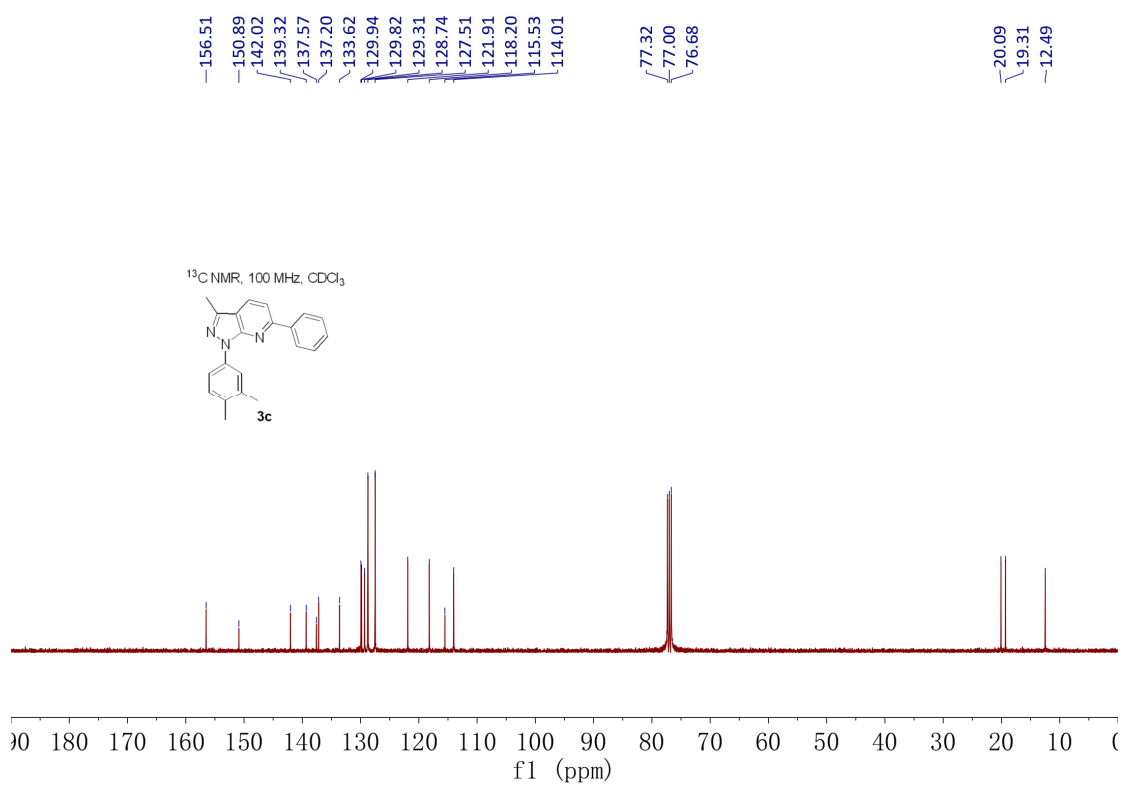

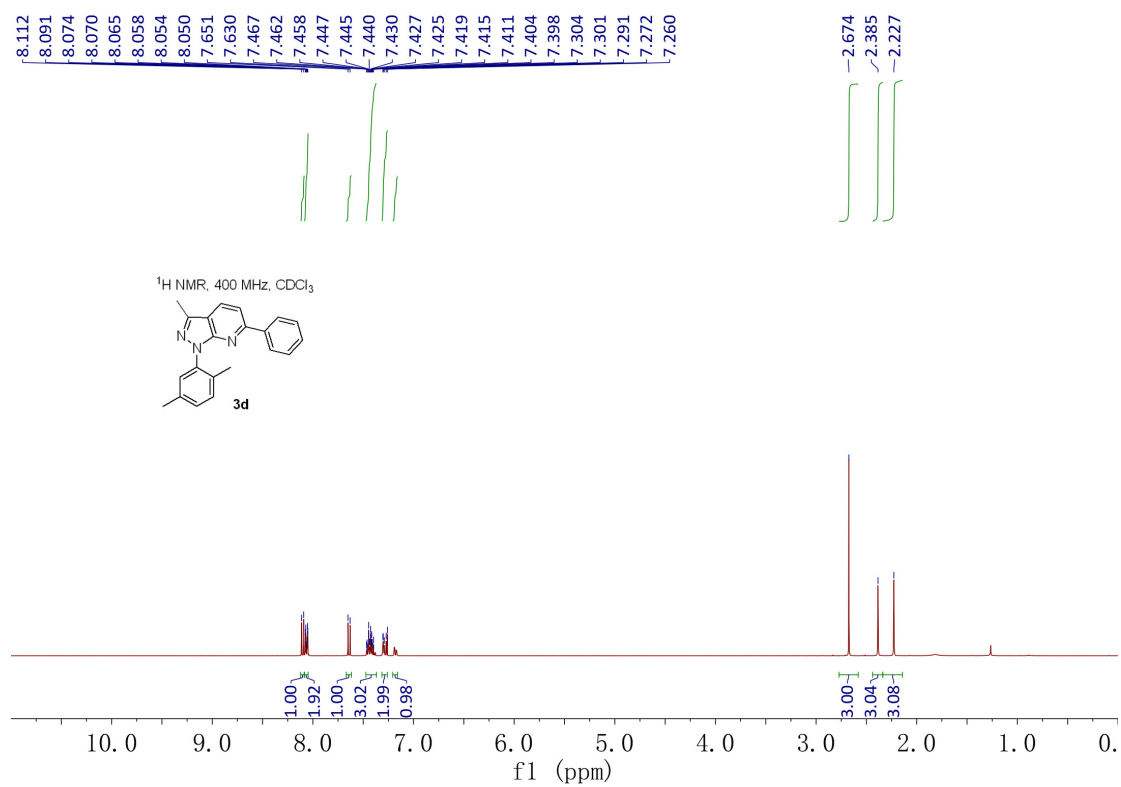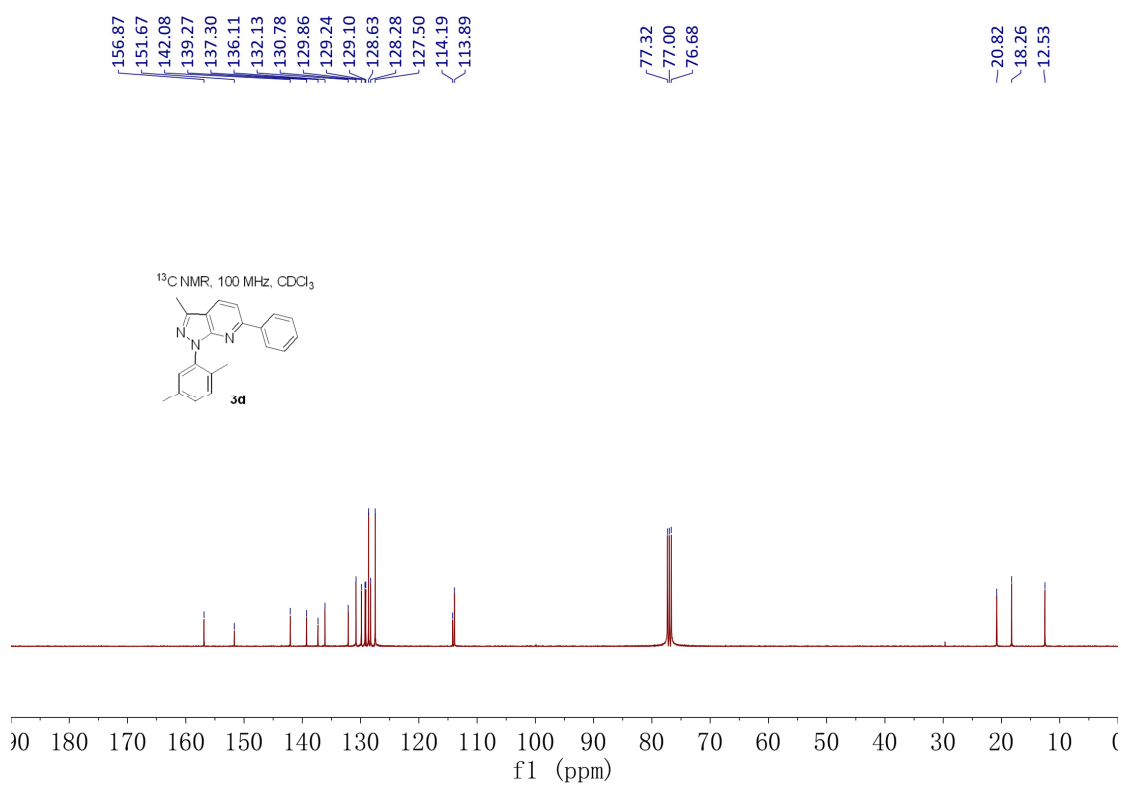

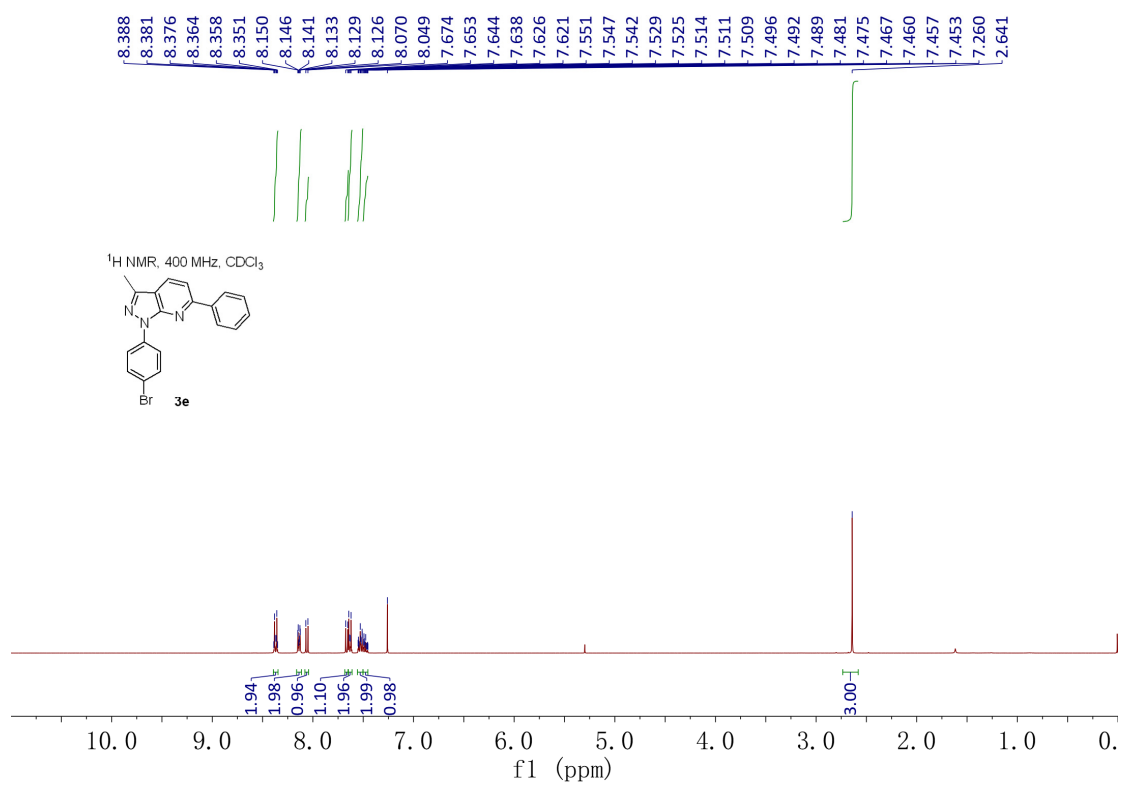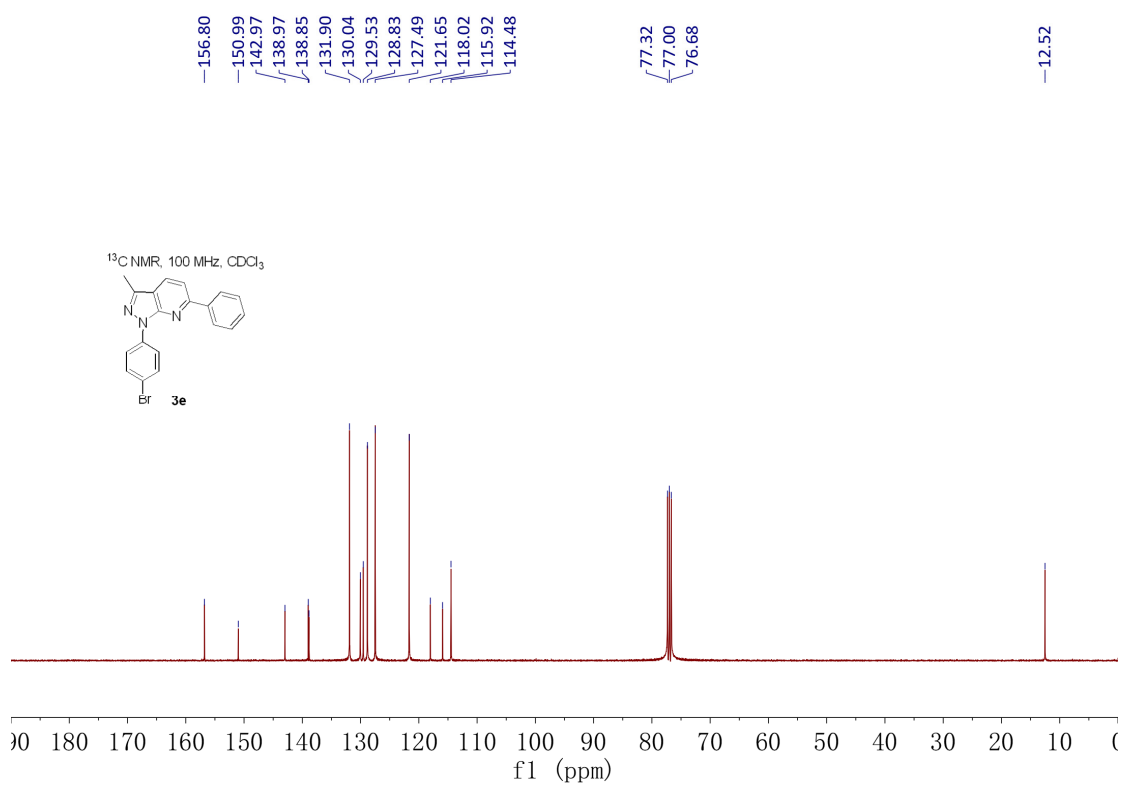

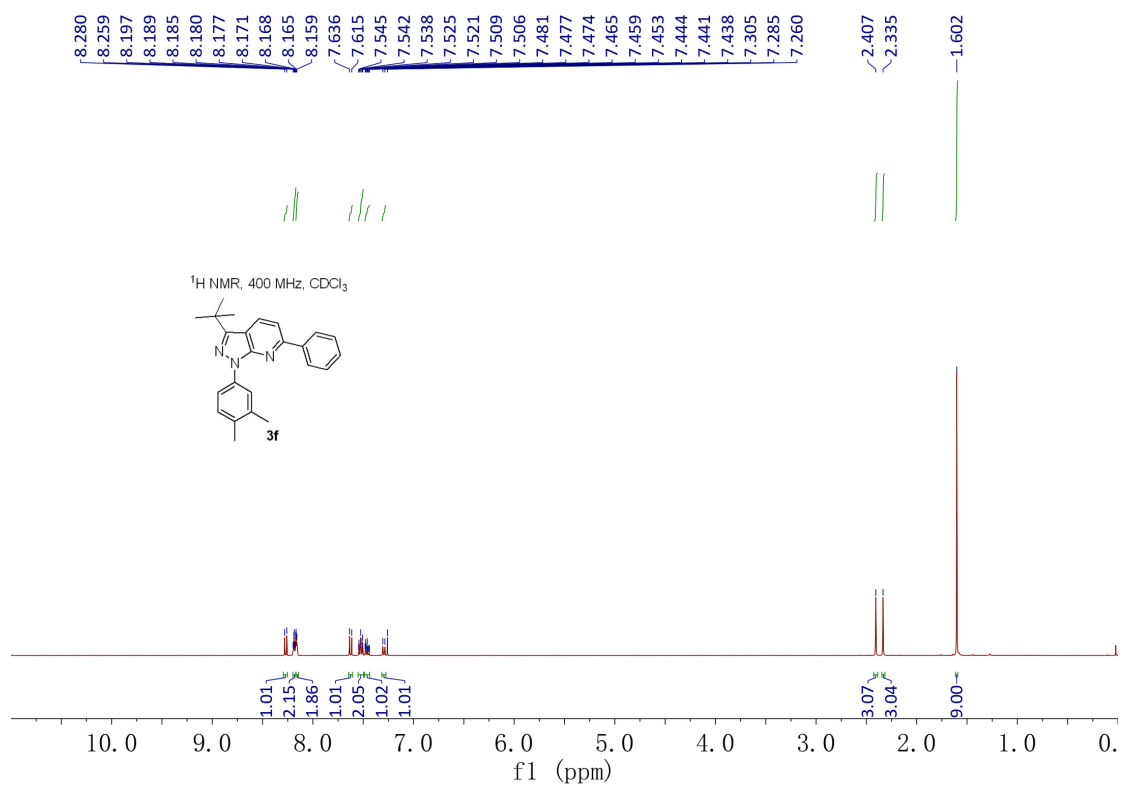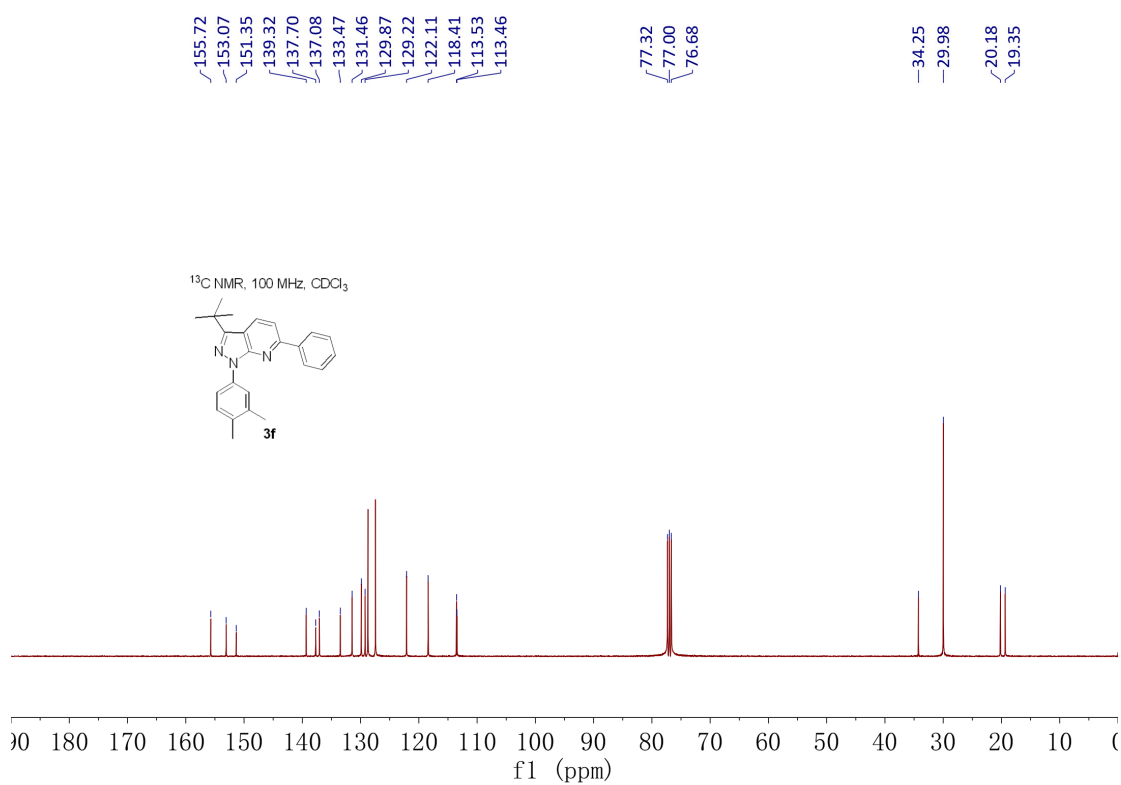

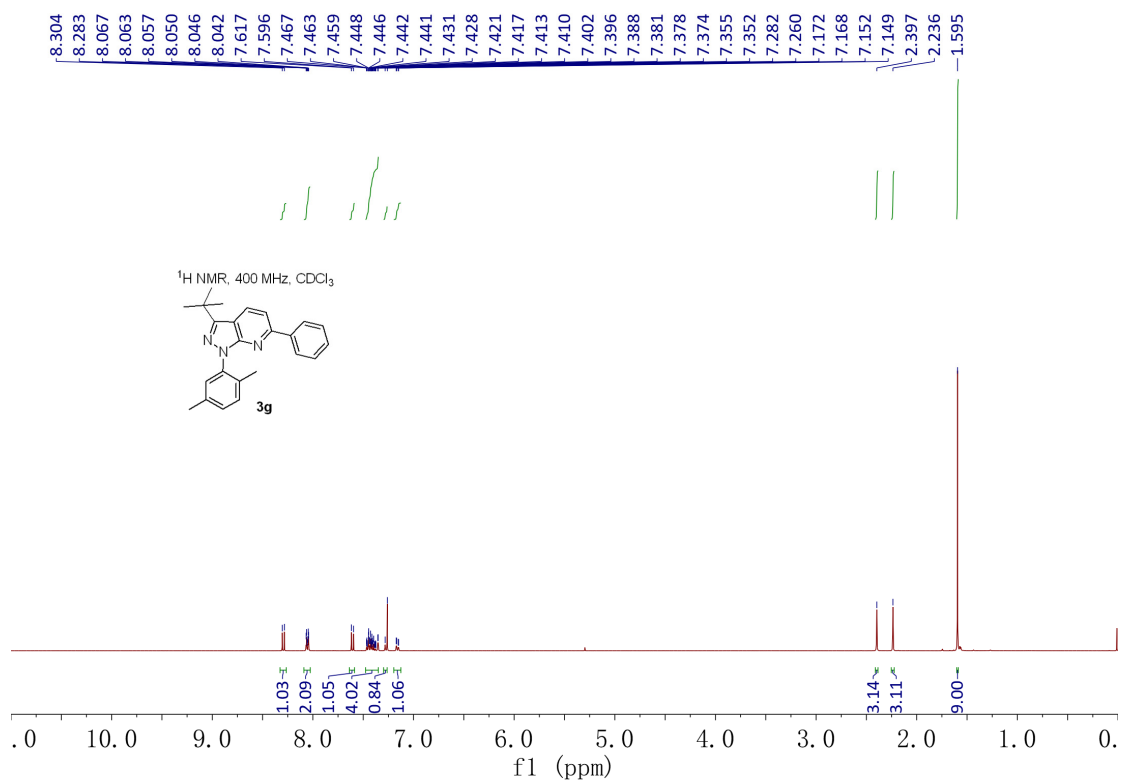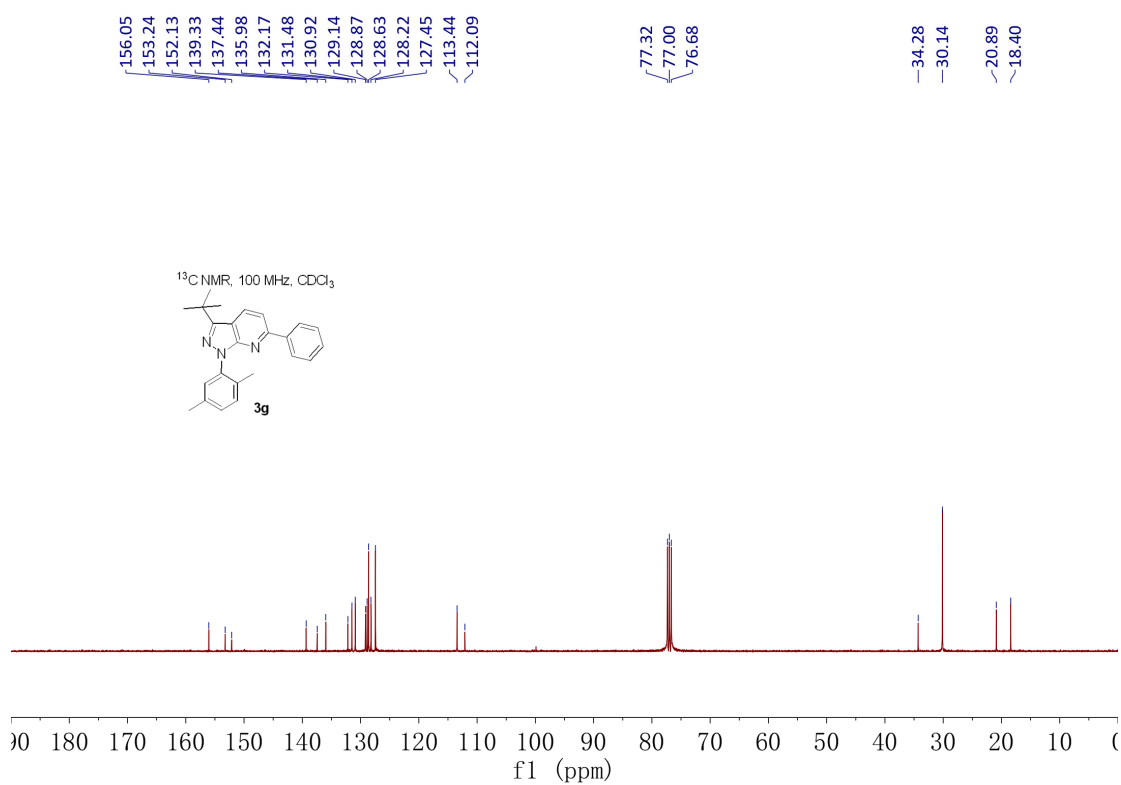

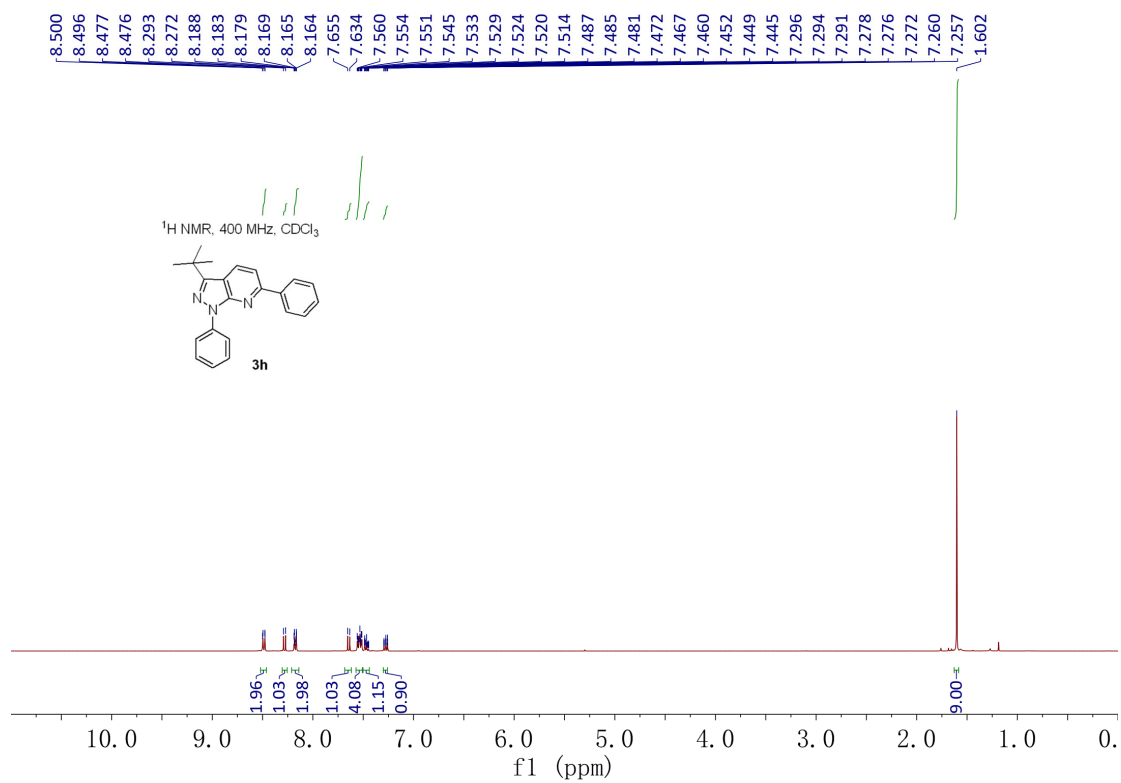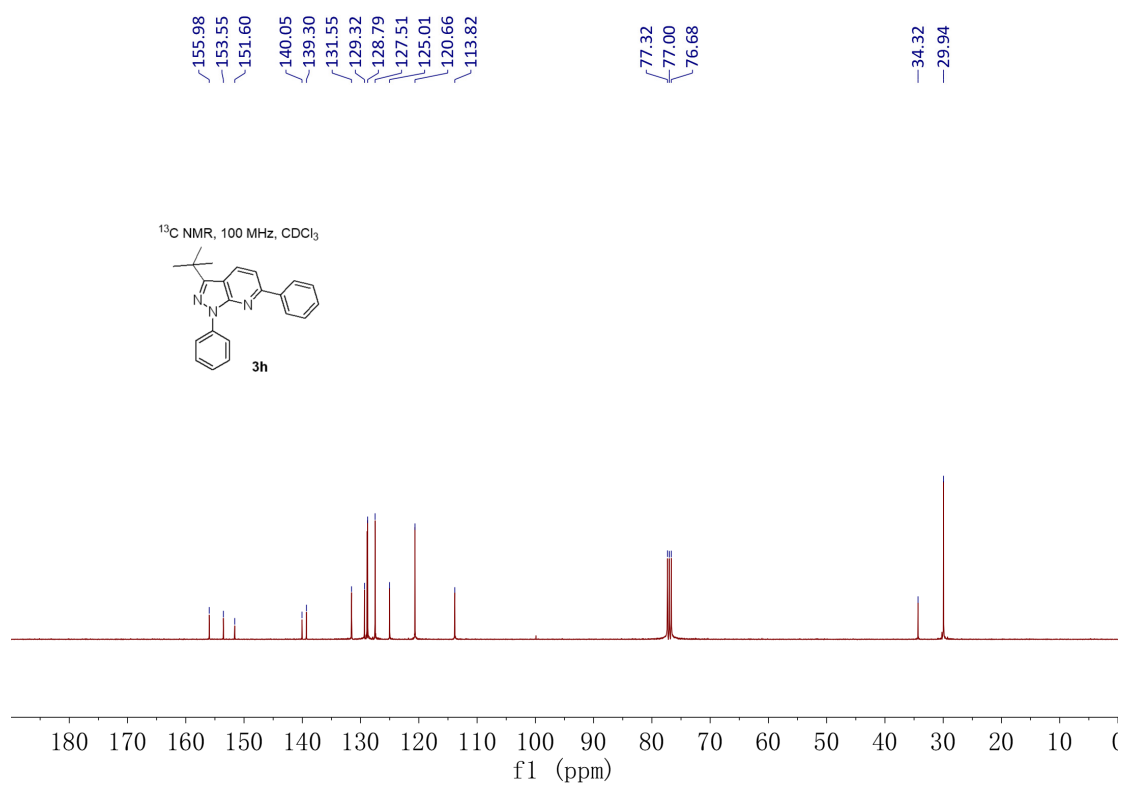

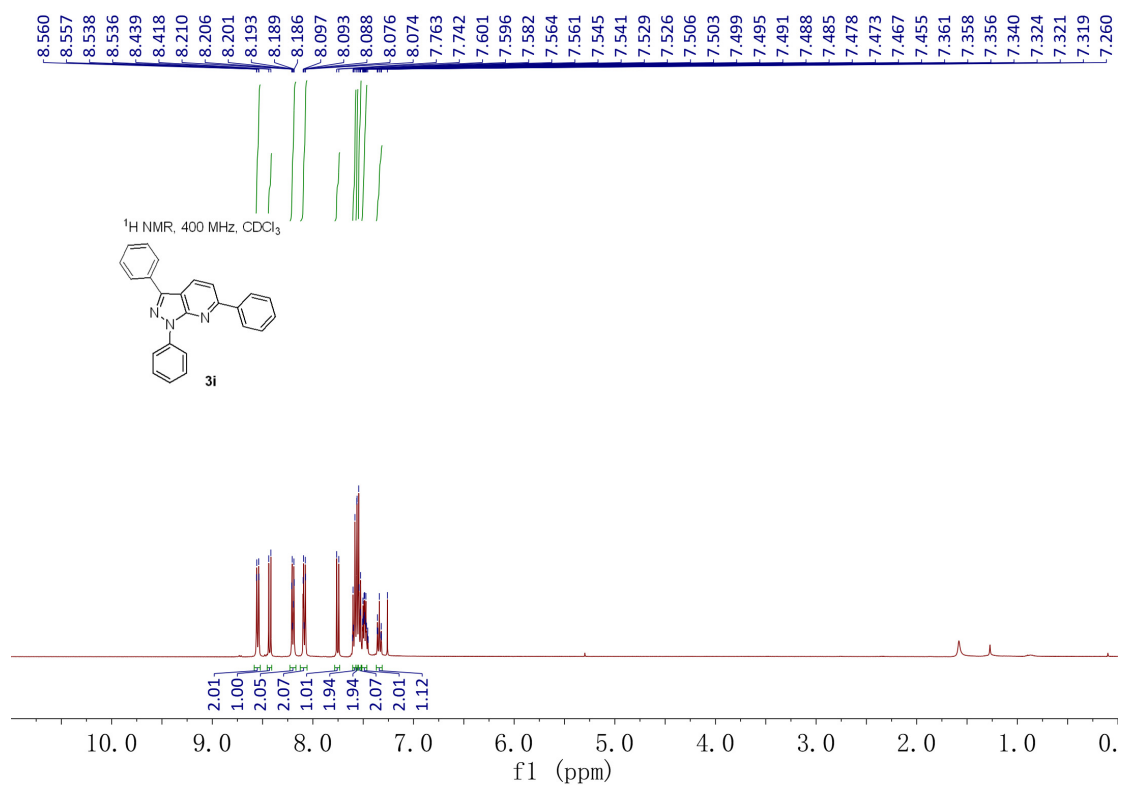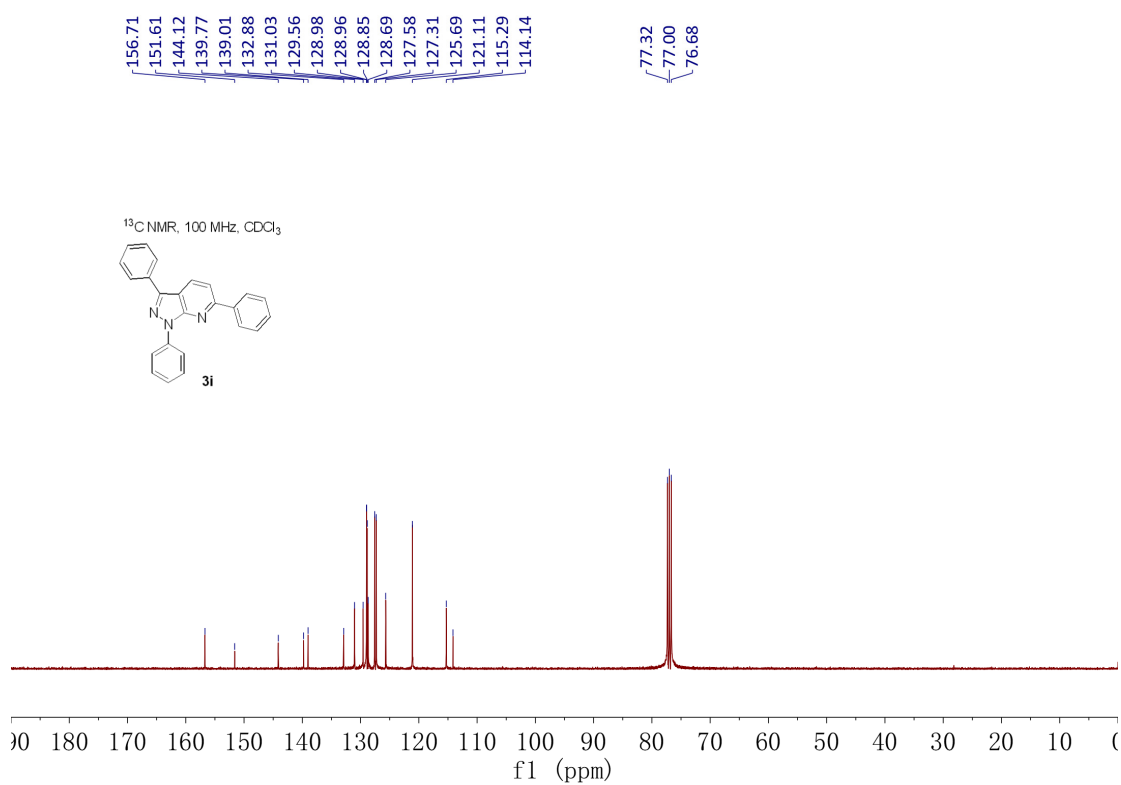

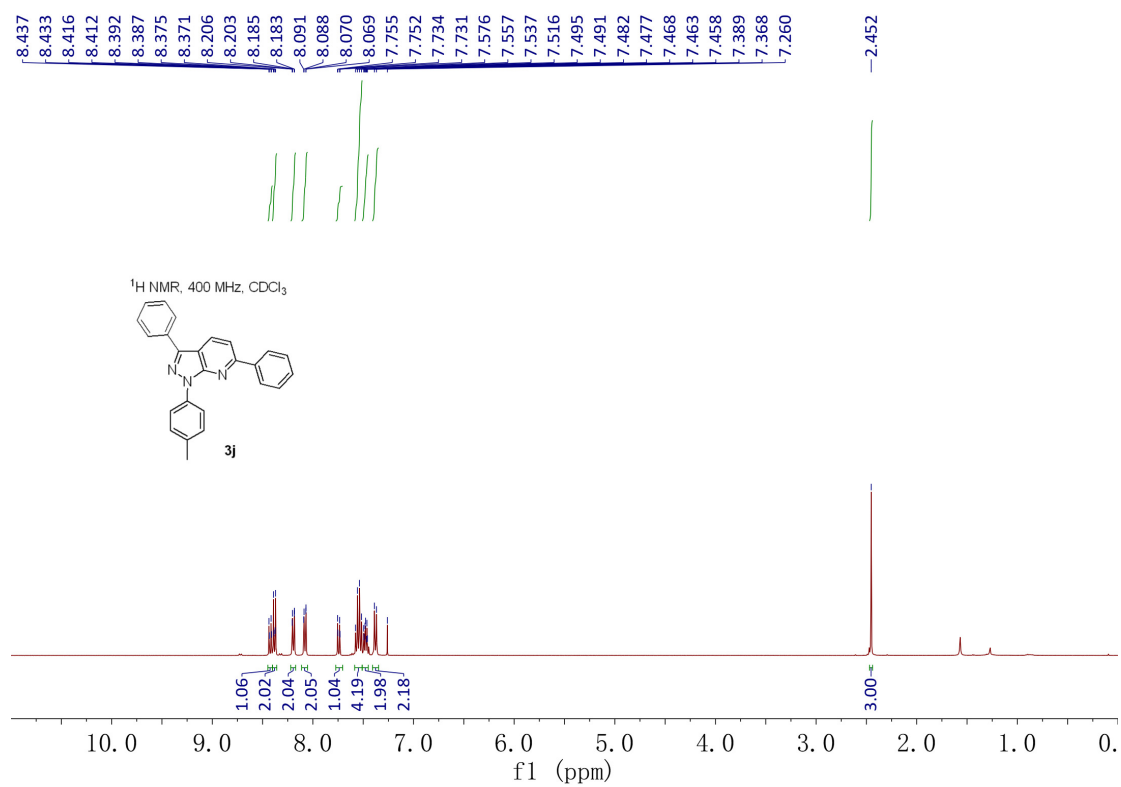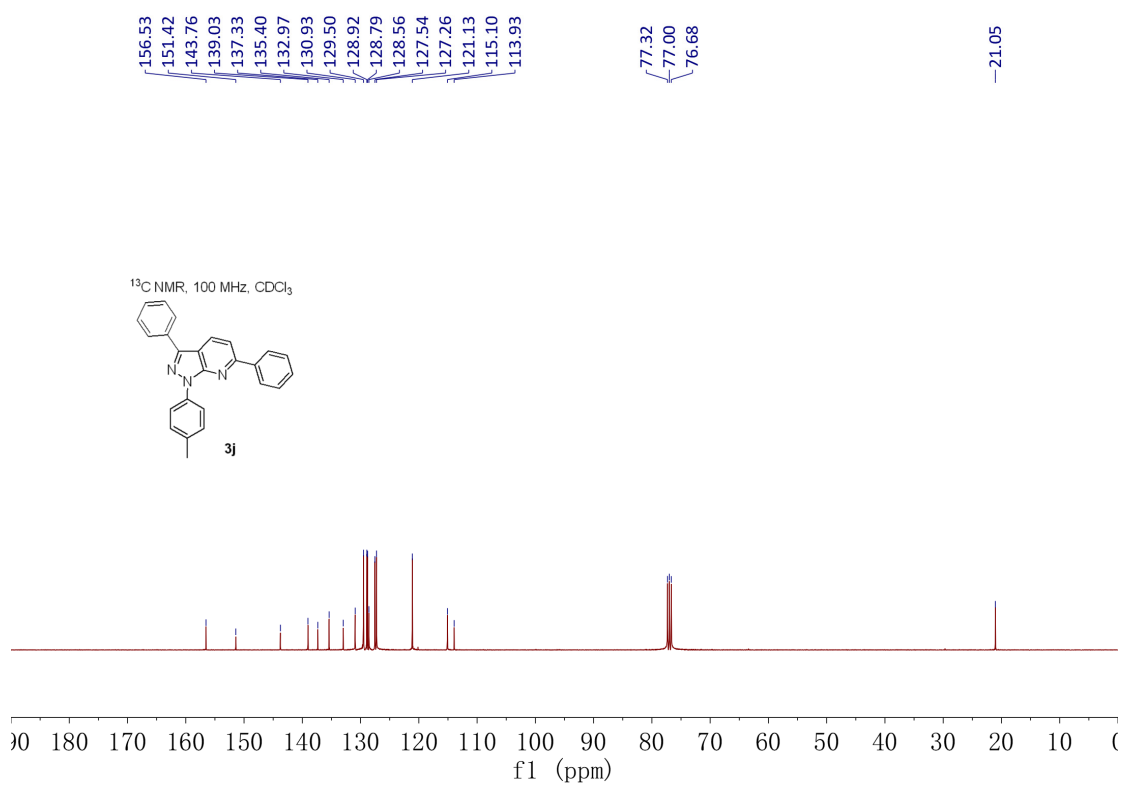

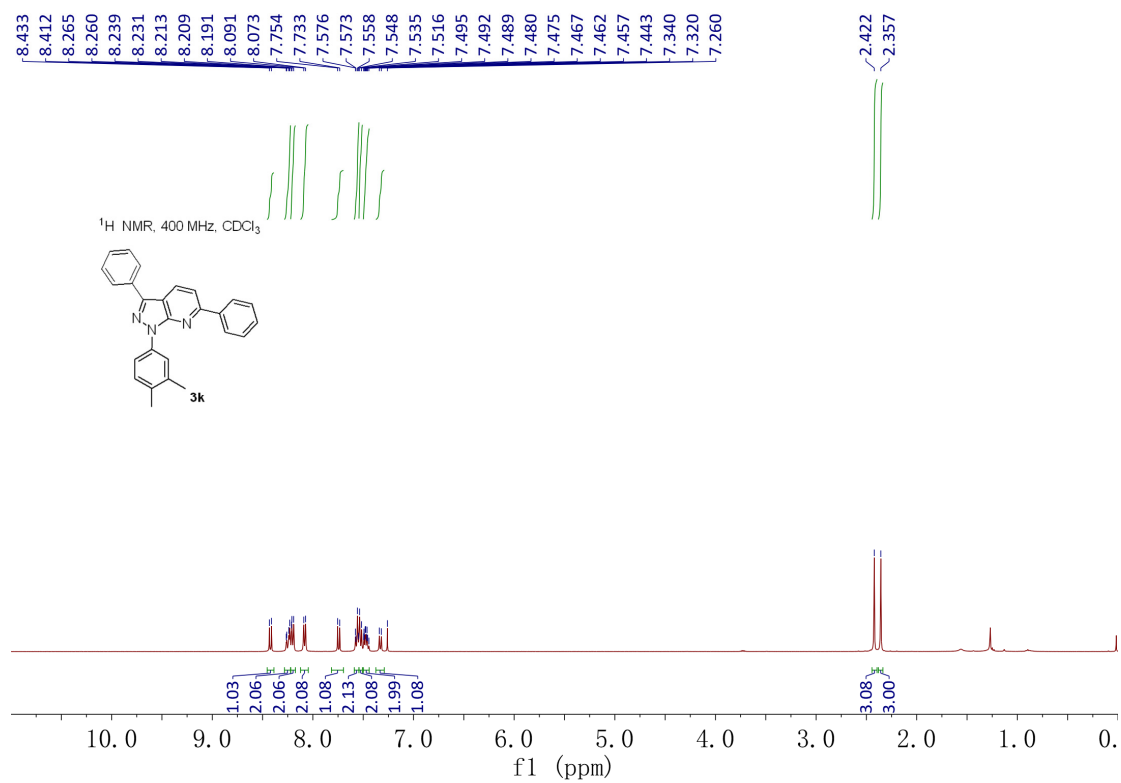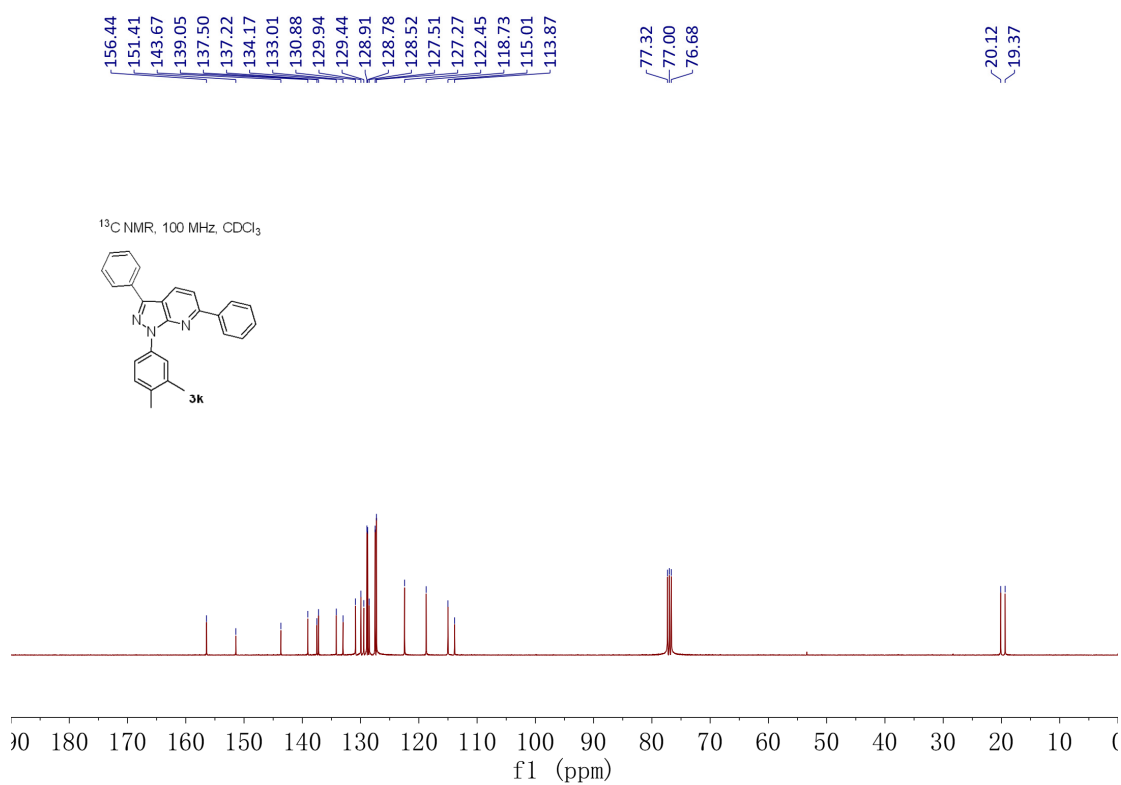

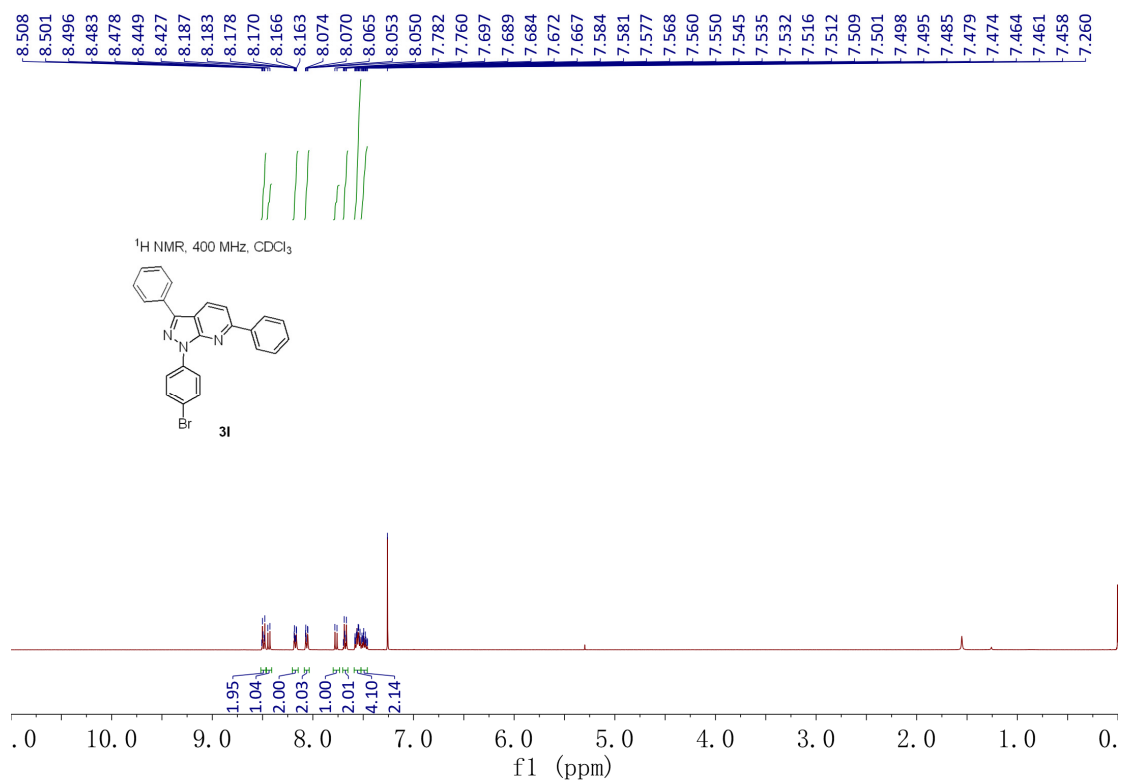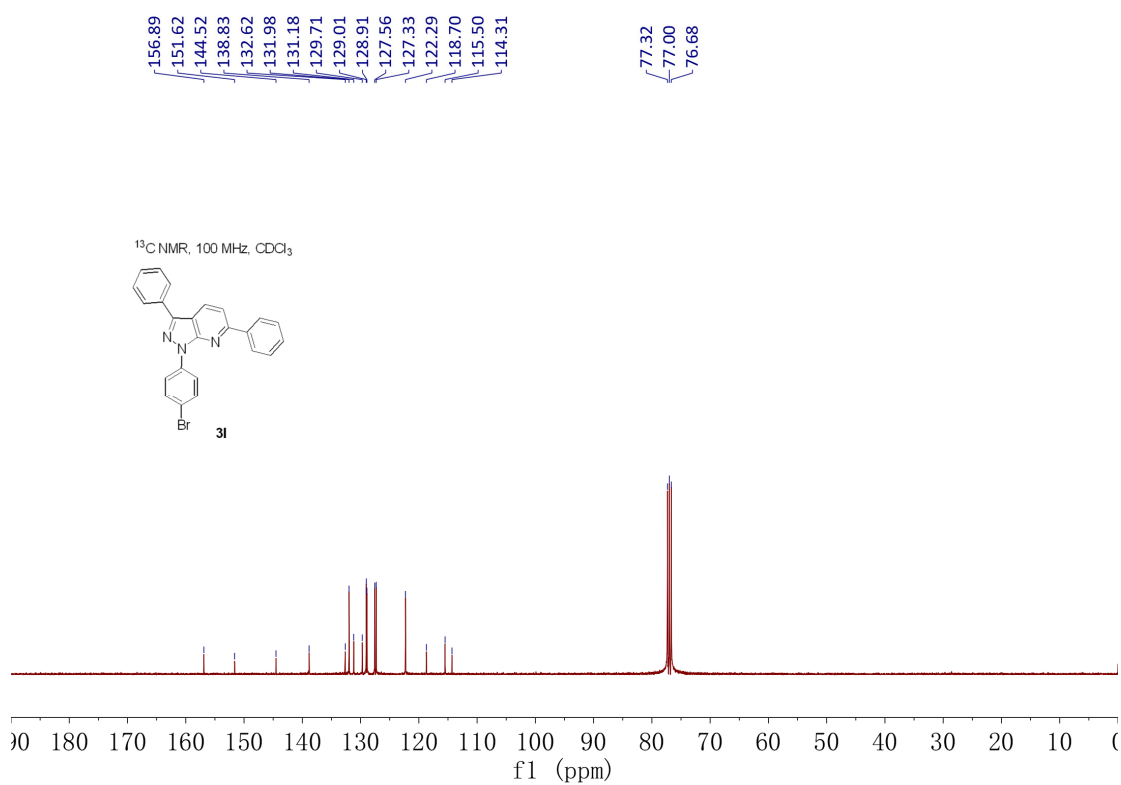

8.526  
8.524  
8.505  
8.502  
8.356  
8.335  
8.193  
8.189  
8.172  
8.170  
8.052  
8.047  
8.039  
8.030  
8.022  
8.017  
7.742  
7.720  
7.720  
7.594  
7.590  
7.576  
7.574  
7.559  
7.554  
7.542  
7.523  
7.508  
7.505  
7.501  
7.493  
7.487  
7.479  
7.472  
7.358  
7.339  
7.321  
7.260  
7.239  
7.223  
7.217  
7.210

<sup>1</sup>H NMR, 400 MHz, CDCl<sub>3</sub>

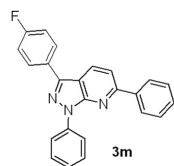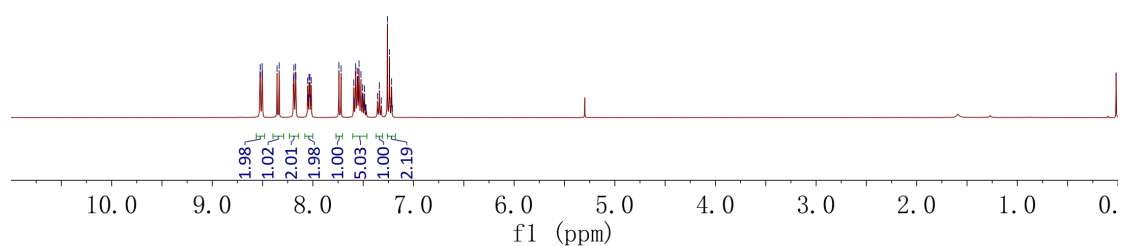

164.30  
161.83  
156.73  
151.51  
143.12  
139.68  
138.87  
130.73  
129.61  
129.00  
128.98  
128.92  
128.84  
125.72  
121.02  
116.08  
115.86  
115.29  
113.86  
77.32  
77.00  
76.68

<sup>13</sup>C NMR, 100 MHz, CDCl<sub>3</sub>

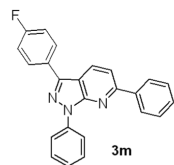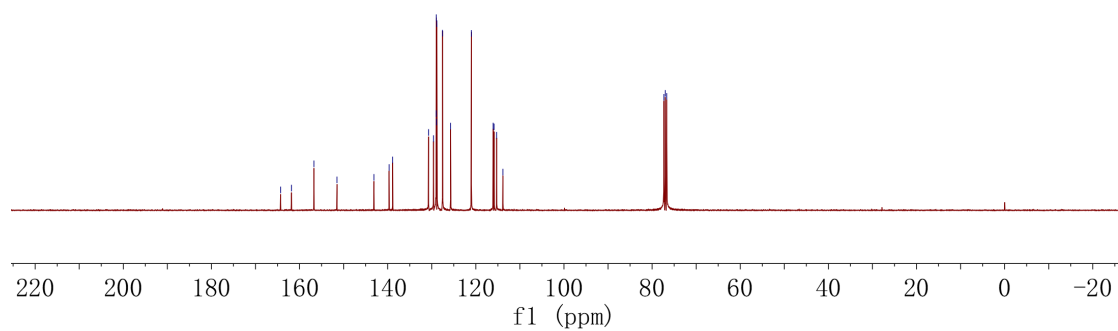

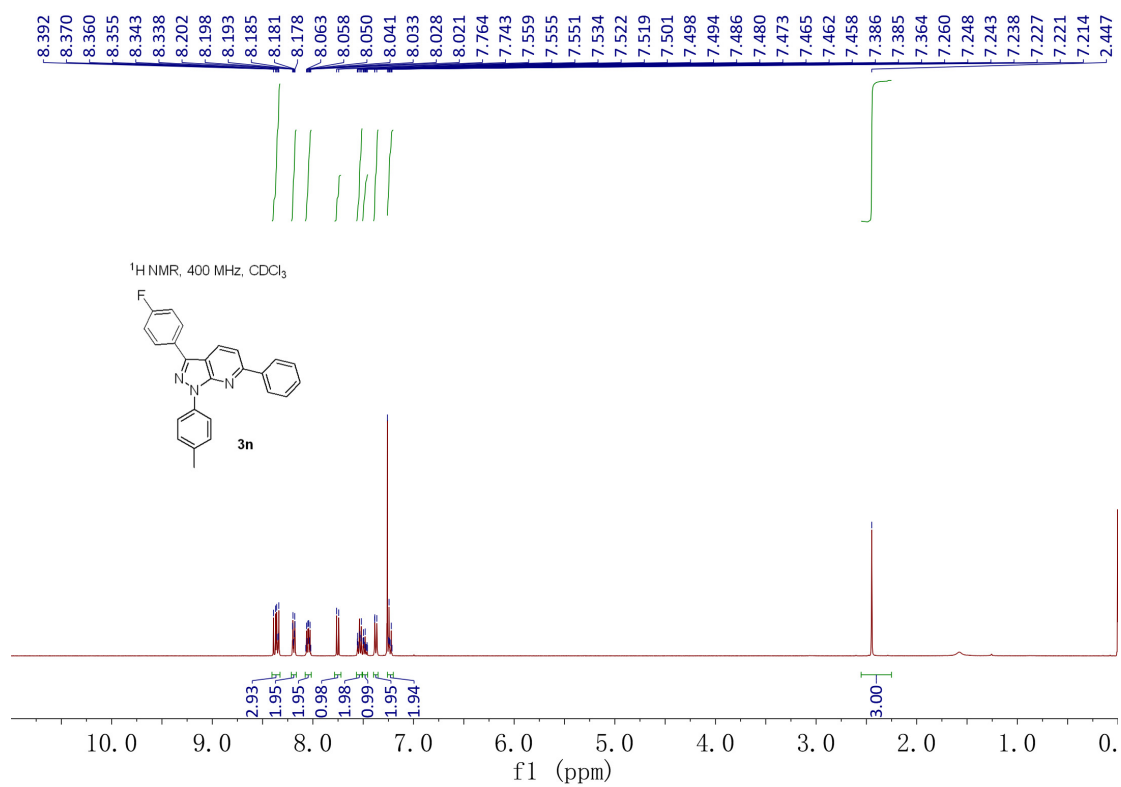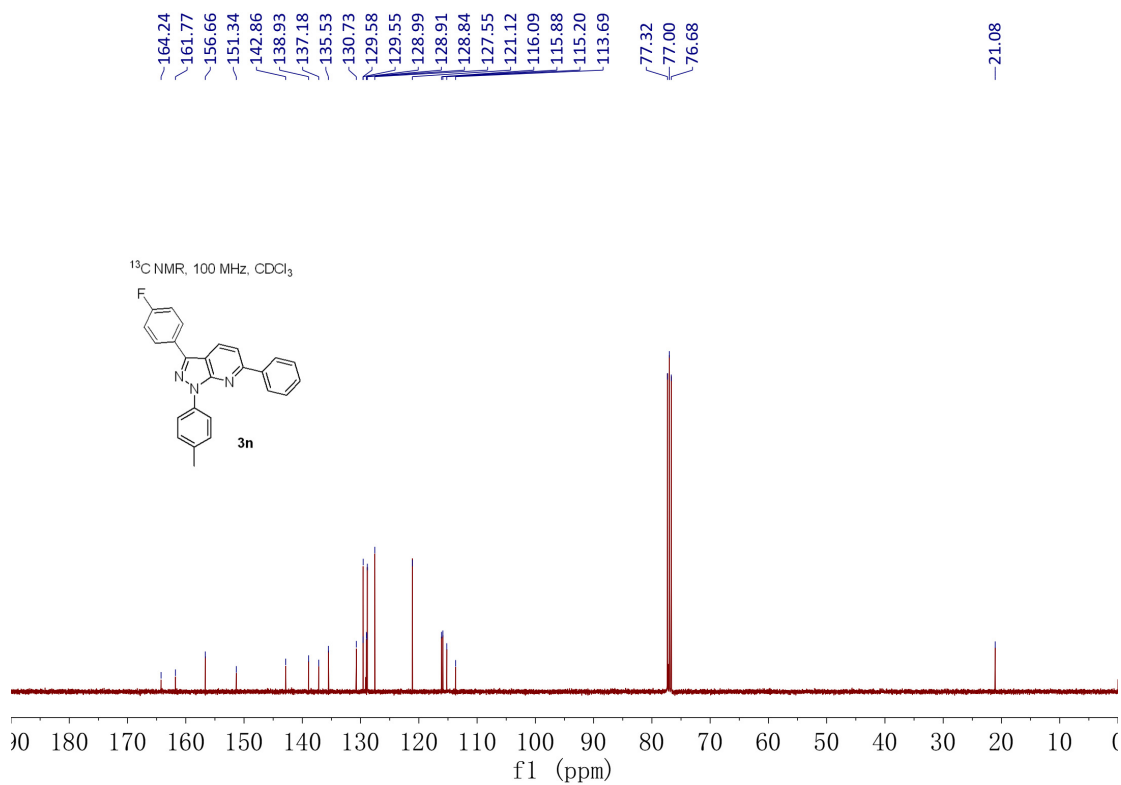

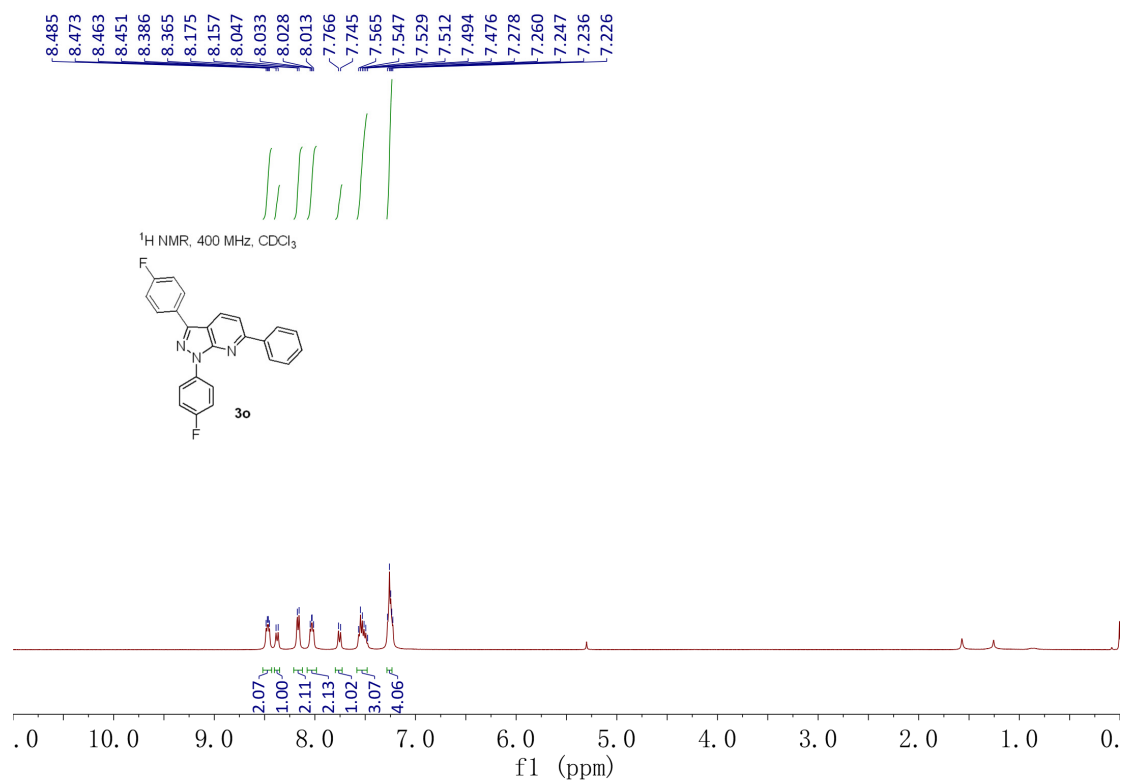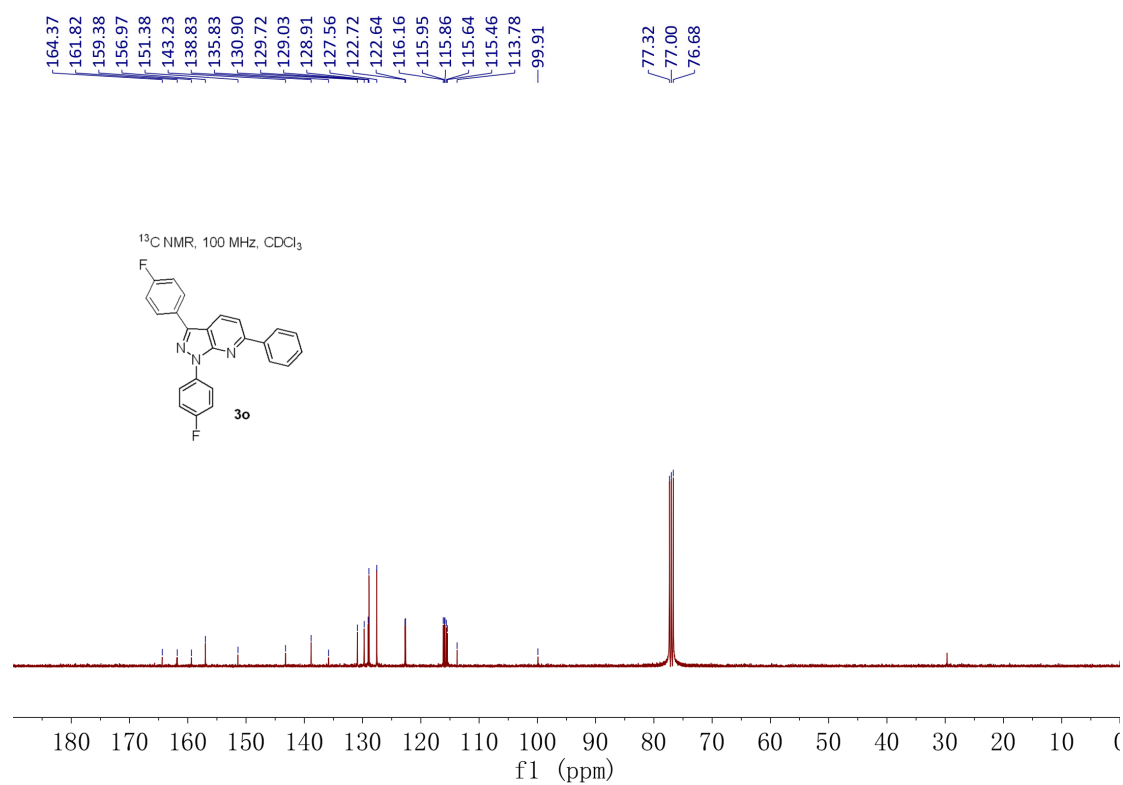

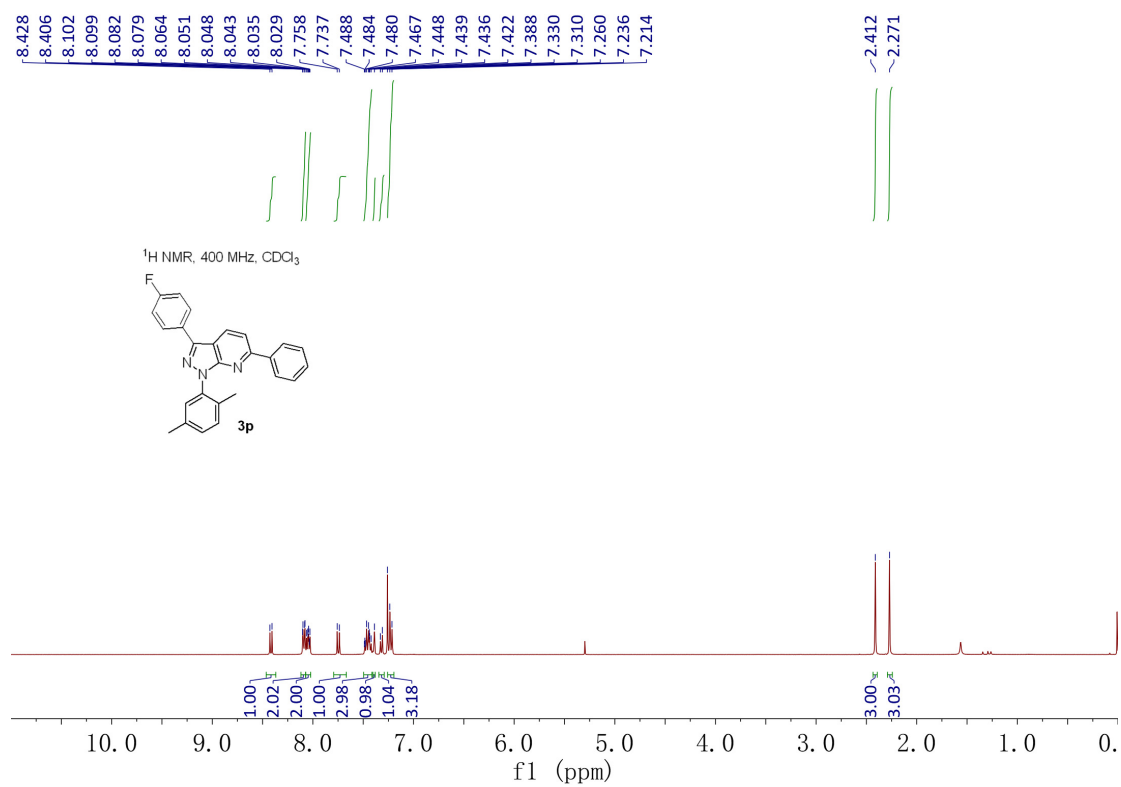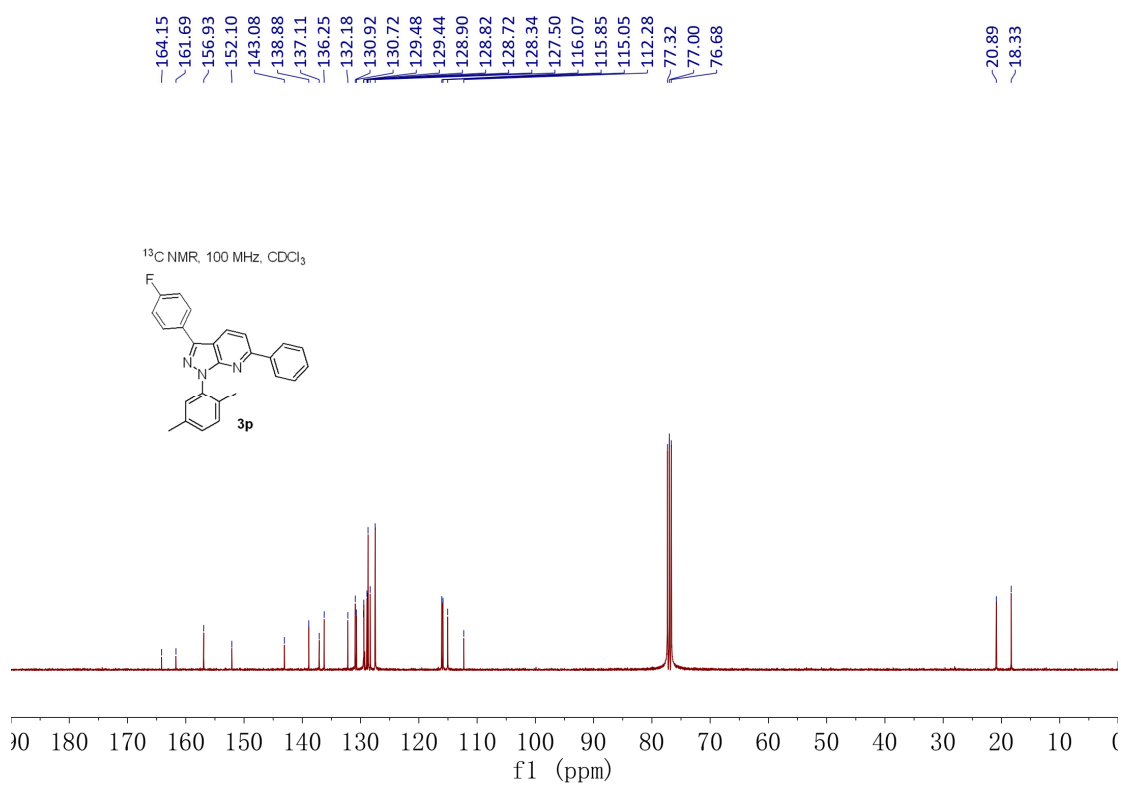

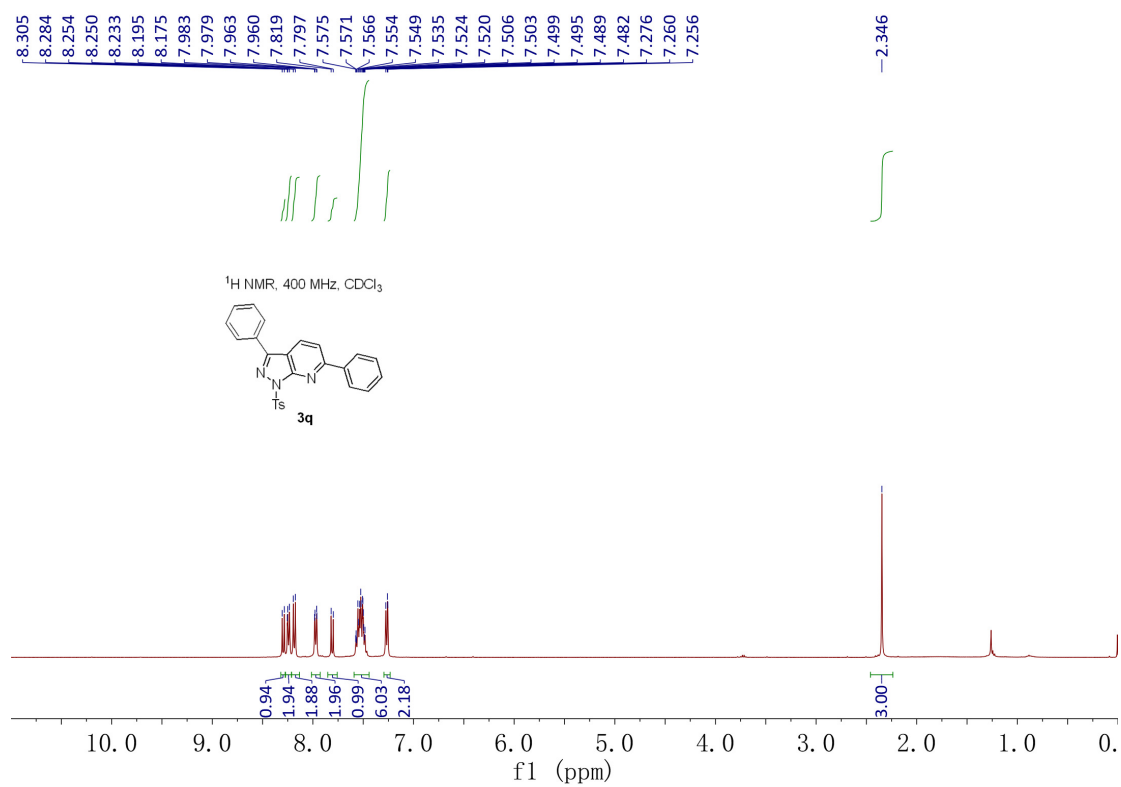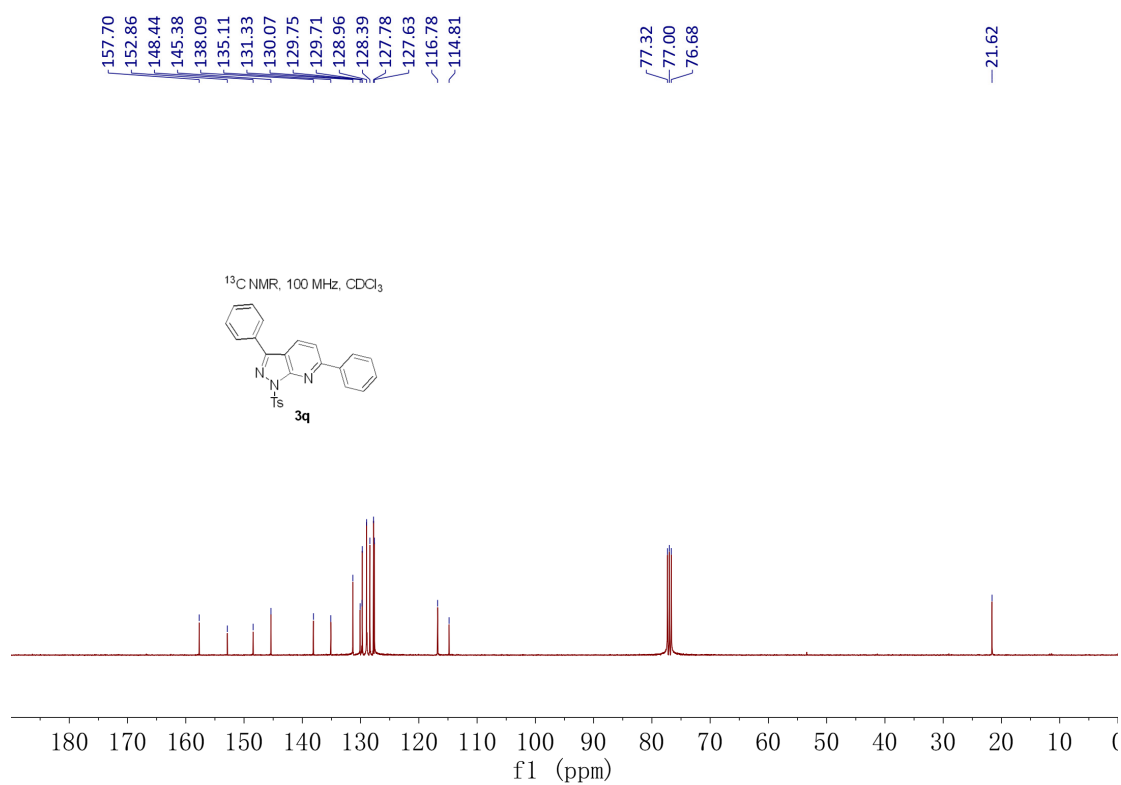

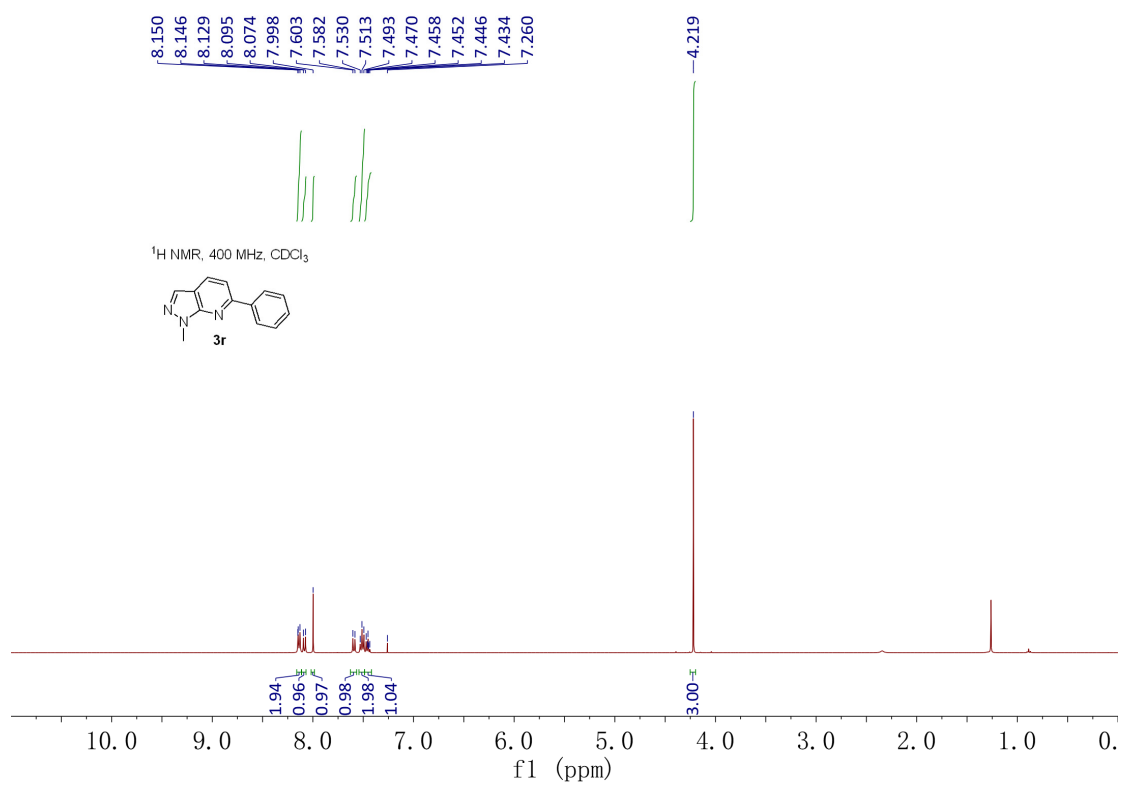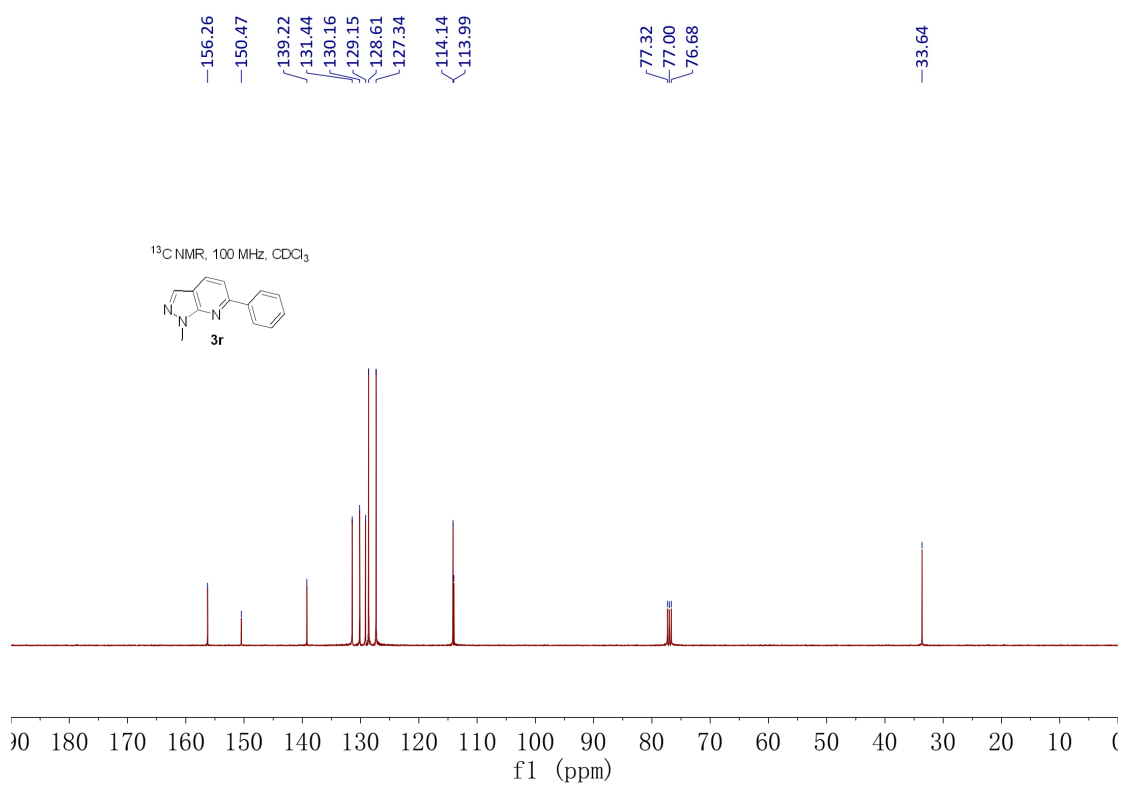

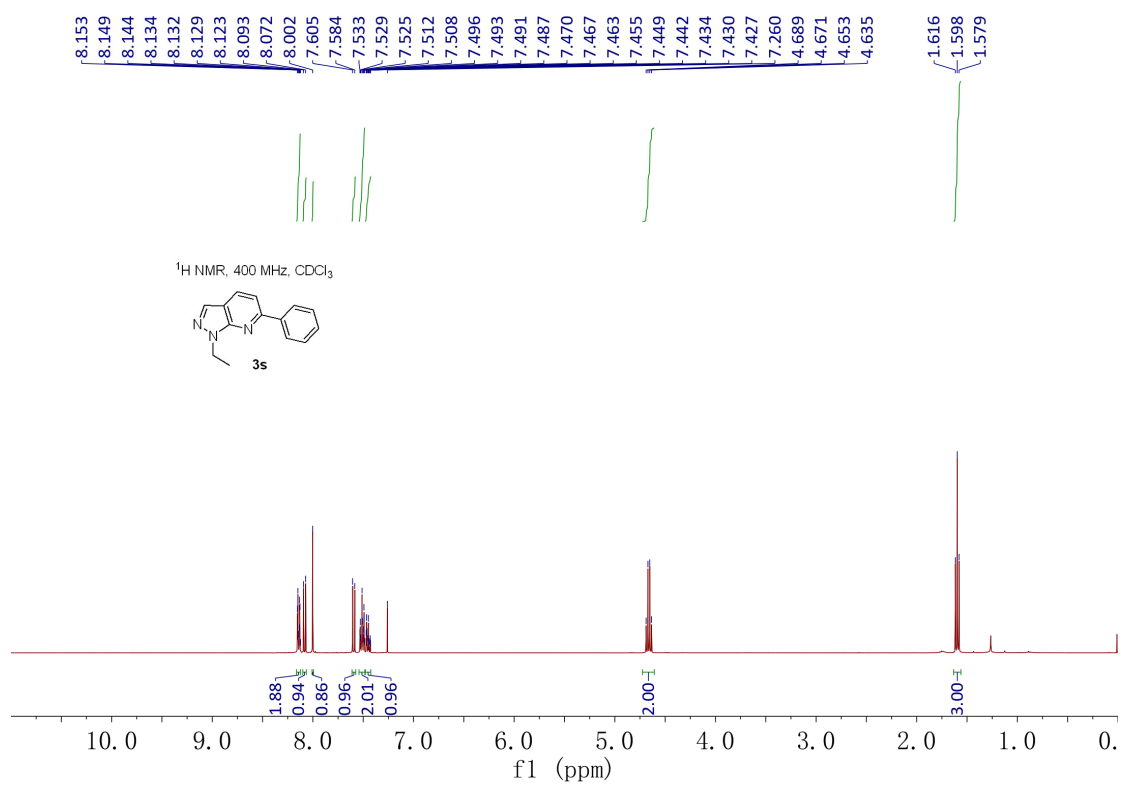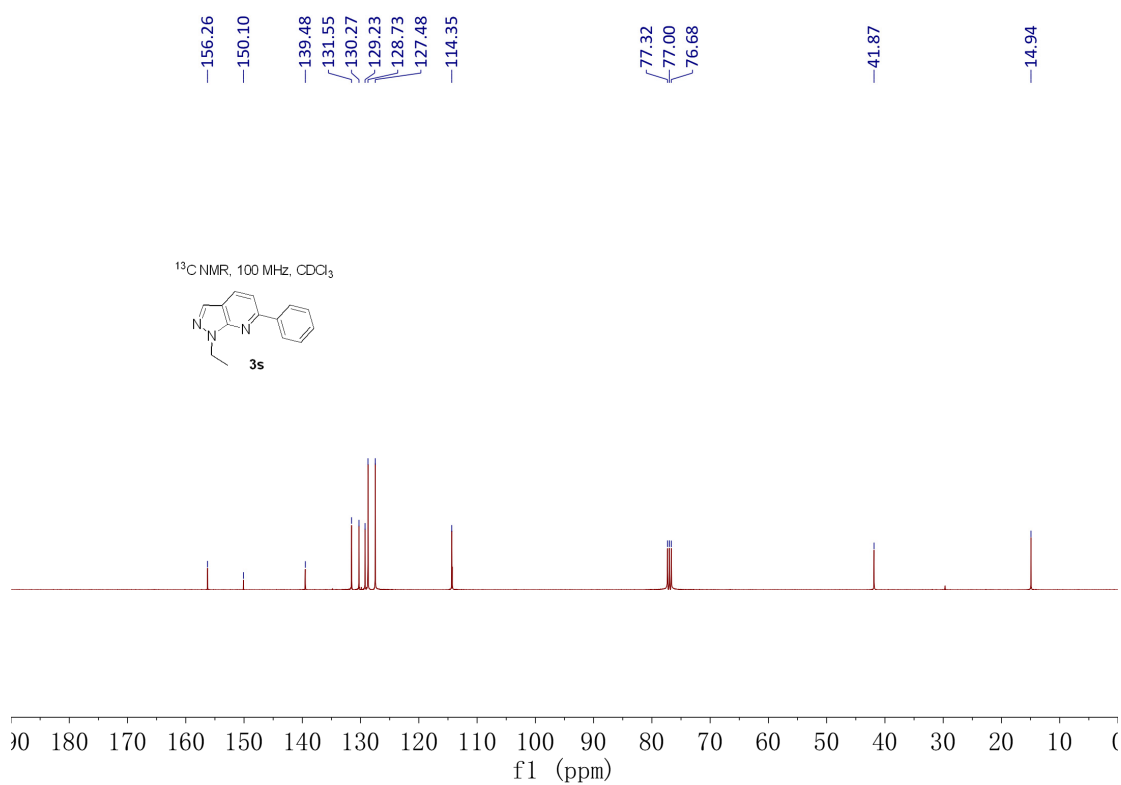

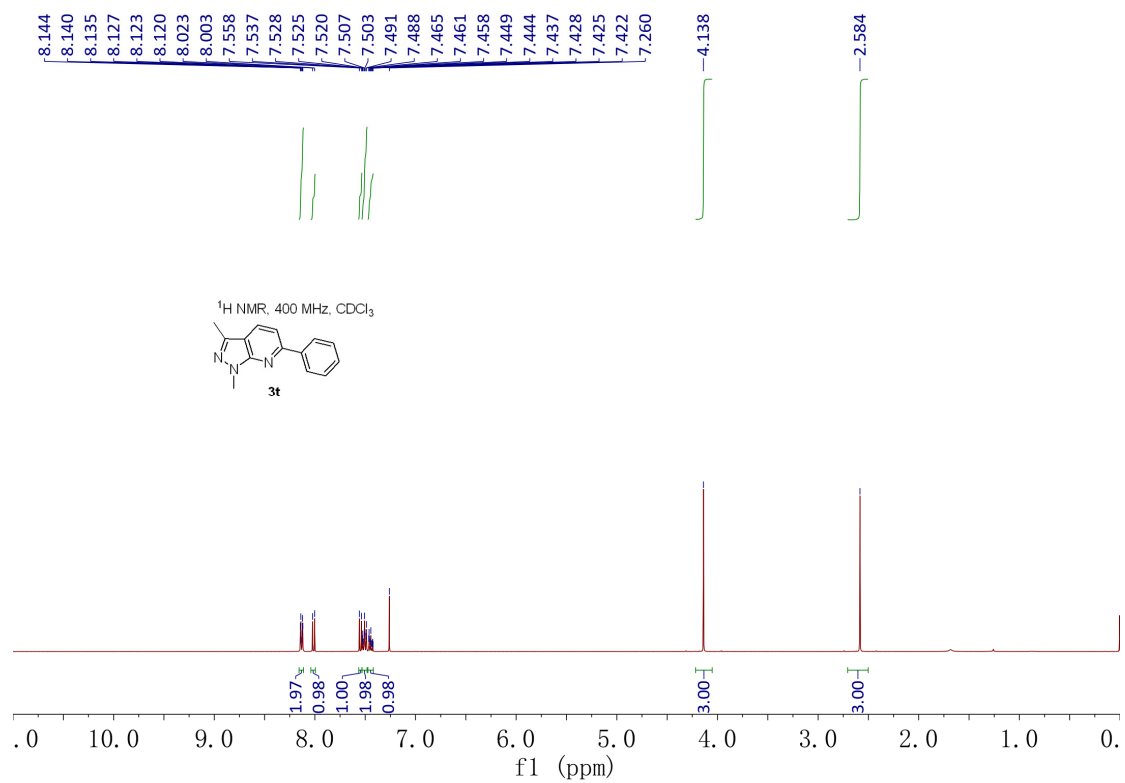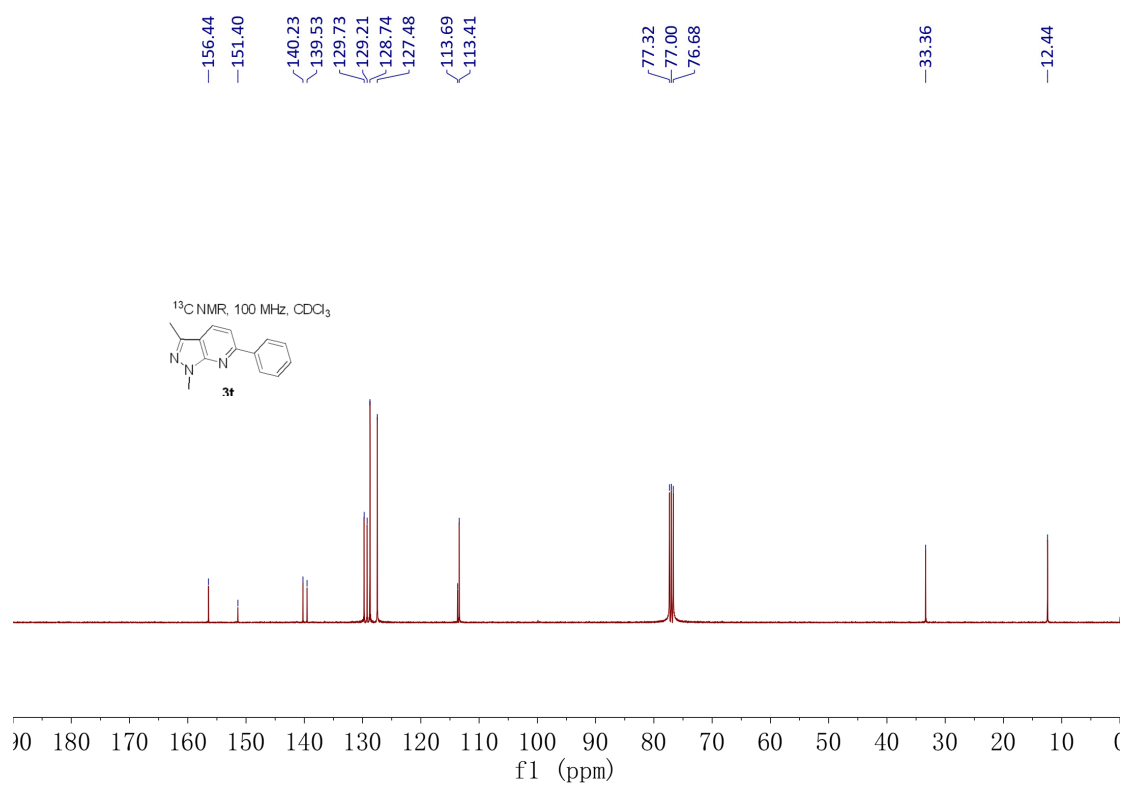

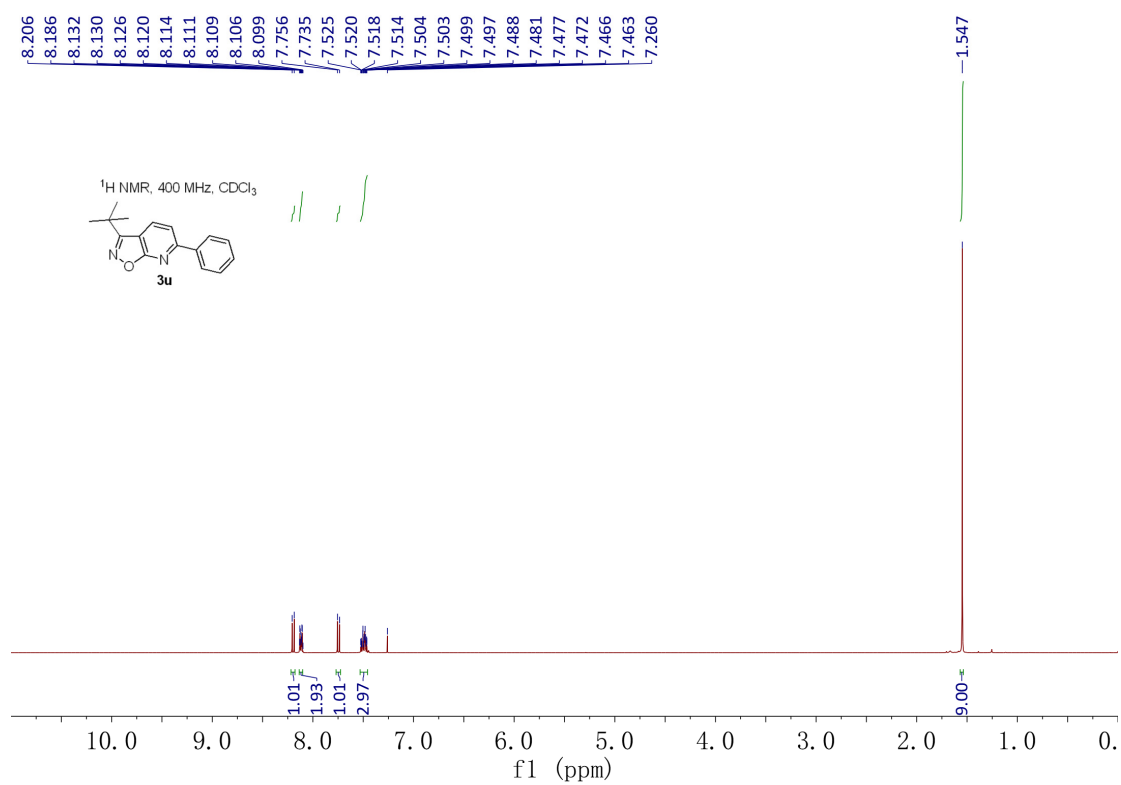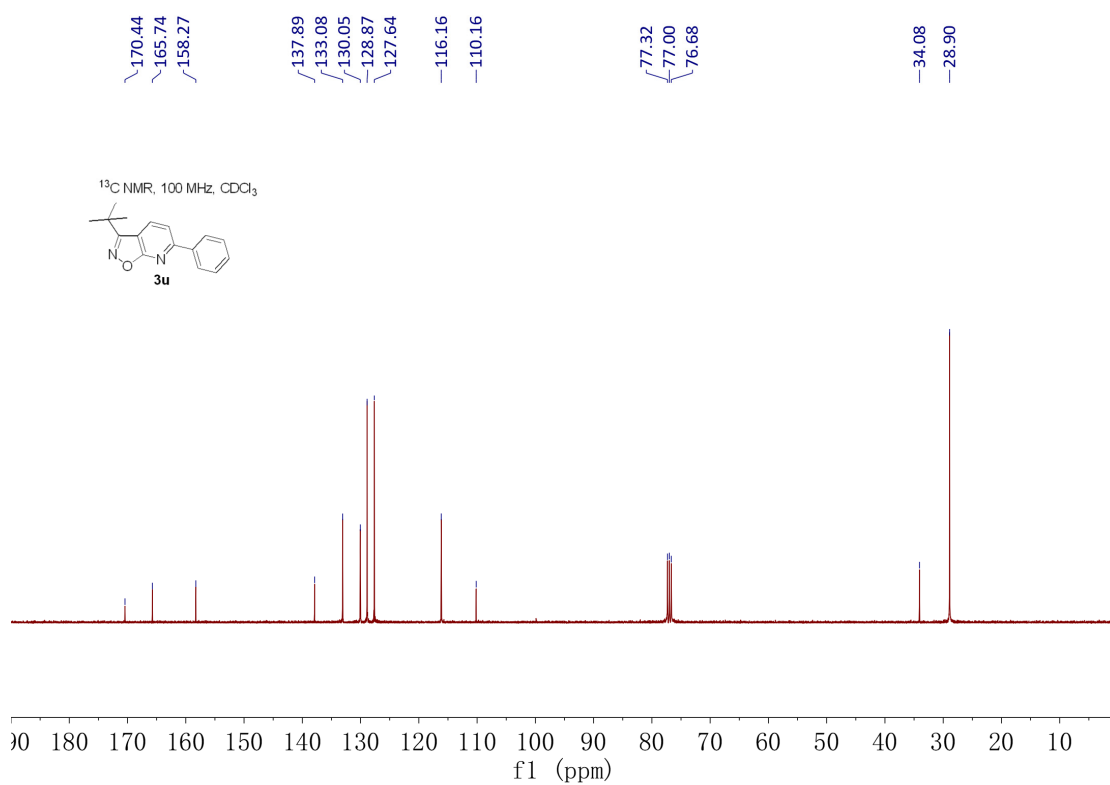

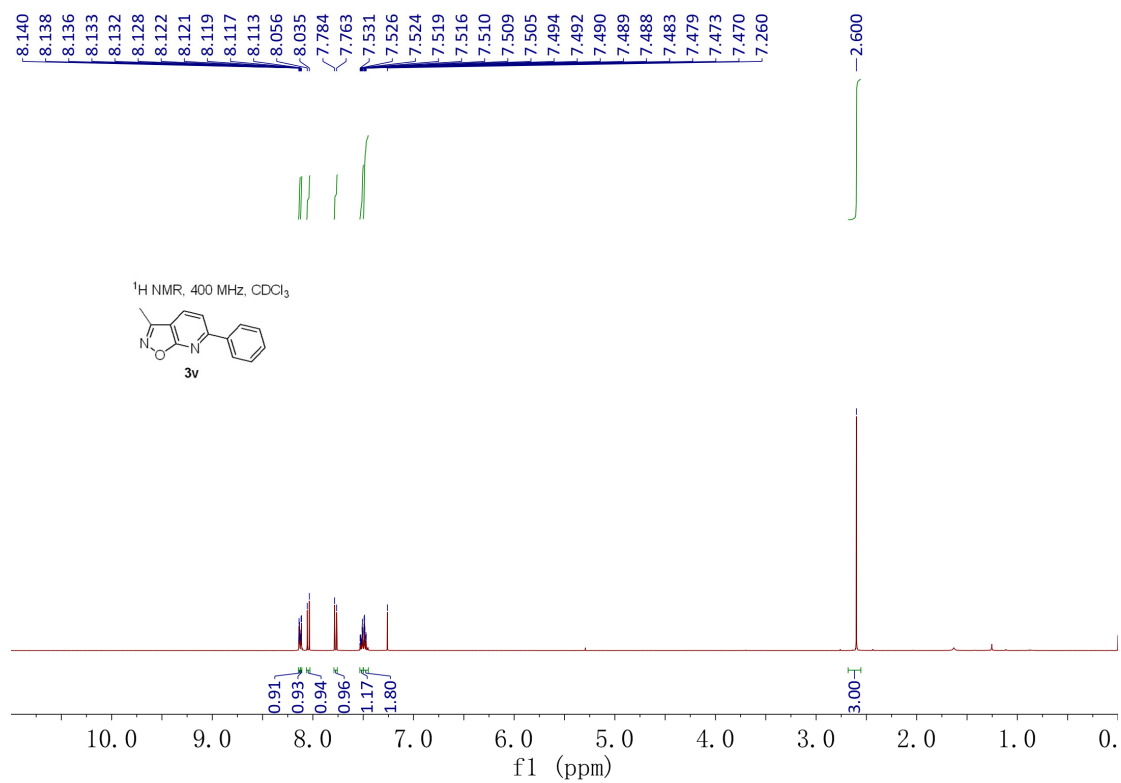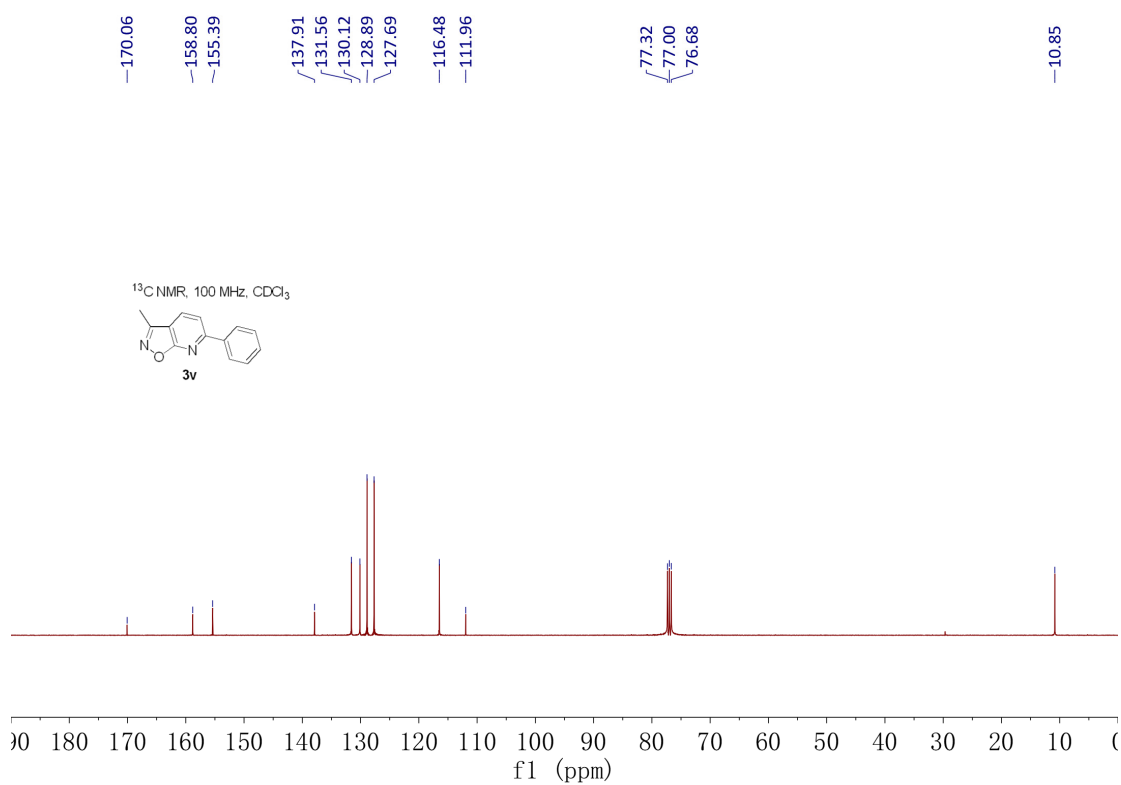

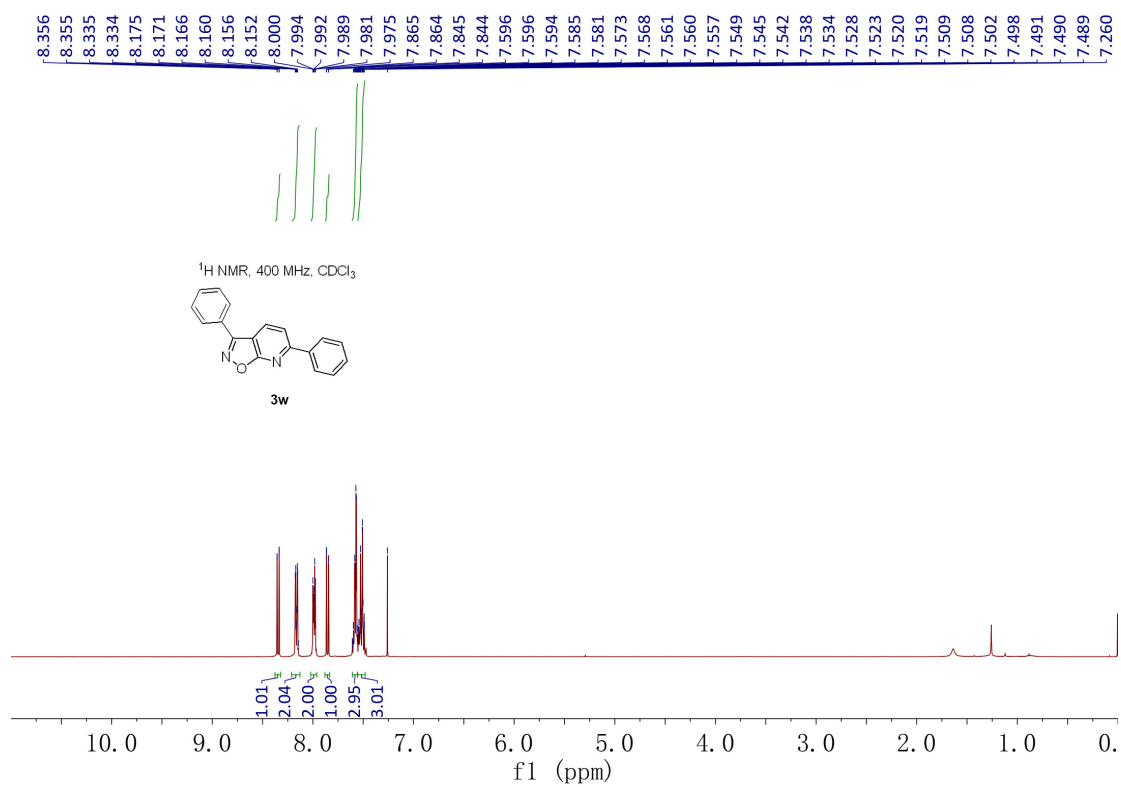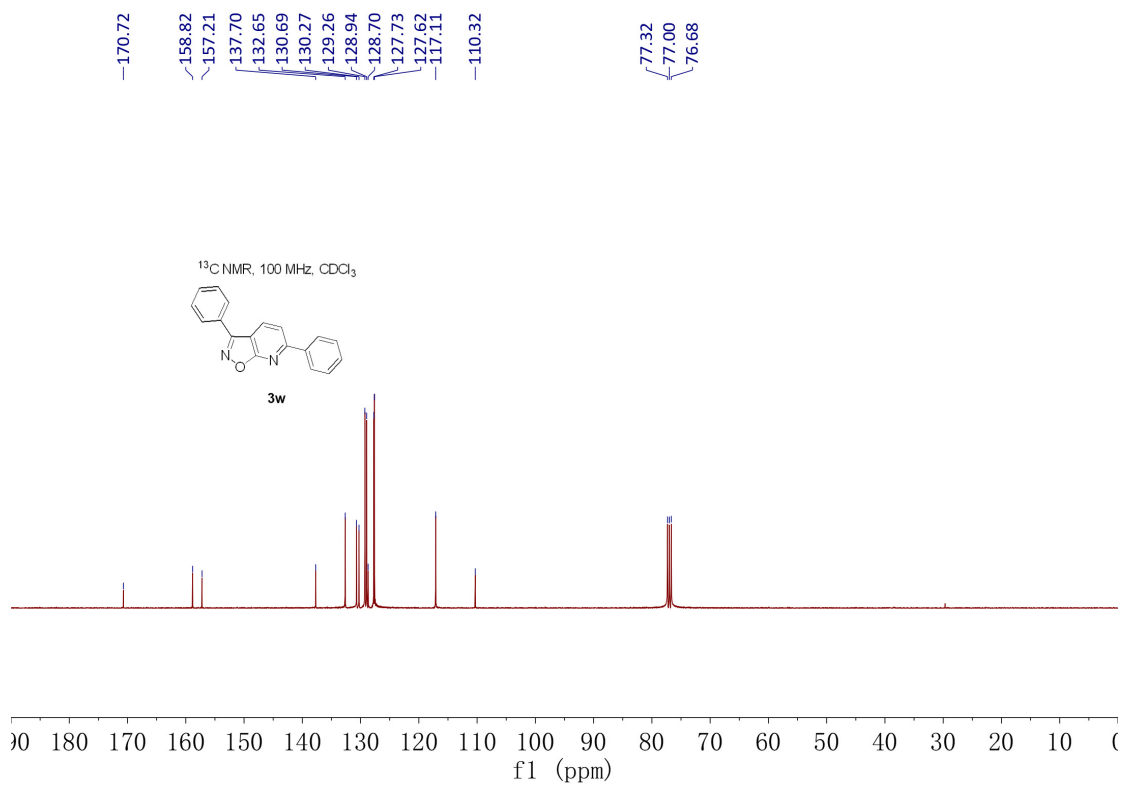

8.329  
8.308  
8.180  
8.178  
8.173  
8.168  
8.161  
8.157  
8.153  
8.016  
8.009  
8.004  
7.996  
7.992  
7.991  
7.987  
7.979  
7.974  
7.966  
7.881  
7.860  
7.556  
7.552  
7.548  
7.541  
7.535  
7.534  
7.530  
7.525  
7.520  
7.514  
7.510  
7.500  
7.308  
7.301  
7.295  
7.284  
7.279  
7.274  
7.262  
7.260  
7.257

<sup>1</sup>H NMR, 400 MHz, CDCl<sub>3</sub>

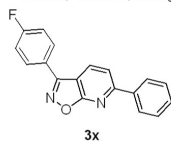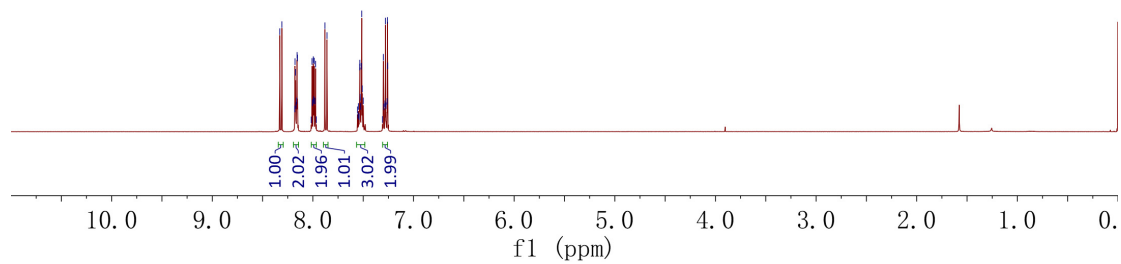

170.74  
165.47  
162.97  
158.99  
156.31  
137.64  
132.43  
130.37  
129.57  
128.99  
127.76  
124.92  
117.20  
116.65  
116.43  
110.12  
77.32  
77.00  
76.68

<sup>13</sup>C NMR, 100 MHz, CDCl<sub>3</sub>

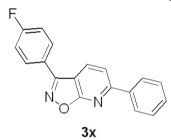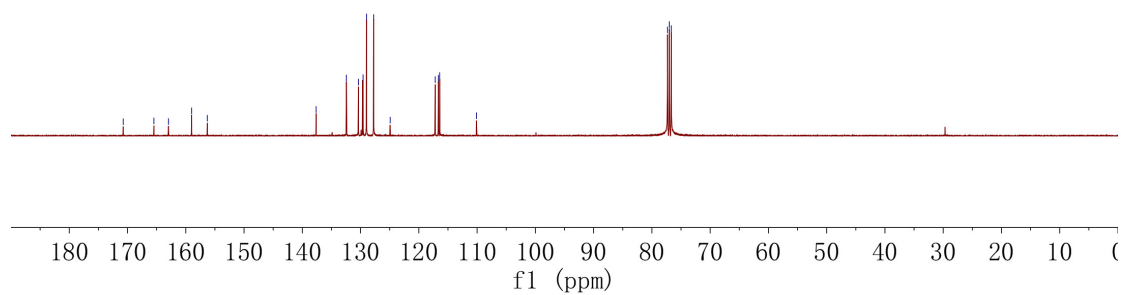

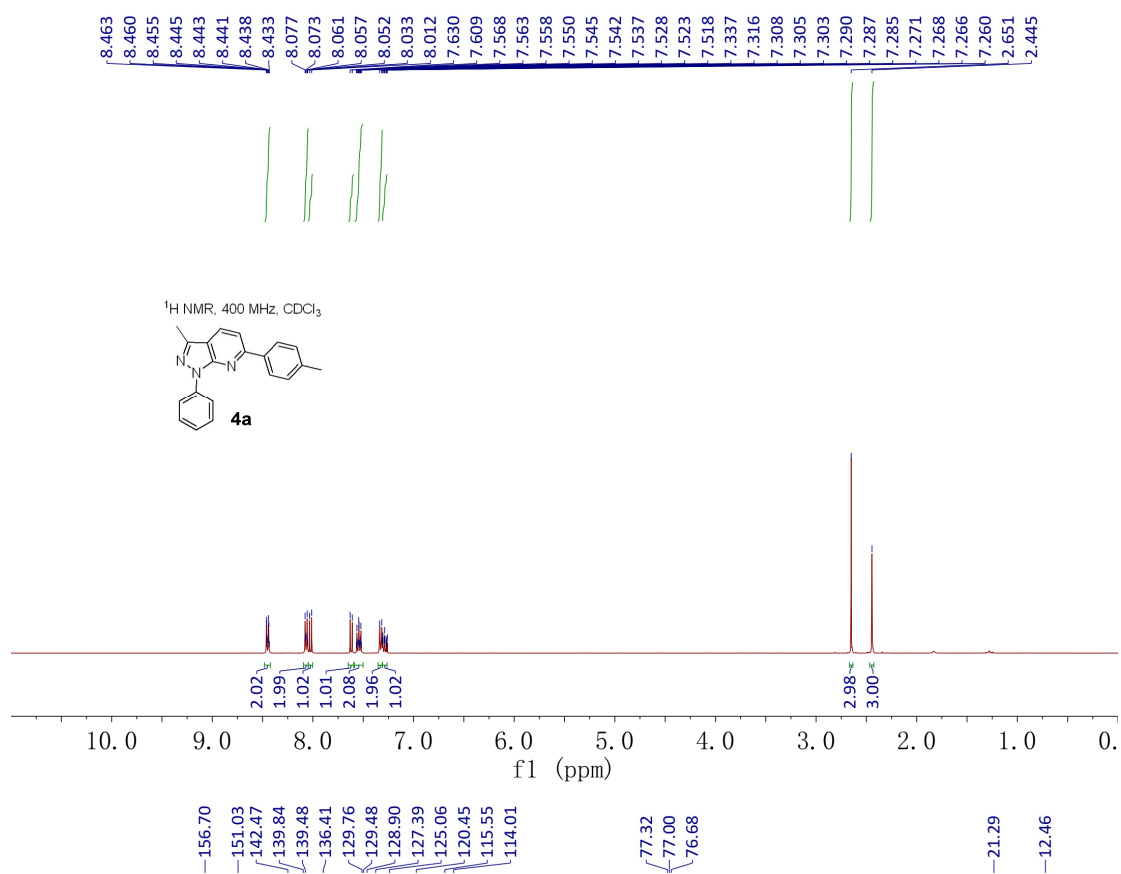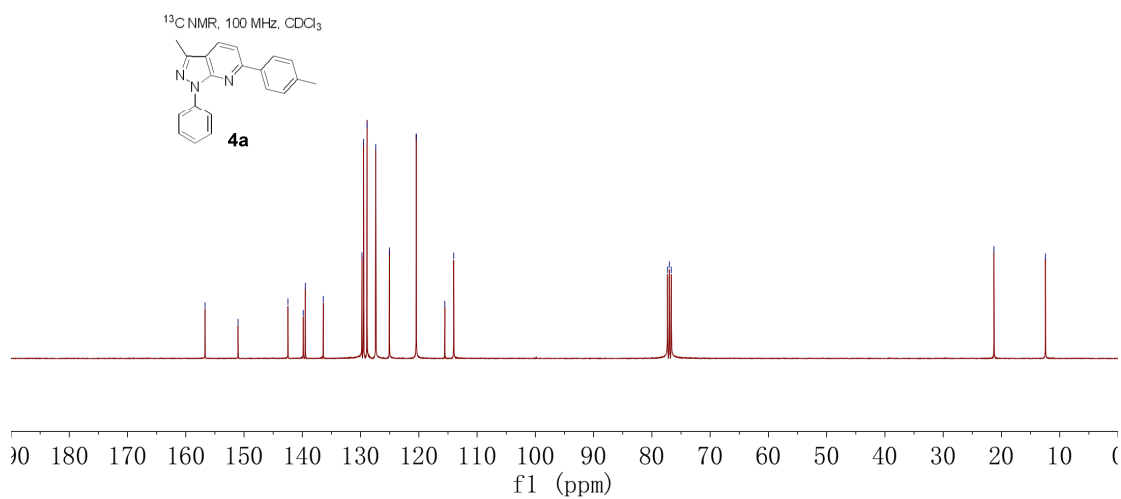

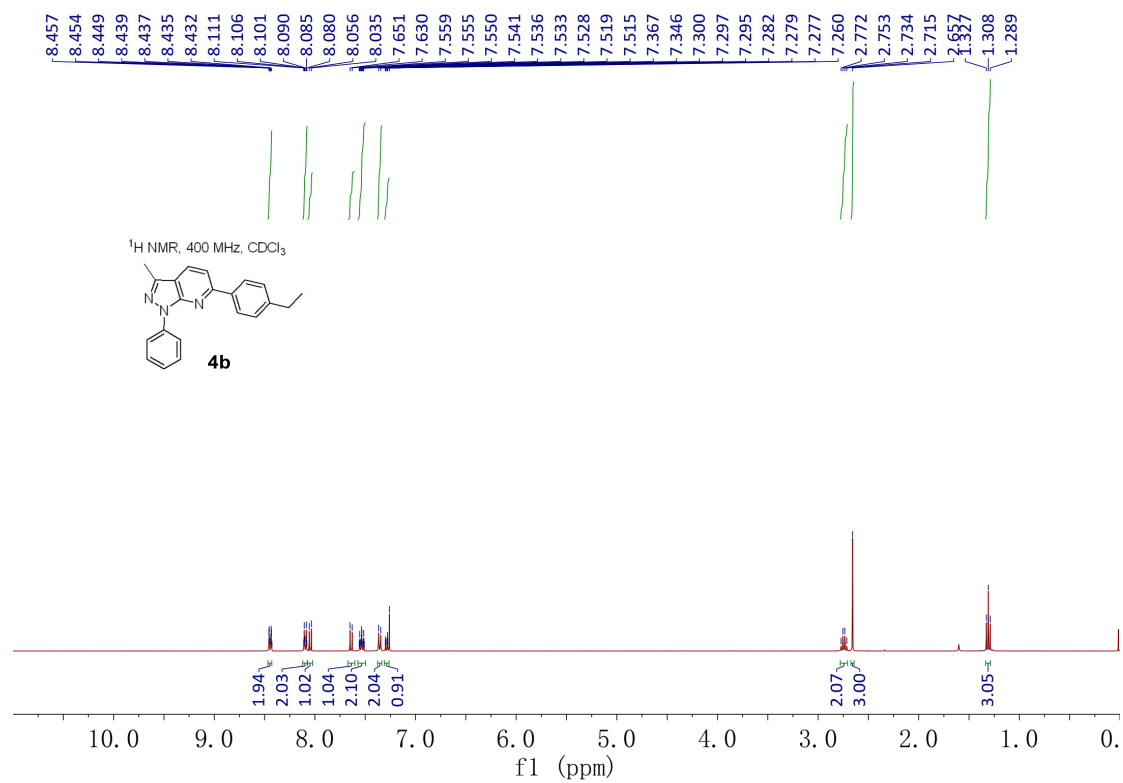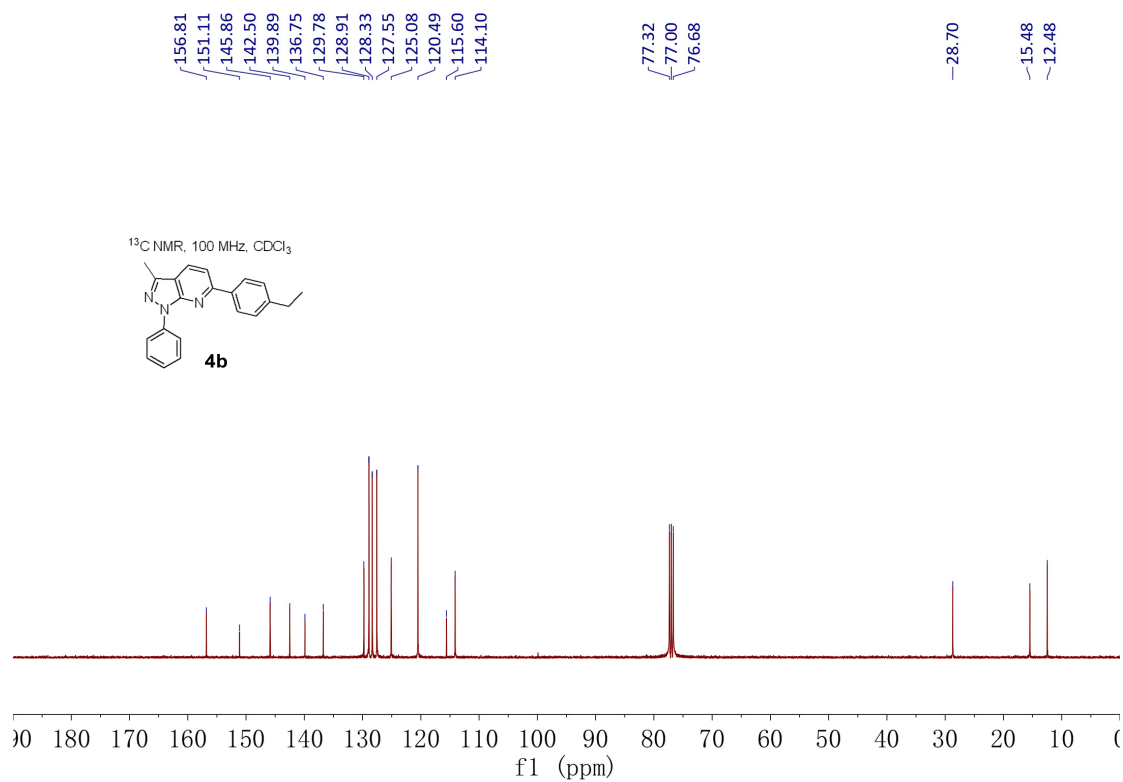

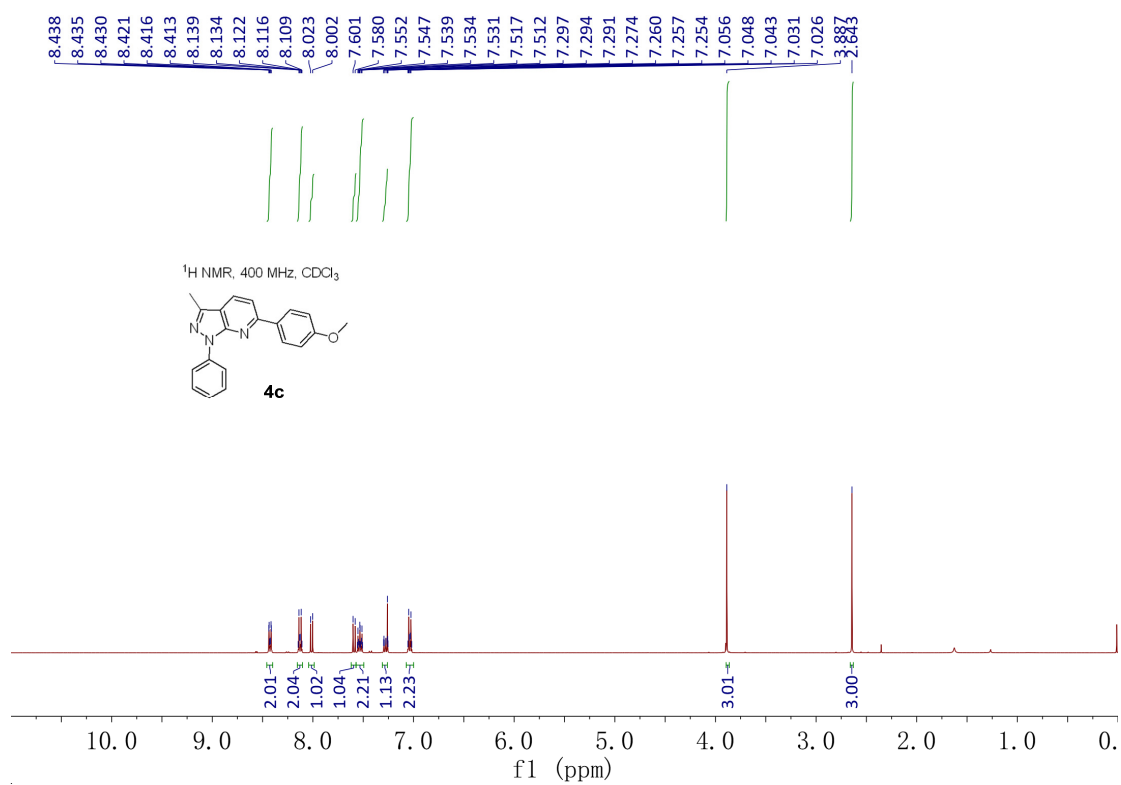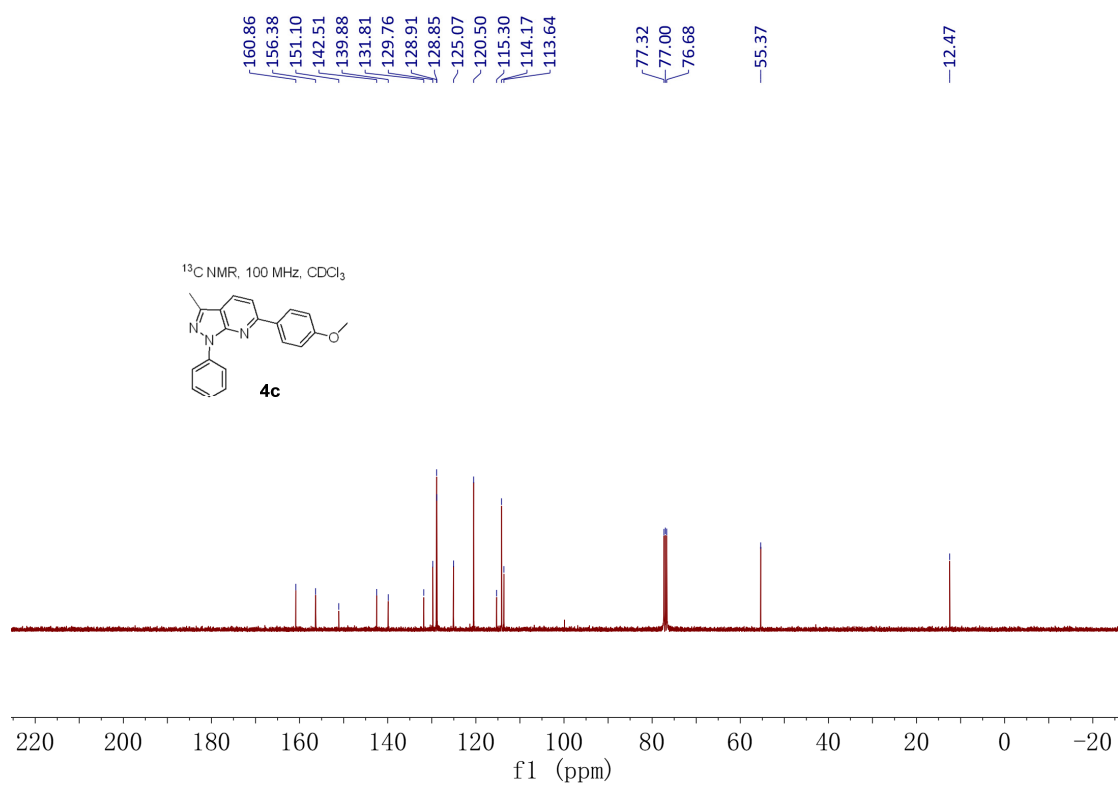

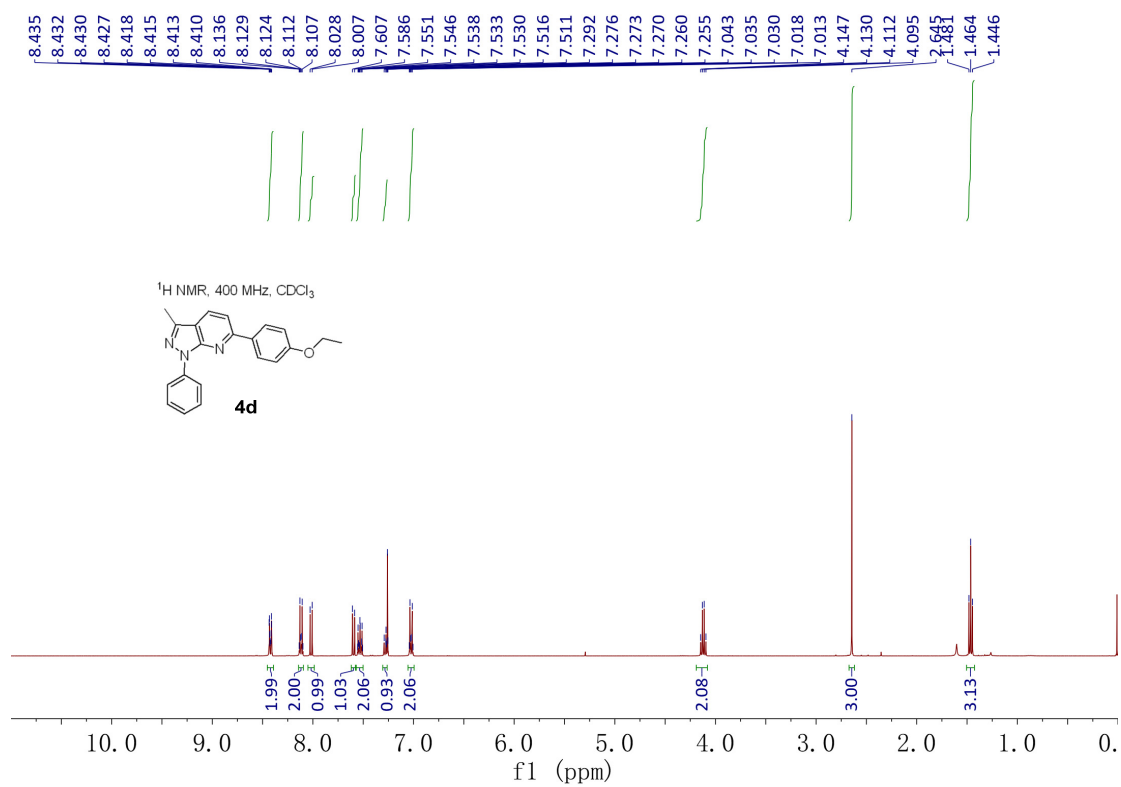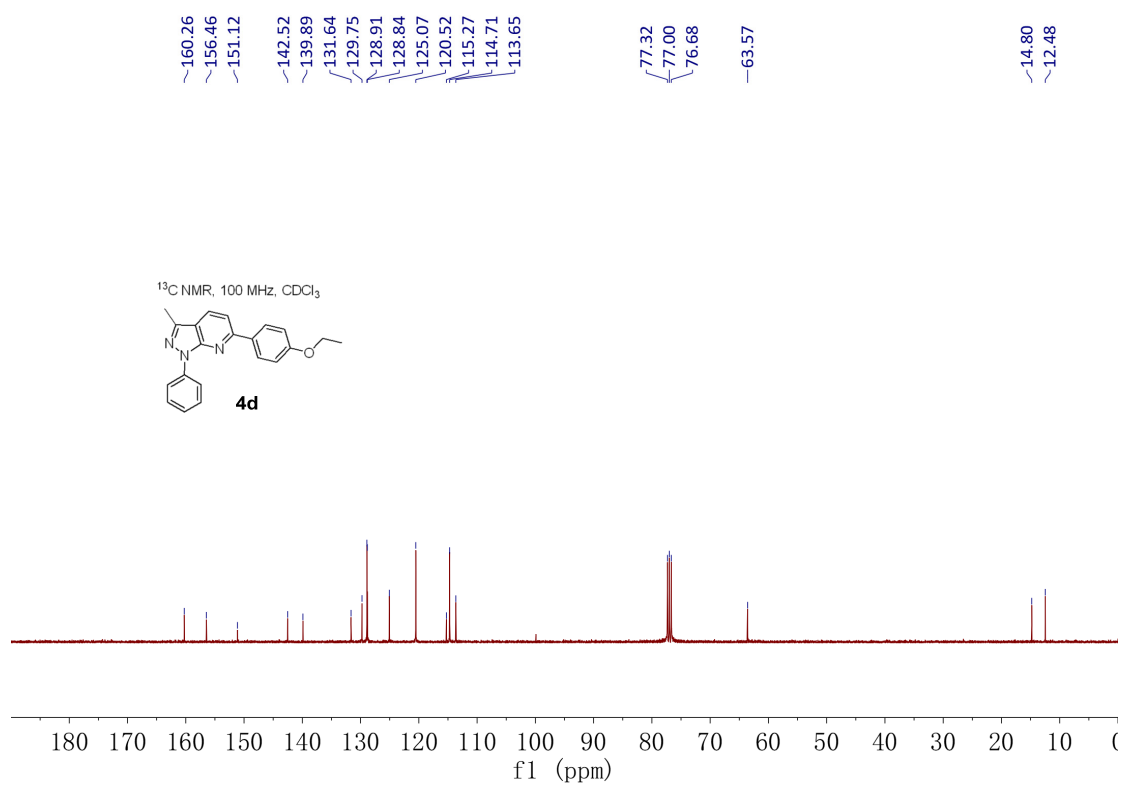

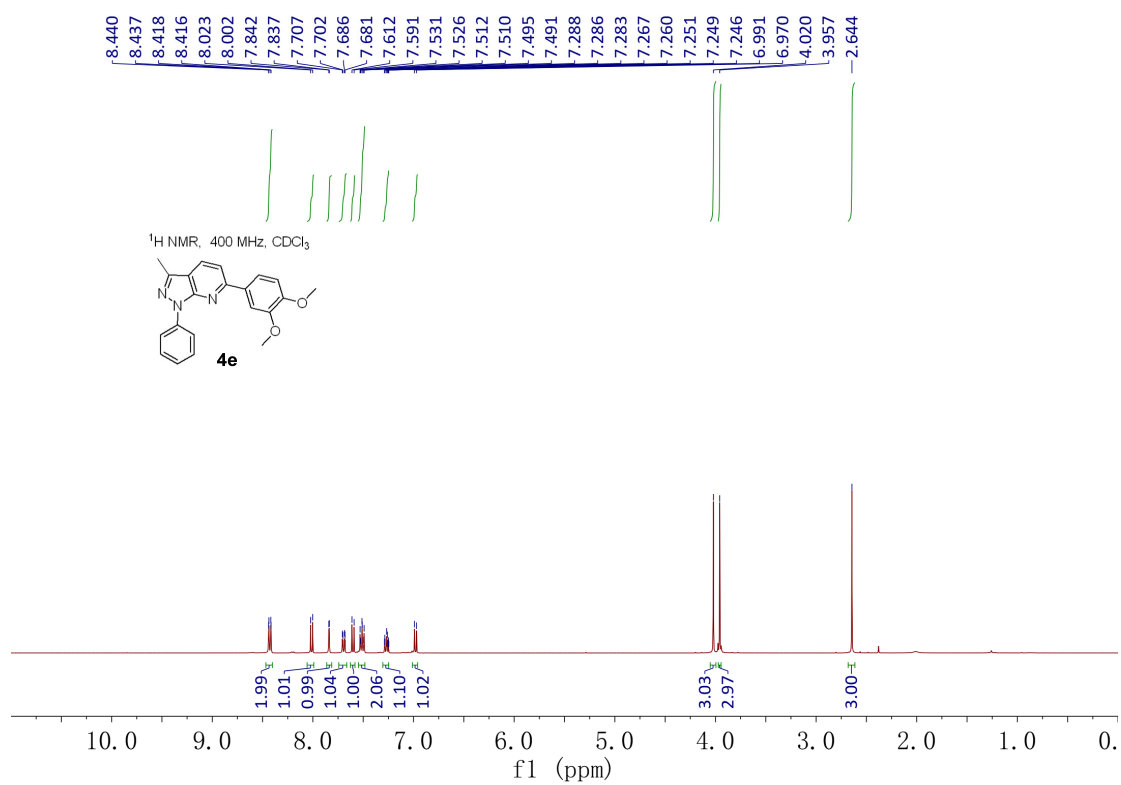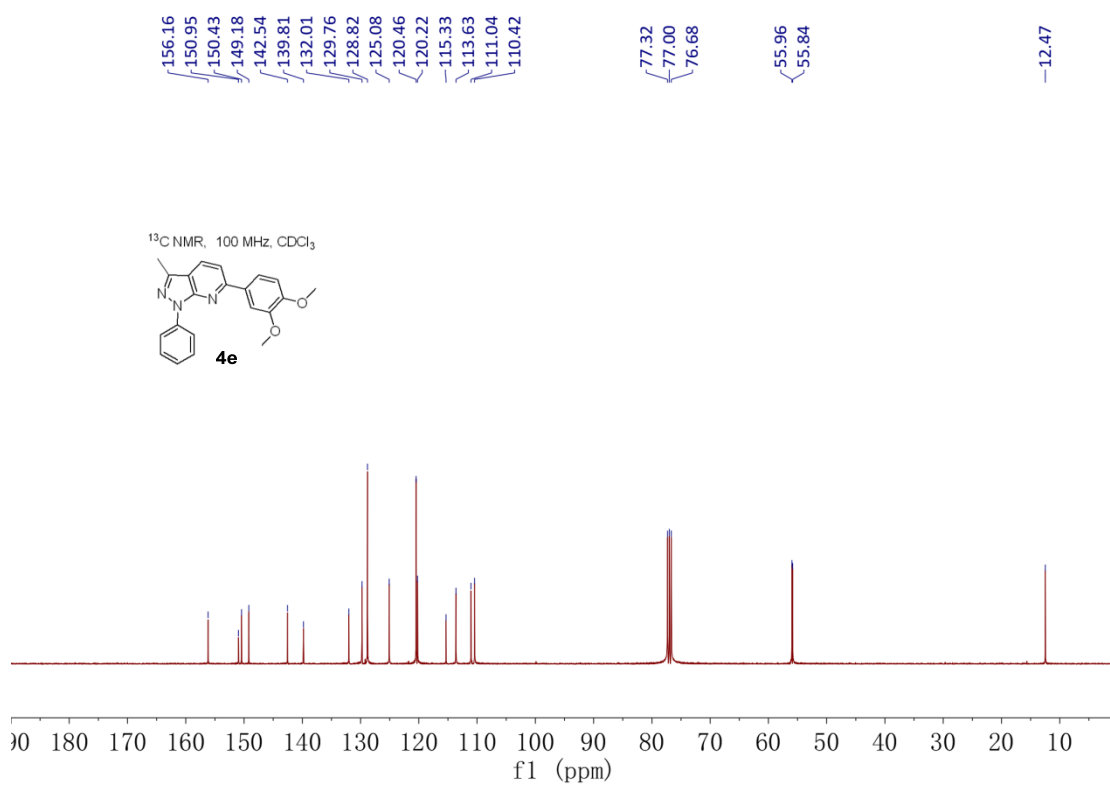

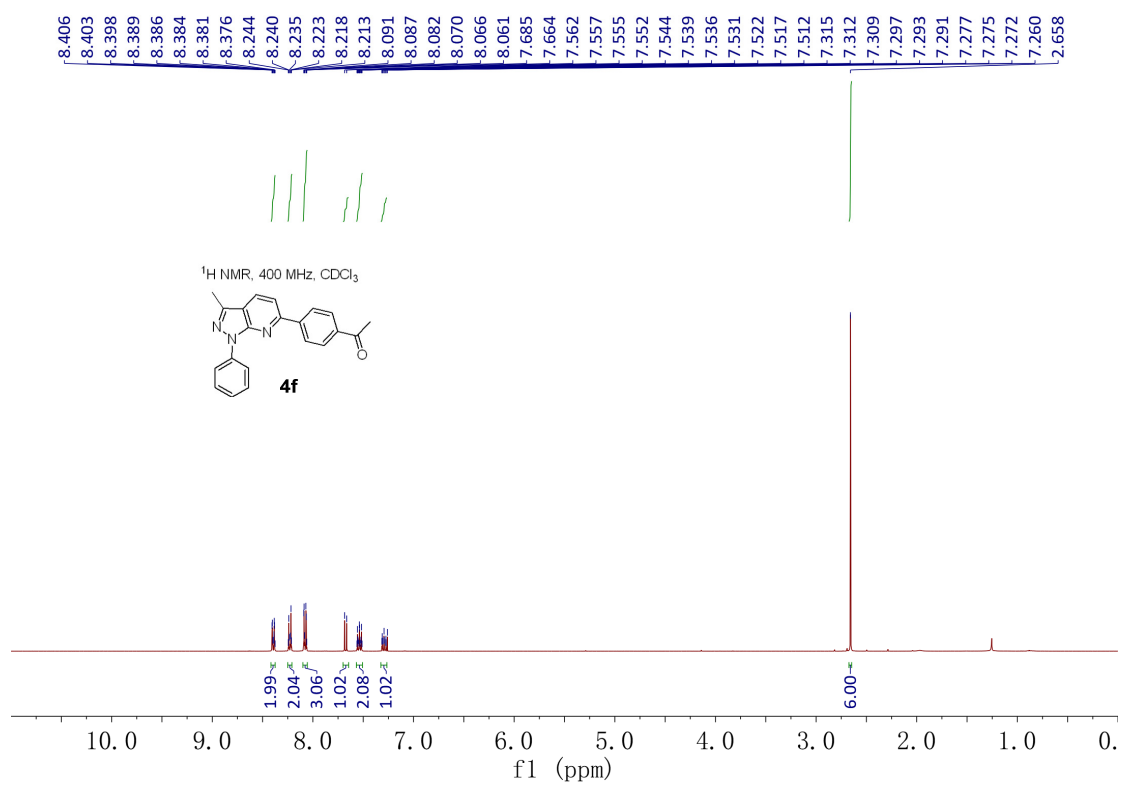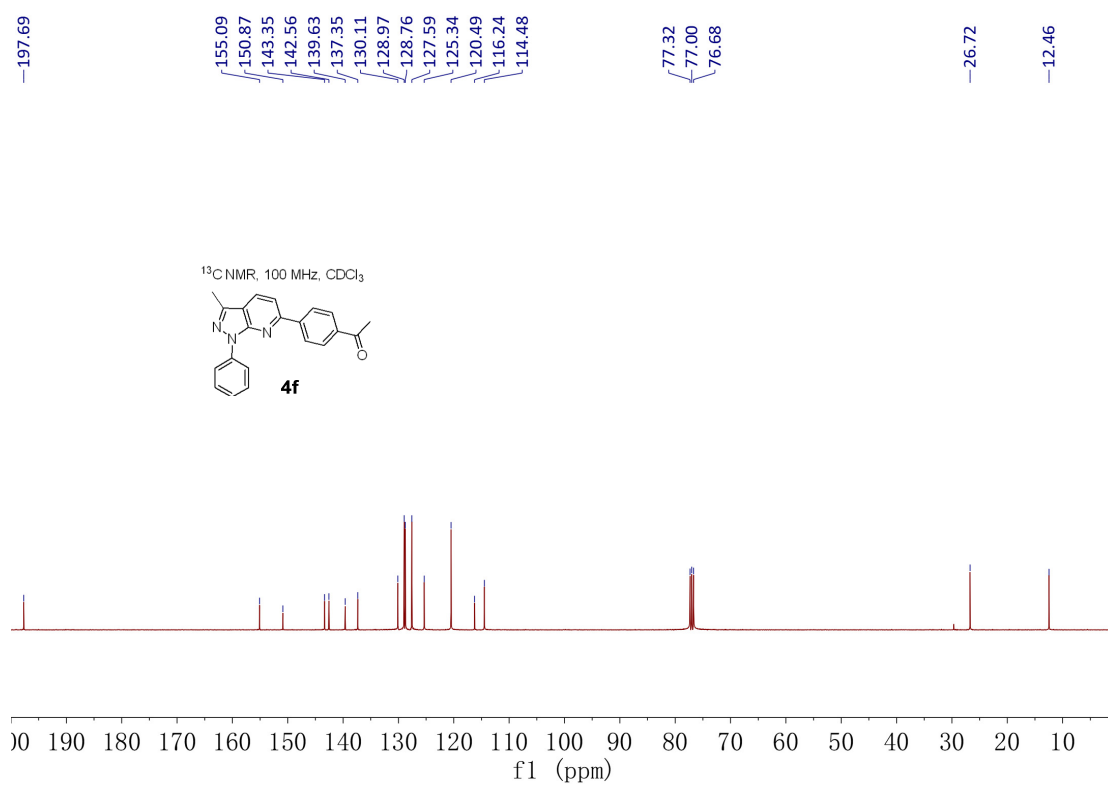

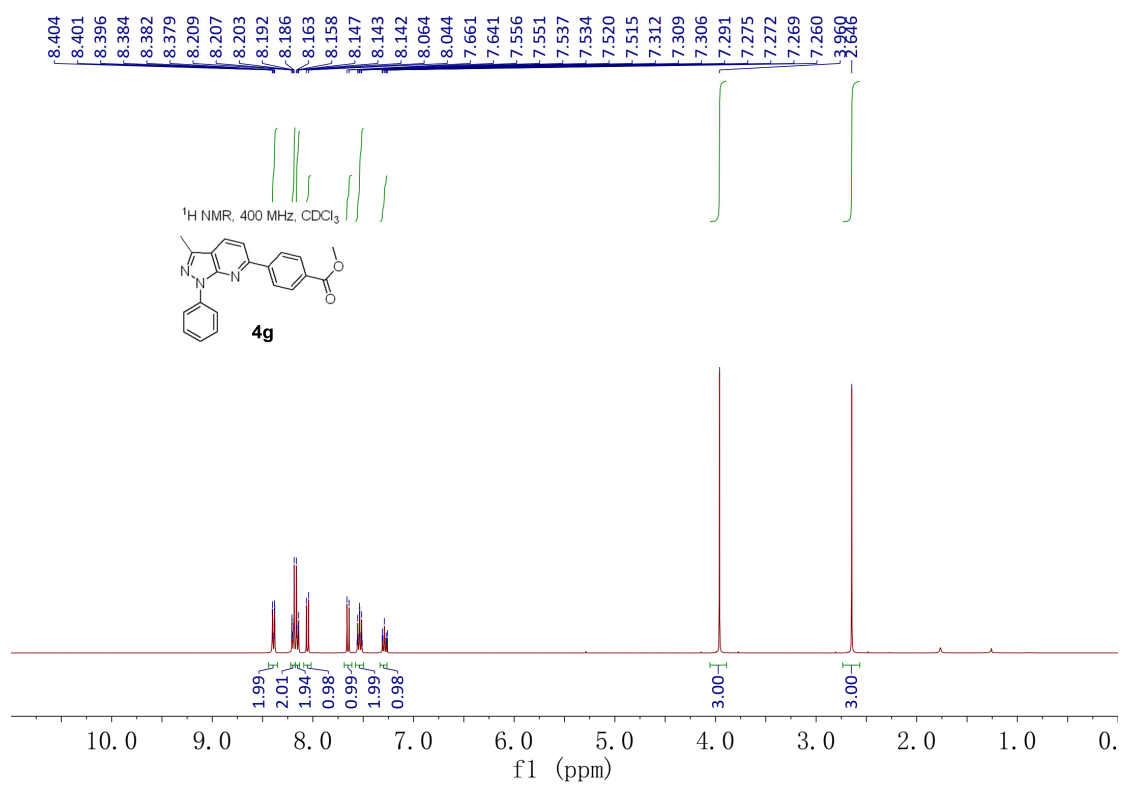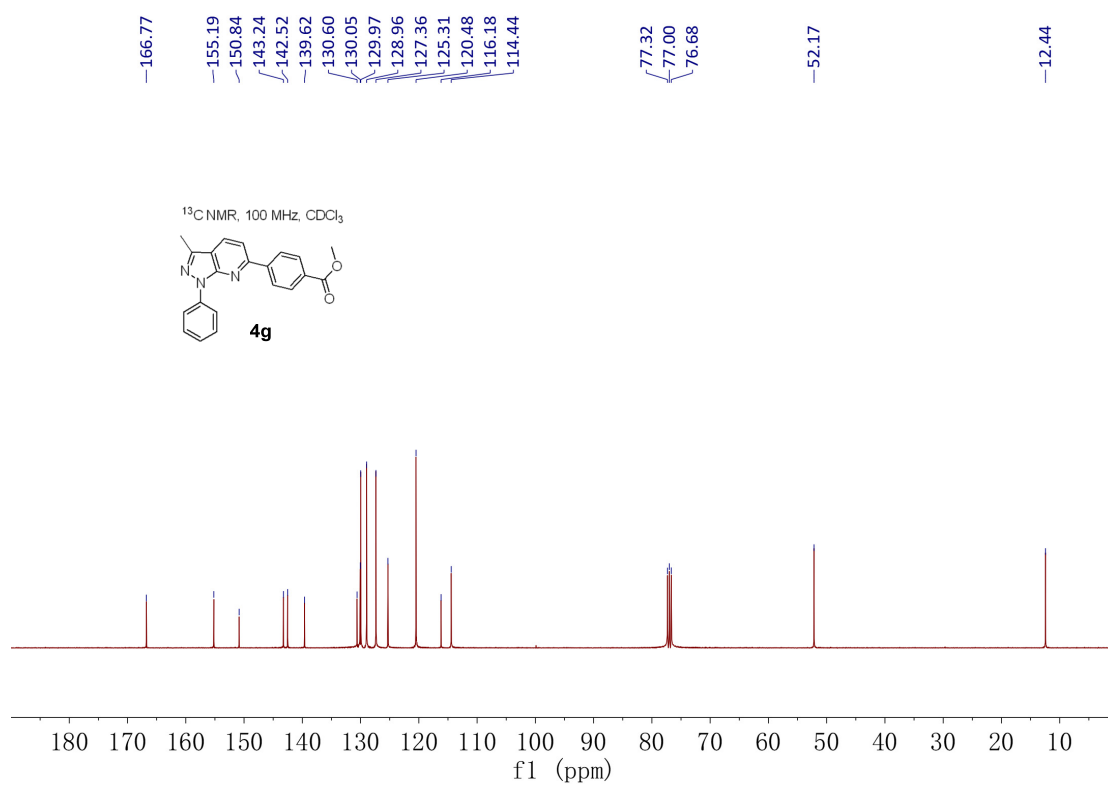

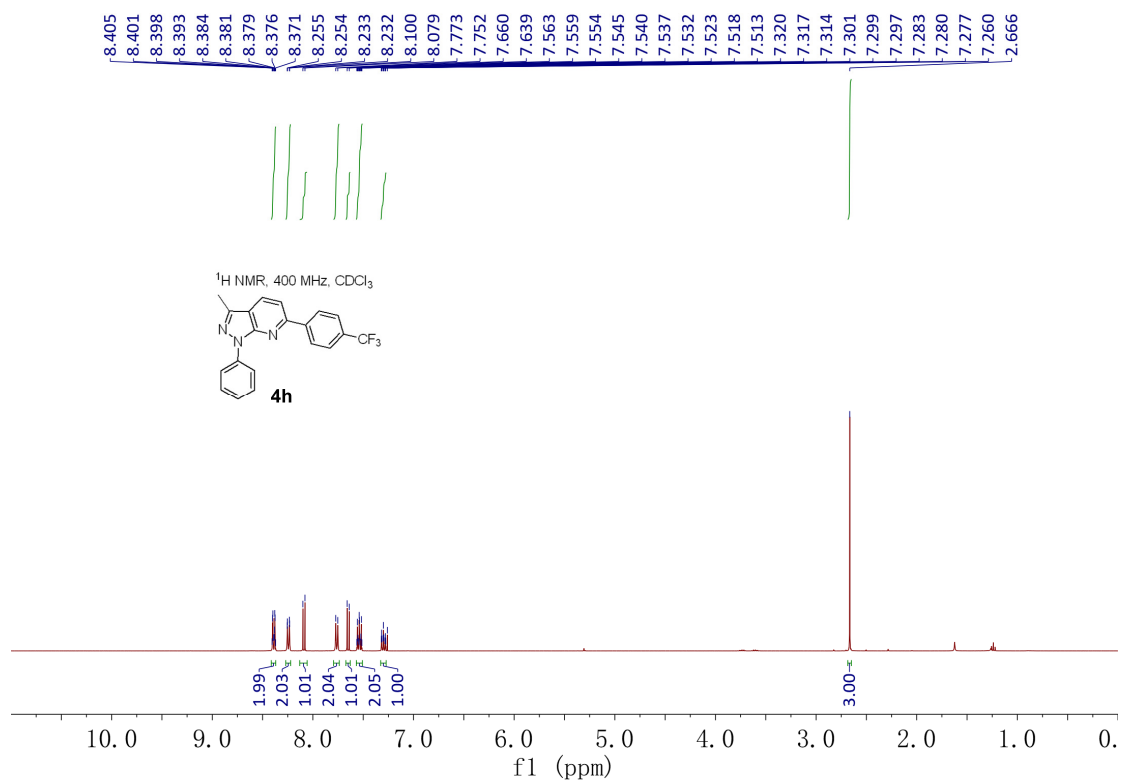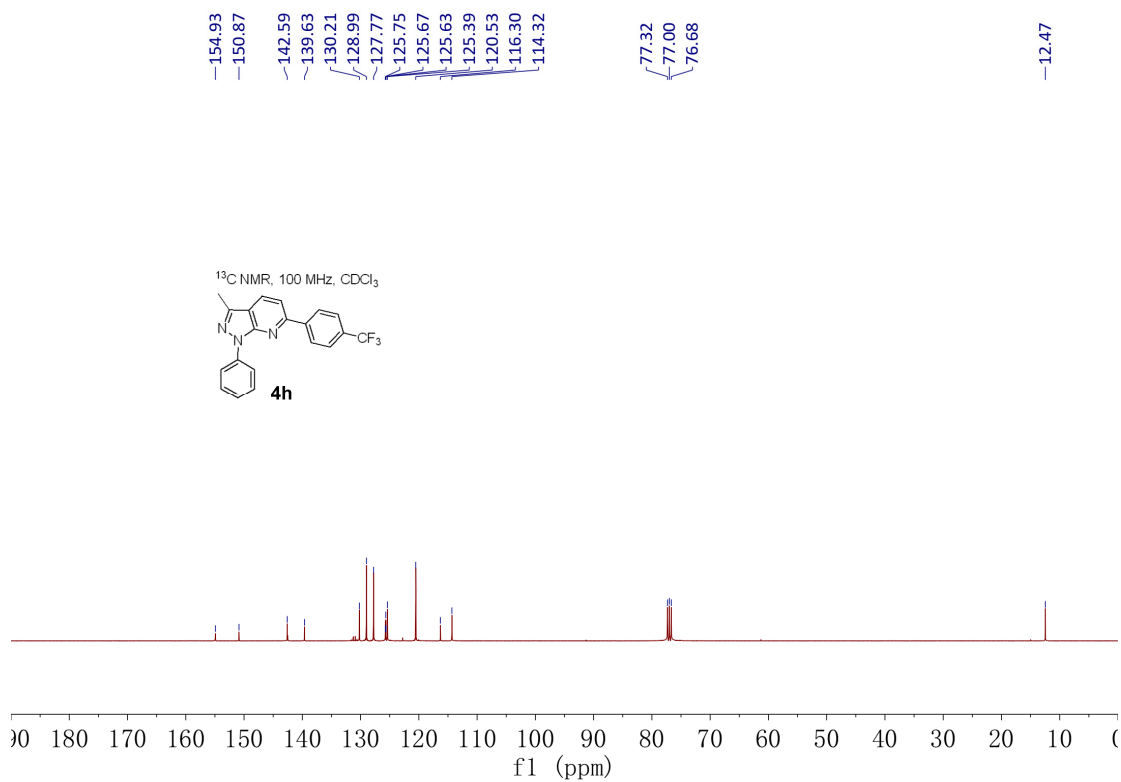

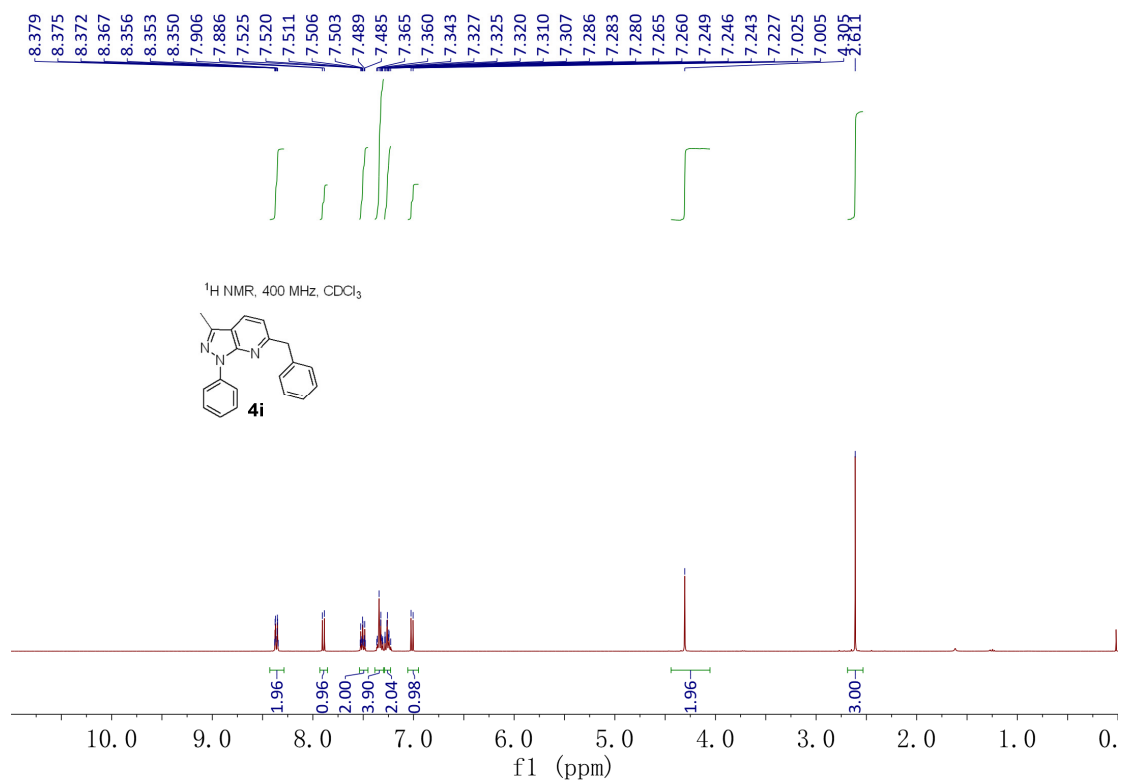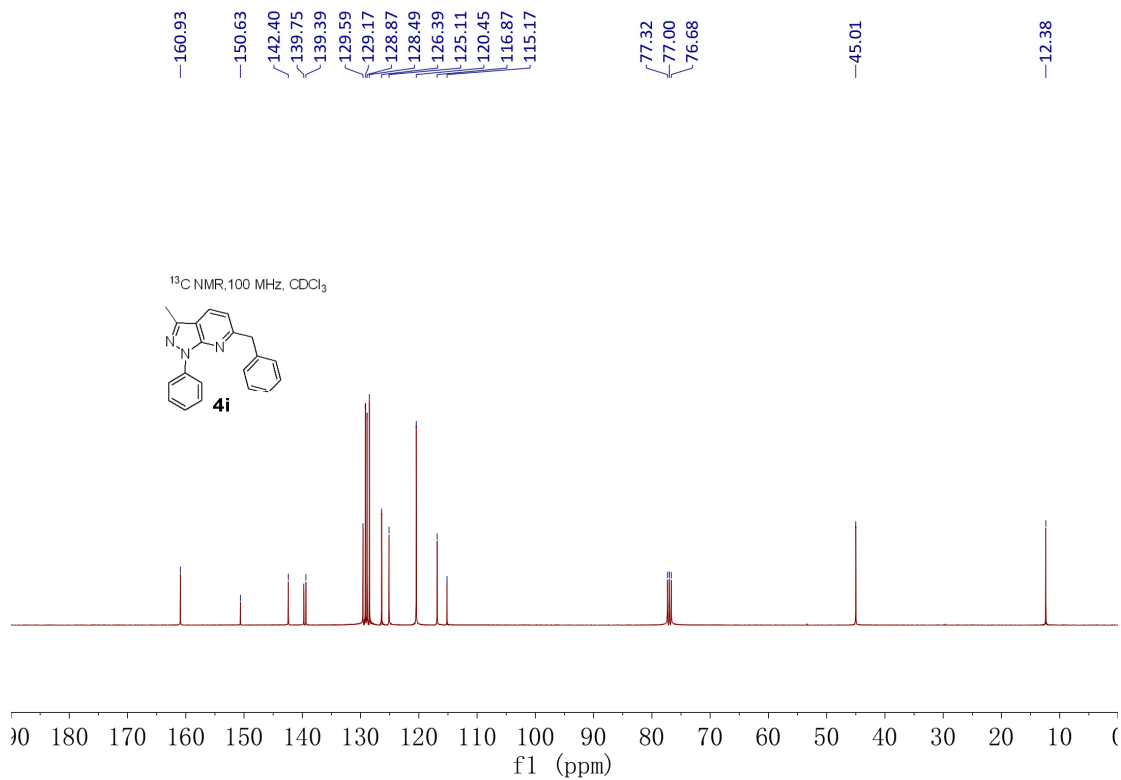

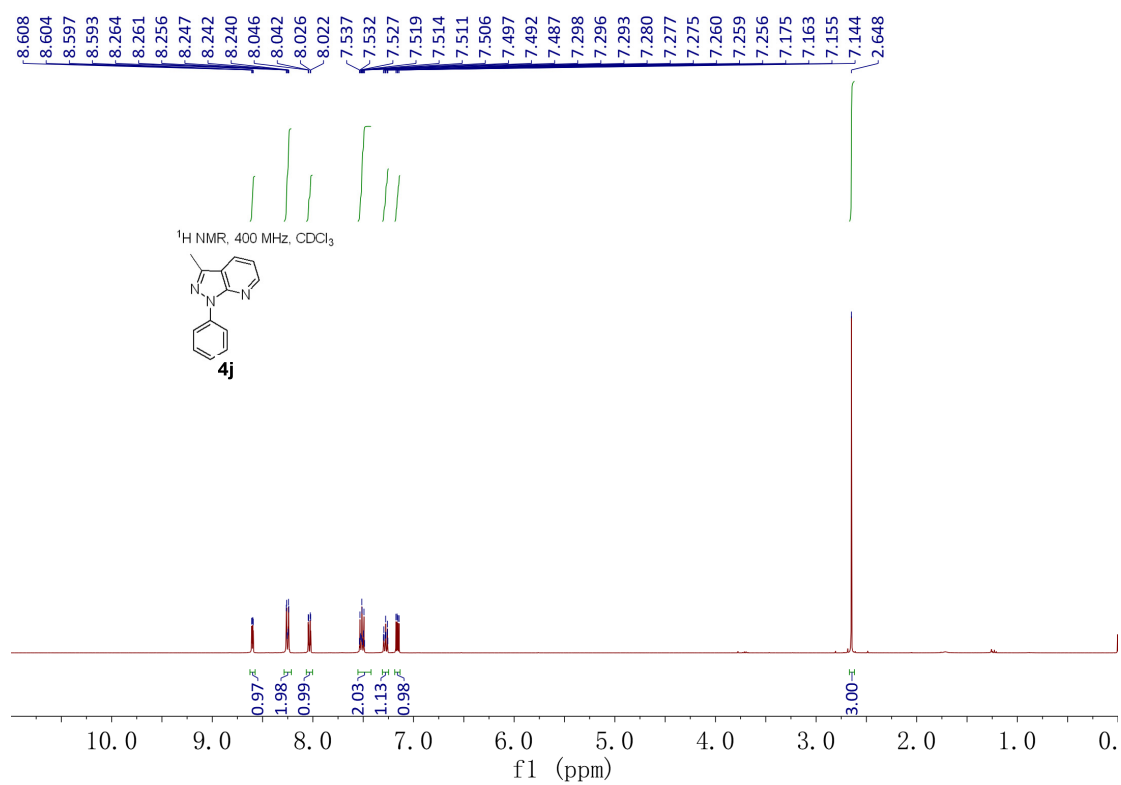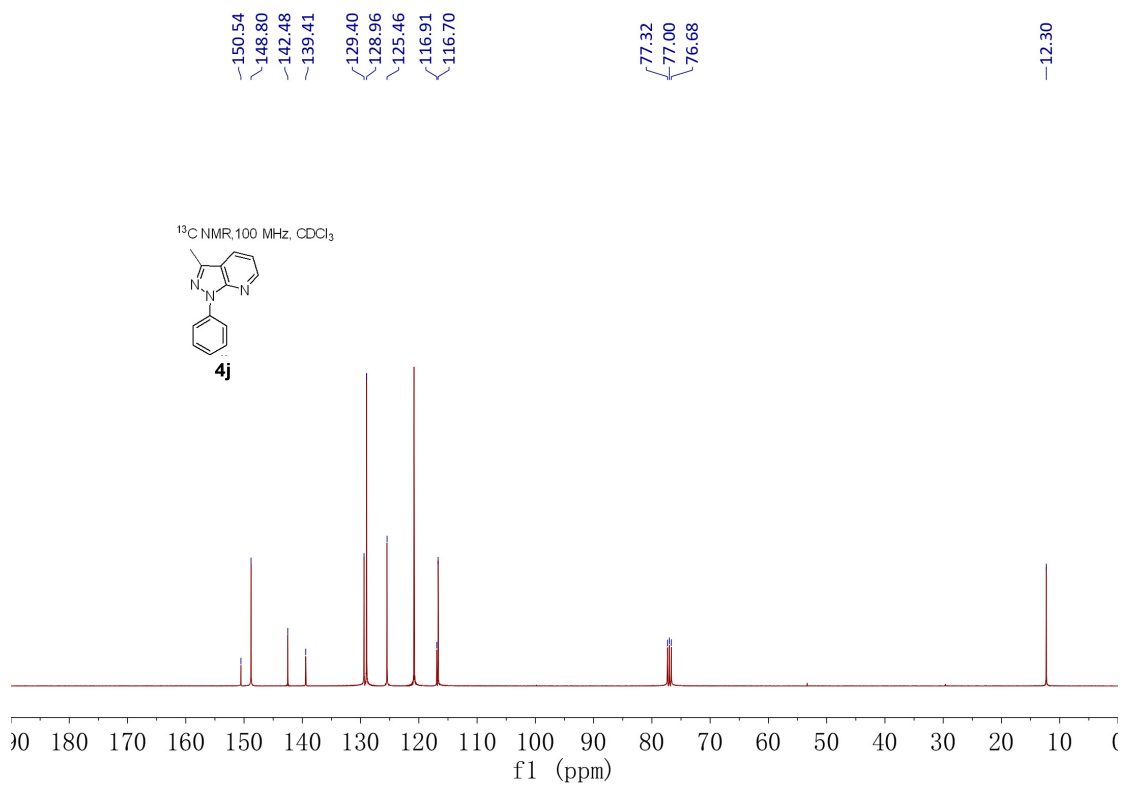

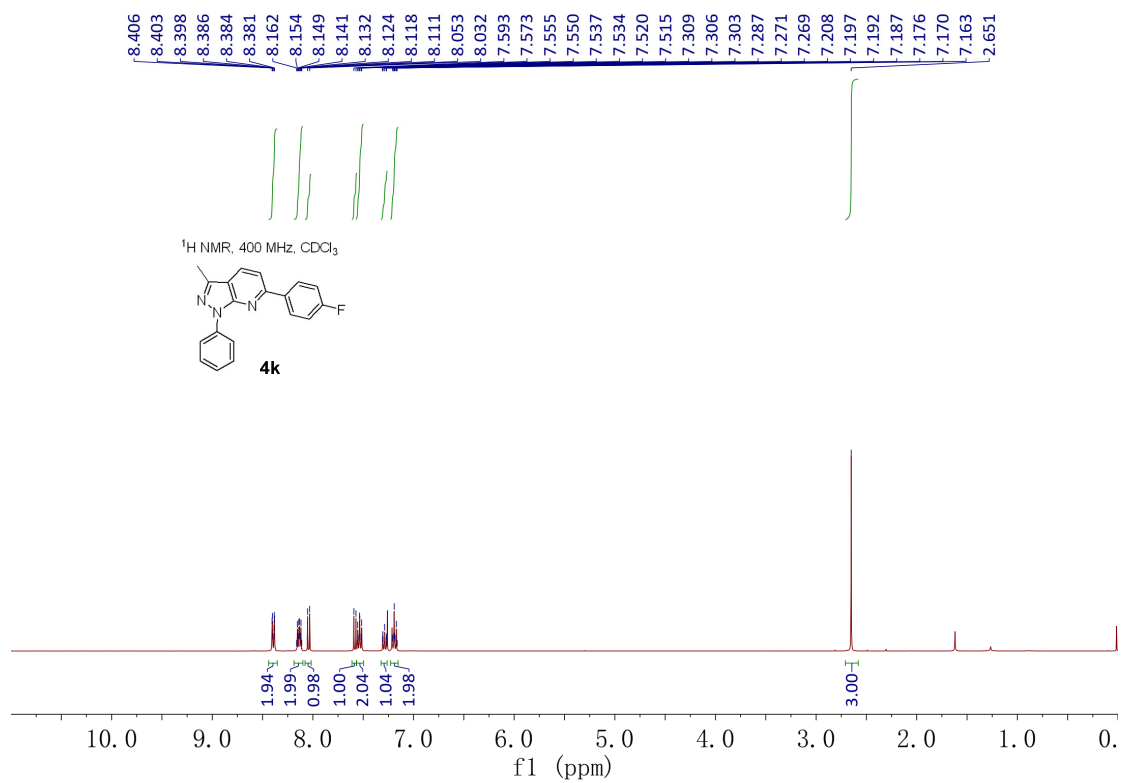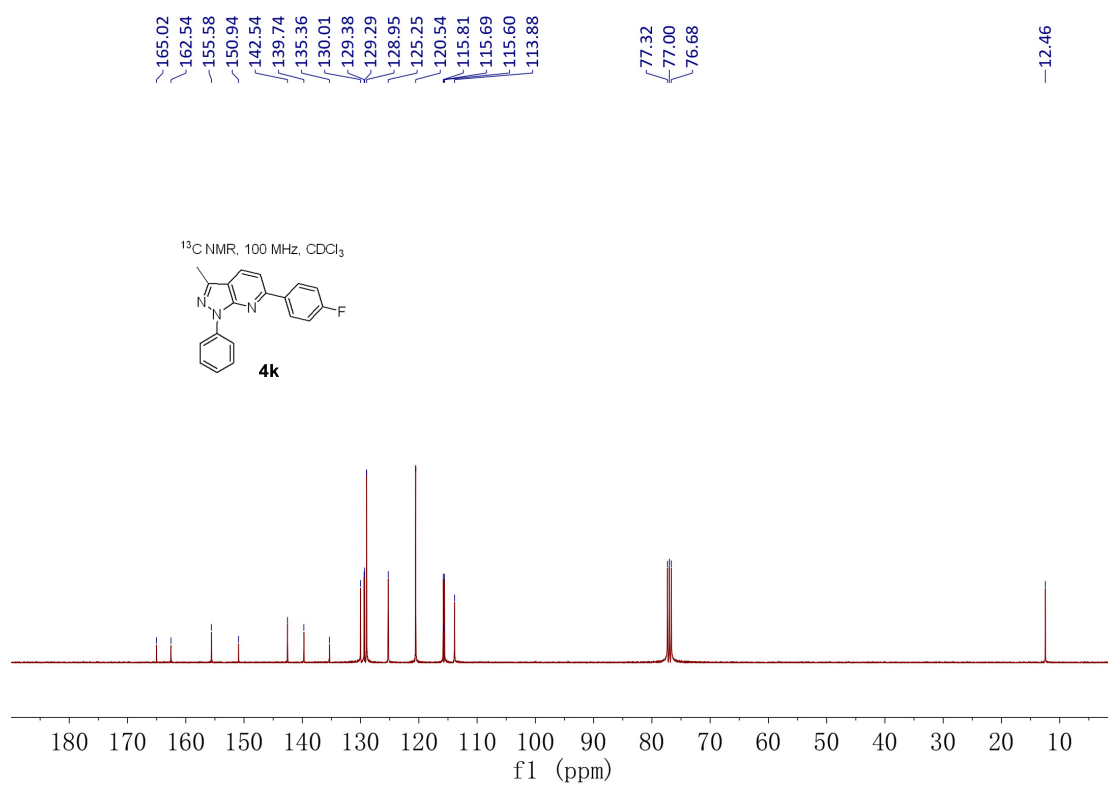

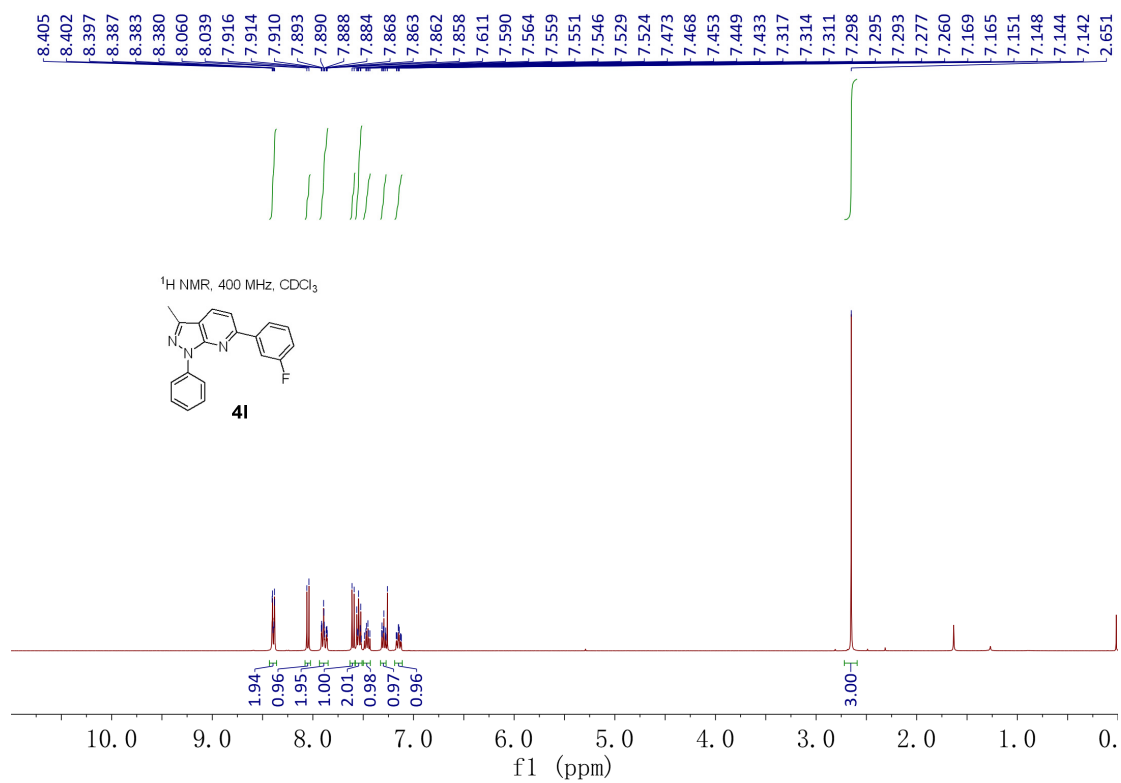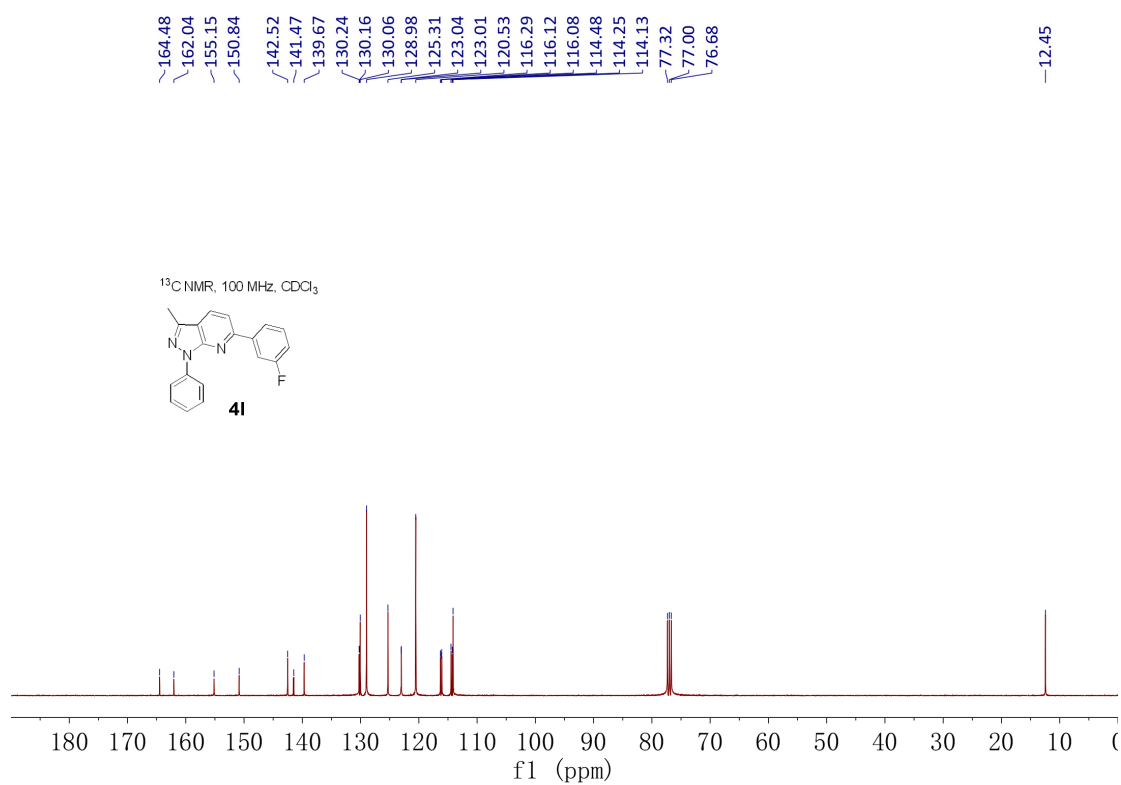

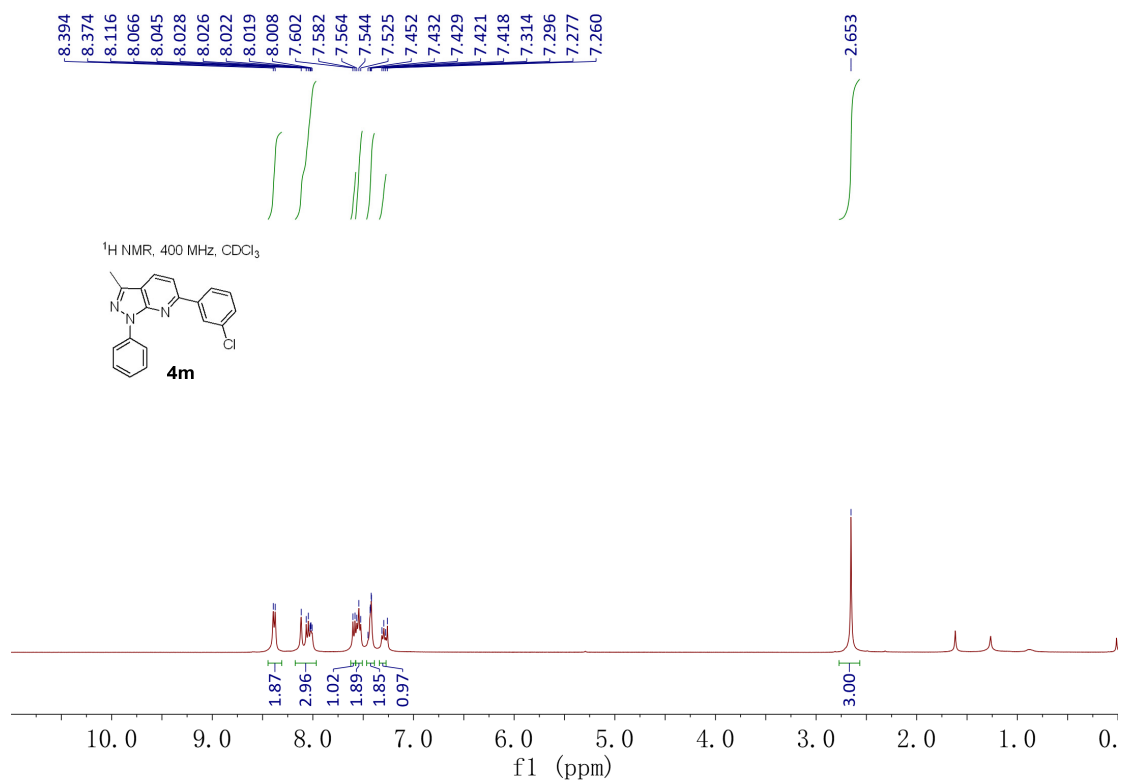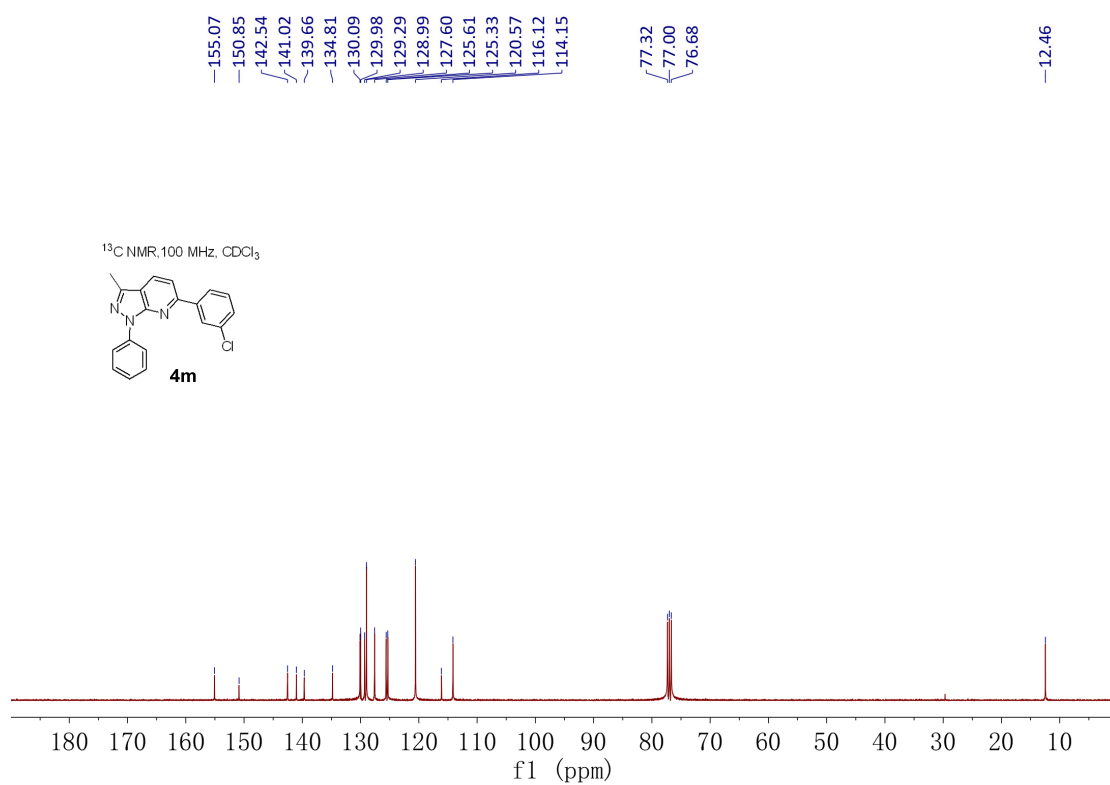

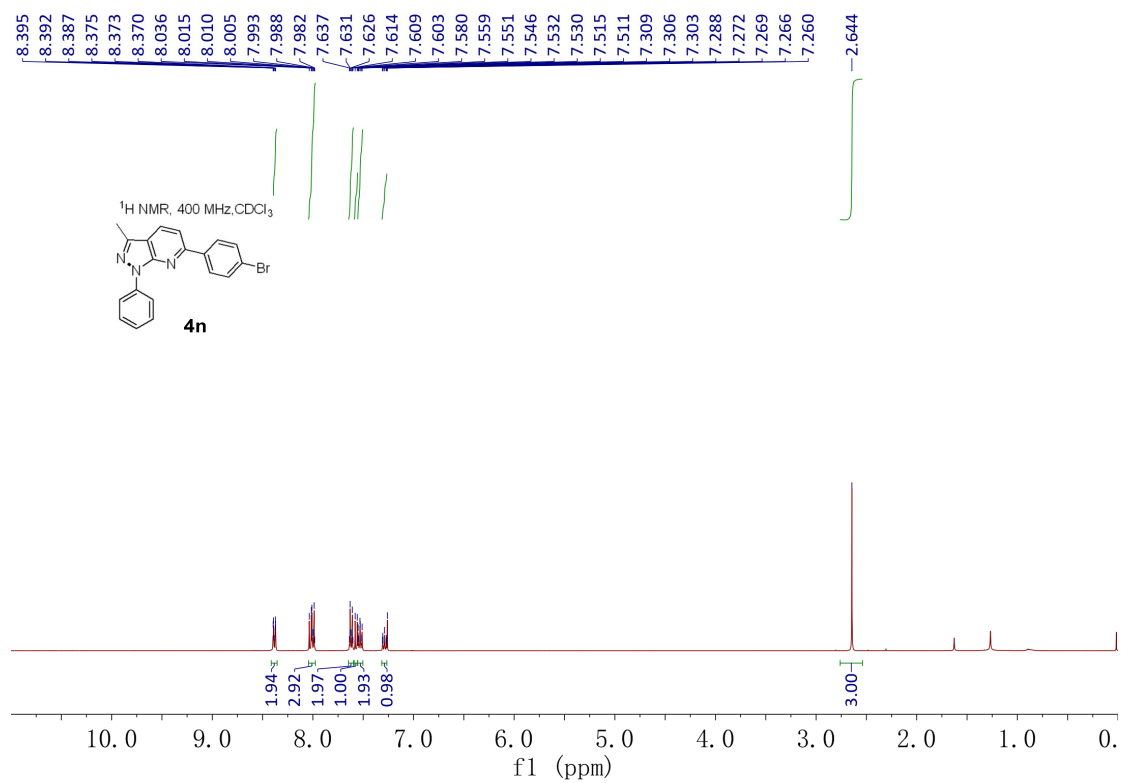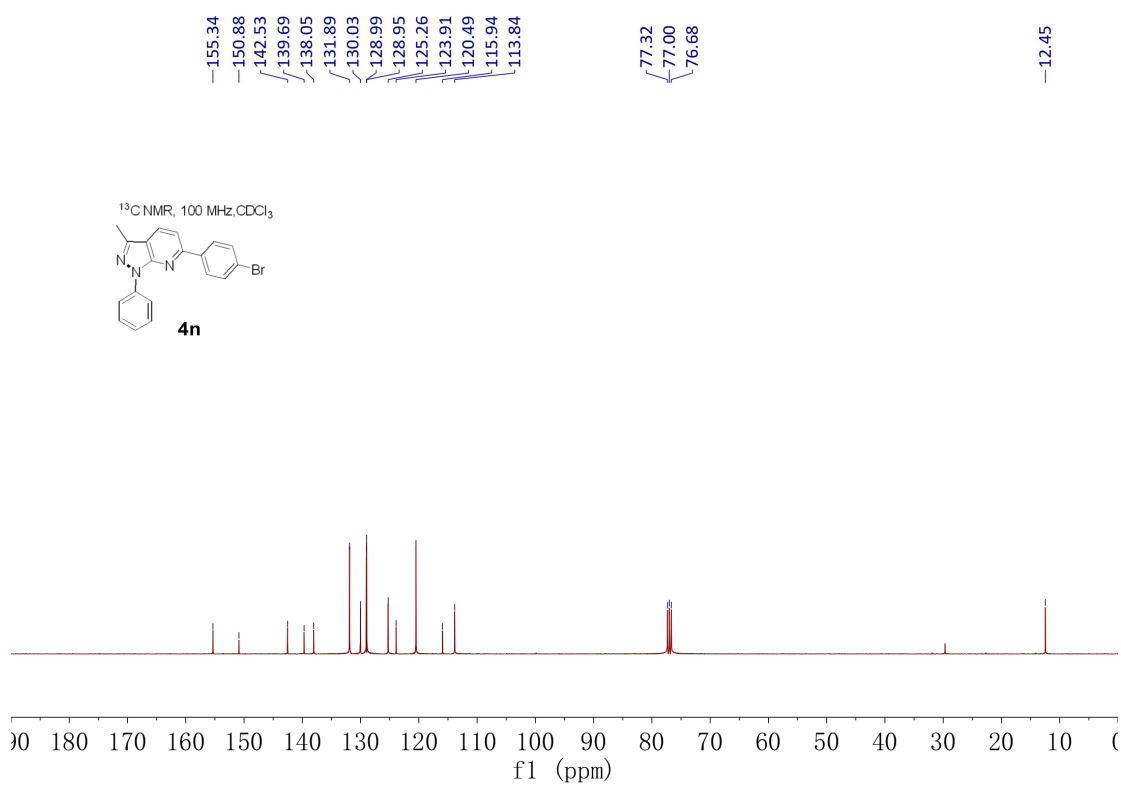

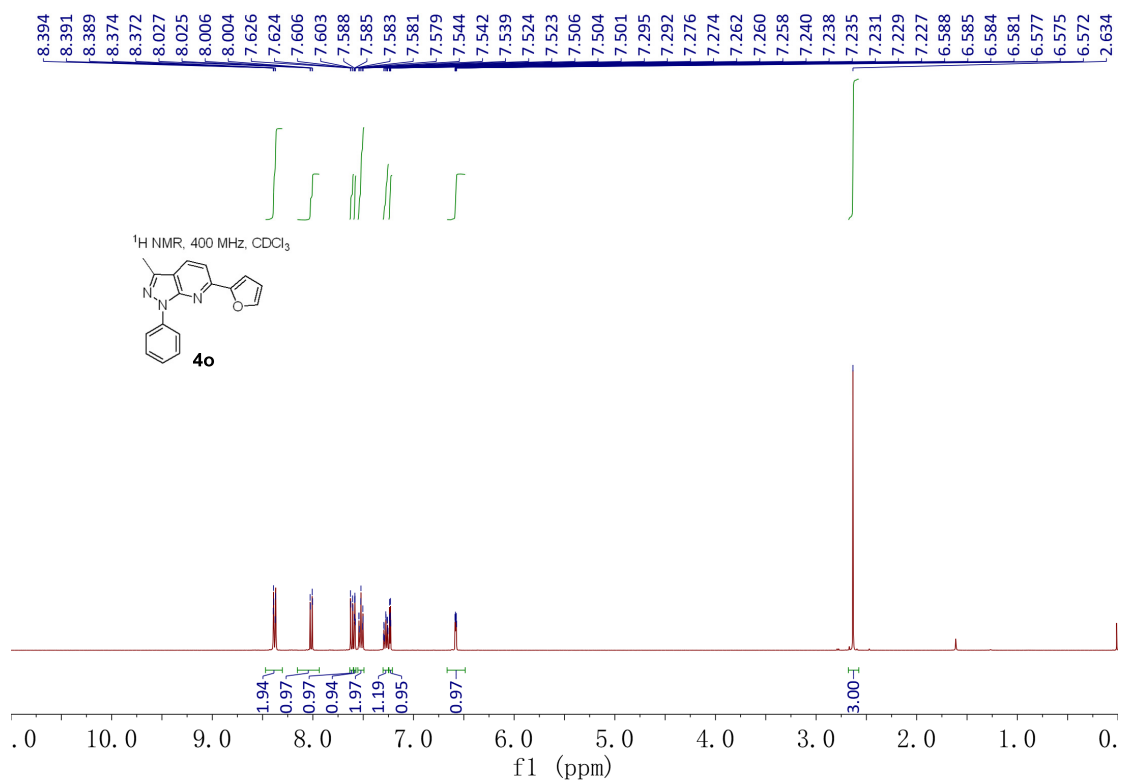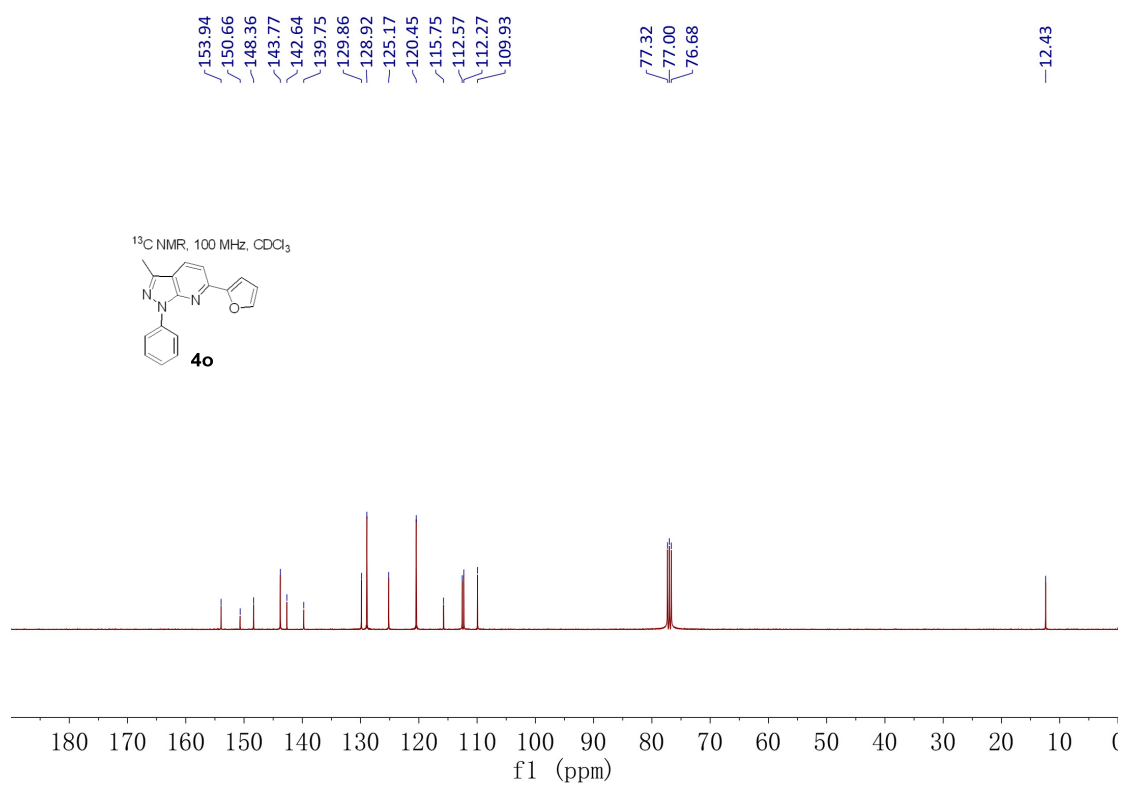

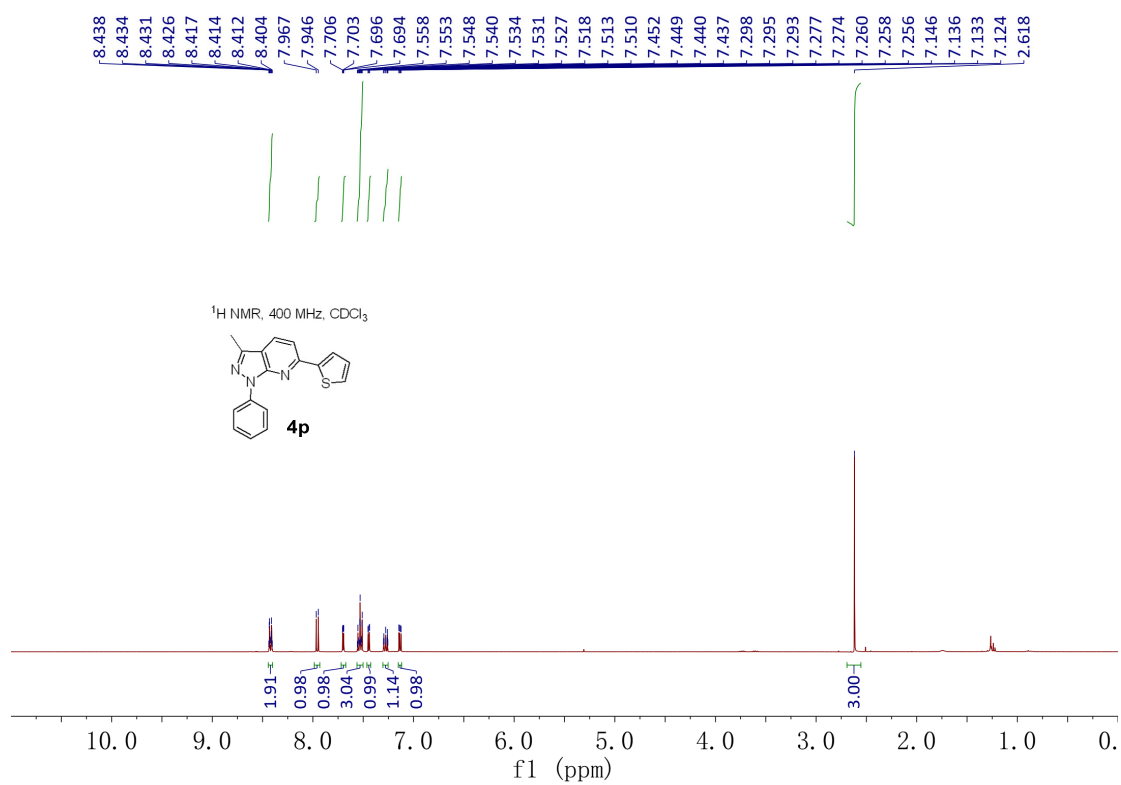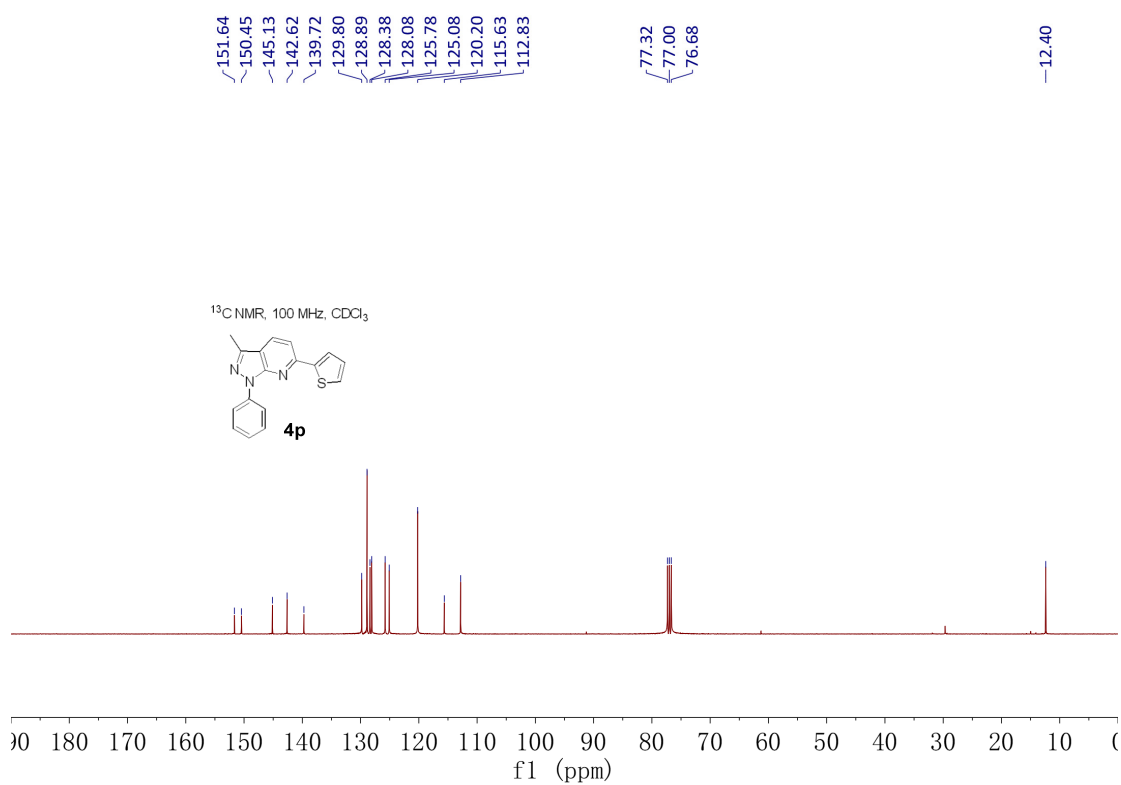

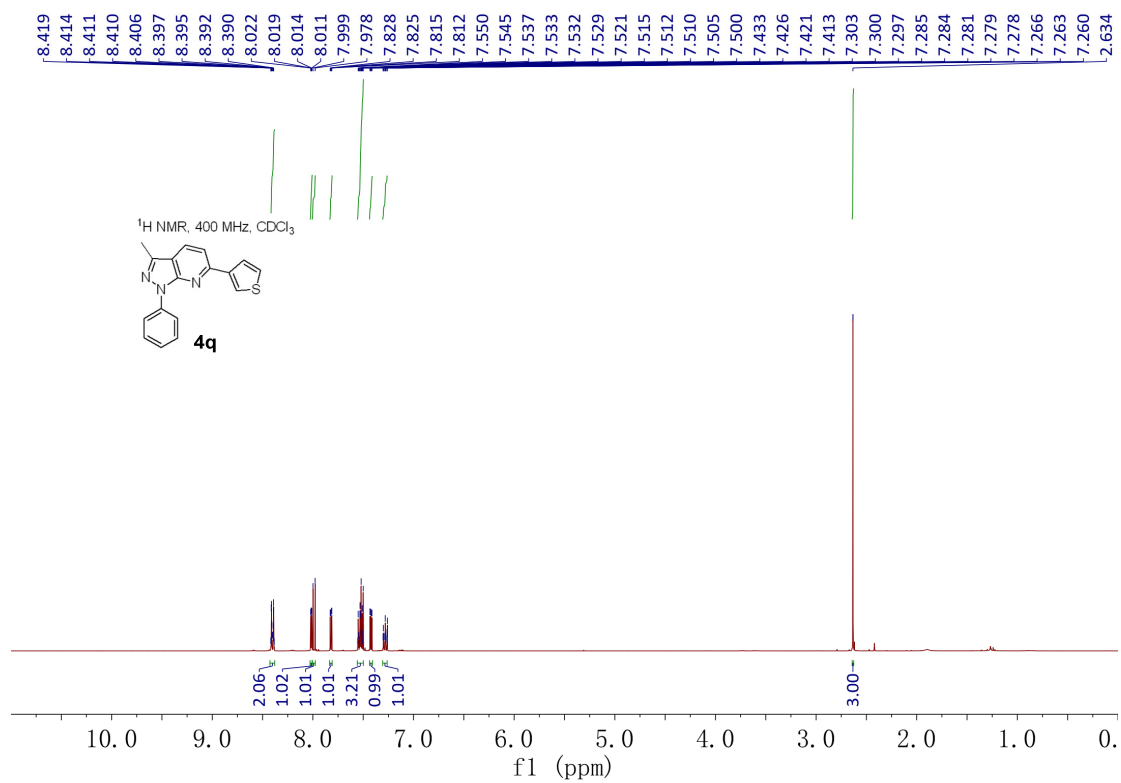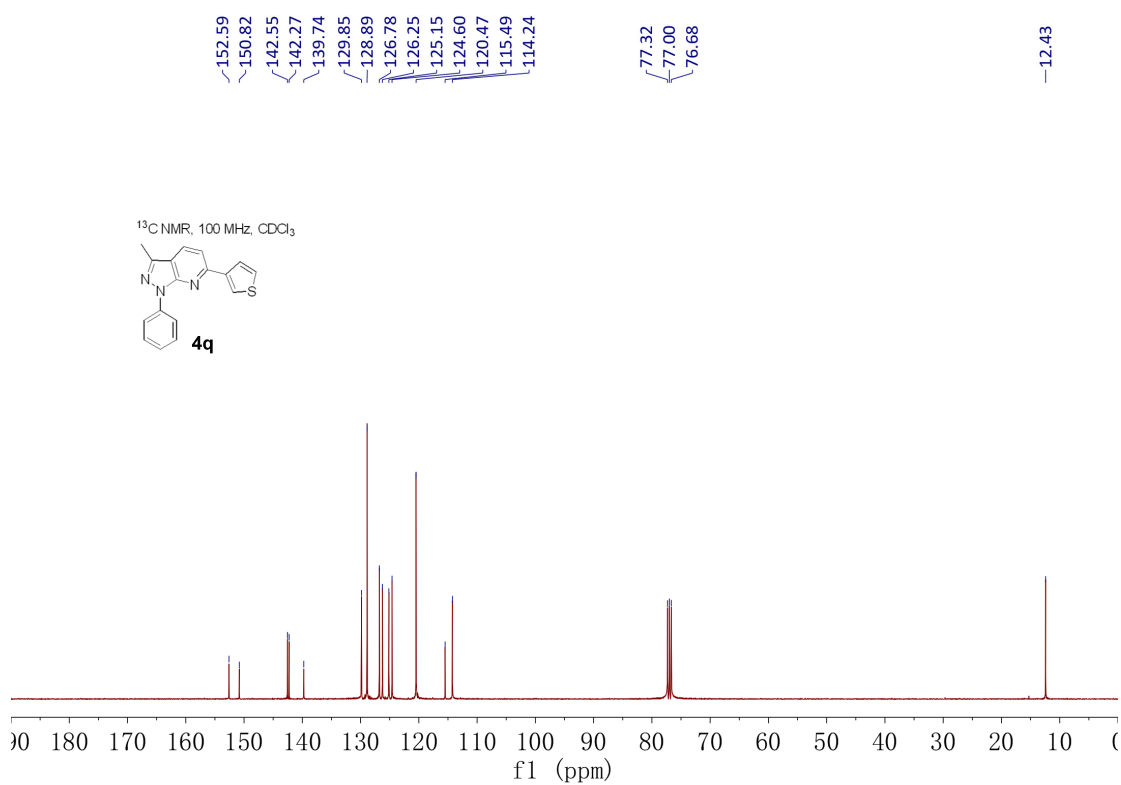

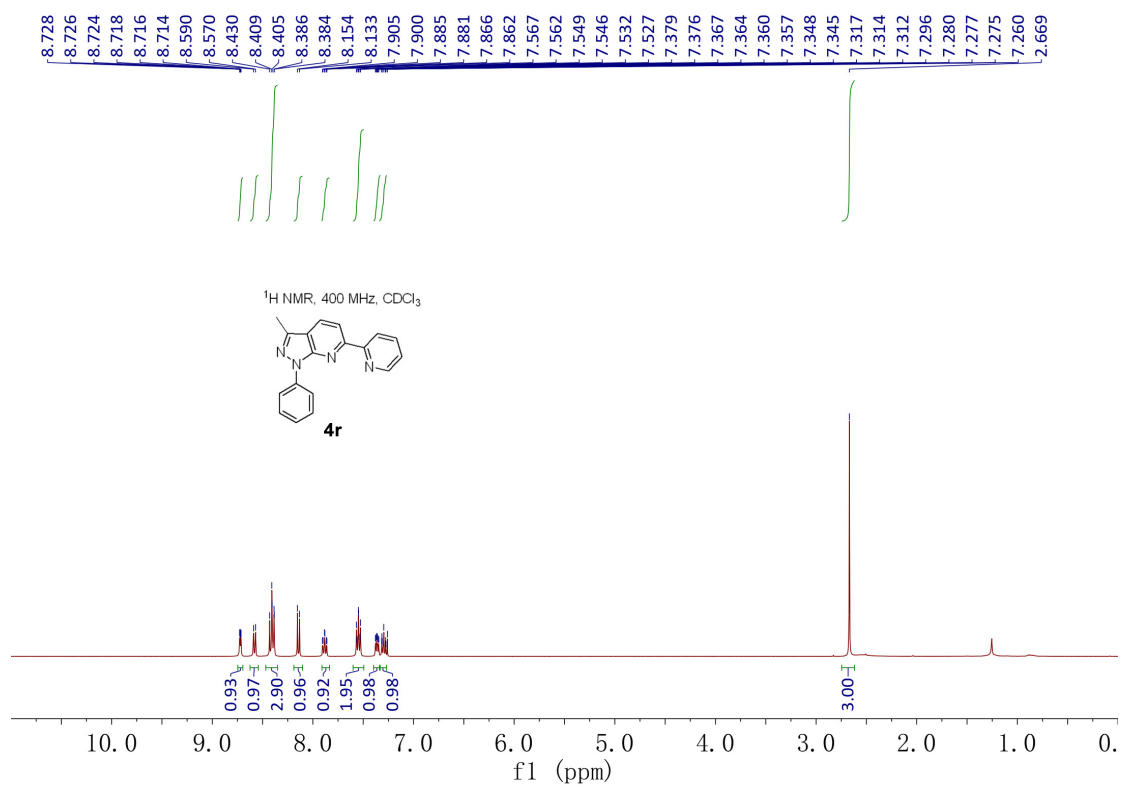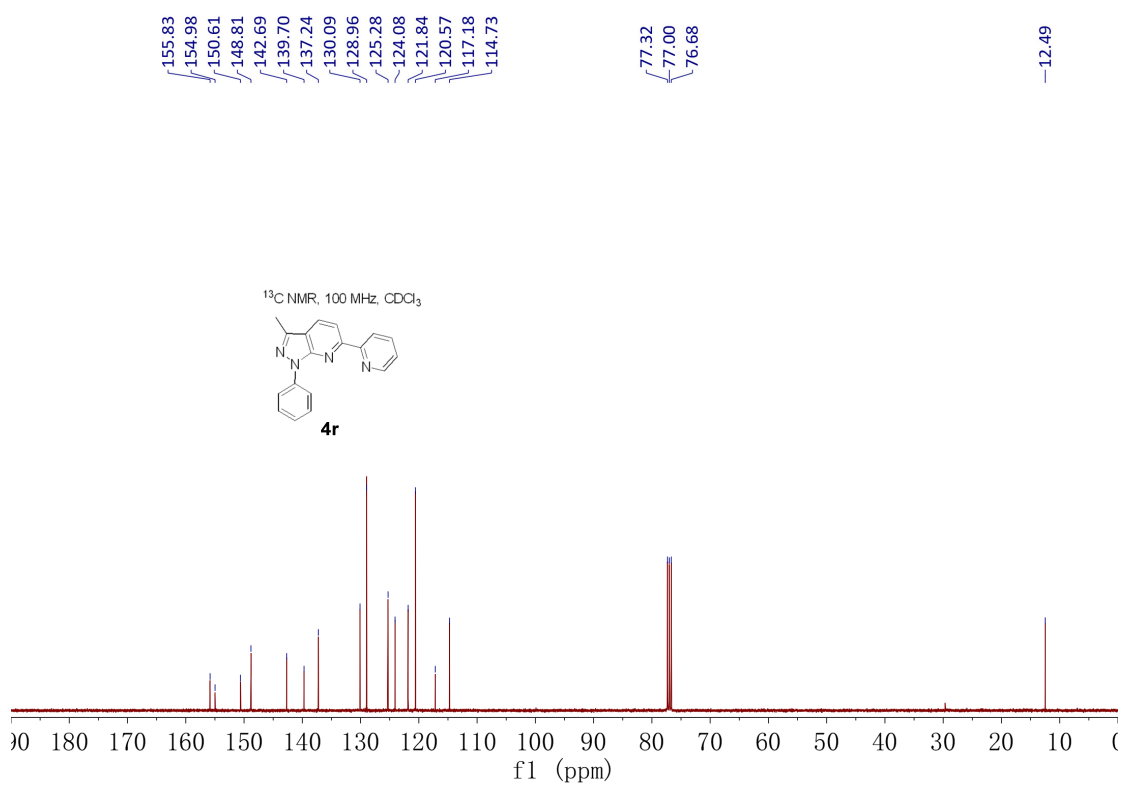

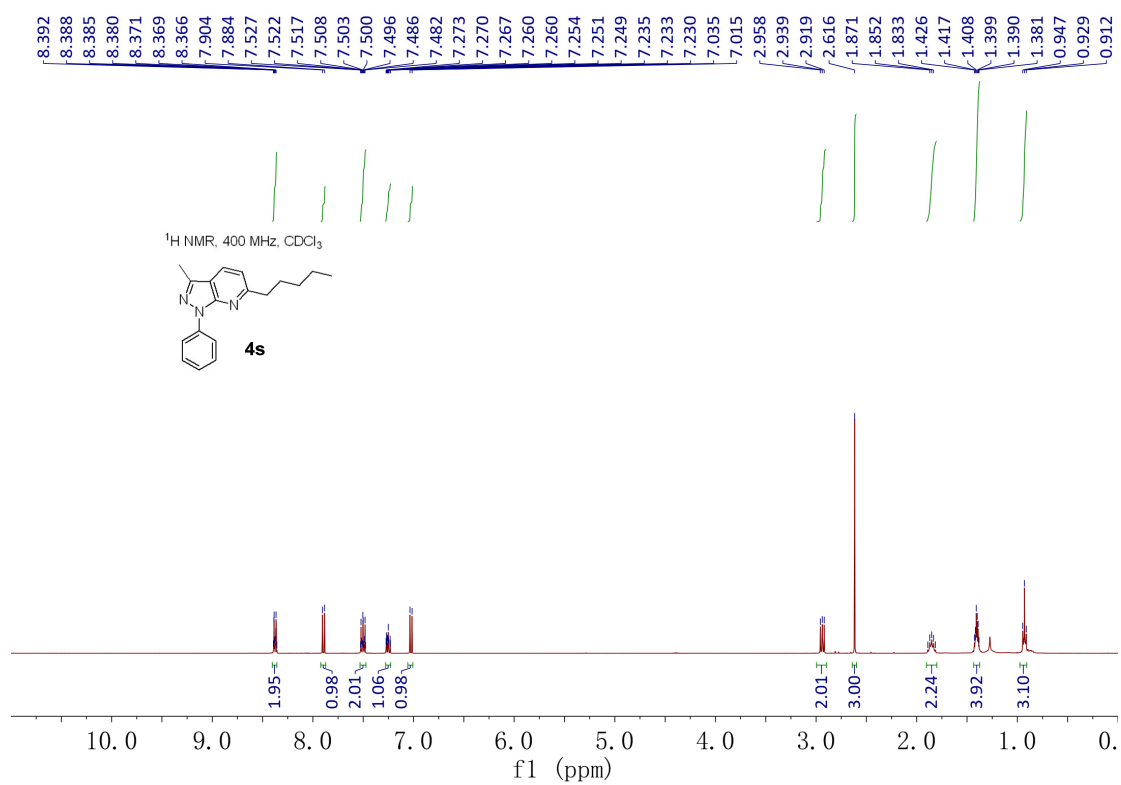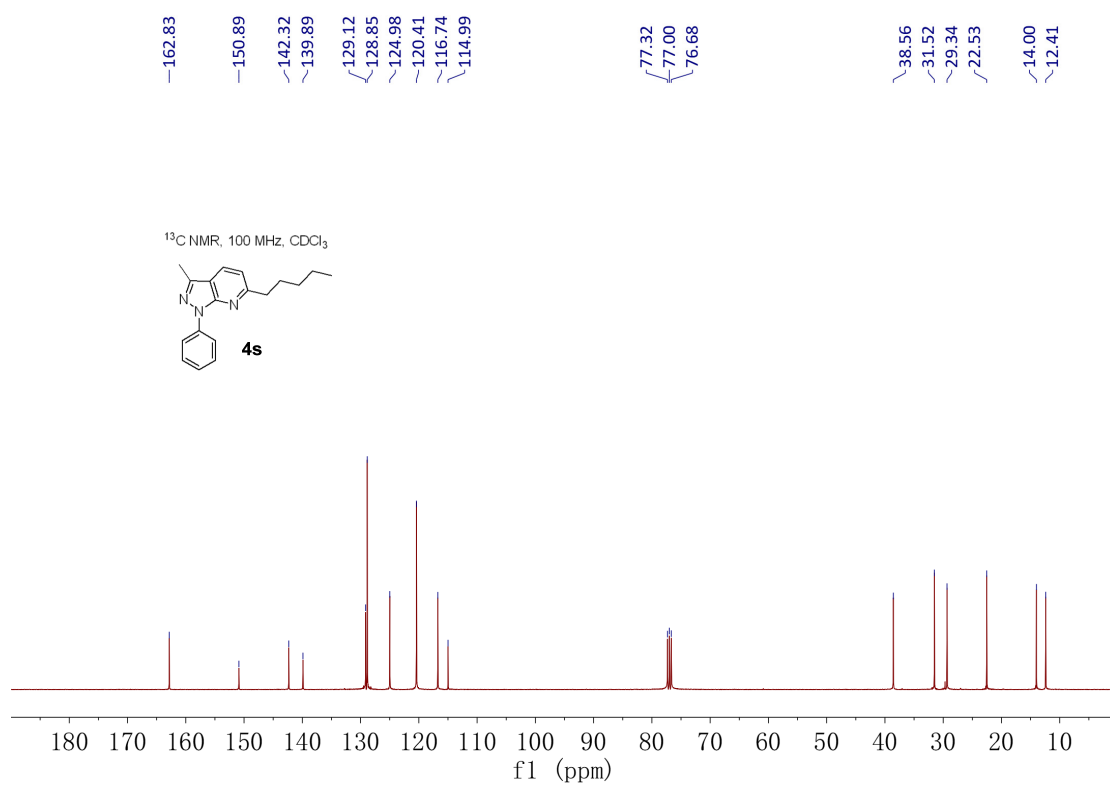

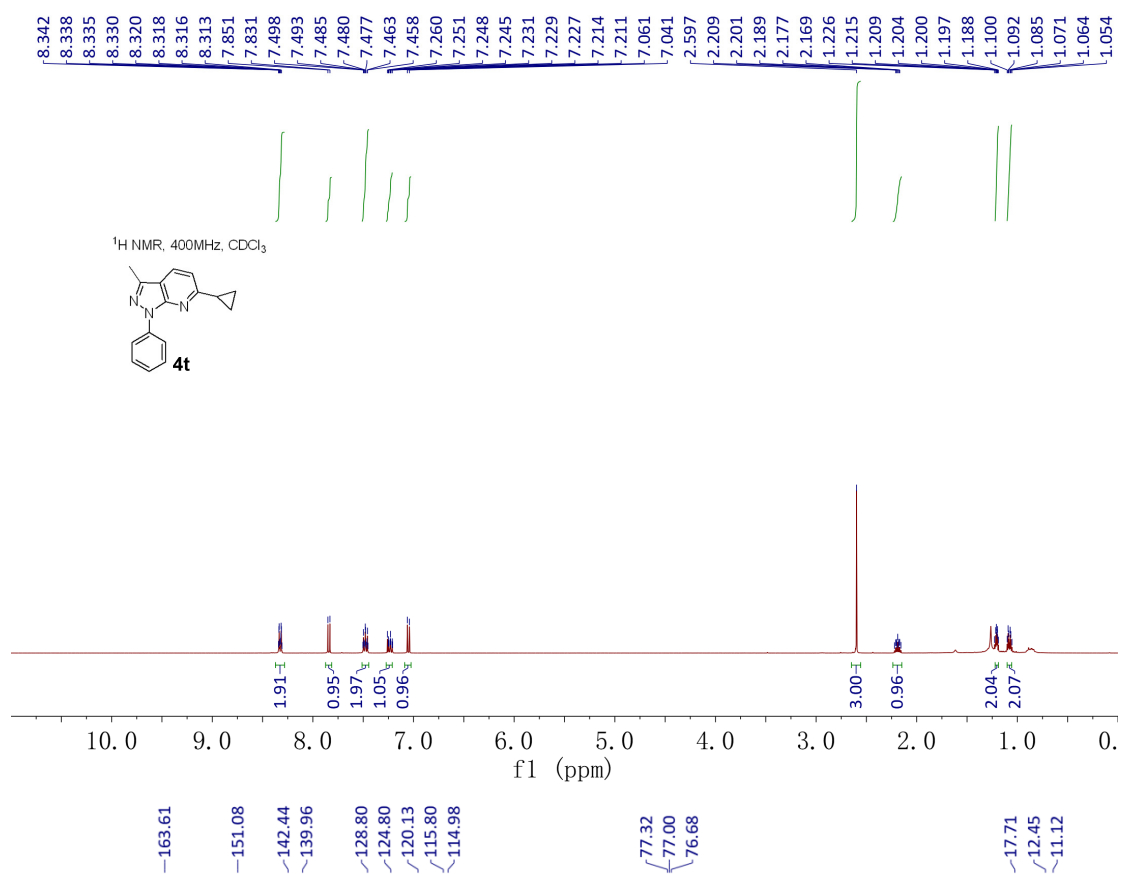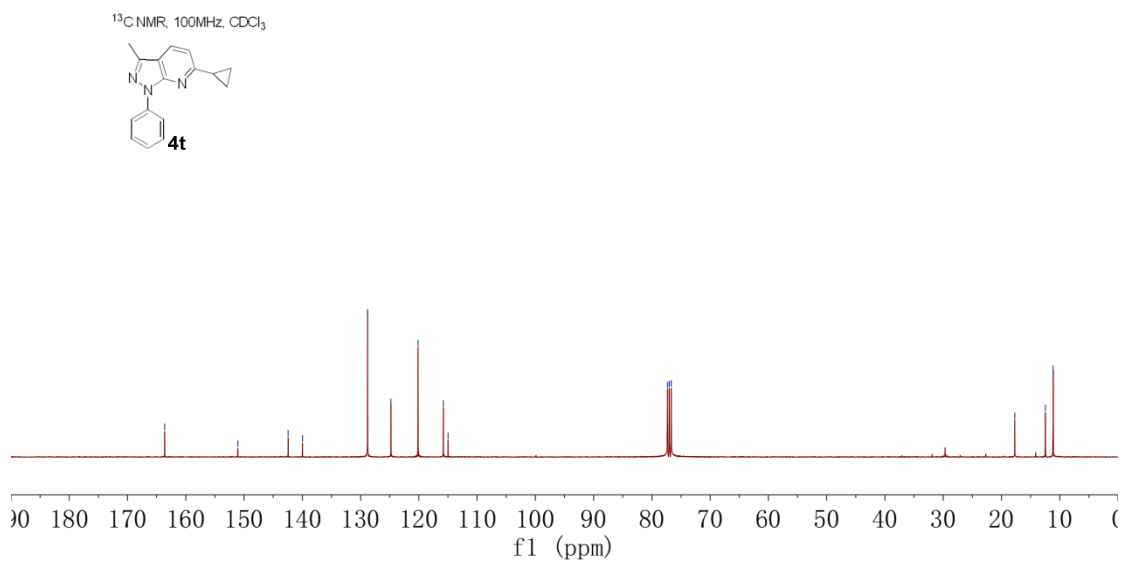

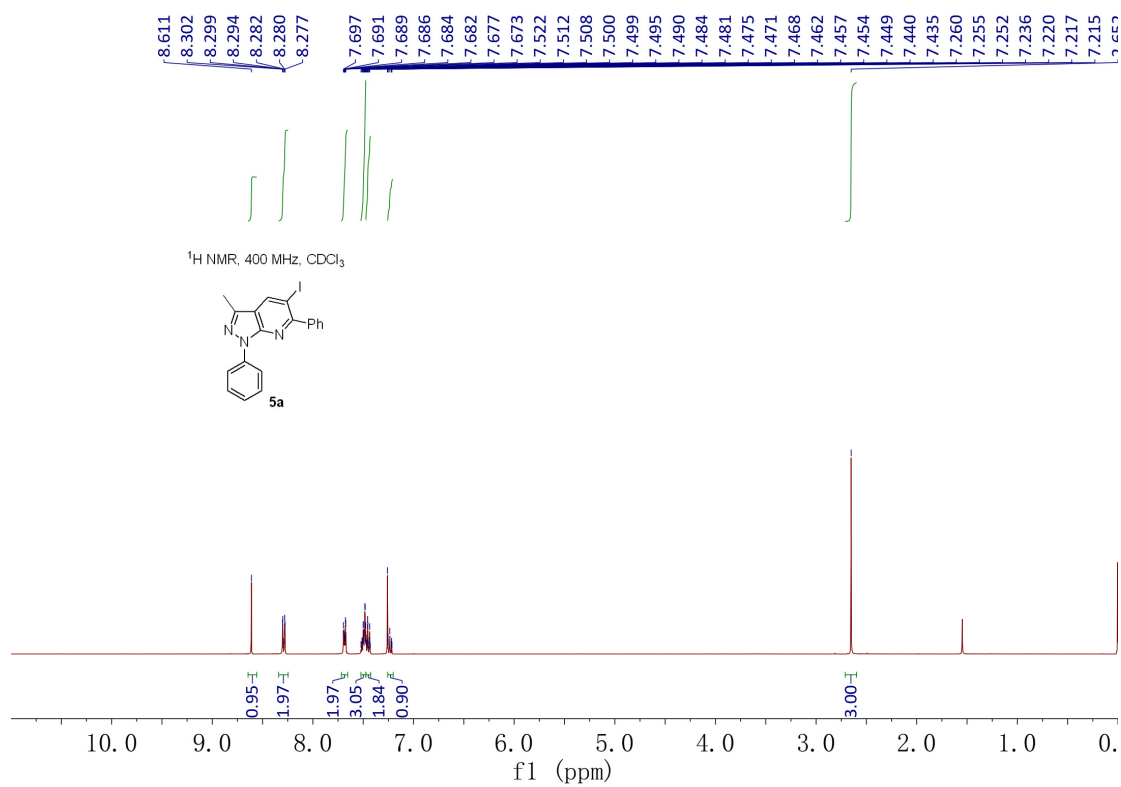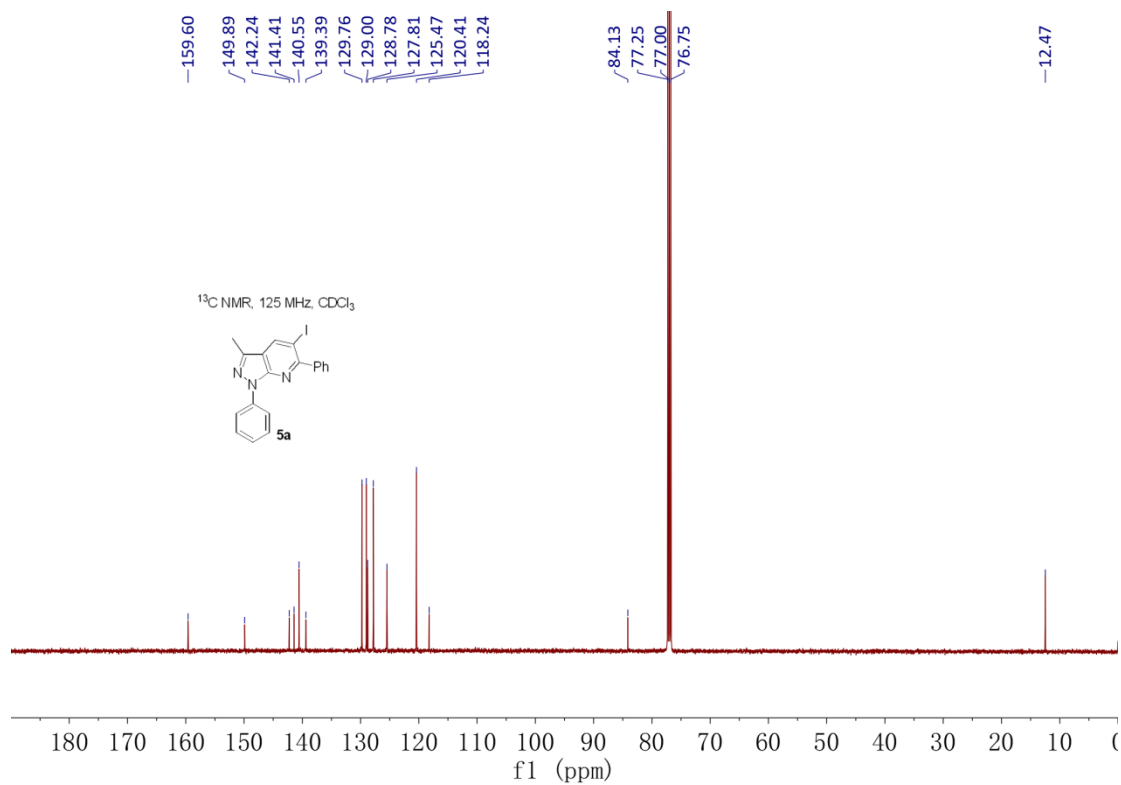

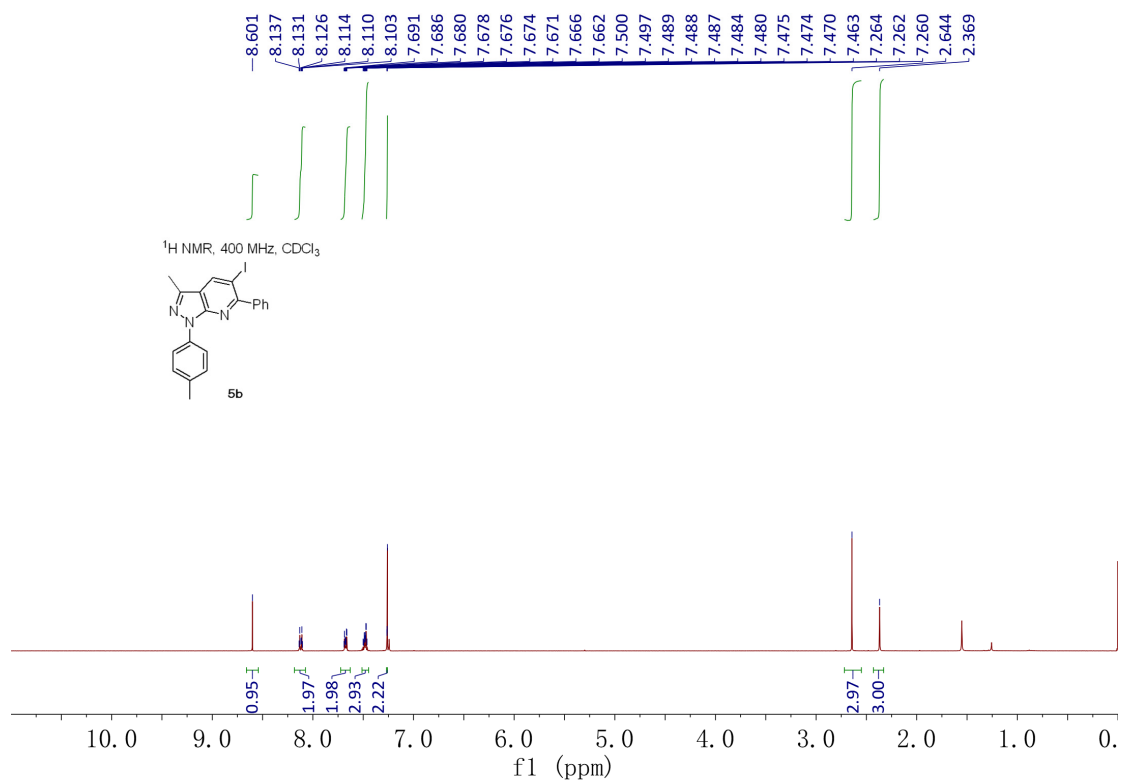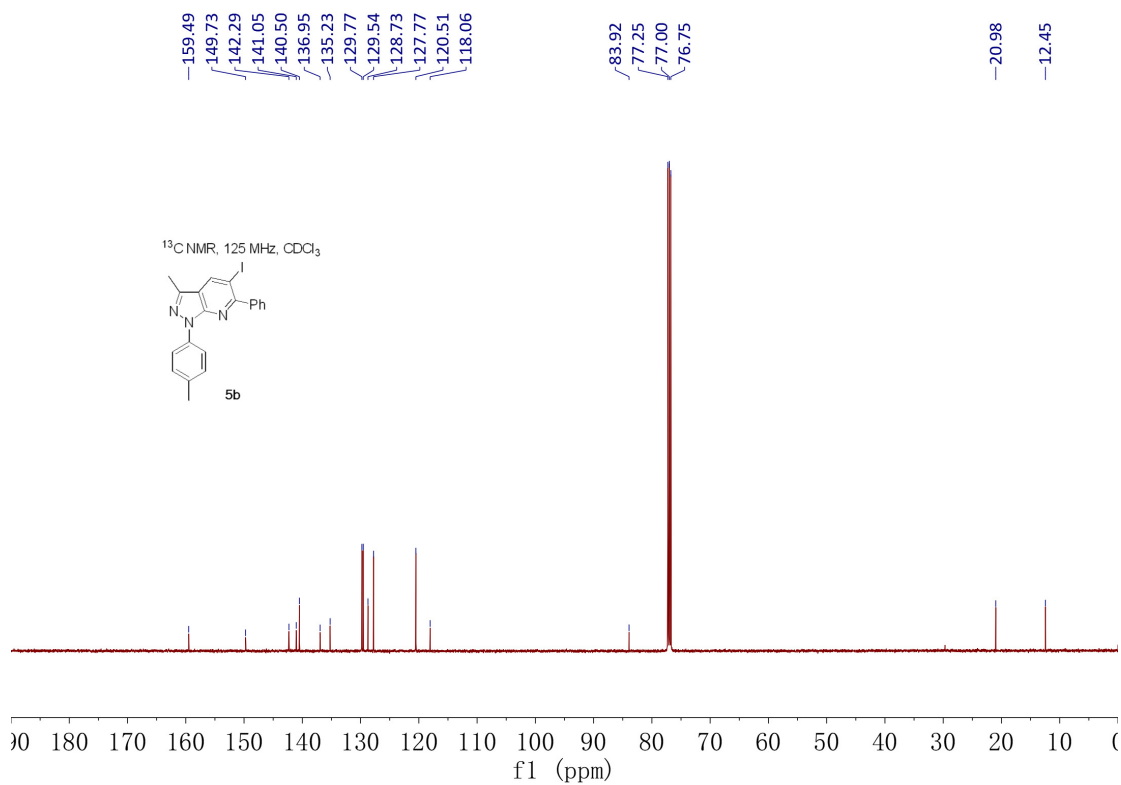

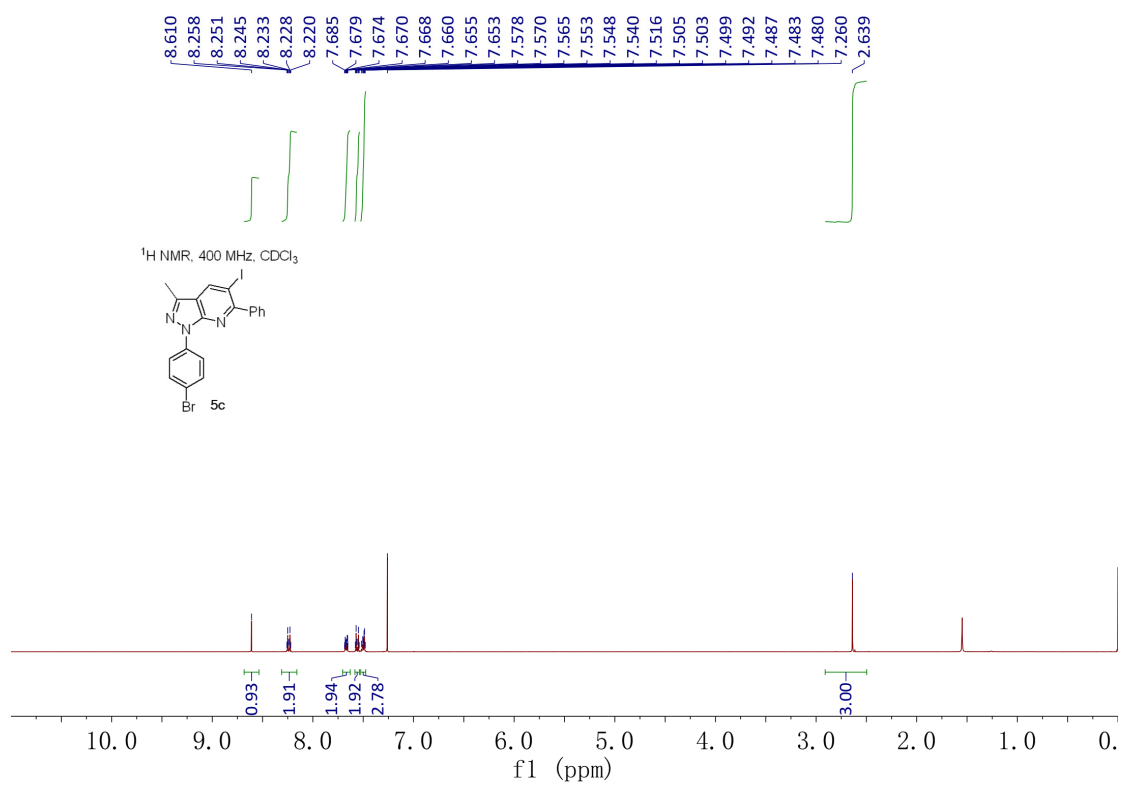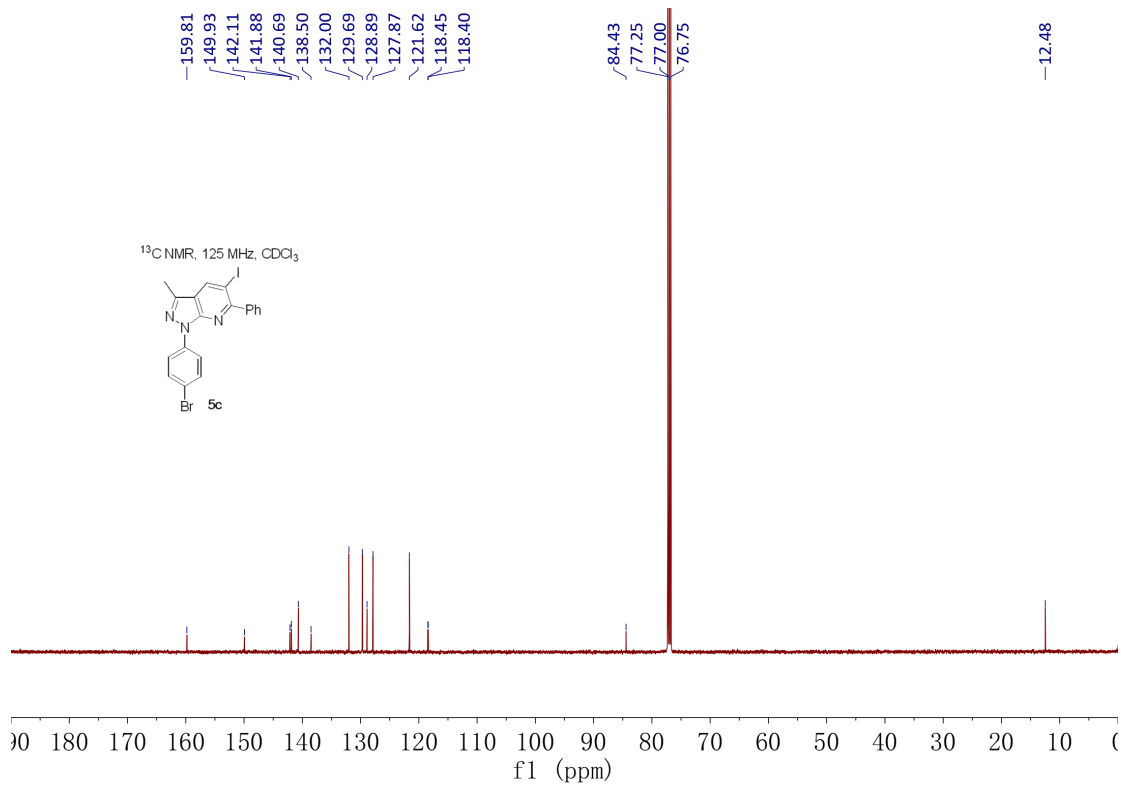

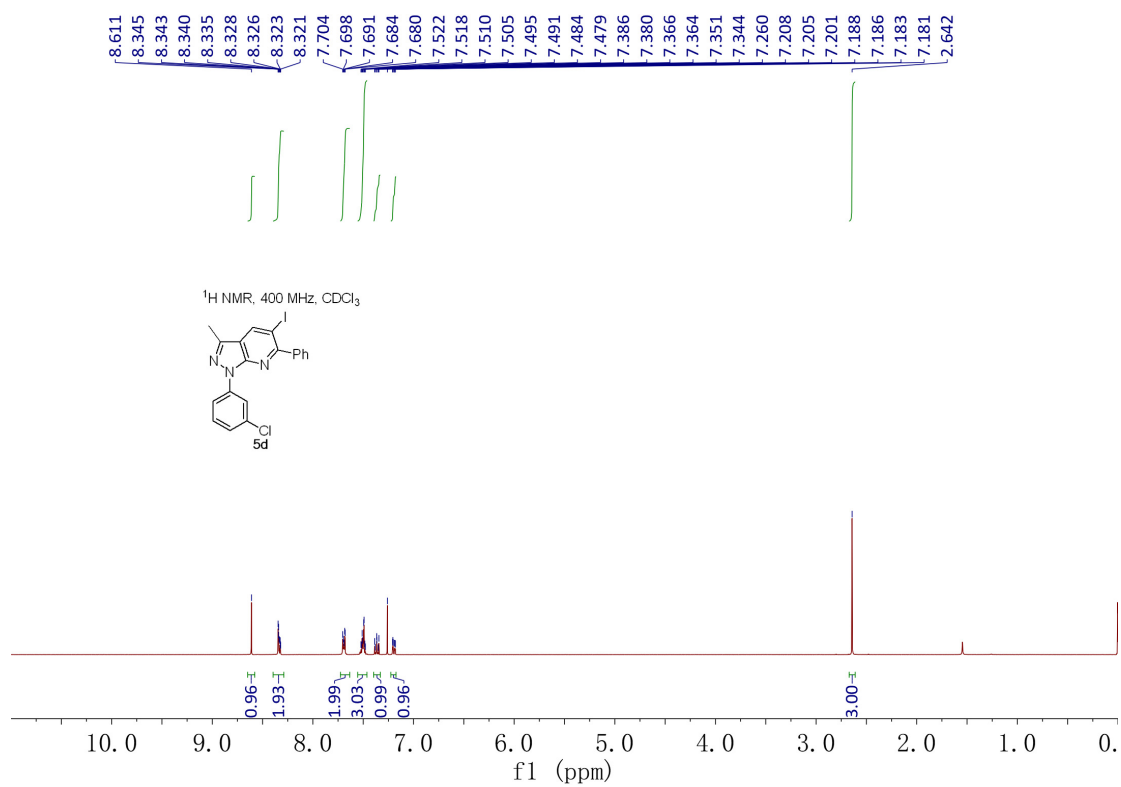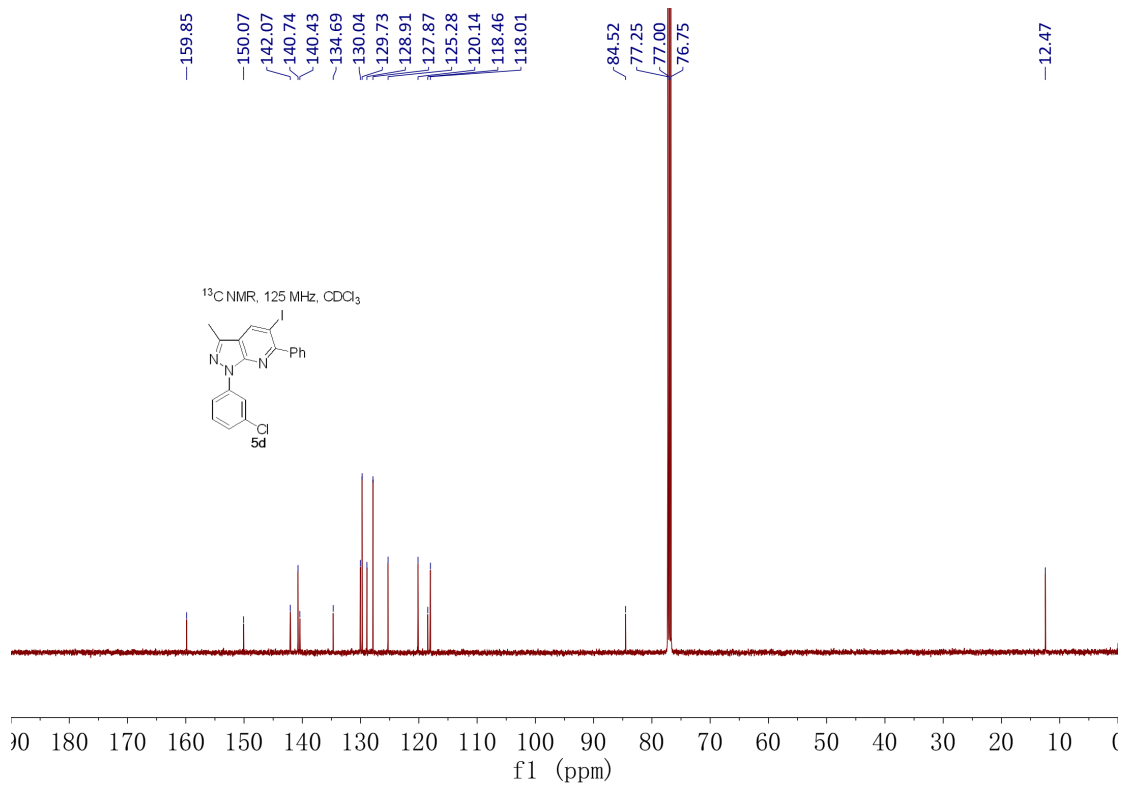

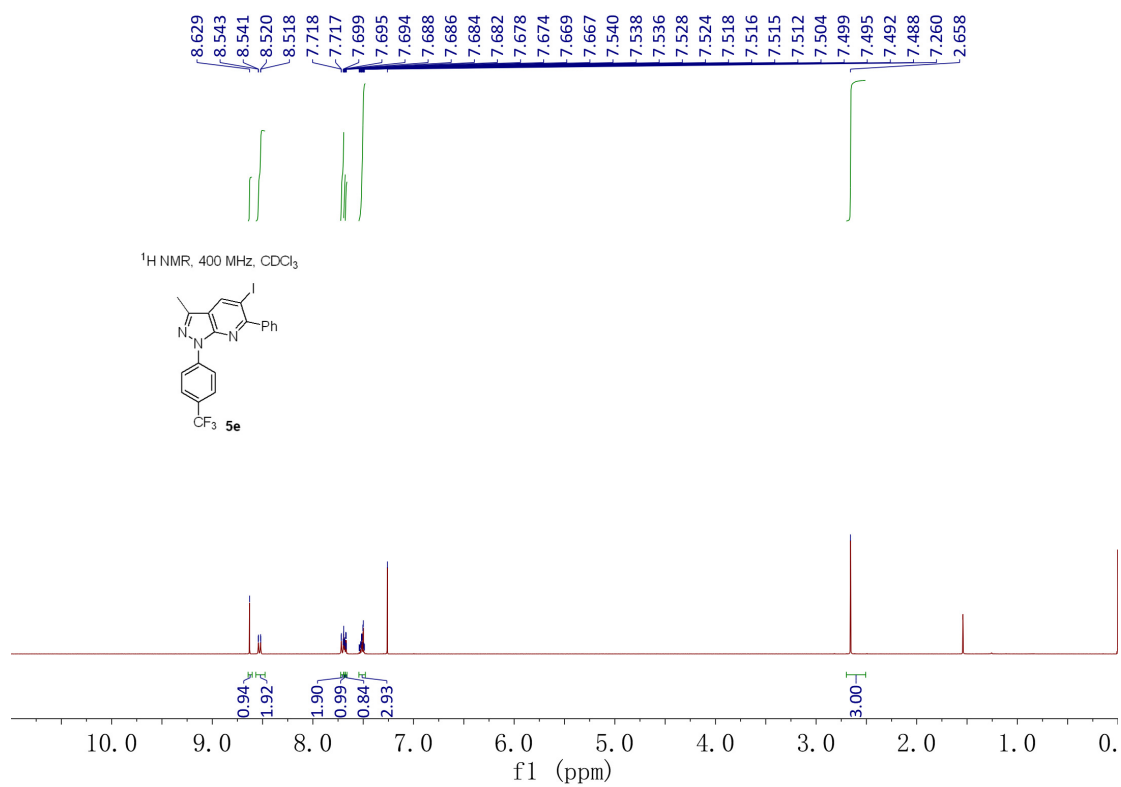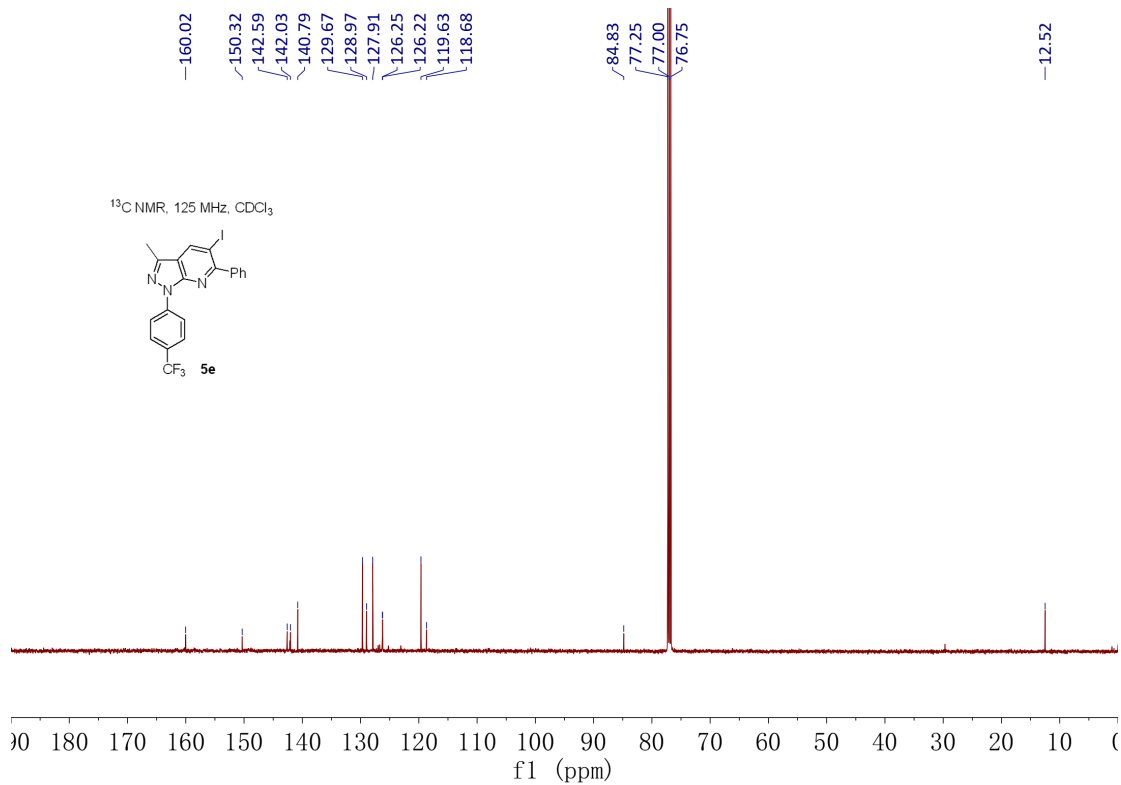

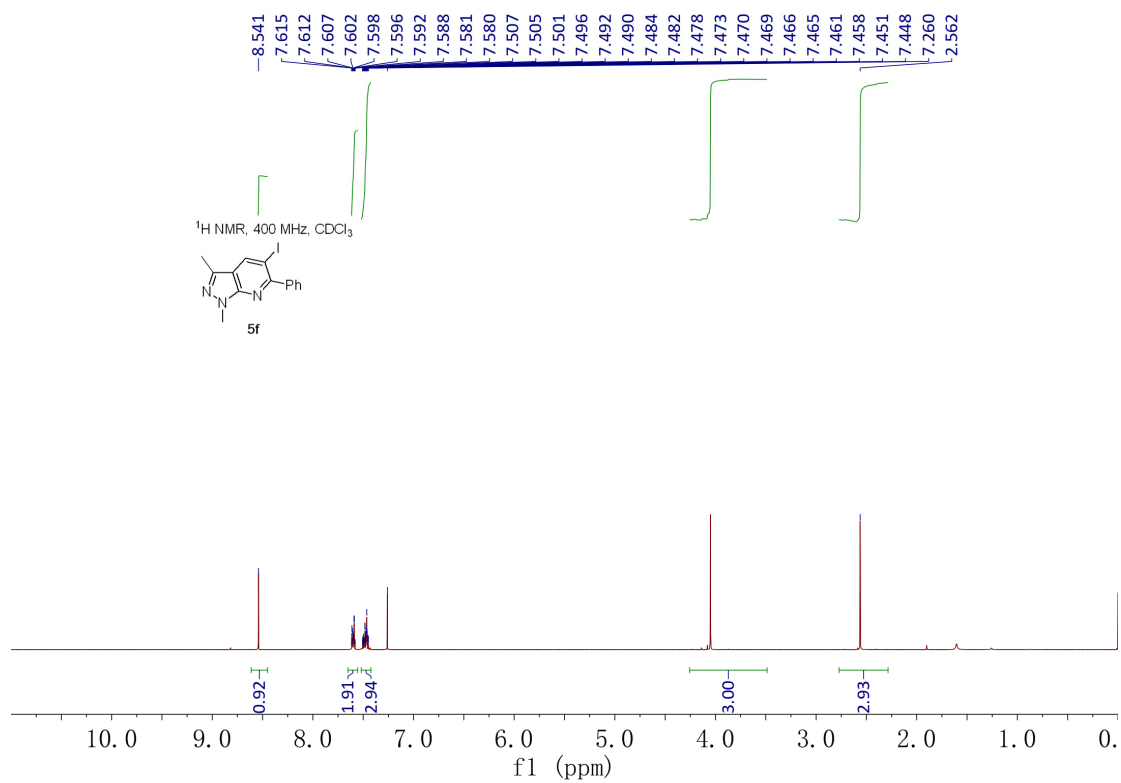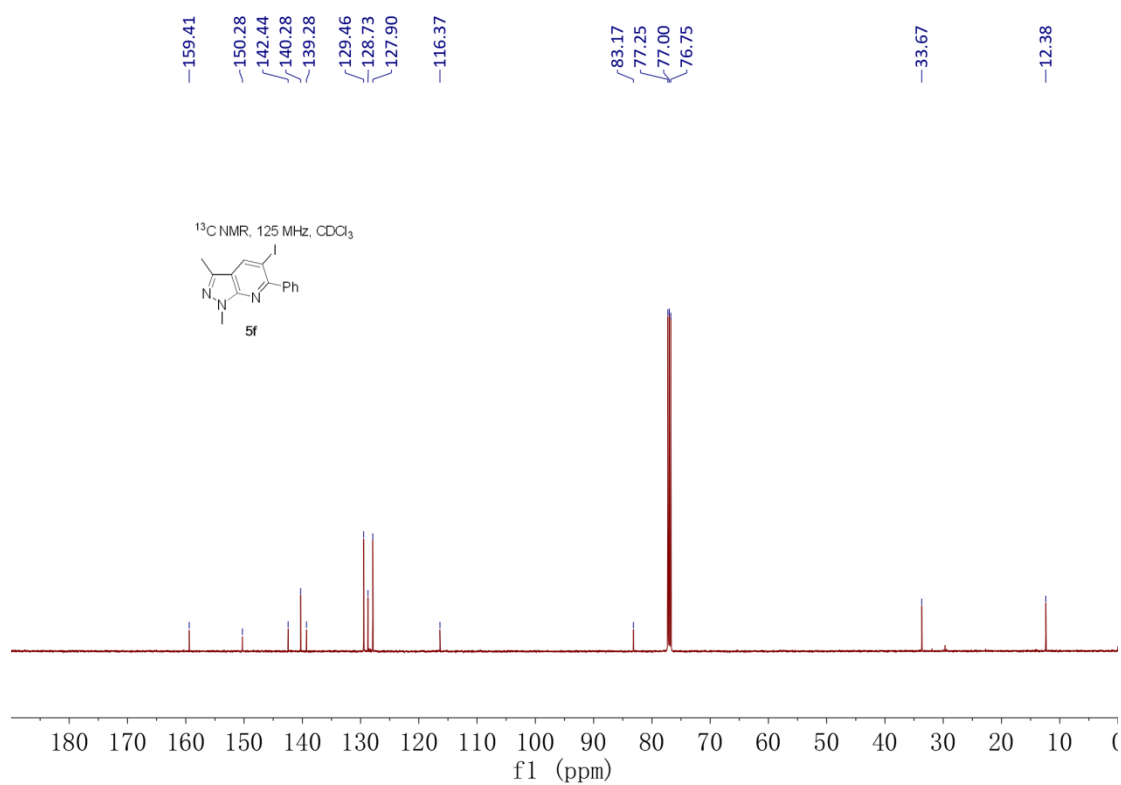

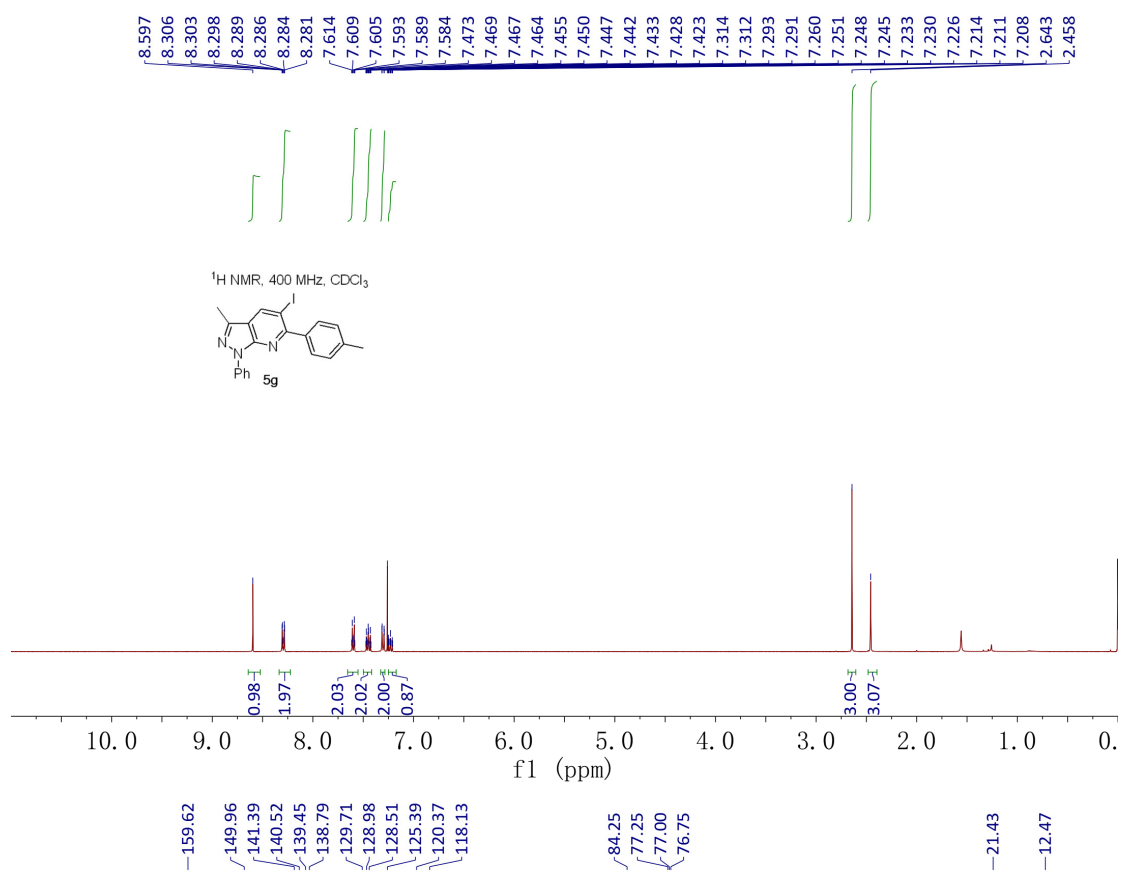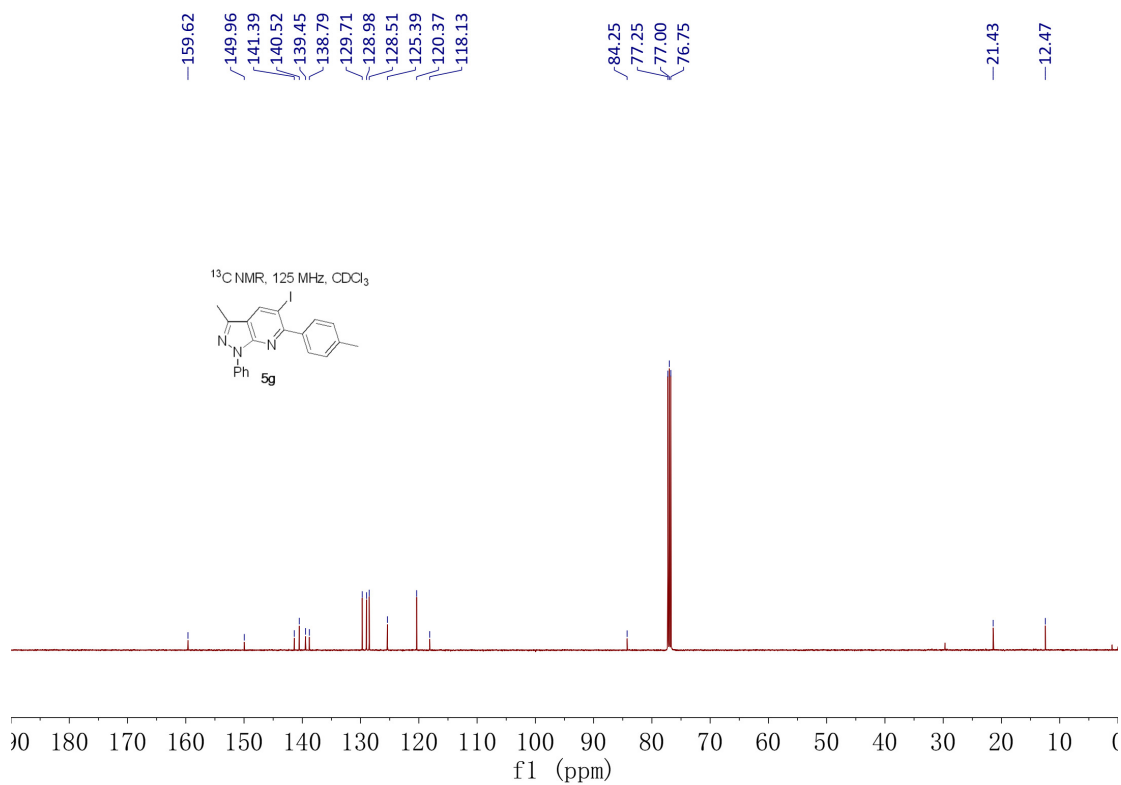

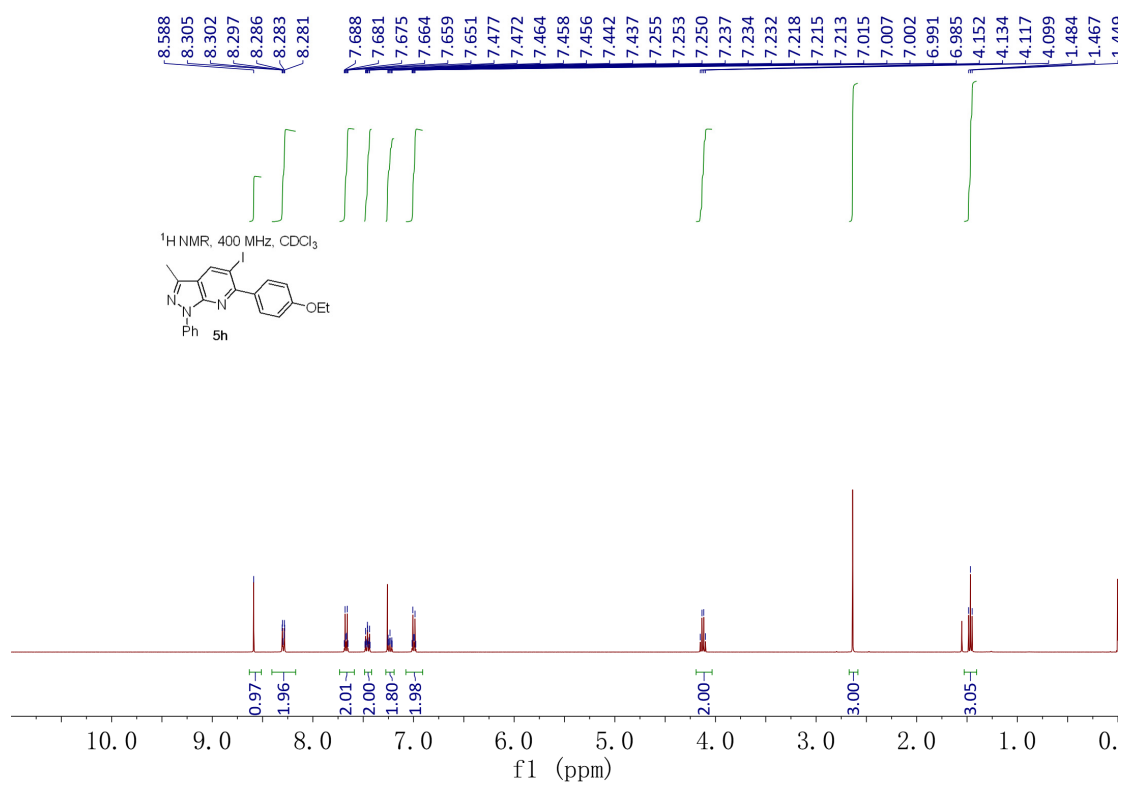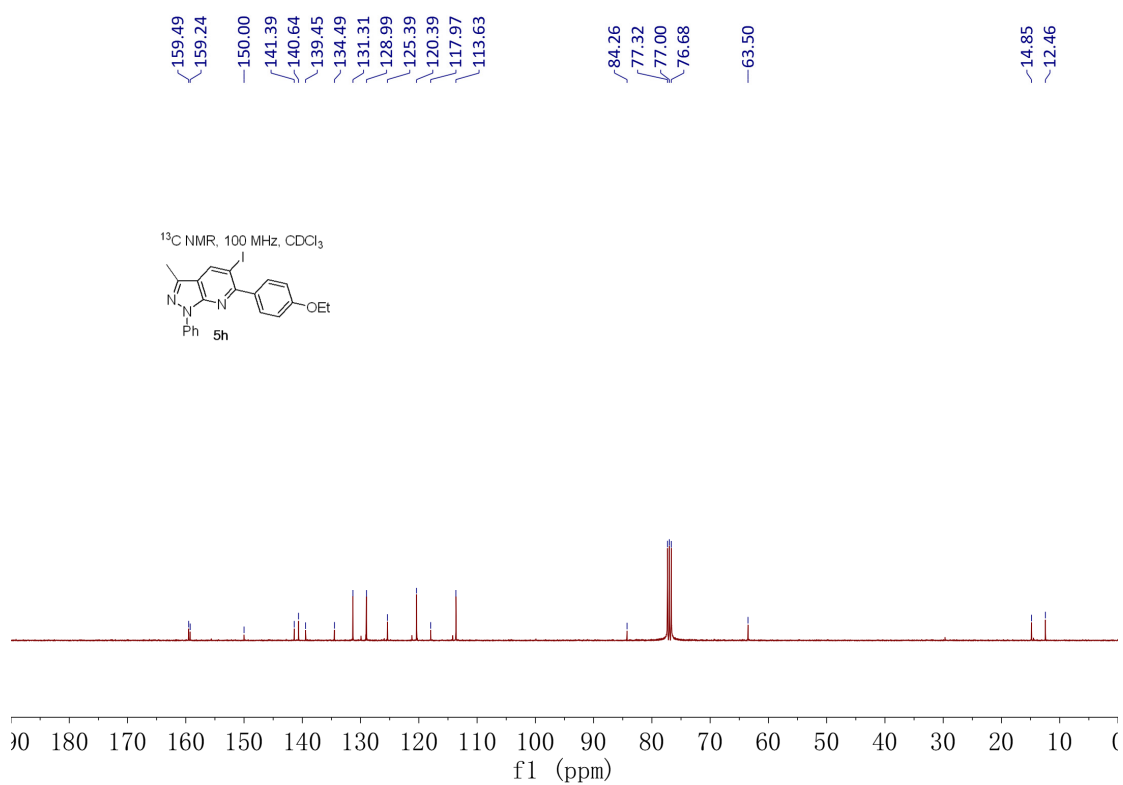

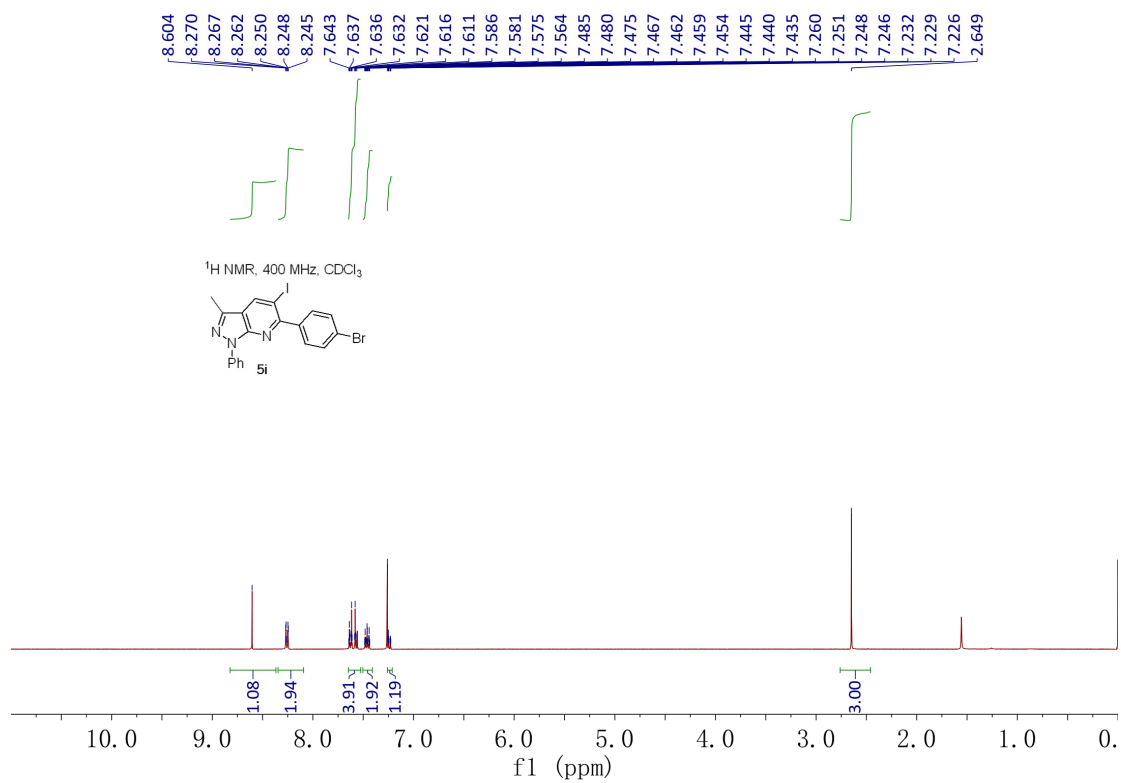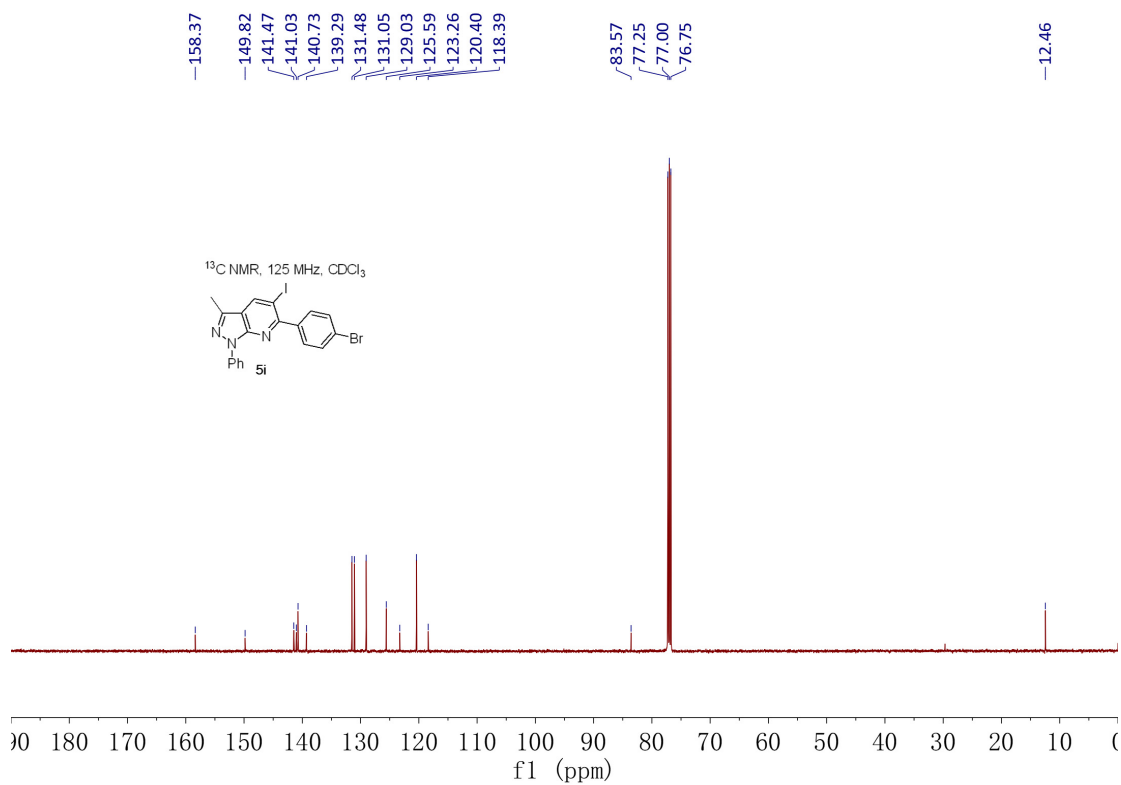

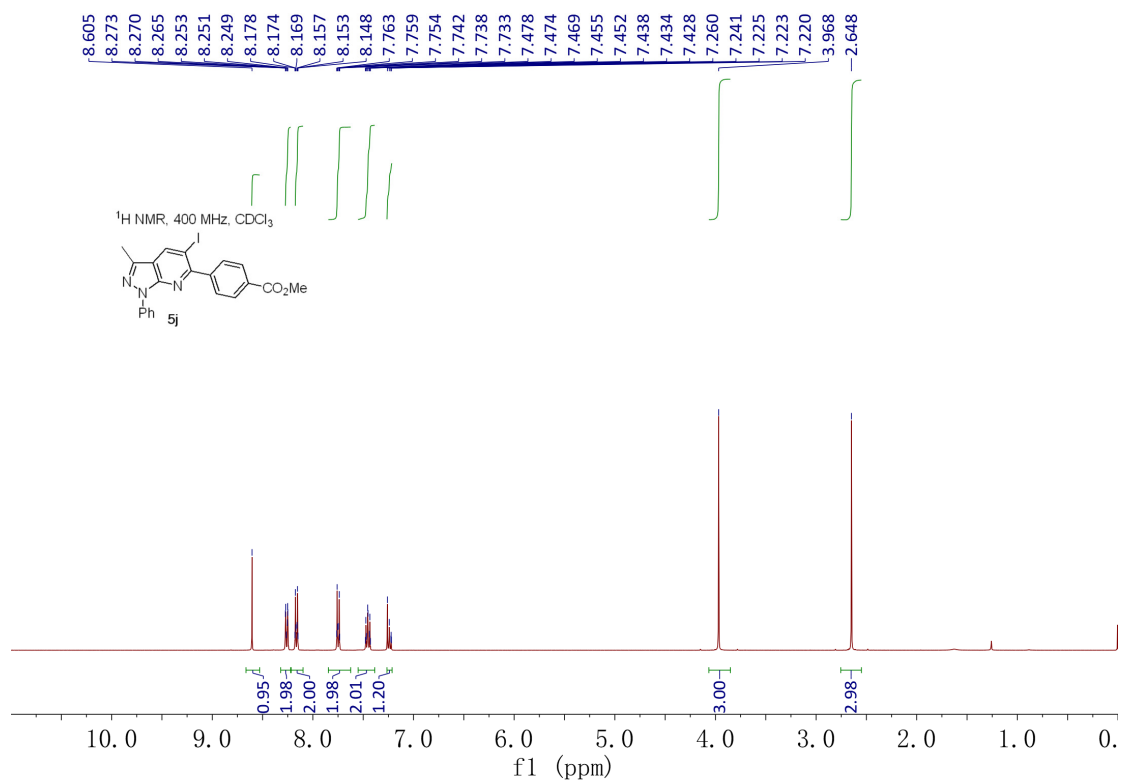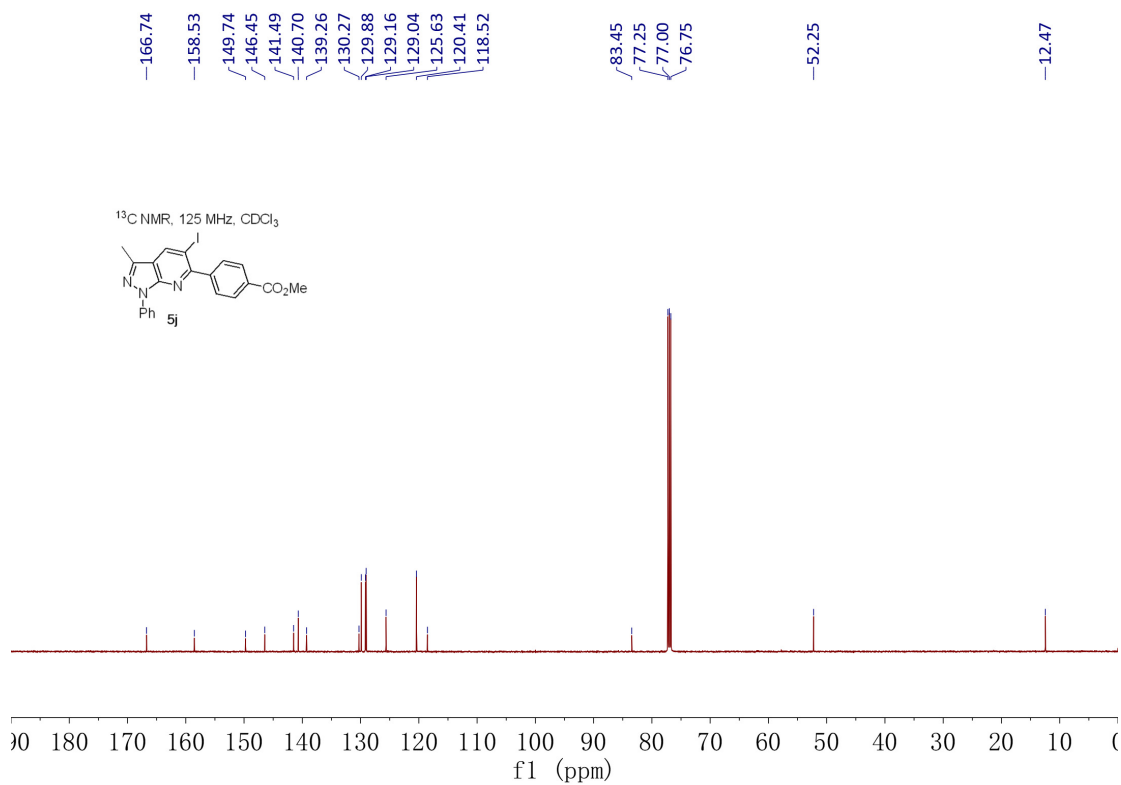

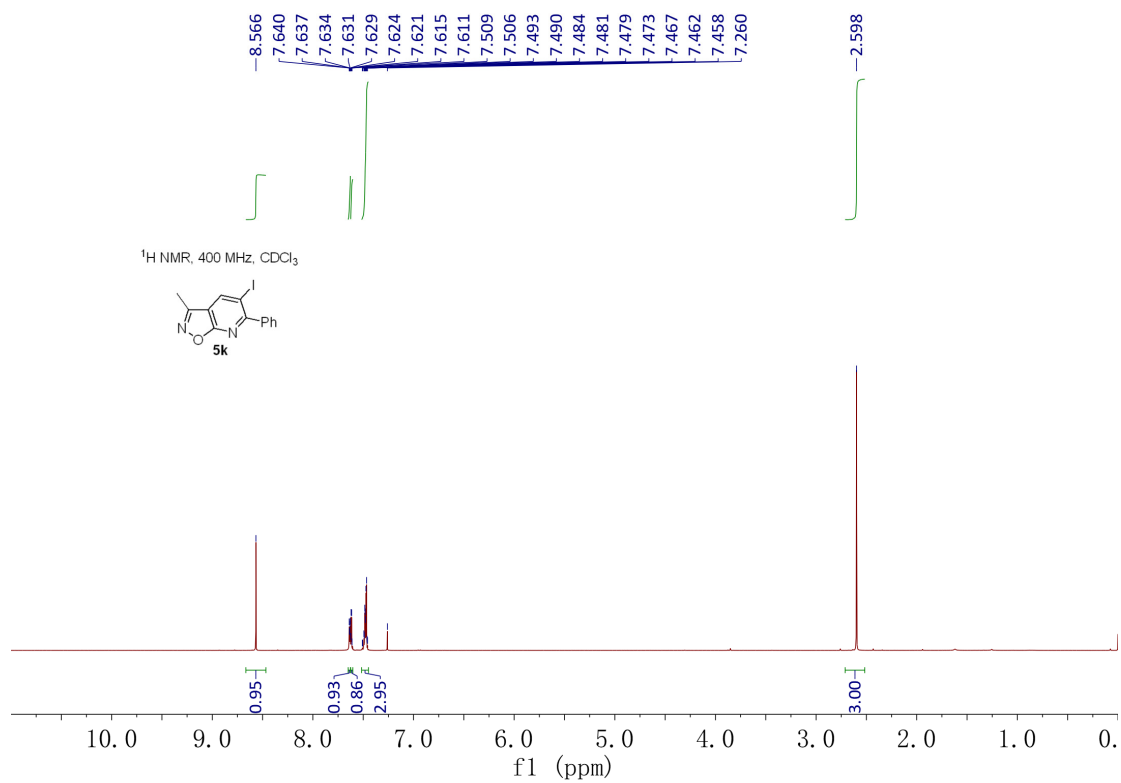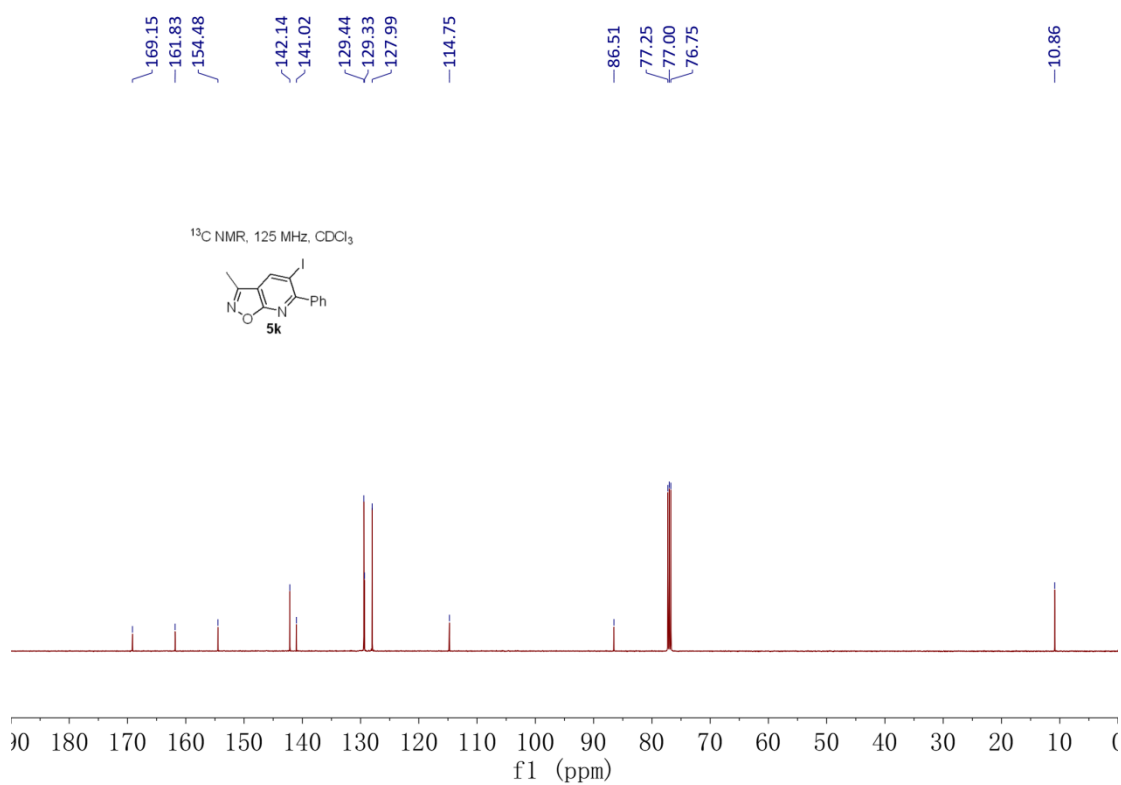

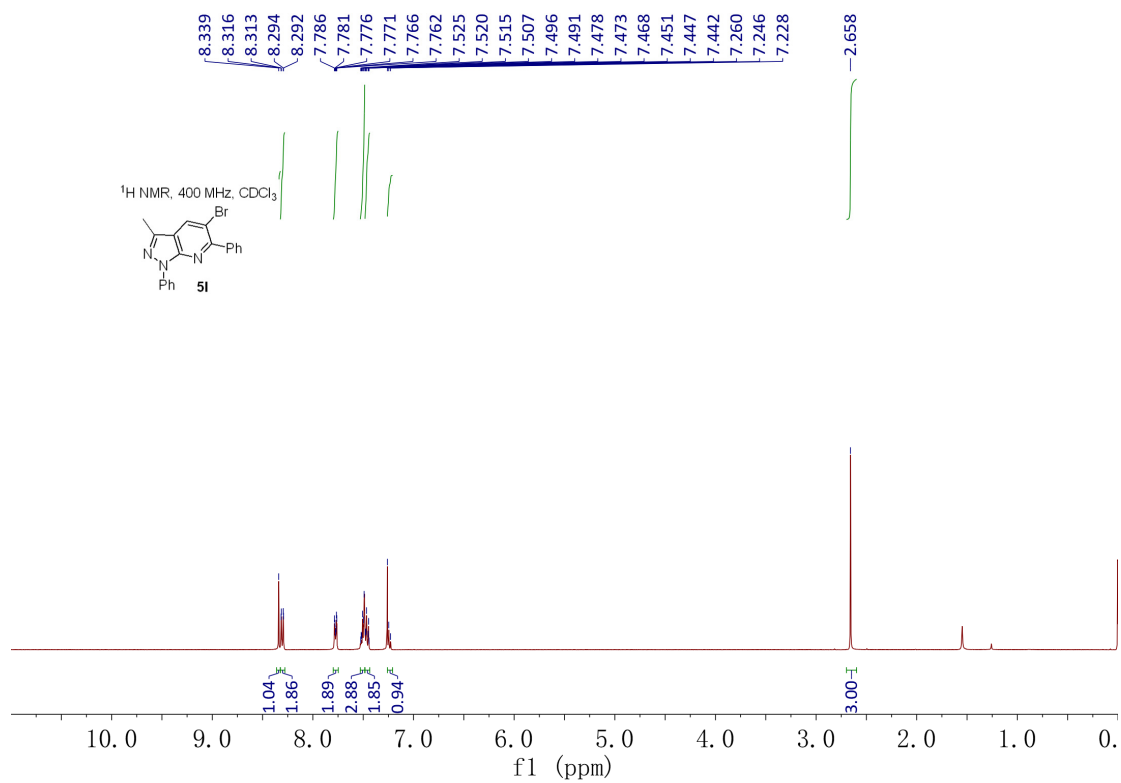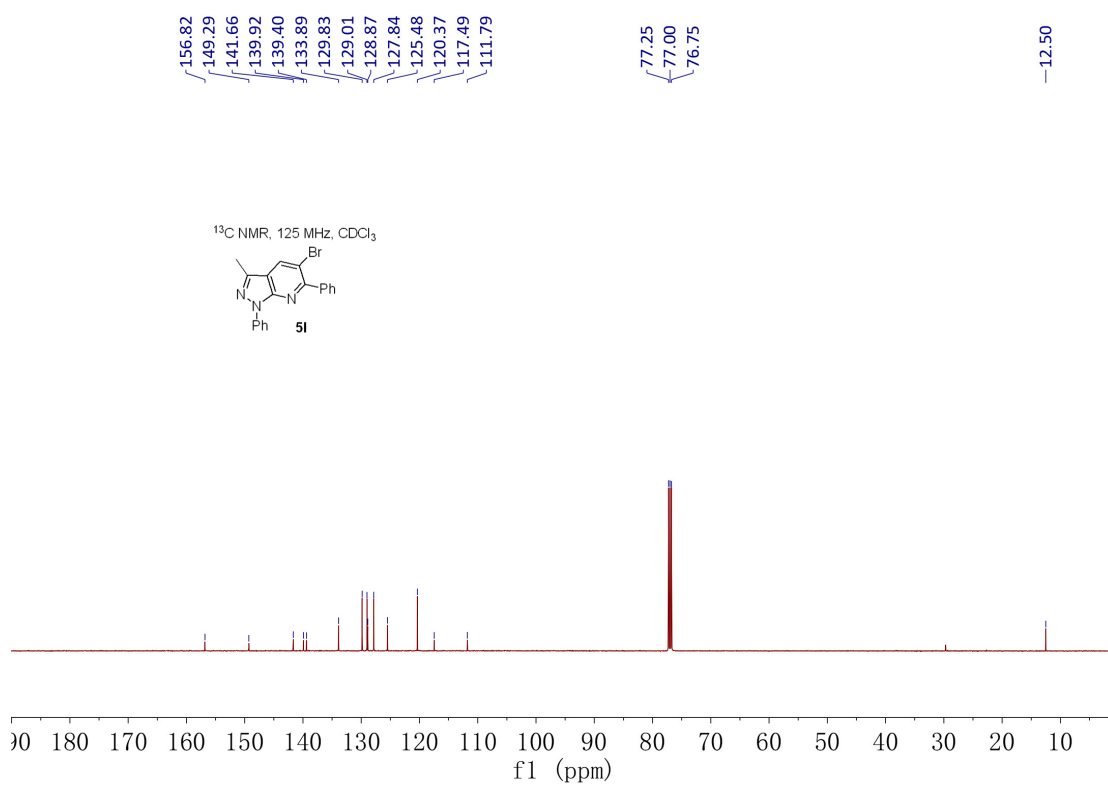

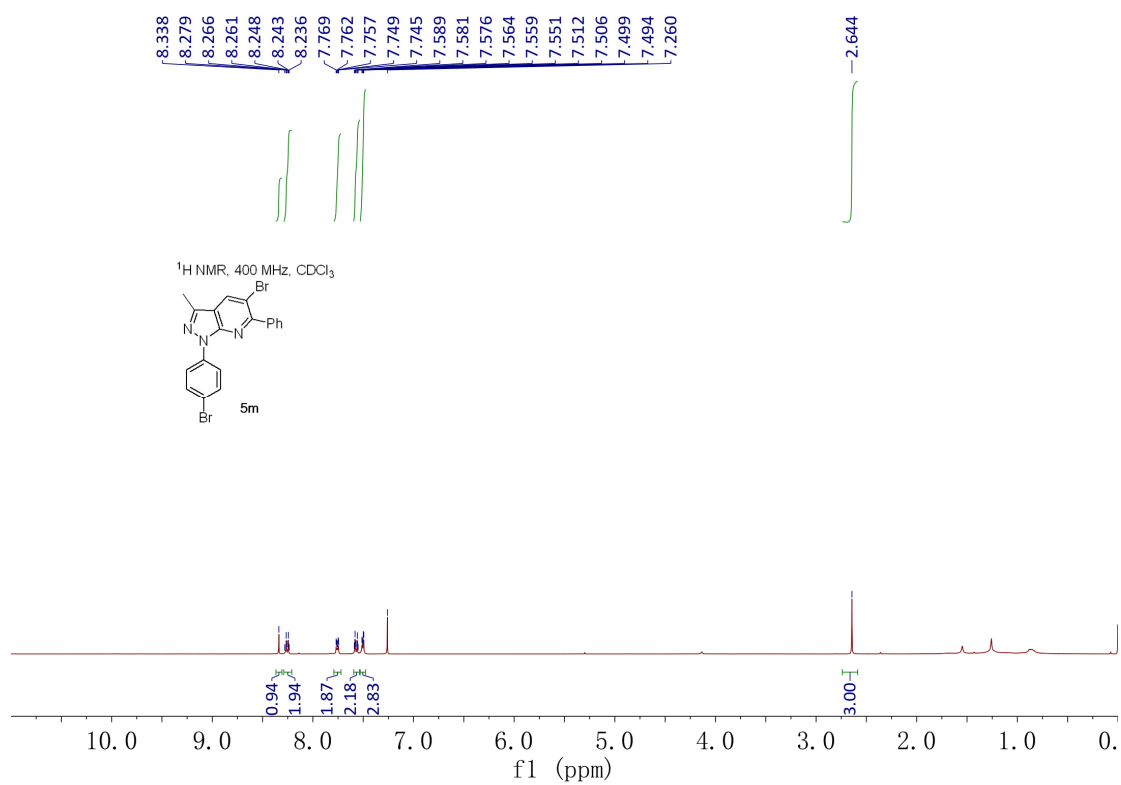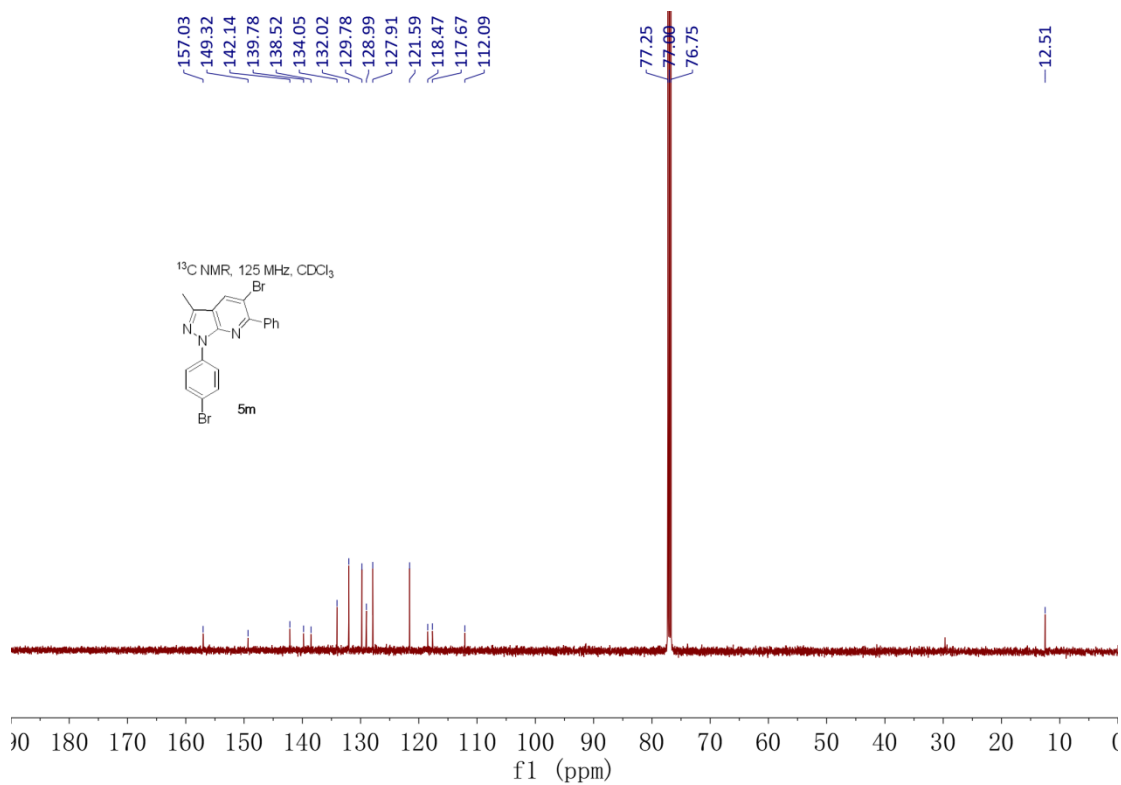

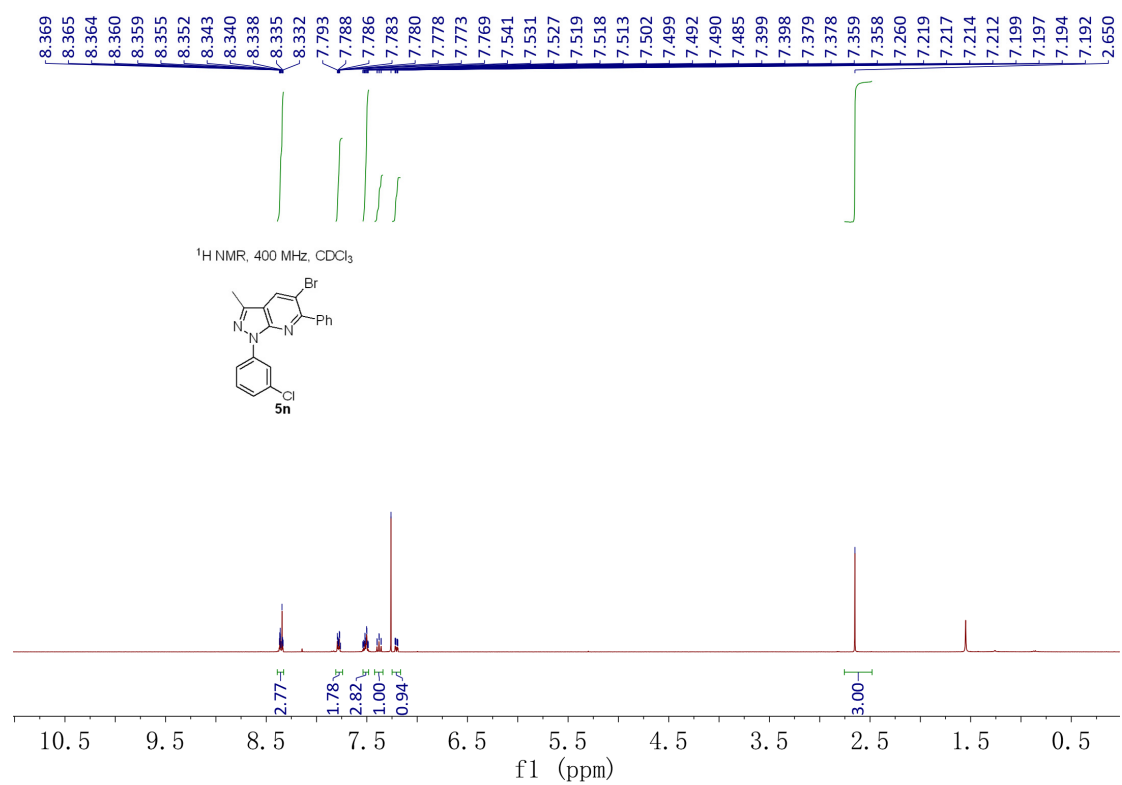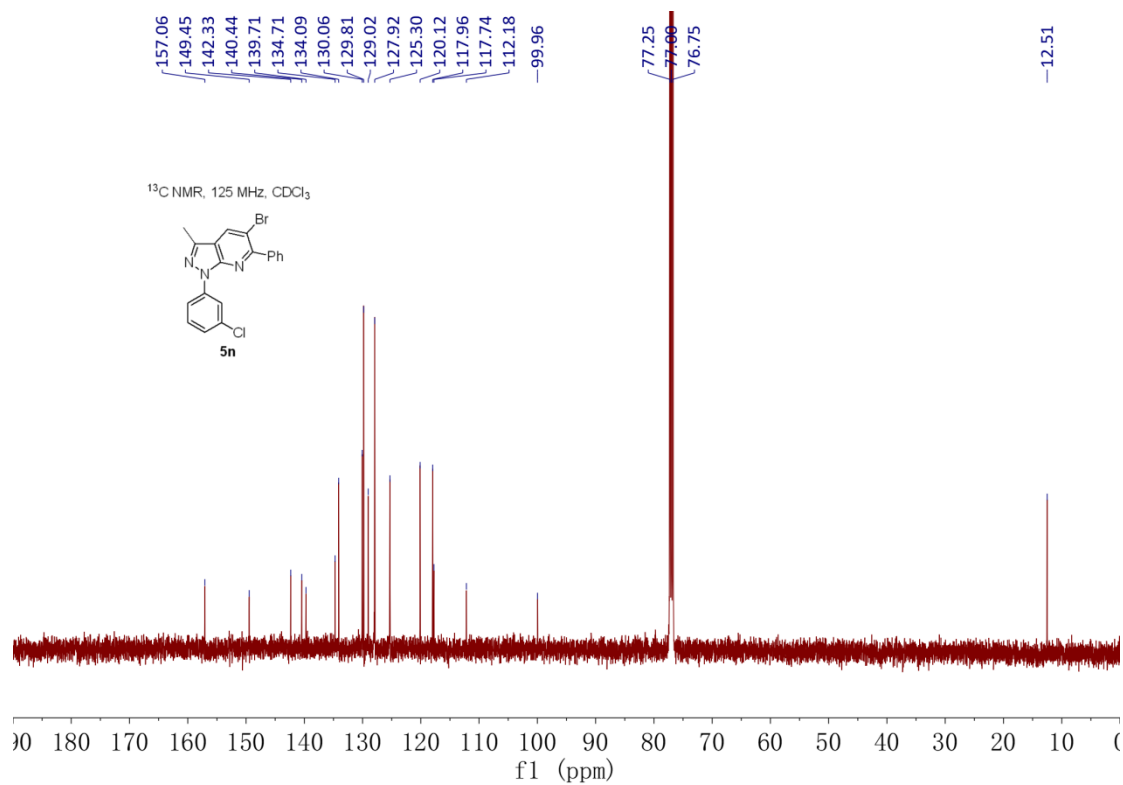

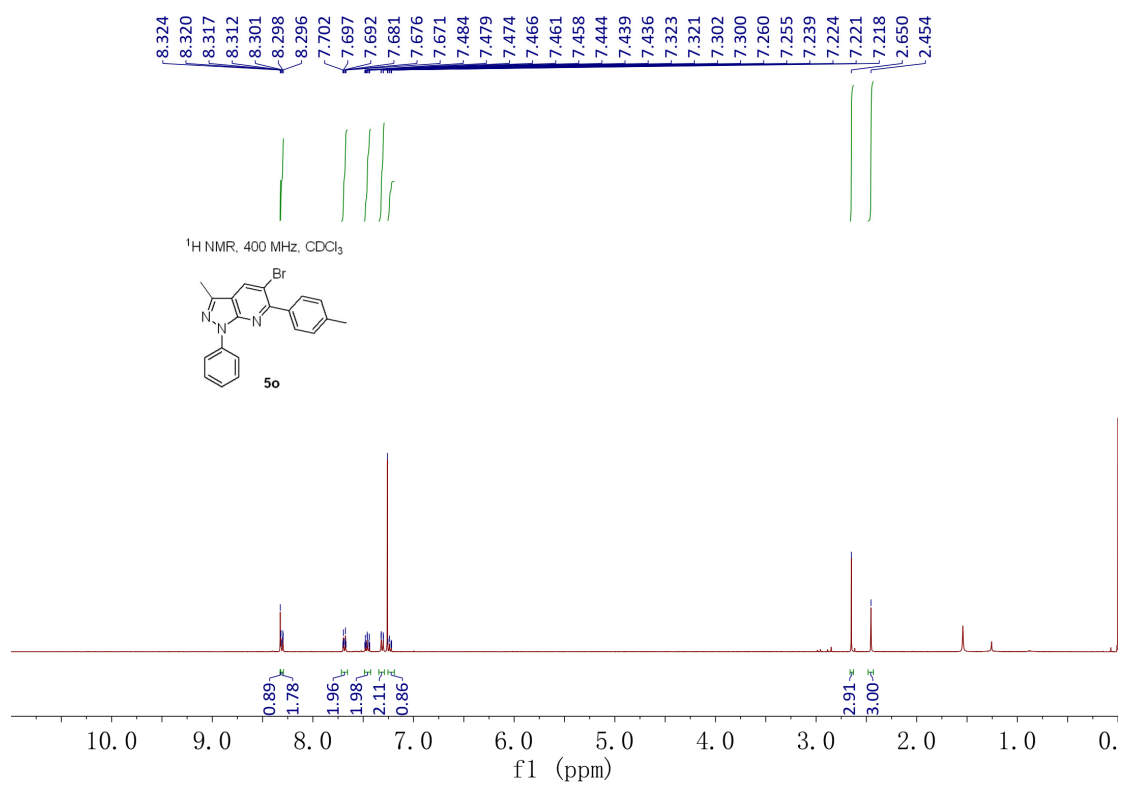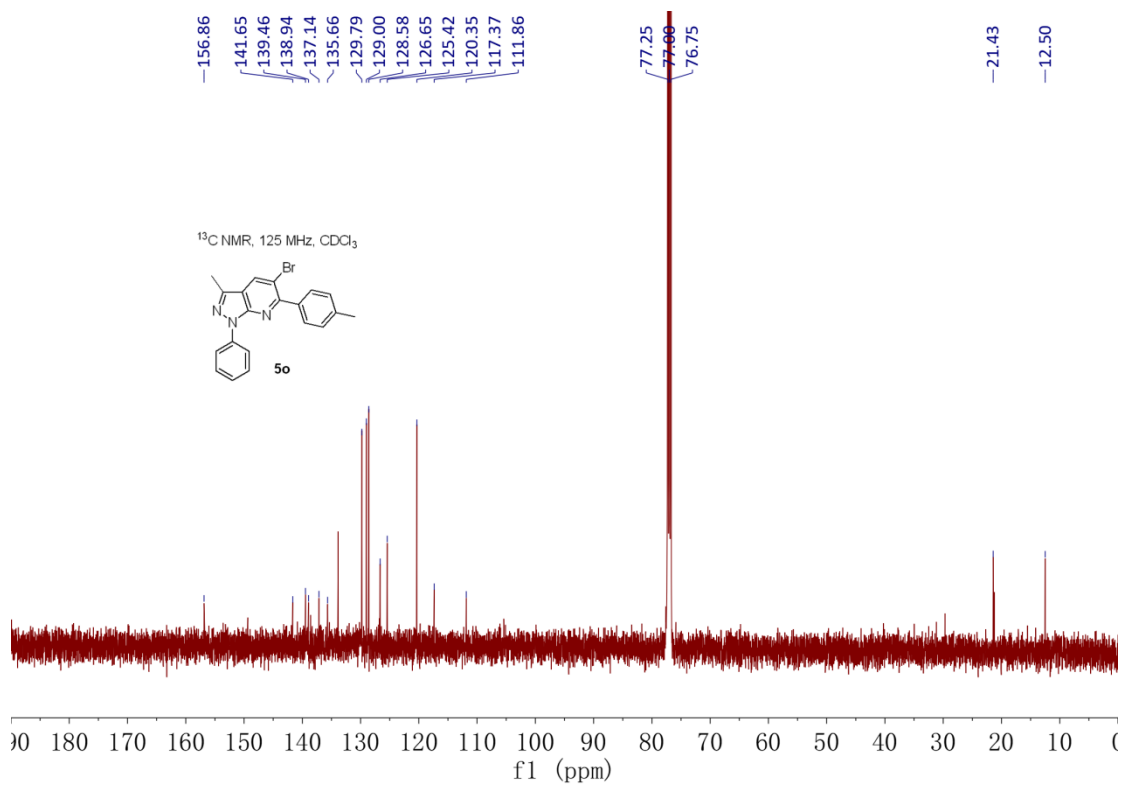

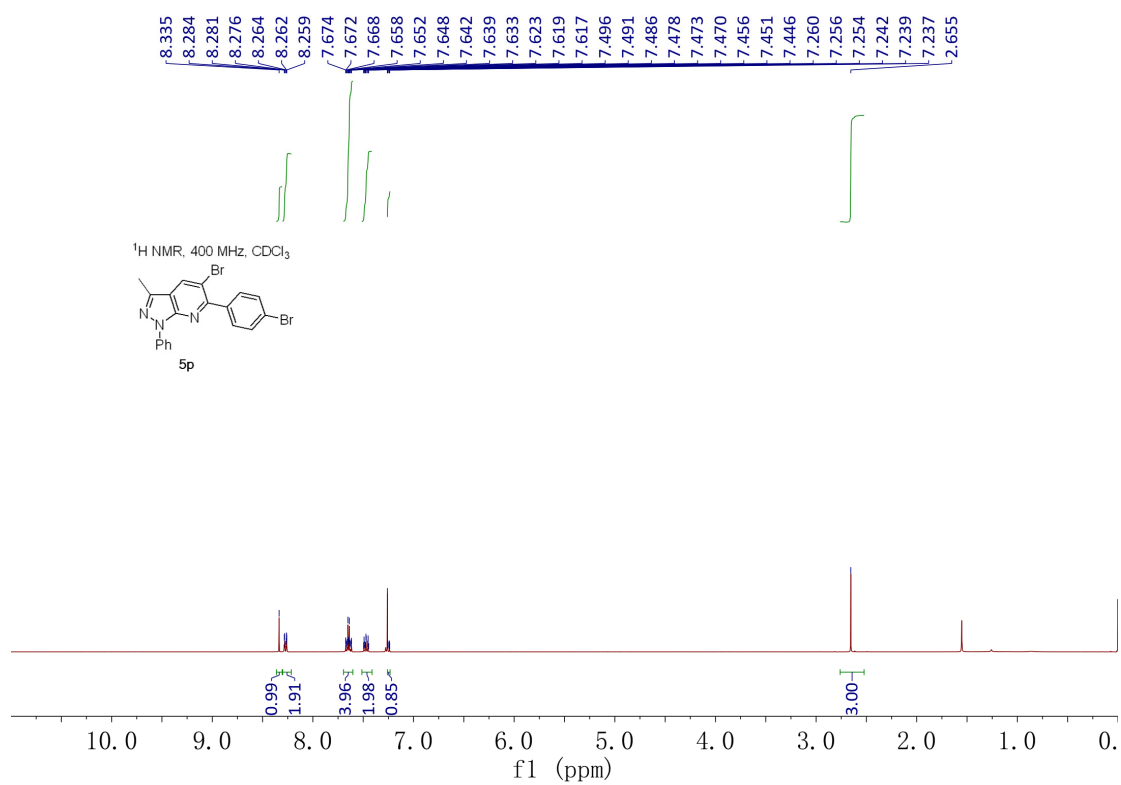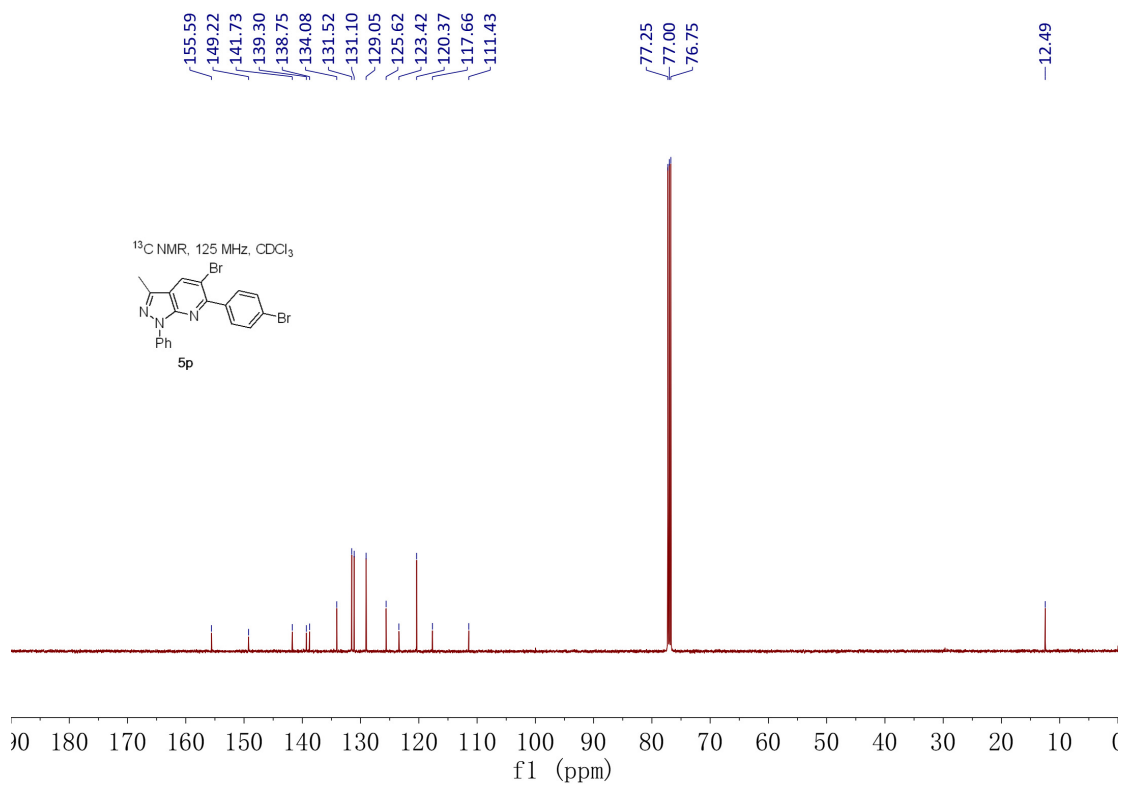

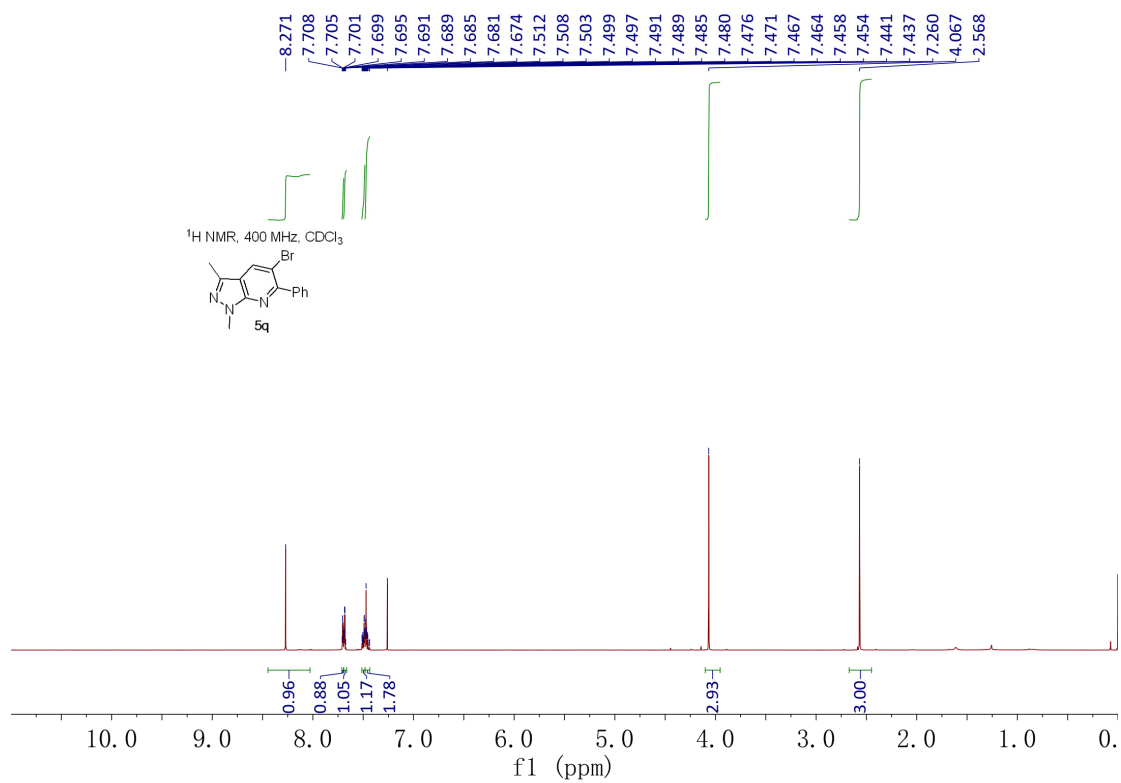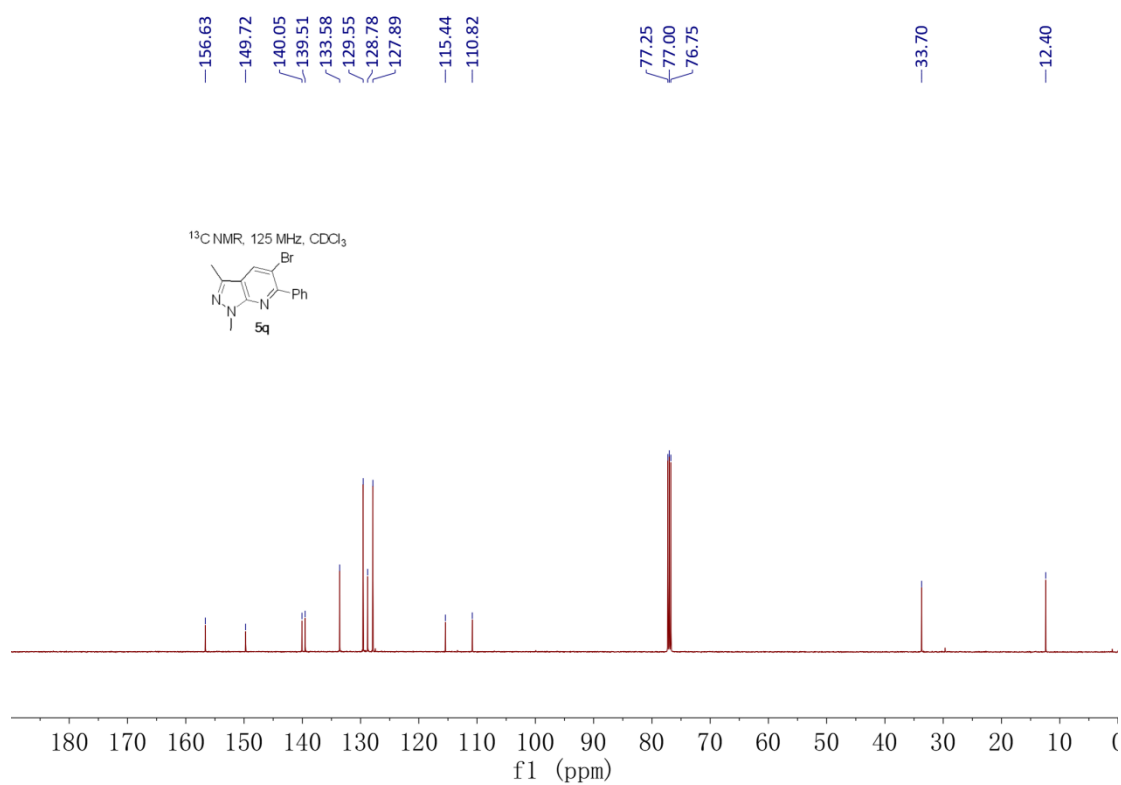

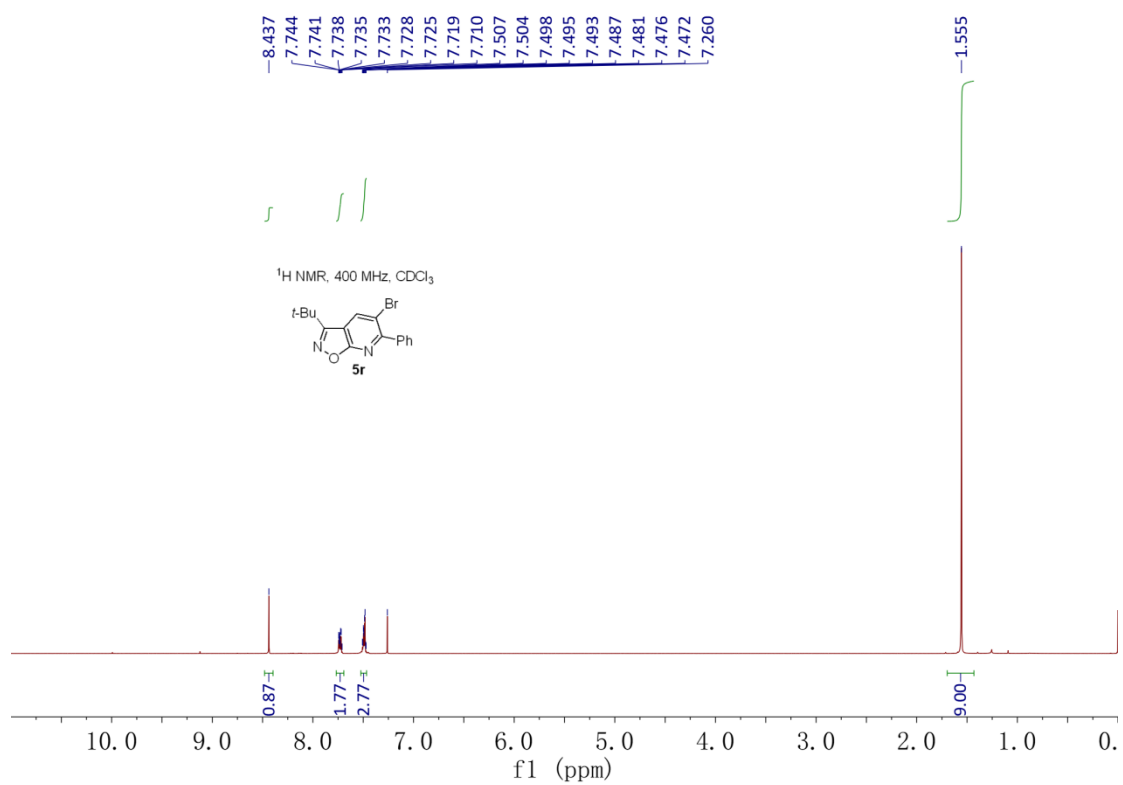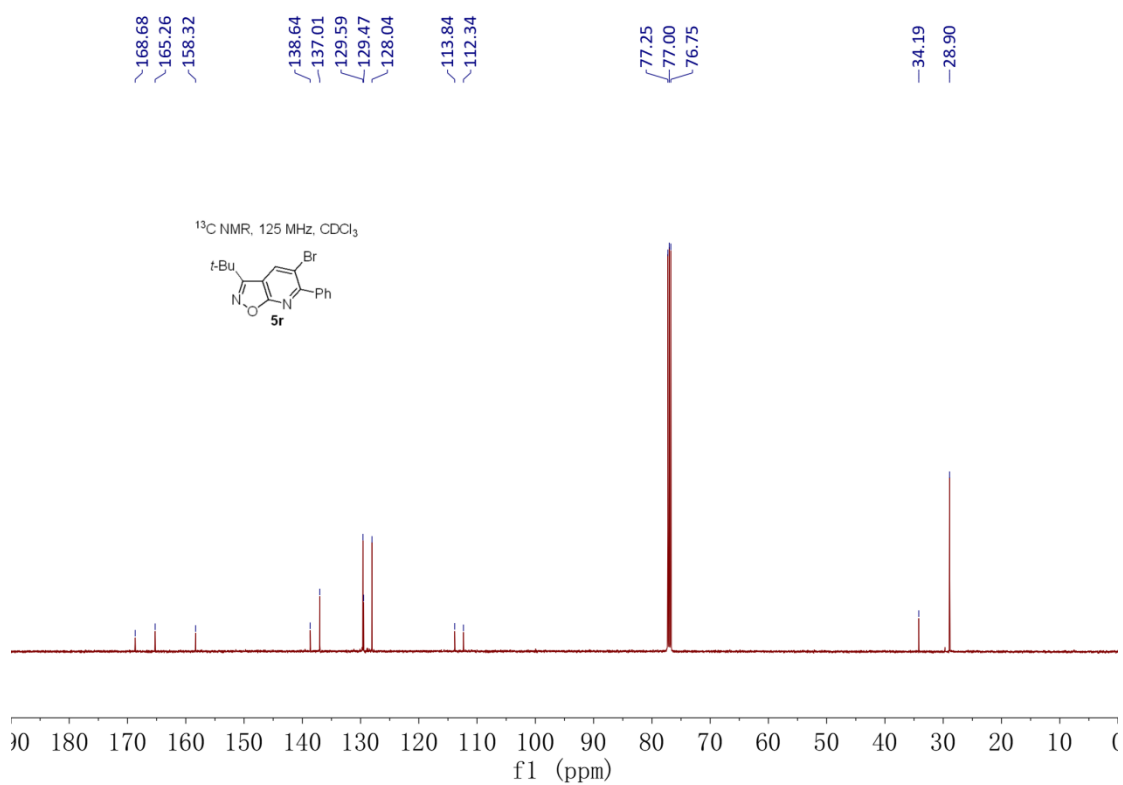

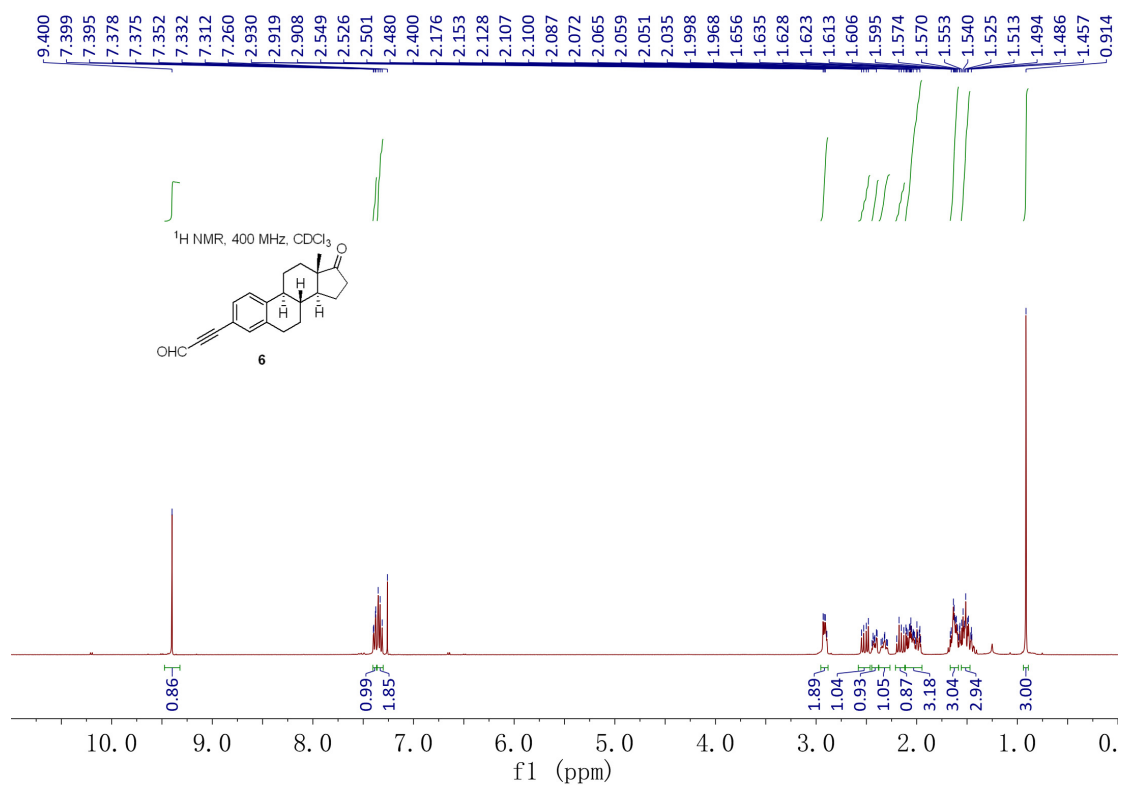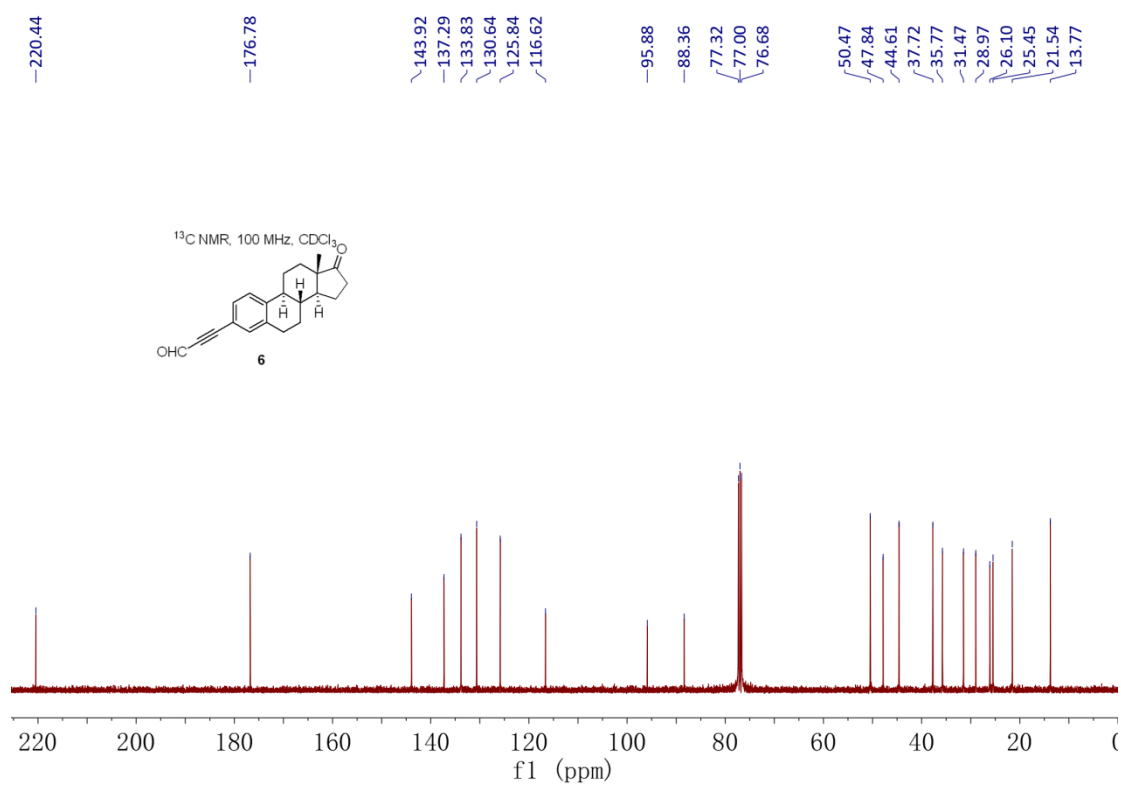

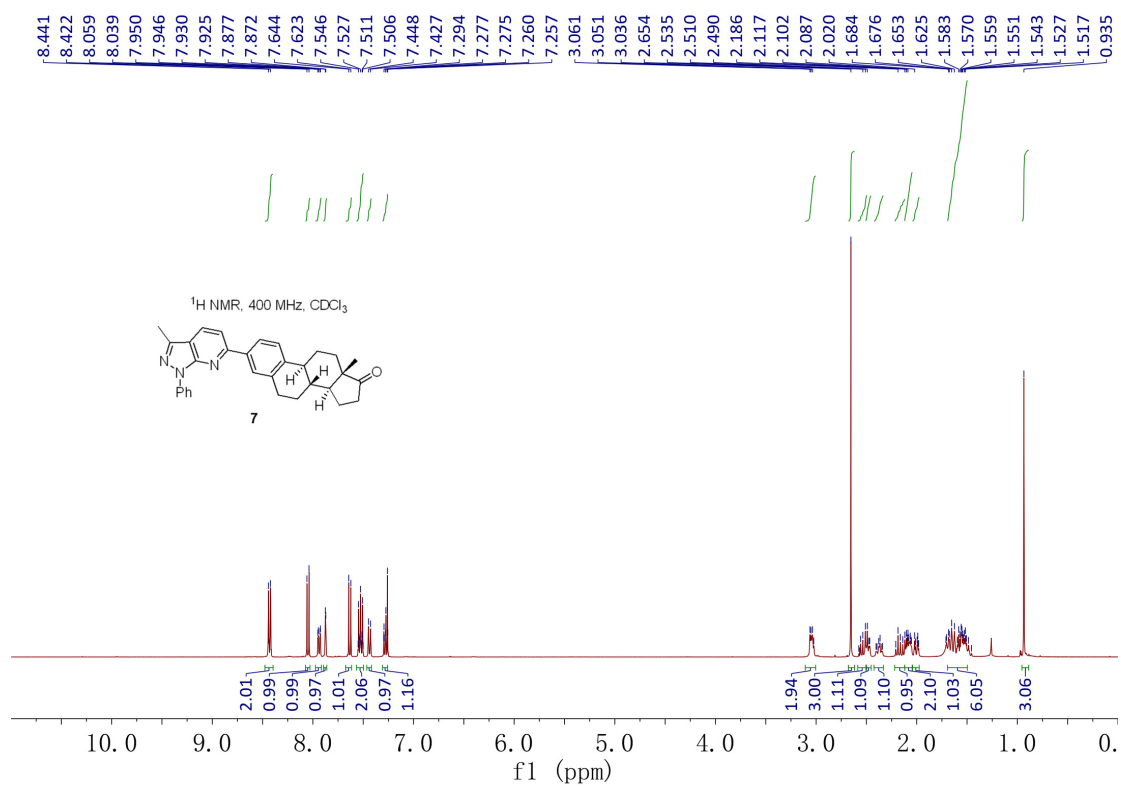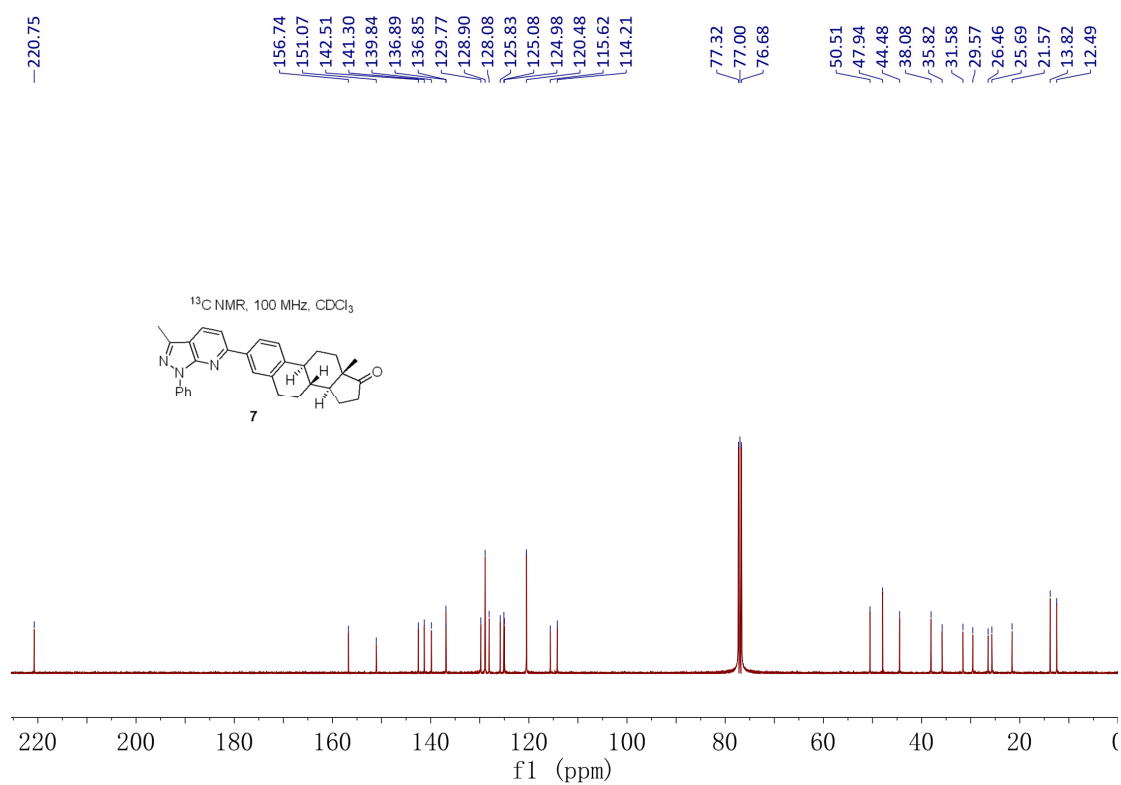

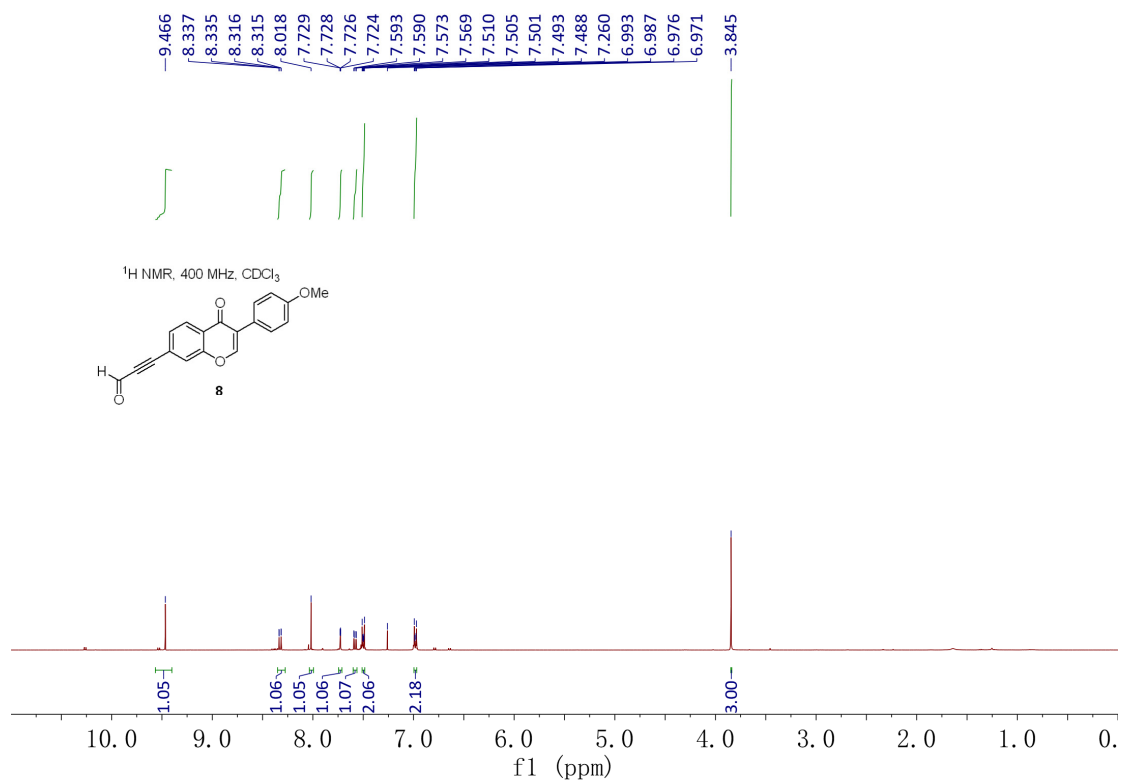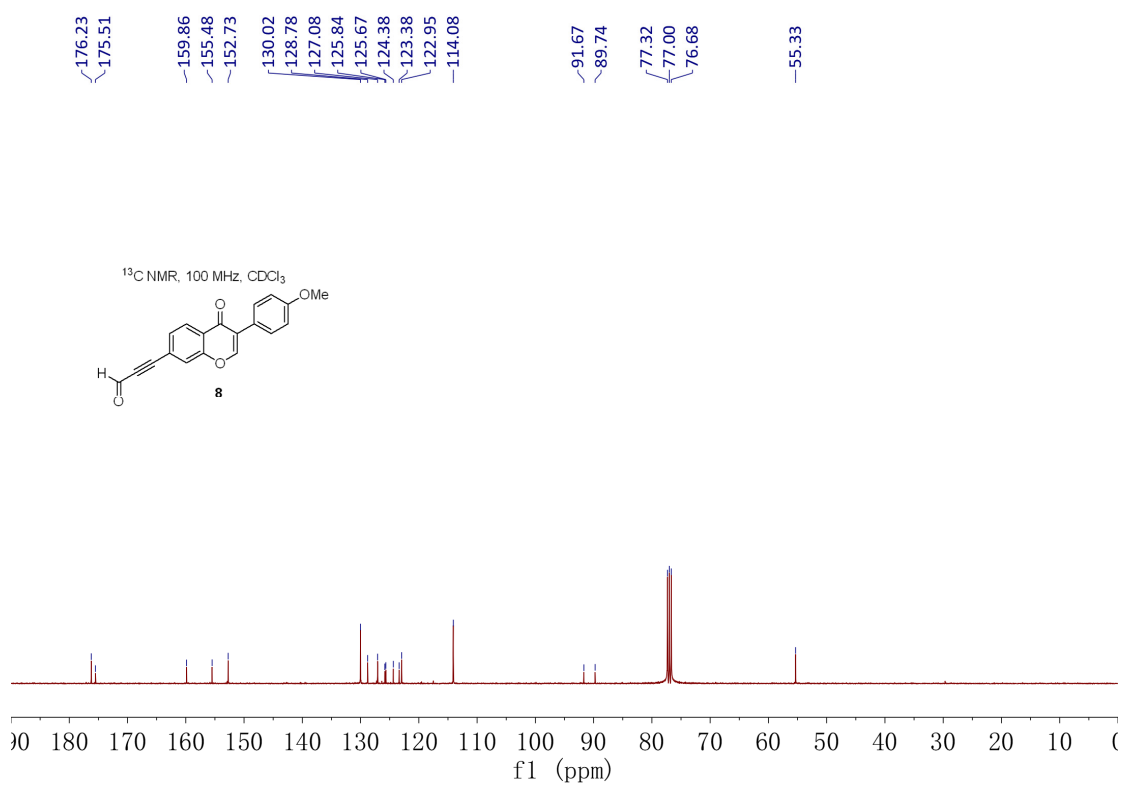

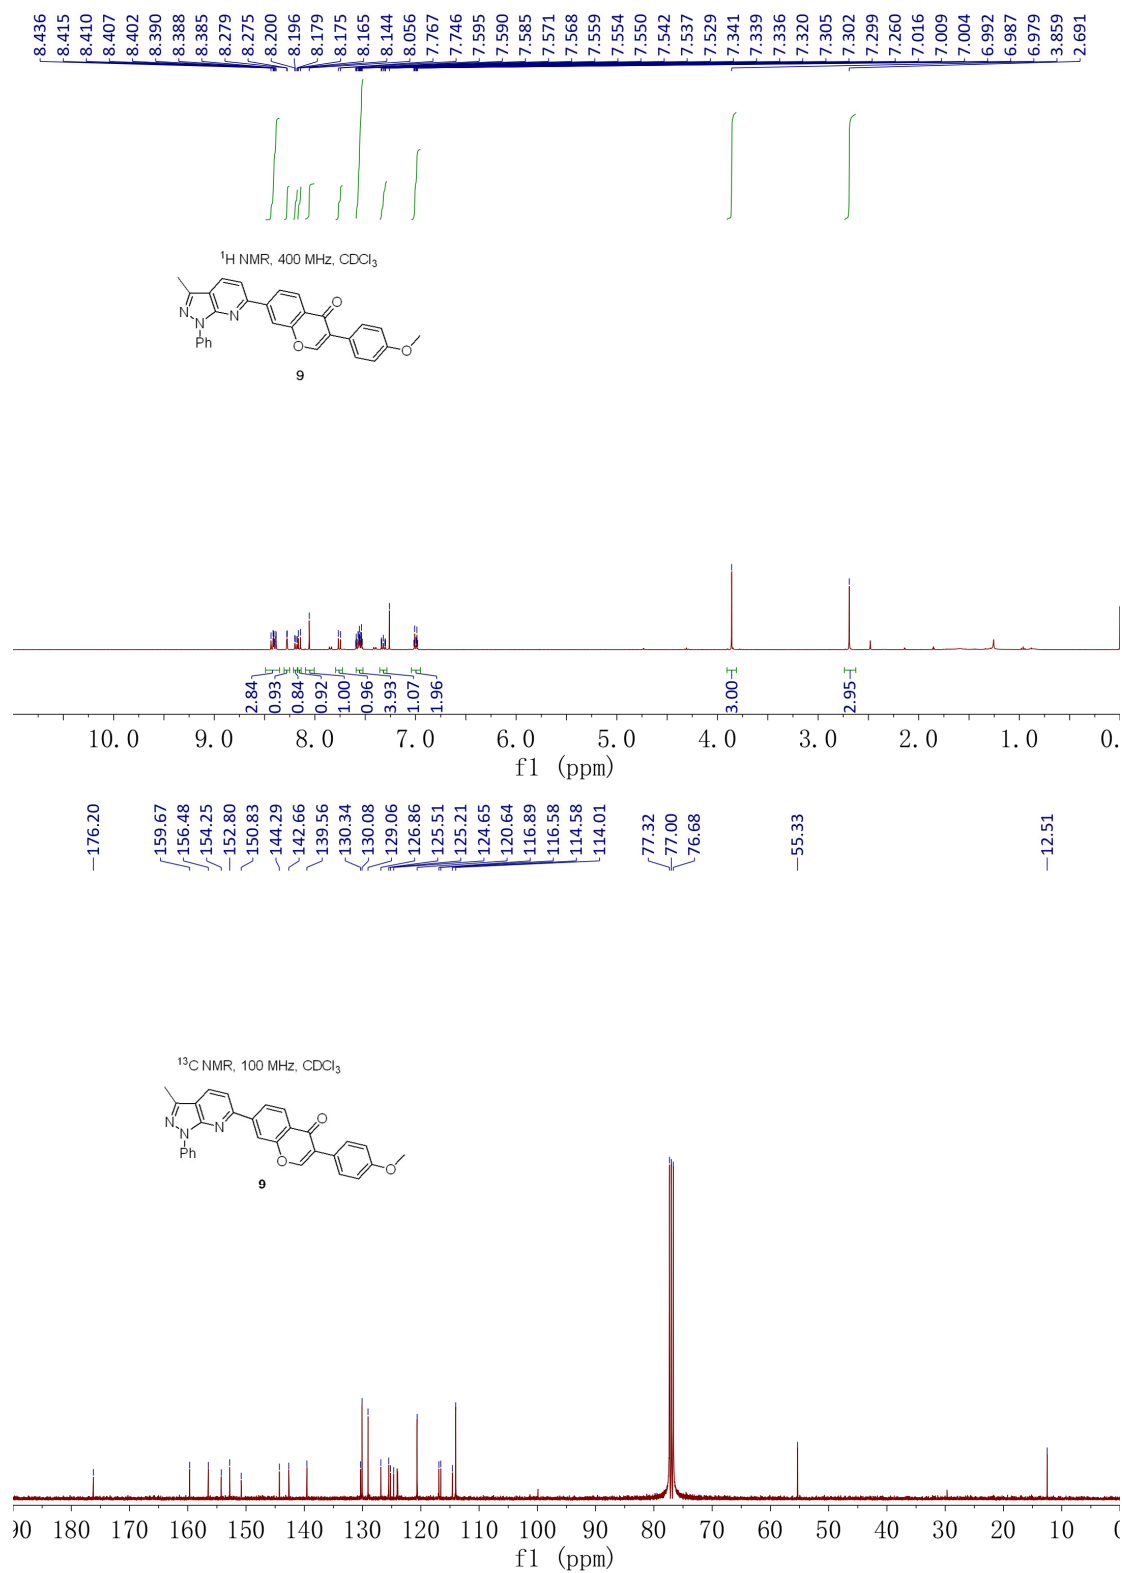

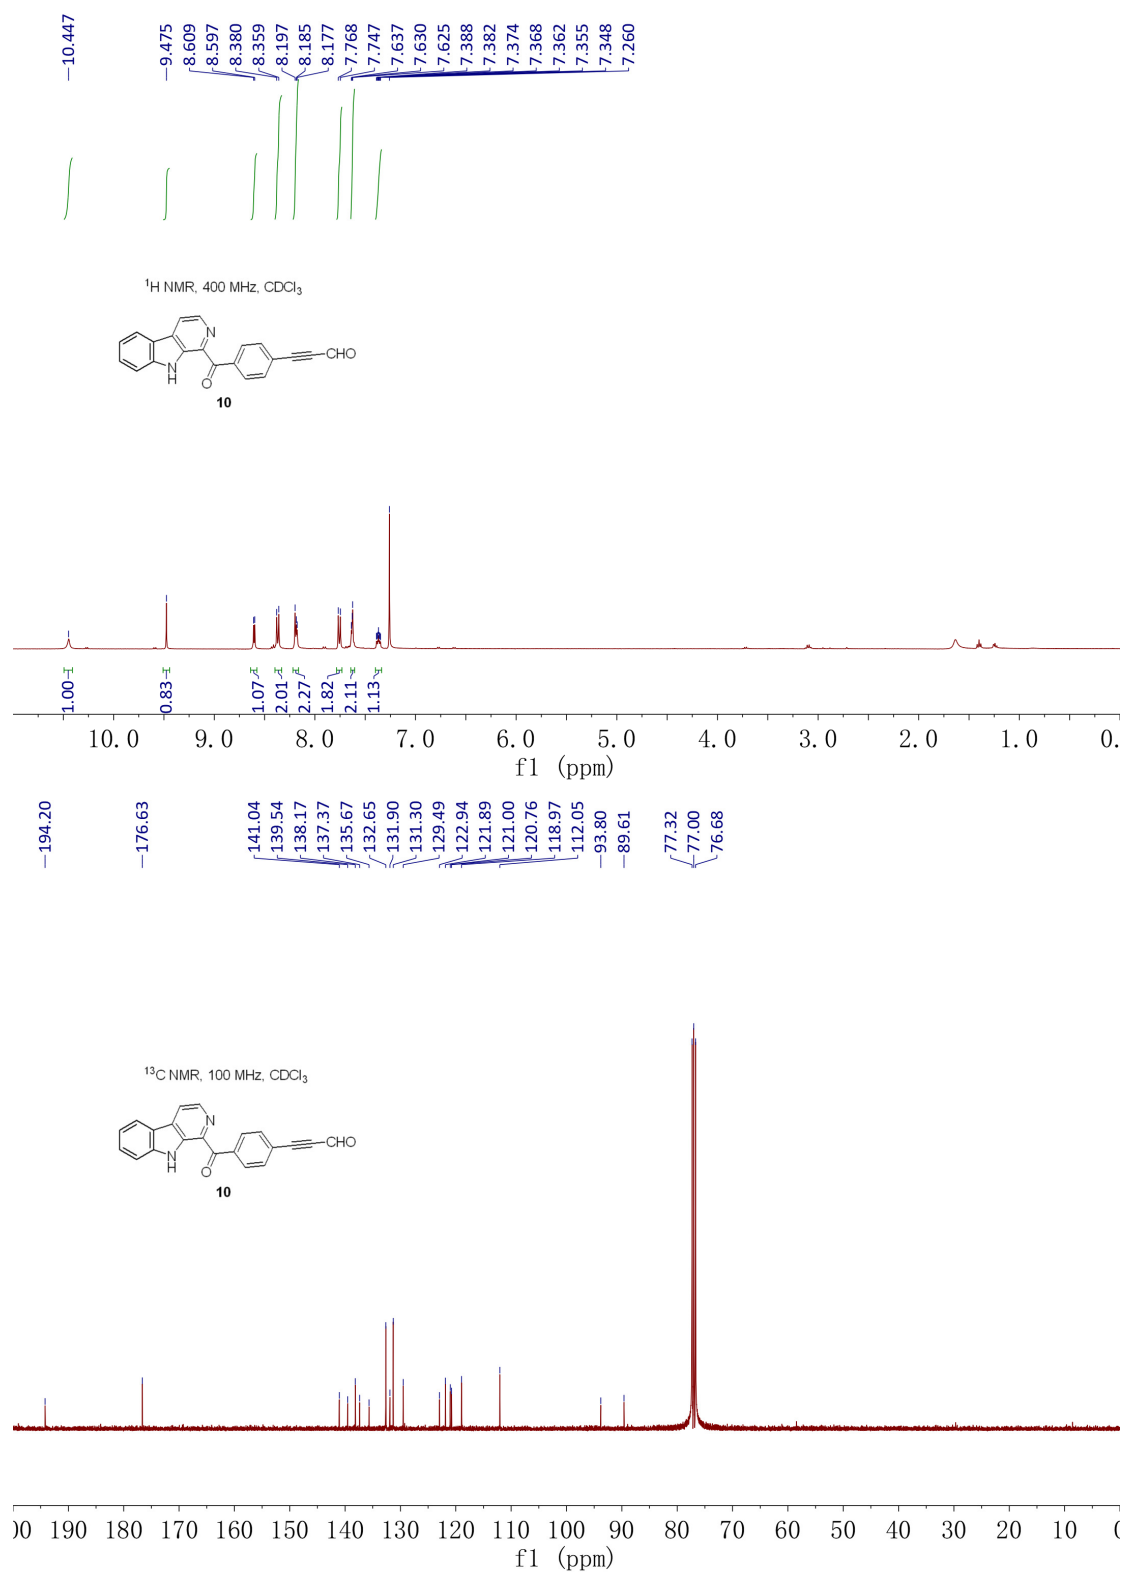

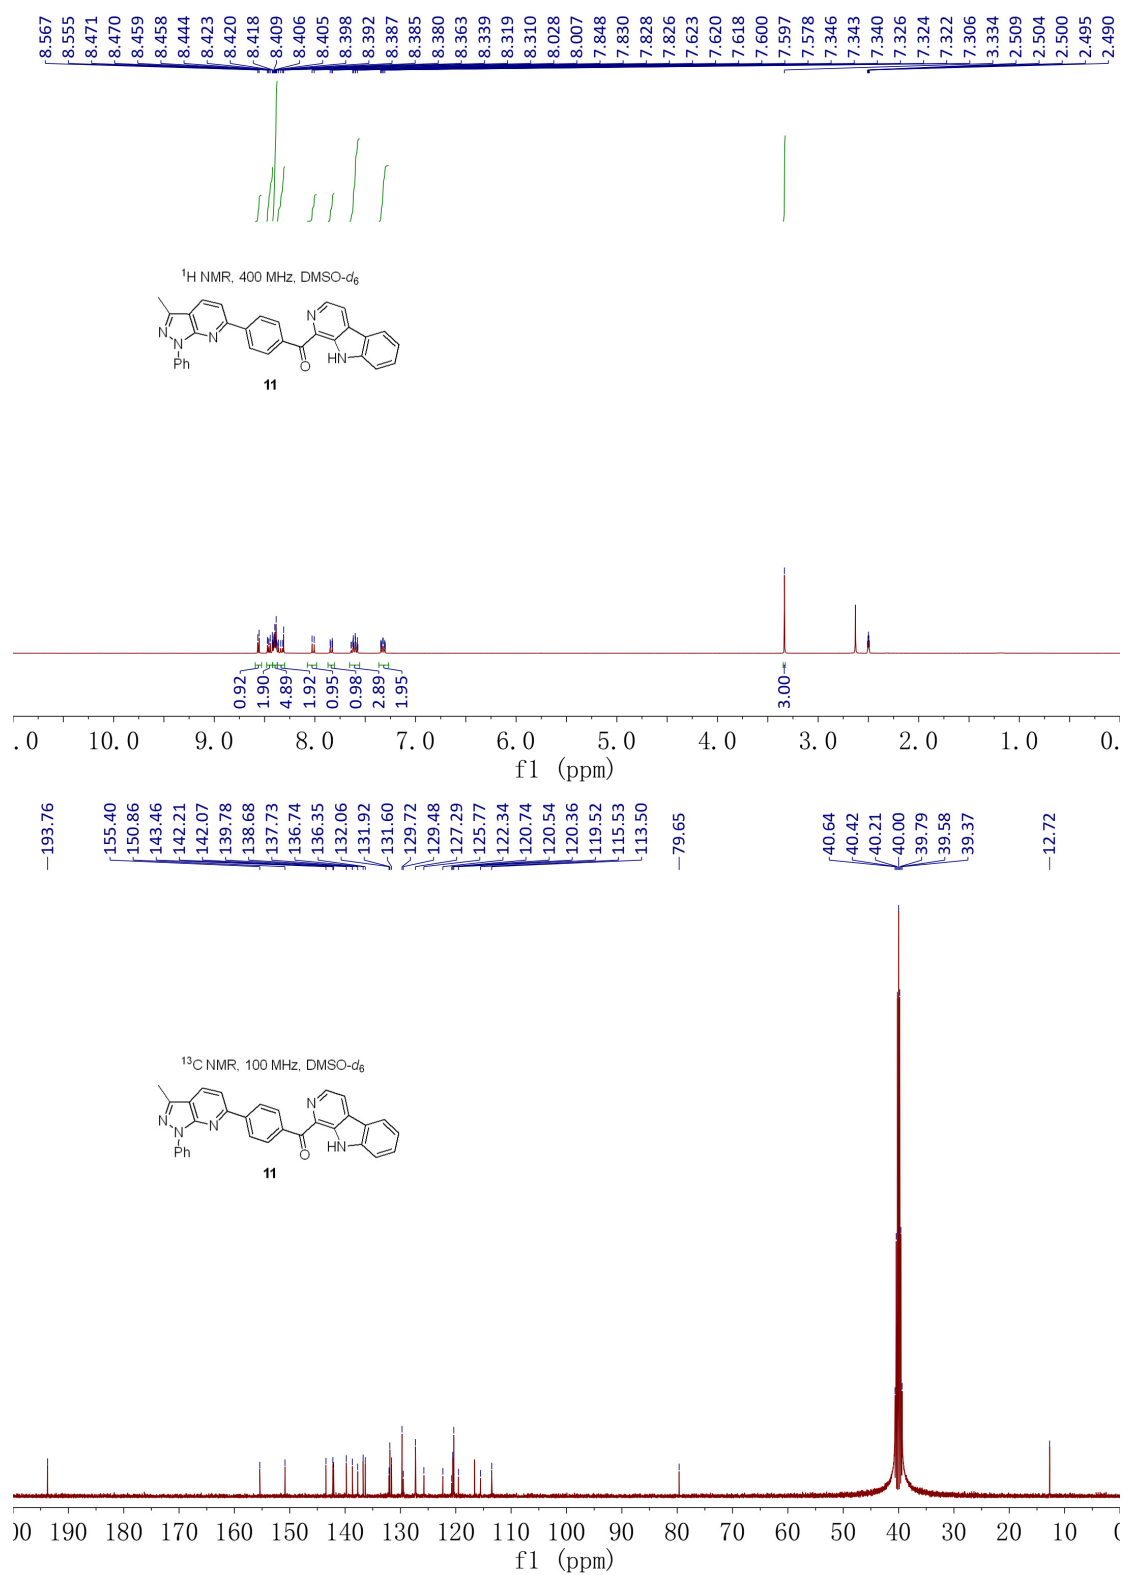

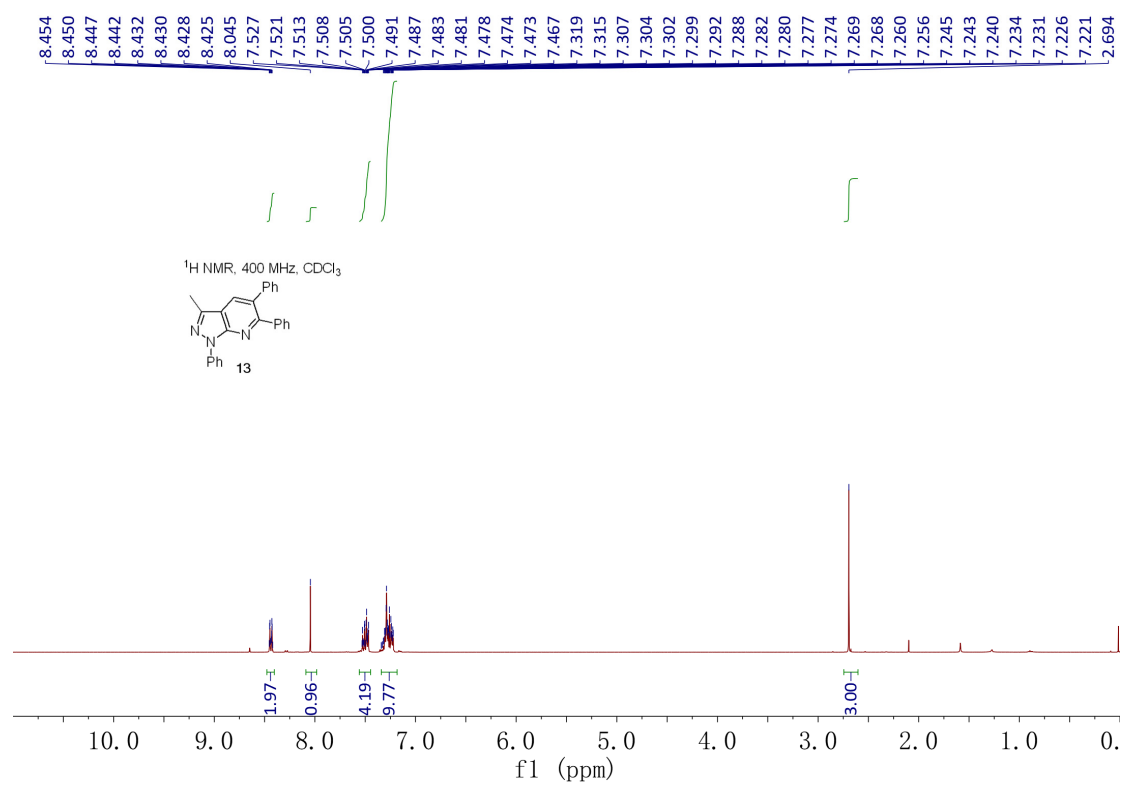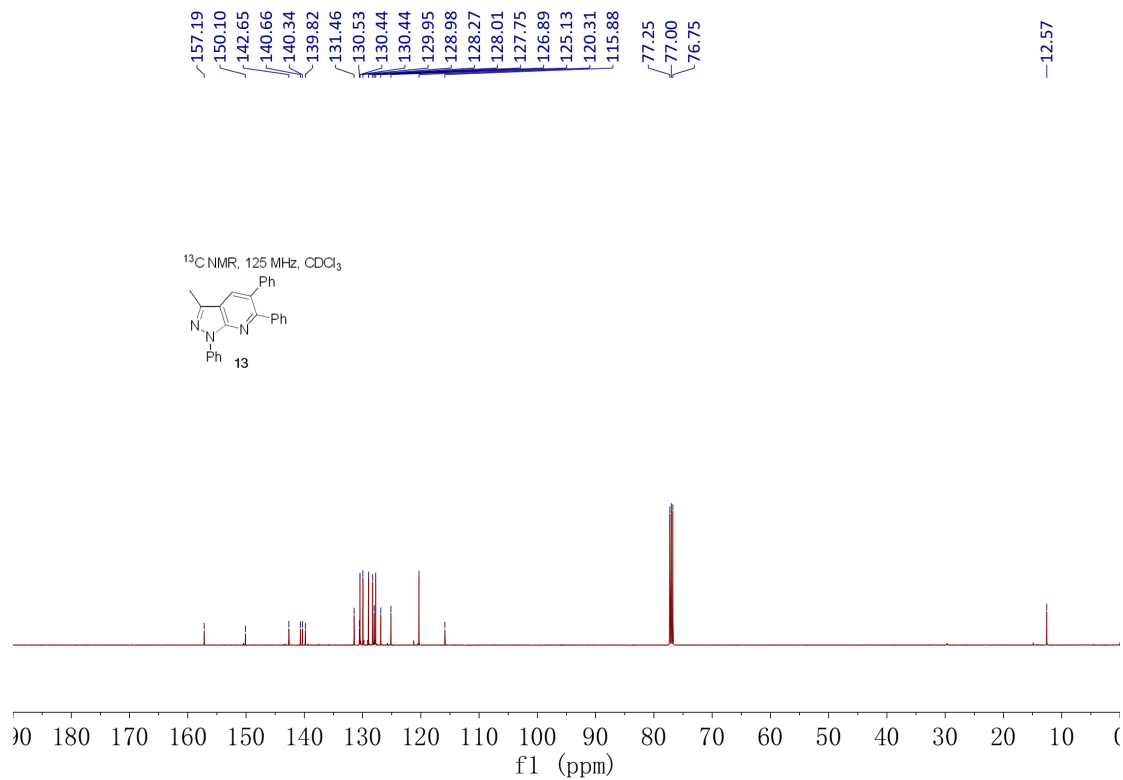

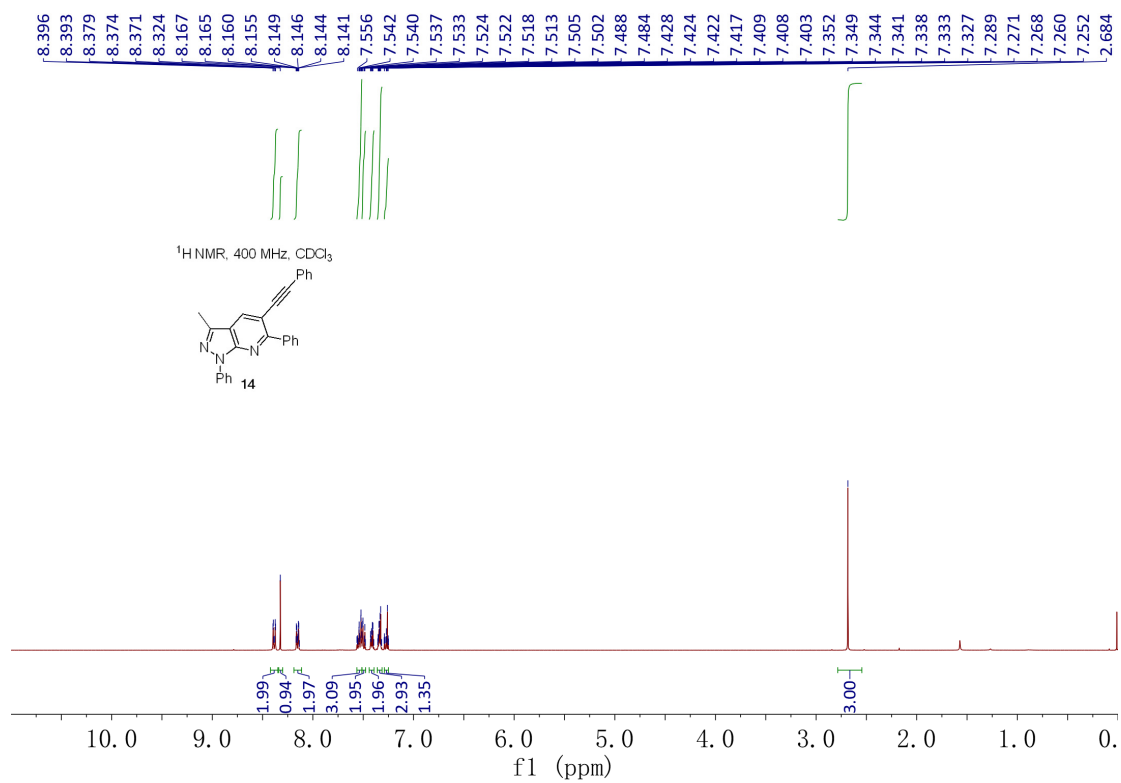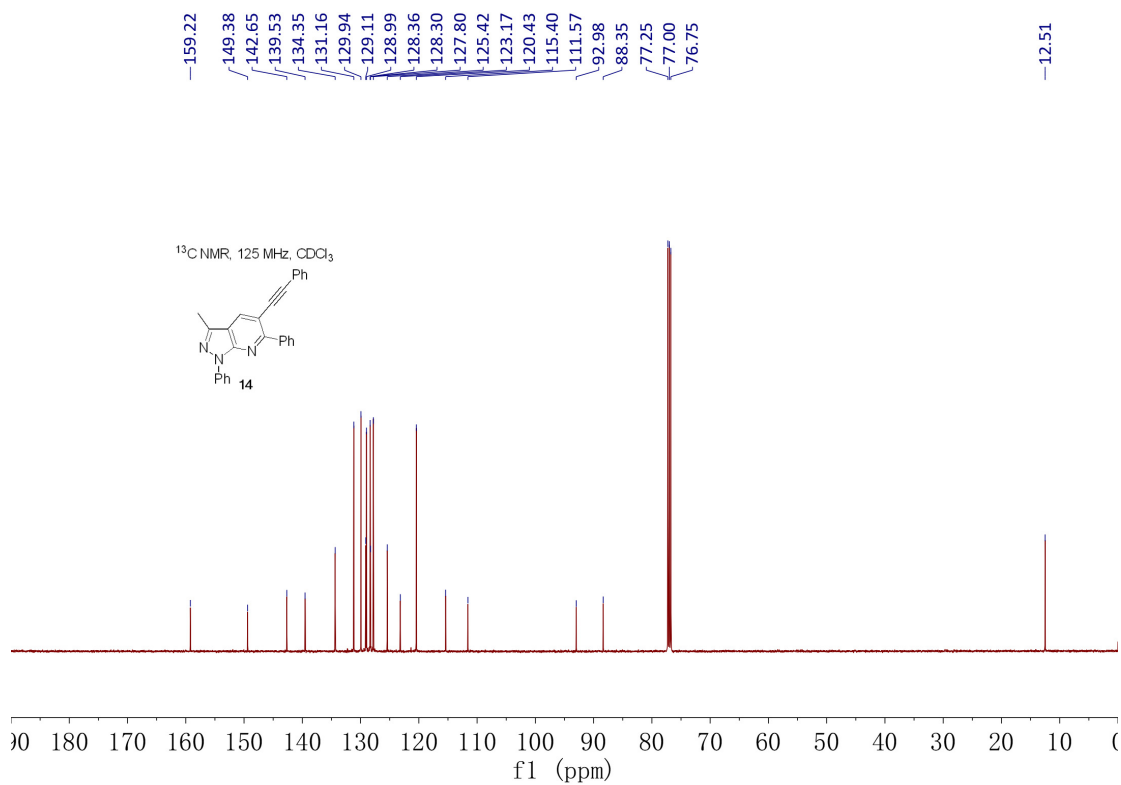

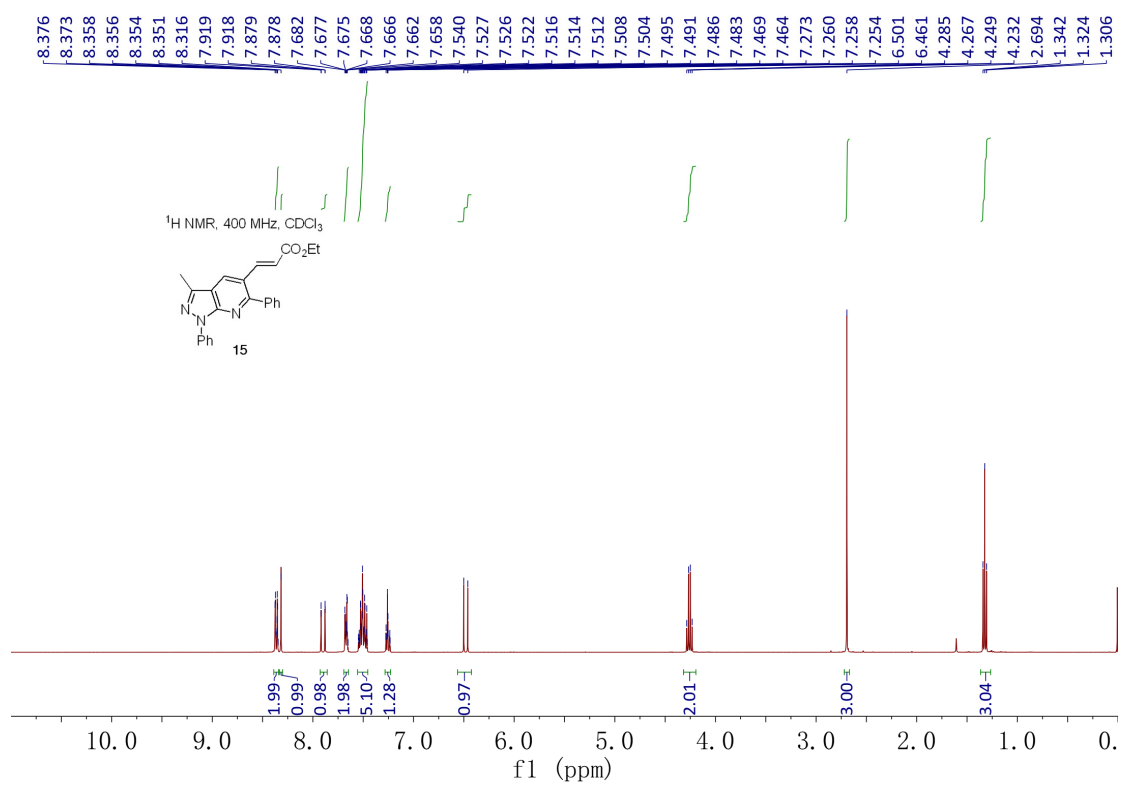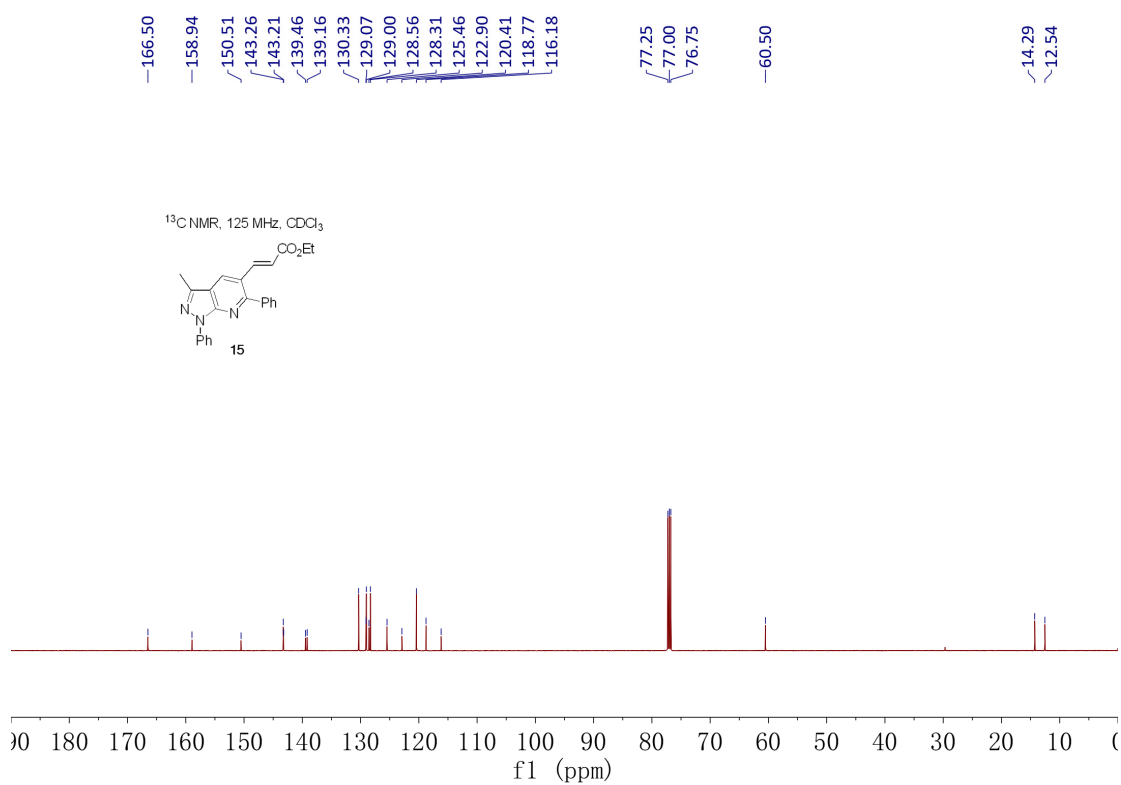

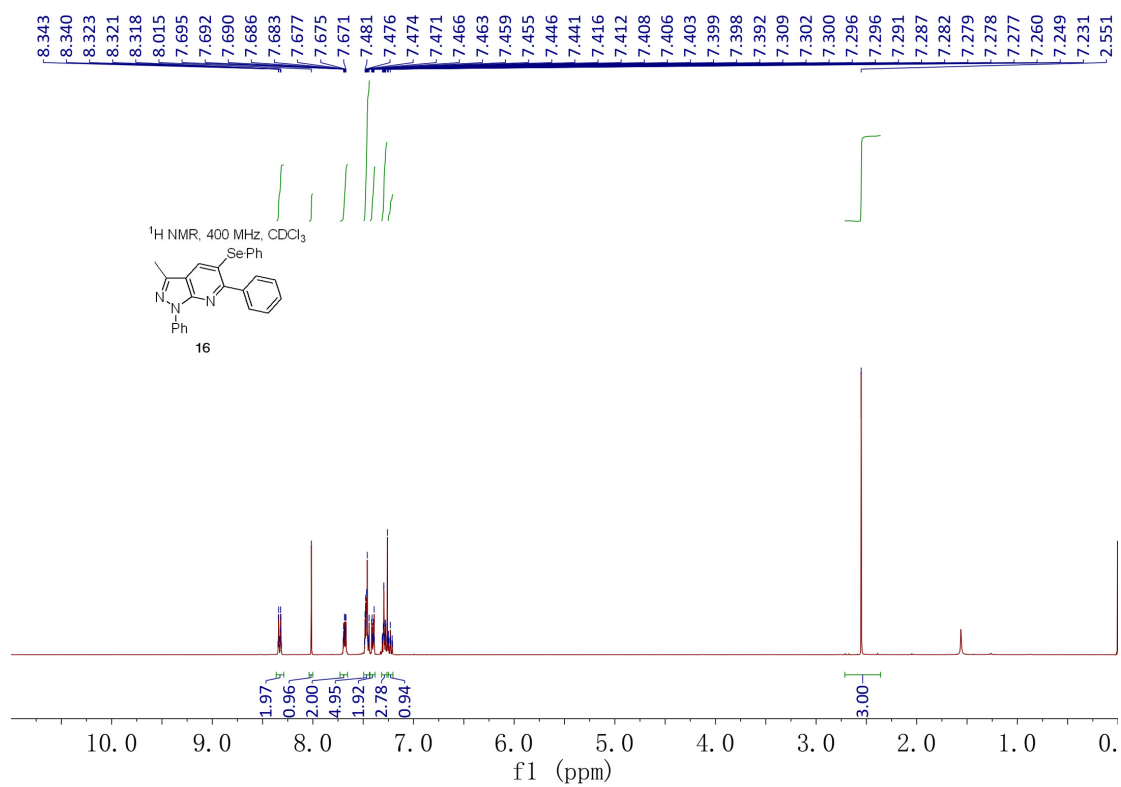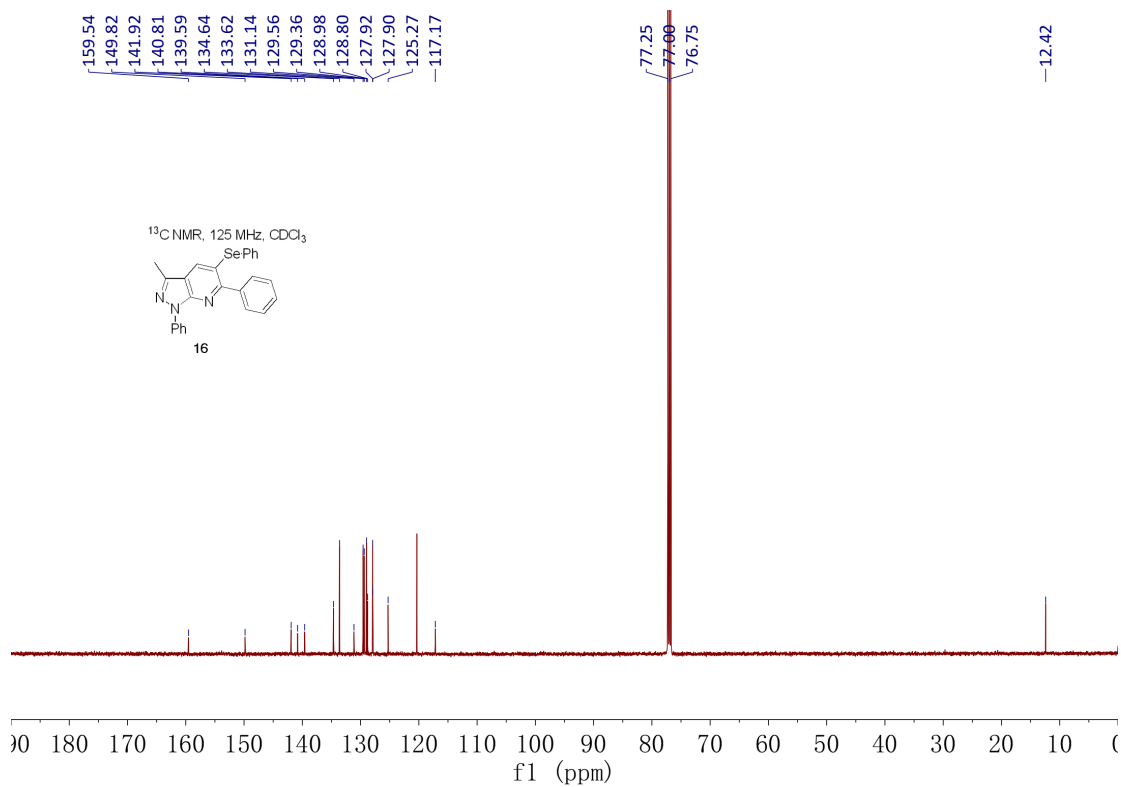

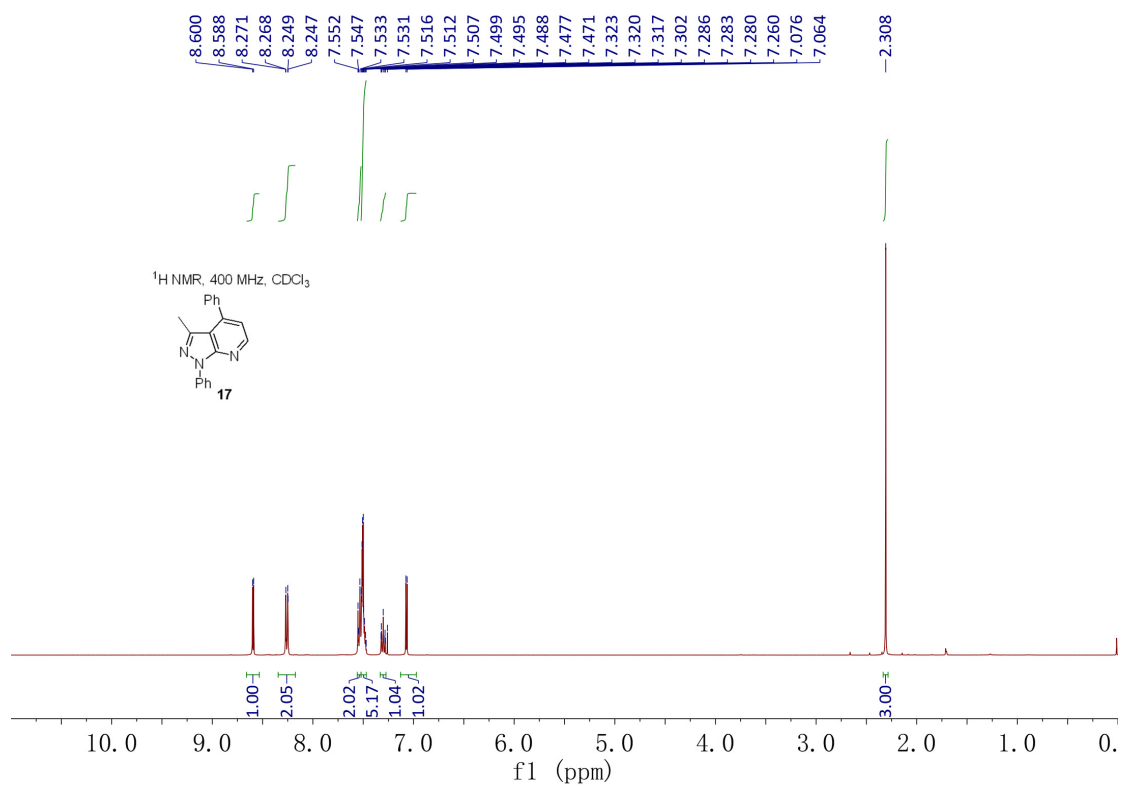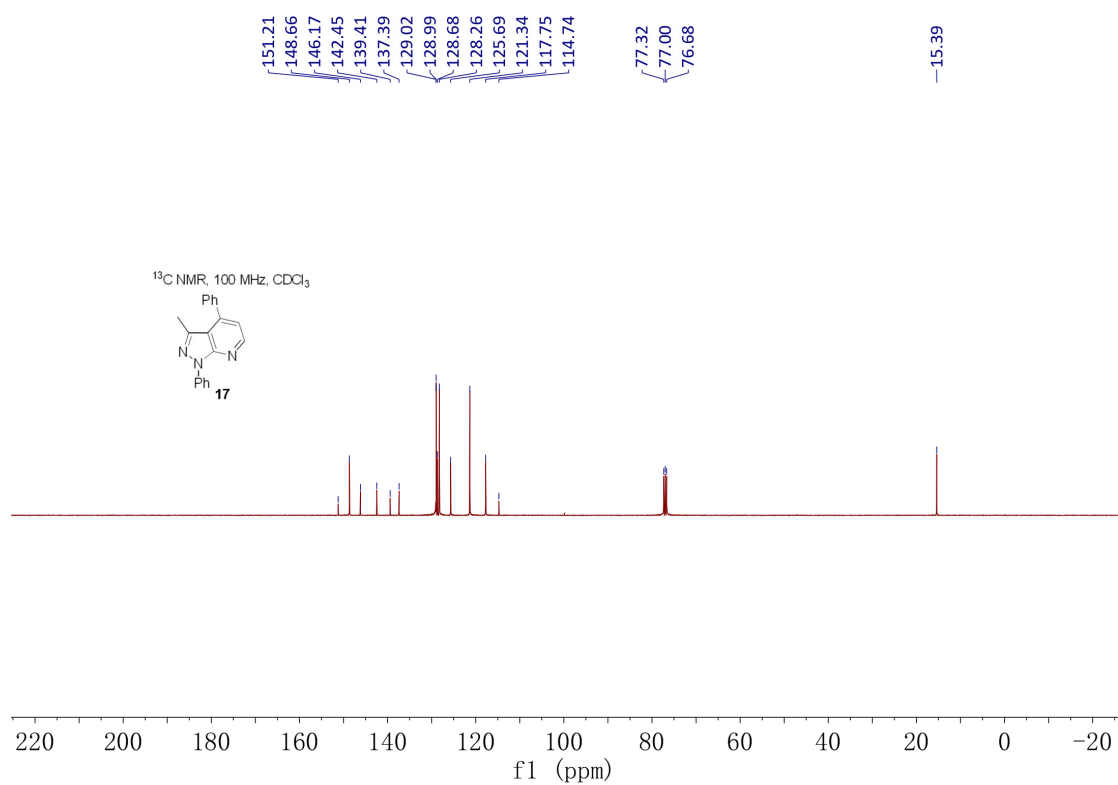

Supplement: Supplementary file 1 [file molecules-27-06381-s001.zip › molecules-1925181-supplementary.pdf]
